# Supplementary material for: Australian Tourist Flow: A Gravity Model Approach
Source: Preprints.org preprint supplement (doi:10.20944/preprints202403.1791.v1), 2024-03-29
Supplement: Supplementary file 2 [file supplementary]

## Sheet: Sheet2
Months	Partner Country	C_ID	Tourist_Flow	LN_Tourist_Flow	GDPD	LN_GDPD	GDPP	LN_GDPP	Mig_D	LN_Mig_D	Mig_P	LN_Mig_P	T_POP_D	LN_T_POP_D	TOT_POP_P	LN_TPOP_P	COL	CONT	DIST	LN DIST	LANDLOCK	ISLAND	BOTH_ISLAND	ONE_ISLAND	NO_ISLAND	COMLANG	COVCASES_D	COVCASES_P	COVMORT_D	COVMORT_P	COVVACC_D	COVVACC_P	COV_STR_D	COV_STR_P	COV_D	JAN	FEB	MAR	APR	MAY	JUN	JUL	AUG	SEP	OCT	NOV	DEC	Brunei	Canada
2018-01-01	Brunei	1	15748	9.66453	100.485	4.61	99.1143	4.59627	934	6.84055	3230	8.08055	24970000	17.0332	434274	12.9814	1	1	2.6268e+06	14.7813	0	0	0	1	0	144	0	0	0	0	0	0	0	0	0	1	0	0	0	0	0	0	0	0	0	0	0	1	0
2018-01-02	Canada	2	73164	11.2005	100.485	4.61	113.08	4.72809	24721	10.1154	51330	10.8461	24970000	17.0332	37065084	17.4282	1	1	2.24219e+06	14.623	0	0	0	1	0	176	0	0	0	0	0	0	0	0	0	1	0	0	0	0	0	0	0	0	0	0	0	0	1
2018-01-03	Chile	3	58682	10.9799	100.485	4.61	127.16	4.84544	1236	7.12044	30550	10.3272	24970000	17.0332	18701450	16.7441	1	1	2.72558e+06	14.8182	0	0	0	1	0	163	0	0	0	0	0	0	0	0	0	1	0	0	0	0	0	0	0	0	0	0	0	0	0
2018-01-04	China	4	505886	13.1341	100.485	4.61	120.898	4.79495	13286	9.49454	526040	13.1731	24970000	17.0332	1402760000	21.0617	1	1	2.36518e+06	14.6764	0	0	0	1	0	18	0	0	0	0	0	0	0	0	0	1	0	0	0	0	0	0	0	0	0	0	0	0	0
2018-01-06	Fiji	5	99593	11.5089	100.485	4.61	126.702	4.84184	2144	7.67089	71800	11.1817	24970000	17.0332	918996	13.731	1	0	3.25977e+06	14.9972	0	1	1	1	0	140	0	0	0	0	0	0	0	0	0	1	0	0	0	0	0	0	0	0	0	0	0	0	0
2018-01-07	Hong Kong (SAR)	6	330946	12.7097	100.485	4.61	129.083	4.86046	9233	9.13065	96920	11.4817	24970000	17.0332	7452600	15.8241	1	1	2.4499e+06	14.7116	0	0	0	1	0	144	0	0	0	0	0	0	0	0	0	1	0	0	0	0	0	0	0	0	0	0	0	0	0
2018-01-08	India	7	15872	9.67237	100.485	4.61	163.235	5.09519	656	6.48768	468830	13.058	24970000	17.0332	1369003306	21.0373	1	1	2.08445e+06	14.55	0	0	0	1	0	141	0	0	0	0	0	0	0	0	0	1	0	0	0	0	0	0	0	0	0	0	0	0	0
2018-01-09	Indonesia	8	320832	12.6787	100.485	4.61	145.131	4.97764	11094	9.31425	83780	11.336	24970000	17.0332	267066843	19.403	1	1	2.66431e+06	14.7955	0	0	0	1	0	142	0	0	0	0	0	0	0	0	0	1	0	0	0	0	0	0	0	0	0	0	0	0	0
2018-01-10	Japan	9	168851	12.0368	100.485	4.61	104.939	4.65338	13365	9.50047	60050	11.0029	24970000	17.0332	126811000	18.6582	1	0	2.52658e+06	14.7424	0	1	1	1	0	3	0	0	0	0	0	0	0	0	0	1	0	0	0	0	0	0	0	0	0	0	0	0	0
2018-01-11	Korea	10	79454	11.2829	100.485	4.61	113.585	4.73255	5381	8.59082	106670	11.5775	24970000	17.0332	25638149	17.0596	0	1	2.44391e+06	14.7091	0	0	0	1	0	141	0	0	0	0	0	0	0	0	0	1	0	0	0	0	0	0	0	0	0	0	0	0	0
2018-01-12	Malaysia	11	311444	12.649	100.485	4.61	121.28	4.7981	5416	8.5973	166150	12.0207	24970000	17.0332	32399271	17.2936	1	1	2.52051e+06	14.74	0	0	0	1	0	144	0	0	0	0	0	0	0	0	0	1	0	0	0	0	0	0	0	0	0	0	0	0	0
2018-01-13	Mauritius	12	9000	9.10509	100.485	4.61	129.432	4.86316	145	4.98361	27590	10.2252	24970000	17.0332	1265303	14.0508	1	0	2.24274e+06	14.6232	0	1	1	1	0	176	0	0	0	0	0	0	0	0	0	1	0	0	0	0	0	0	0	0	0	0	0	0	0
2018-01-16	New Zealand	13	917057	13.7289	100.485	4.61	100.596	4.61111	66896	11.1109	607230	13.3167	24970000	17.0332	4900600	15.4049	1	0	3.33103e+06	15.0188	0	1	1	1	0	179	0	0	0	0	0	0	0	0	0	1	0	0	0	0	0	0	0	0	0	0	0	0	0
2018-01-18	Philippines	14	81154	11.3041	100.485	4.61	123.07	4.81275	4118	8.32337	246430	12.4148	24970000	17.0332	108568836	18.5029	1	0	2.62019e+06	14.7788	0	1	1	1	0	140	0	0	0	0	0	0	0	0	0	1	0	0	0	0	0	0	0	0	0	0	0	0	0
2018-01-19	Qatar	15	103850	11.5507	100.485	4.61	116.738	4.75993	0	0	1140	7.03966	24970000	17.0332	2766732	14.8332	1	1	1.80914e+06	14.4084	0	0	0	1	0	154	0	0	0	0	0	0	0	0	0	1	0	0	0	0	0	0	0	0	0	0	0	0	0
2018-01-20	Singapore	16	578404	13.268	100.485	4.61	113.302	4.73005	10446	9.25407	72860	11.1963	24970000	17.0332	5638676	15.5452	1	1	2.54598e+06	14.75	0	0	0	1	0	144	0	0	0	0	0	0	0	0	0	1	0	0	0	0	0	0	0	0	0	0	0	0	0
2018-01-21	Solomon Islands	17	7928	8.97828	100.485	4.61	129.213	4.86146	429	6.06379	2430	7.79606	24970000	17.0332	659249	13.3989	1	0	3.10584e+06	14.9488	0	1	1	1	0	140	0	0	0	0	0	0	0	0	0	1	0	0	0	0	0	0	0	0	0	0	0	0	0
2018-01-22	South Africa	18	38377	10.5552	100.485	4.61	149.01	5.00402	11898	9.38421	181450	12.1087	2.497e+07	17.0332	57339635	17.8645	1	1	2.18742e+06	14.5982	0	0	0	1	0	140	0	0	0	0	0	0	0	0	0	1	0	0	0	0	0	0	0	0	0	0	0	0	0
2018-01-23	Sri Lanka	19	16554	9.71444	100.485	4.61	150.978	5.01714	475	6.16542	117730	11.6762	2.497e+07	17.0332	21670000	16.8914	1	0	2.21538e+06	14.6109	0	1	1	1	0	141	0	0	0	0	0	0	0	0	0	1	0	0	0	0	0	0	0	0	0	0	0	0	0
2018-01-24	Taiwan	20	72372	11.1896	100.485	4.61	153.442	5.03332	0	0	4300	8.3666	2.497e+07	17.0332	23726185	16.9821	1	0	2.49793e+06	14.731	0	1	1	1	0	18	0	0	0	0	0	0	0	0	0	1	0	0	0	0	0	0	0	0	0	0	0	0	0
2018-01-25	Thailand	21	153959	11.9444	100.485	4.61	111.933	4.7179	11298	9.33247	72250	11.1879	2.497e+07	17.0332	71127802	18.08	0	1	2.38719e+06	14.6856	0	0	0	1	0	140	0	0	0	0	0	0	0	0	0	1	0	0	0	0	0	0	0	0	0	0	0	0	0
2018-01-26	Tonga	22	3344	8.11522	100.485	4.61	123.148	4.81338	0	0	12440	9.42875	2.497e+07	17.0332	105150	11.5631	1	0	3.29898e+06	15.0091	0	1	1	1	0	140	0	0	0	0	0	0	0	0	0	1	0	0	0	0	0	0	0	0	0	0	0	0	0
2018-01-27	UK	23	154920	11.9507	100.485	4.61	115.961	4.75325	135000	11.813	1195150	13.9938	2.497e+07	17.0332	9140169	16.0282	1	1	1.83975e+06	14.4251	0	0	1	1	0	154	0	0	0	0	0	0	0	0	0	1	0	0	0	0	0	0	0	0	0	0	0	0	0
2018-01-28	United Arab Emirates	24	543550	13.2059	100.485	4.61	117.981	4.77053	0	0	8480	9.04558	2.497e+07	17.0332	66460344	18.0121	1	1	1.69913e+06	14.3456	0	1	0	1	0	140	0	0	0	0	0	0	0	0	0	1	0	0	0	0	0	0	0	0	0	0	0	0	0
2018-01-29	USA	25	377651	12.8417	100.485	4.61	113.672	4.73331	93179	11.4423	104310	11.5551	2.497e+07	17.0332	326838199	19.605	1	1	2.35545e+06	14.6722	0	0	0	1	0	156	0	0	0	0	0	0	0	0	0	1	0	0	0	0	0	0	0	0	0	0	0	0	0
2018-01-31	Vietnam	26	65433	11.0888	100.485	4.61	156.578	5.05356	205	5.32788	236750	12.3748	2.497e+07	17.0332	94914330	18.3685	1	1	2.43923e+06	14.7072	0	0	0	1	0	179	0	0	0	0	0	0	0	0	0	1	0	0	0	0	0	0	0	0	0	0	0	0	0
2018-02-01	Brunei	1	14224	9.56276	100.574	4.6109	99.3863	4.59901	934	6.84055	3230	8.08055	2.497e+07	17.0332	434274	12.9814	1	1	2.6268e+06	14.7813	0	0	0	1	0	144	0	0	0	0	0	0	0	0	0	0	1	0	0	0	0	0	0	0	0	0	0	1	0
2018-02-02	Canada	2	47728	10.7733	100.574	4.6109	113.766	4.73415	24721	10.1154	51330	10.8461	2.497e+07	17.0332	37065084	17.4282	1	1	2.24219e+06	14.623	0	0	0	1	0	176	0	0	0	0	0	0	0	0	0	0	1	0	0	0	0	0	0	0	0	0	0	0	1
2018-02-03	Chile	3	51878	10.8567	100.574	4.6109	127.224	4.84595	1236	7.12044	30550	10.3272	2.497e+07	17.0332	18701450	16.7441	1	1	2.72558e+06	14.8182	0	0	0	1	0	163	0	0	0	0	0	0	0	0	0	0	1	0	0	0	0	0	0	0	0	0	0	0	0
2018-02-04	China	4	476948	13.0752	100.574	4.6109	122.392	4.80723	13286	9.49454	526040	13.1731	2.497e+07	17.0332	1402760000	21.0617	1	1	2.36518e+06	14.6764	0	0	0	1	0	18	0	0	0	0	0	0	0	0	0	0	1	0	0	0	0	0	0	0	0	0	0	0	0
2018-02-06	Fiji	5	64128	11.0687	100.574	4.6109	127.506	4.84816	2144	7.67089	71800	11.1817	2.497e+07	17.0332	918996	13.731	1	0	3.25977e+06	14.9972	0	1	1	1	0	140	0	0	0	0	0	0	0	0	0	0	1	0	0	0	0	0	0	0	0	0	0	0	0
2018-02-07	Hong Kong (SAR)	6	302189	12.6188	100.574	4.6109	130.705	4.87294	9233	9.13065	96920	11.4817	2.497e+07	17.0332	7452600	15.8241	1	1	2.4499e+06	14.7116	0	0	0	1	0	144	0	0	0	0	0	0	0	0	0	0	1	0	0	0	0	0	0	0	0	0	0	0	0
2018-02-08	India	7	14336	9.5706	100.574	4.6109	162.639	5.09153	656	6.48768	468830	13.058	2.497e+07	17.0332	1369003306	21.0373	1	1	2.08445e+06	14.55	0	0	0	1	0	141	0	0	0	0	0	0	0	0	0	0	1	0	0	0	0	0	0	0	0	0	0	0	0
2018-02-09	Indonesia	8	263867	12.4832	100.574	4.6109	145.373	4.9793	11094	9.31425	83780	11.336	2.497e+07	17.0332	267066843	19.403	1	1	2.66431e+06	14.7955	0	0	0	1	0	142	0	0	0	0	0	0	0	0	0	0	1	0	0	0	0	0	0	0	0	0	0	0	0
2018-02-10	Japan	9	150142	11.9193	100.574	4.6109	104.939	4.65338	13365	9.50047	60050	11.0029	2.497e+07	17.0332	126811000	18.6582	1	0	2.52658e+06	14.7424	0	1	1	1	0	3	0	0	0	0	0	0	0	0	0	0	1	0	0	0	0	0	0	0	0	0	0	0	0
2018-02-11	Korea	10	54656	10.9088	100.574	4.6109	114.452	4.74015	5381	8.59082	106670	11.5775	2.497e+07	17.0332	25638149	17.0596	0	1	2.44391e+06	14.7091	0	0	0	1	0	141	0	0	0	0	0	0	0	0	0	0	1	0	0	0	0	0	0	0	0	0	0	0	0
2018-02-12	Malaysia	11	241697	12.3954	100.574	4.6109	121.28	4.7981	5416	8.5973	166150	12.0207	2.497e+07	17.0332	32399271	17.2936	1	1	2.52051e+06	14.74	0	0	0	1	0	144	0	0	0	0	0	0	0	0	0	0	1	0	0	0	0	0	0	0	0	0	0	0	0
2018-02-13	Mauritius	12	4592	8.43229	100.574	4.6109	131.977	4.88263	145	4.98361	27590	10.2252	2.497e+07	17.0332	1265303	14.0508	1	0	2.24274e+06	14.6232	0	1	1	1	0	176	0	0	0	0	0	0	0	0	0	0	1	0	0	0	0	0	0	0	0	0	0	0	0
2018-02-16	New Zealand	13	758917	13.5396	100.574	4.6109	100.552	4.61068	66896	11.1109	607230	13.3167	2.497e+07	17.0332	4900600	15.4049	1	0	3.33103e+06	15.0188	0	1	1	1	0	179	0	0	0	0	0	0	0	0	0	0	1	0	0	0	0	0	0	0	0	0	0	0	0
2018-02-18	Philippines	14	63446	11.058	100.574	4.6109	123.956	4.81993	4118	8.32337	2,46,430	#VALUE!	2.497e+07	17.0332	108568836	18.5029	1	0	2.62019e+06	14.7788	0	1	1	1	0	140	0	0	0	0	0	0	0	0	0	0	1	0	0	0	0	0	0	0	0	0	0	0	0
2018-02-19	Qatar	15	118144	11.6797	100.574	4.6109	116.738	4.75993	0	0	1140	7.03966	2.497e+07	17.0332	2766732	14.8332	1	1	1.80914e+06	14.4084	0	0	0	1	0	154	0	0	0	0	0	0	0	0	0	0	1	0	0	0	0	0	0	0	0	0	0	0	0
2018-02-20	Singapore	16	497498	13.1173	100.574	4.6109	113.835	4.73475	10446	9.25407	72860	11.1963	2.497e+07	17.0332	5638676	15.5452	1	1	2.54598e+06	14.75	0	0	0	1	0	144	0	0	0	0	0	0	0	0	0	0	1	0	0	0	0	0	0	0	0	0	0	0	0
2018-02-21	Solomon Islands	17	7168	8.87752	100.574	4.6109	131.905	4.88208	429	6.06379	2430	7.79606	2.497e+07	17.0332	659249	13.3989	1	0	3.10584e+06	14.9488	0	1	1	1	0	140	0	0	0	0	0	0	0	0	0	0	1	0	0	0	0	0	0	0	0	0	0	0	0
2018-02-22	South Africa	18	30102	10.3124	100.574	4.6109	149.89	5.0099	11898	9.38421	181450	12.1087	2.497e+07	17.0332	57339635	17.8645	1	1	2.18742e+06	14.5982	0	0	0	1	0	140	0	0	0	0	0	0	0	0	0	0	1	0	0	0	0	0	0	0	0	0	0	0	0
2018-02-23	Sri Lanka	19	14952	9.61267	100.574	4.6109	148.458	5.0003	475	6.16542	117730	11.6762	2.497e+07	17.0332	21670000	16.8914	1	0	2.21538e+06	14.6109	0	1	1	1	0	141	0	0	0	0	0	0	0	0	0	0	1	0	0	0	0	0	0	0	0	0	0	0	0
2018-02-24	Taiwan	20	64806	11.0792	100.574	4.6109	153.442	5.03332	0	0	4300	8.3666	2.497e+07	17.0332	23726185	16.9821	1	0	2.49793e+06	14.731	0	1	1	1	0	18	0	0	0	0	0	0	0	0	0	0	1	0	0	0	0	0	0	0	0	0	0	0	0
2018-02-25	Thailand	21	136855	11.8267	100.574	4.6109	111.679	4.71563	11298	9.33247	72250	11.1879	2.497e+07	17.0332	71127802	18.08	0	1	2.38719e+06	14.6856	0	0	0	1	0	140	0	0	0	0	0	0	0	0	0	0	1	0	0	0	0	0	0	0	0	0	0	0	0
2018-02-26	Tonga	22	2288	7.73587	100.574	4.6109	124.434	4.82378	0	0	12440	9.42875	2.497e+07	17.0332	105150	11.5631	1	0	3.29898e+06	15.0091	0	1	1	1	0	140	0	0	0	0	0	0	0	0	0	0	1	0	0	0	0	0	0	0	0	0	0	0	0
2018-02-27	UK	23	137794	11.8335	100.574	4.6109	116.405	4.75707	135000	11.813	1195150	13.9938	2.497e+07	17.0332	9140169	16.0282	1	1	1.83975e+06	14.4251	0	0	1	1	0	154	0	0	0	0	0	0	0	0	0	0	1	0	0	0	0	0	0	0	0	0	0	0	0
2018-02-28	United Arab Emirates	24	487834	13.0977	100.574	4.6109	117.808	4.76906	0	0	8480	9.04558	2.497e+07	17.0332	66460344	18.0121	1	1	1.69913e+06	14.3456	0	1	0	1	0	140	0	0	0	0	0	0	0	0	0	0	1	0	0	0	0	0	0	0	0	0	0	0	0
2018-02-25	USA	25	317075	12.6669	100.574	4.6109	114.187	4.73784	93179	11.4423	104310	11.5551	2.497e+07	17.0332	326838199	19.605	1	1	2.35545e+06	14.6722	0	0	0	1	0	156	0	0	0	0	0	0	0	0	0	0	1	0	0	0	0	0	0	0	0	0	0	0	0
2018-02-27	Vietnam	26	54014	10.897	100.574	4.6109	157.717	5.0608	205	5.32788	236750	12.3748	2.497e+07	17.0332	94914330	18.3685	1	1	2.43923e+06	14.7072	0	0	0	1	0	179	0	0	0	0	0	0	0	0	0	0	1	0	0	0	0	0	0	0	0	0	0	0	0
2018-03-01	Brunei	1	15748	9.66453	100.653	4.61168	99.6983	4.60215	934	6.84055	3230	8.08055	2.497e+07	17.0332	434274	12.9814	1	1	2.6268e+06	14.7813	0	0	0	1	0	144	0	0	0	0	0	0	0	0	0	0	0	1	0	0	0	0	0	0	0	0	0	1	0
2018-03-02	Canada	2	53886	10.8946	100.653	4.61168	114.11	4.73716	24721	10.1154	51330	10.8461	2.497e+07	17.0332	37065084	17.4282	1	1	2.24219e+06	14.623	0	0	0	1	0	176	0	0	0	0	0	0	0	0	0	0	0	1	0	0	0	0	0	0	0	0	0	0	1
2018-03-03	Chile	3	57034	10.9514	100.653	4.61168	127.482	4.84798	1236	7.12044	30550	10.3272	2.497e+07	17.0332	18701450	16.7441	1	1	2.72558e+06	14.8182	0	0	0	1	0	163	0	0	0	0	0	0	0	0	0	0	0	1	0	0	0	0	0	0	0	0	0	0	0
2018-03-04	China	4	418219	12.9438	100.653	4.61168	121.013	4.7959	13286	9.49454	526040	13.1731	2.497e+07	17.0332	1402760000	21.0617	1	1	2.36518e+06	14.6764	0	0	0	1	0	18	0	0	0	0	0	0	0	0	0	0	0	1	0	0	0	0	0	0	0	0	0	0	0
2018-03-06	Fiji	5	80249	11.2929	100.653	4.61168	128.08	4.85265	2144	7.67089	71800	11.1817	2.497e+07	17.0332	918996	13.731	1	0	3.25977e+06	14.9972	0	1	1	1	0	140	0	0	0	0	0	0	0	0	0	0	0	1	0	0	0	0	0	0	0	0	0	0	0
2018-03-07	Hong Kong (SAR)	6	315129	12.6607	100.653	4.61168	130.3	4.86984	9233	9.13065	96920	11.4817	2.497e+07	17.0332	7452600	15.8241	1	1	2.4499e+06	14.7116	0	0	0	1	0	144	0	0	0	0	0	0	0	0	0	0	0	1	0	0	0	0	0	0	0	0	0	0	0
2018-03-08	India	7	16384	9.70412	100.653	4.61168	162.758	5.09227	656	6.48768	468830	13.058	2.497e+07	17.0332	1369003306	21.0373	1	1	2.08445e+06	14.55	0	0	0	1	0	141	0	0	0	0	0	0	0	0	0	0	0	1	0	0	0	0	0	0	0	0	0	0	0
2018-03-09	Indonesia	8	293027	12.588	100.653	4.61168	145.659	4.98127	11094	9.31425	83780	11.336	2.497e+07	17.0332	267066843	19.403	1	1	2.66431e+06	14.7955	0	0	0	1	0	142	0	0	0	0	0	0	0	0	0	0	0	1	0	0	0	0	0	0	0	0	0	0	0
2018-03-10	Japan	9	166627	12.0235	100.653	4.61168	104.623	4.65036	13365	9.50047	60050	11.0029	2.497e+07	17.0332	126811000	18.6582	1	0	2.52658e+06	14.7424	0	1	1	1	0	3	0	0	0	0	0	0	0	0	0	0	0	1	0	0	0	0	0	0	0	0	0	0	0
2018-03-11	Korea	10	53962	10.8961	100.653	4.61168	114.331	4.7391	5381	8.59082	106670	11.5775	2.497e+07	17.0332	25638149	17.0596	0	1	2.44391e+06	14.7091	0	0	0	1	0	141	0	0	0	0	0	0	0	0	0	0	0	1	0	0	0	0	0	0	0	0	0	0	0
2018-03-12	Malaysia	11	264042	12.4839	100.653	4.61168	120.88	4.7948	5416	8.5973	166150	12.0207	2.497e+07	17.0332	32399271	17.2936	1	1	2.52051e+06	14.74	0	0	0	1	0	144	0	0	0	0	0	0	0	0	0	0	0	1	0	0	0	0	0	0	0	0	0	0	0
2018-03-13	Mauritius	12	4538	8.42046	100.653	4.61168	132.751	4.88848	145	4.98361	27590	10.2252	2.497e+07	17.0332	1265303	14.0508	1	0	2.24274e+06	14.6232	0	1	1	1	0	176	0	0	0	0	0	0	0	0	0	0	0	1	0	0	0	0	0	0	0	0	0	0	0
2018-03-16	New Zealand	13	819151	13.616	100.653	4.61168	100.503	4.61019	66896	11.1109	607230	13.3167	2.497e+07	17.0332	4900600	15.4049	1	0	3.33103e+06	15.0188	0	1	1	1	0	179	0	0	0	0	0	0	0	0	0	0	0	1	0	0	0	0	0	0	0	0	0	0	0
2018-03-18	Philippines	14	65697	11.0928	100.653	4.61168	124.589	4.82502	4118	8.32337	246430	12.4148	2.497e+07	17.0332	108568836	18.5029	1	0	2.62019e+06	14.7788	0	1	1	1	0	140	0	0	0	0	0	0	0	0	0	0	0	1	0	0	0	0	0	0	0	0	0	0	0
2018-03-19	Qatar	15	147959	11.9047	100.653	4.61168	116.418	4.75719	0	0	1140	7.03966	2.497e+07	17.0332	2766732	14.8332	1	1	1.80914e+06	14.4084	0	0	0	1	0	154	0	0	0	0	0	0	0	0	0	0	0	1	0	0	0	0	0	0	0	0	0	0	0
2018-03-20	Singapore	16	549207	13.2162	100.653	4.61168	113.604	4.73272	10446	9.25407	72860	11.1963	2.497e+07	17.0332	5638676	15.5452	1	1	2.54598e+06	14.75	0	0	0	1	0	144	0	0	0	0	0	0	0	0	0	0	0	1	0	0	0	0	0	0	0	0	0	0	0
2018-03-21	Solomon Islands	17	7520	8.92545	100.653	4.61168	131.572	4.87955	429	6.06379	2430	7.79606	2.497e+07	17.0332	659249	13.3989	1	0	3.10584e+06	14.9488	0	1	1	1	0	140	0	0	0	0	0	0	0	0	0	0	0	1	0	0	0	0	0	0	0	0	0	0	0
2018-03-22	South Africa	18	32501	10.3891	100.653	4.61168	150.594	5.01459	11898	9.38421	181450	12.1087	2.497e+07	17.0332	57339635	17.8645	1	1	2.18742e+06	14.5982	0	0	0	1	0	140	0	0	0	0	0	0	0	0	0	0	0	1	0	0	0	0	0	0	0	0	0	0	0
2018-03-23	Sri Lanka	19	16554	9.71444	100.653	4.61168	147.378	4.993	475	6.16542	117730	11.6762	2.497e+07	17.0332	21670000	16.8914	1	0	2.21538e+06	14.6109	0	1	1	1	0	141	0	0	0	0	0	0	0	0	0	0	0	1	0	0	0	0	0	0	0	0	0	0	0
2018-03-24	Taiwan	20	58308	10.9735	100.653	4.61168	153.442	5.03332	0	0	4300	8.3666	2.497e+07	17.0332	23726185	16.9821	1	0	2.49793e+06	14.731	0	1	1	1	0	18	0	0	0	0	0	0	0	0	0	0	0	1	0	0	0	0	0	0	0	0	0	0	0
2018-03-25	Thailand	21	151166	11.9261	100.653	4.61168	111.58	4.71474	11298	9.33247	72250	11.1879	2.497e+07	17.0332	71127802	18.08	0	1	2.38719e+06	14.6856	0	0	0	1	0	140	0	0	0	0	0	0	0	0	0	0	0	1	0	0	0	0	0	0	0	0	0	0	0
2018-03-26	Tonga	22	2992	8.00403	100.653	4.61168	126.622	4.84121	0	0	12440	9.42875	2.497e+07	17.0332	105150	11.5631	1	0	3.29898e+06	15.0091	0	1	1	1	0	140	0	0	0	0	0	0	0	0	0	0	0	1	0	0	0	0	0	0	0	0	0	0	0
2018-03-27	UK	23	147214	11.8996	100.653	4.61168	116.627	4.75898	135000	11.813	1195150	13.9938	2.497e+07	17.0332	9140169	16.0282	1	1	1.83975e+06	14.4251	0	0	1	1	0	154	0	0	0	0	0	0	0	0	0	0	0	1	0	0	0	0	0	0	0	0	0	0	0
2018-03-28	United Arab Emirates	24	541386	13.2019	100.653	4.61168	117.048	4.76258	0	0	8480	9.04558	2.497e+07	17.0332	66460344	18.0121	1	1	1.69913e+06	14.3456	0	1	0	1	0	140	0	0	0	0	0	0	0	0	0	0	0	1	0	0	0	0	0	0	0	0	0	0	0
2018-03-29	USA	25	352179	12.7719	100.653	4.61168	114.445	4.7401	93179	11.4423	104310	11.5551	2.497e+07	17.0332	326838199	19.605	1	1	2.35545e+06	14.6722	0	0	0	1	0	156	0	0	0	0	0	0	0	0	0	0	0	1	0	0	0	0	0	0	0	0	0	0	0
2018-03-31	Vietnam	26	59982	11.0018	100.653	4.61168	157.292	5.05811	205	5.32788	236750	12.3748	2.497e+07	17.0332	94914330	18.3685	1	1	2.43923e+06	14.7072	0	0	0	1	0	179	0	0	0	0	0	0	0	0	0	0	0	1	0	0	0	0	0	0	0	0	0	0	0
2018-04-01	Brunei	1	15240	9.63174	100.713	4.61227	99.4572	4.59973	934	6.84055	3230	8.08055	2.497e+07	17.0332	434274	12.9814	1	1	2.6268e+06	14.7813	0	0	0	1	0	144	0	0	0	0	0	0	0	0	0	0	0	0	1	0	0	0	0	0	0	0	0	1	0
2018-04-02	Canada	2	51505	10.8495	100.713	4.61227	114.453	4.74017	24721	10.1154	51330	10.8461	2.497e+07	17.0332	37065084	17.4282	1	1	2.24219e+06	14.623	0	0	0	1	0	176	0	0	0	0	0	0	0	0	0	0	0	0	1	0	0	0	0	0	0	0	0	0	1
2018-04-03	Chile	3	50854	10.8367	100.713	4.61227	127.882	4.85111	1236	7.12044	30550	10.3272	2.497e+07	17.0332	18701450	16.7441	1	1	2.72558e+06	14.8182	0	0	0	1	0	163	0	0	0	0	0	0	0	0	0	0	0	0	1	0	0	0	0	0	0	0	0	0	0
2018-04-04	China	4	376898	12.8397	100.713	4.61227	120.783	4.794	13286	9.49454	526040	13.1731	2.497e+07	17.0332	1402760000	21.0617	1	1	2.36518e+06	14.6764	0	0	0	1	0	18	0	0	0	0	0	0	0	0	0	0	0	0	1	0	0	0	0	0	0	0	0	0	0
2018-04-06	Fiji	5	92834	11.4386	100.713	4.61227	130.26	4.86953	2144	7.67089	71800	11.1817	2.497e+07	17.0332	918996	13.731	1	0	3.25977e+06	14.9972	0	1	1	1	0	140	0	0	0	0	0	0	0	0	0	0	0	0	1	0	0	0	0	0	0	0	0	0	0
2018-04-07	Hong Kong (SAR)	6	296199	12.5988	100.713	4.61227	130.164	4.8688	9233	9.13065	96920	11.4817	2.497e+07	17.0332	7452600	15.8241	1	1	2.4499e+06	14.7116	0	0	0	1	0	144	0	0	0	0	0	0	0	0	0	0	0	0	1	0	0	0	0	0	0	0	0	0	0
2018-04-08	India	7	17408	9.76474	100.713	4.61227	163.474	5.09665	656	6.48768	468830	13.058	2.497e+07	17.0332	1369003306	21.0373	1	1	2.08445e+06	14.55	0	0	0	1	0	141	0	0	0	0	0	0	0	0	0	0	0	0	1	0	0	0	0	0	0	0	0	0	0
2018-04-09	Indonesia	8	305118	12.6285	100.713	4.61227	145.802	4.98225	11094	9.31425	83780	11.336	2.497e+07	17.0332	267066843	19.403	1	1	2.66431e+06	14.7955	0	0	0	1	0	142	0	0	0	0	0	0	0	0	0	0	0	0	1	0	0	0	0	0	0	0	0	0	0
2018-04-10	Japan	9	156702	11.9621	100.713	4.61227	104.517	4.64935	13365	9.50047	60050	11.0029	2.497e+07	17.0332	126811000	18.6582	1	0	2.52658e+06	14.7424	0	1	1	1	0	3	0	0	0	0	0	0	0	0	0	0	0	0	1	0	0	0	0	0	0	0	0	0	0
2018-04-11	Korea	10	43054	10.6702	100.713	4.61227	114.54	4.74092	5381	8.59082	106670	11.5775	2.497e+07	17.0332	25638149	17.0596	0	1	2.44391e+06	14.7091	0	0	0	1	0	141	0	0	0	0	0	0	0	0	0	0	0	0	1	0	0	0	0	0	0	0	0	0	0
2018-04-12	Malaysia	11	263626	12.4823	100.713	4.61227	120.88	4.7948	5416	8.5973	166150	12.0207	2.497e+07	17.0332	32399271	17.2936	1	1	2.52051e+06	14.74	0	0	0	1	0	144	0	0	0	0	0	0	0	0	0	0	0	0	1	0	0	0	0	0	0	0	0	0	0
2018-04-13	Mauritius	12	6784	8.82247	100.713	4.61227	130.102	4.86832	145	4.98361	27590	10.2252	2.497e+07	17.0332	1265303	14.0508	1	0	2.24274e+06	14.6232	0	1	1	1	0	176	0	0	0	0	0	0	0	0	0	0	0	0	1	0	0	0	0	0	0	0	0	0	0
2018-04-16	New Zealand	13	780638	13.5679	100.713	4.61227	100.448	4.60964	66896	11.1109	607230	13.3167	2.497e+07	17.0332	4900600	15.4049	1	0	3.33103e+06	15.0188	0	1	1	1	0	179	0	0	0	0	0	0	0	0	0	0	0	0	1	0	0	0	0	0	0	0	0	0	0
2018-04-18	Philippines	14	65367	11.0878	100.713	4.61227	125.096	4.82908	4118	8.32337	246430	12.4148	2.497e+07	17.0332	108568836	18.5029	1	0	2.62019e+06	14.7788	0	1	1	1	0	140	0	0	0	0	0	0	0	0	0	0	0	0	1	0	0	0	0	0	0	0	0	0	0
2018-04-19	Qatar	15	143460	11.8738	100.713	4.61227	115.905	4.75277	0	0	1140	7.03966	2.497e+07	17.0332	2766732	14.8332	1	1	1.80914e+06	14.4084	0	0	0	1	0	154	0	0	0	0	0	0	0	0	0	0	0	0	1	0	0	0	0	0	0	0	0	0	0
2018-04-20	Singapore	16	540338	13.2	100.713	4.61227	113.071	4.72801	10446	9.25407	72860	11.1963	2.497e+07	17.0332	5638676	15.5452	1	1	2.54598e+06	14.75	0	0	0	1	0	144	0	0	0	0	0	0	0	0	0	0	0	0	1	0	0	0	0	0	0	0	0	0	0
2018-04-21	Solomon Islands	17	7428	8.91315	100.713	4.61227	131.572	4.87955	429	6.06379	2430	7.79606	2.497e+07	17.0332	659249	13.3989	1	0	3.10584e+06	14.9488	0	1	1	1	0	140	0	0	0	0	0	0	0	0	0	0	0	0	1	0	0	0	0	0	0	0	0	0	0
2018-04-22	South Africa	18	34276	10.4422	100.713	4.61227	151.473	5.02041	11898	9.38421	181450	12.1087	2.497e+07	17.0332	57339635	17.8645	1	1	2.18742e+06	14.5982	0	0	0	1	0	140	0	0	0	0	0	0	0	0	0	0	0	0	1	0	0	0	0	0	0	0	0	0	0
2018-04-23	Sri Lanka	19	16020	9.68166	100.713	4.61227	147.498	4.99381	475	6.16542	117730	11.6762	2.497e+07	17.0332	21670000	16.8914	1	0	2.21538e+06	14.6109	0	1	1	1	0	141	0	0	0	0	0	0	0	0	0	0	0	0	1	0	0	0	0	0	0	0	0	0	0
2018-04-24	Taiwan	20	58248	10.9725	100.713	4.61227	150.531	5.01417	0	0	4300	8.3666	2.497e+07	17.0332	23726185	16.9821	1	0	2.49793e+06	14.731	0	1	1	1	0	18	0	0	0	0	0	0	0	0	0	0	0	0	1	0	0	0	0	0	0	0	0	0	0
2018-04-25	Thailand	21	149592	11.9157	100.713	4.61227	112.077	4.71918	11298	9.33247	72250	11.1879	2.497e+07	17.0332	71127802	18.08	0	1	2.38719e+06	14.6856	0	0	0	1	0	140	0	0	0	0	0	0	0	0	0	0	0	0	1	0	0	0	0	0	0	0	0	0	0
2018-04-26	Tonga	22	2992	8.00403	100.713	4.61227	126.879	4.84324	0	0	12440	9.42875	2.497e+07	17.0332	105150	11.5631	1	0	3.29898e+06	15.0091	0	1	1	1	0	140	0	0	0	0	0	0	0	0	0	0	0	0	1	0	0	0	0	0	0	0	0	0	0
2018-04-27	UK	23	121704	11.7094	100.713	4.61227	117.07	4.76278	135000	11.813	1195150	13.9938	2.497e+07	17.0332	9140169	16.0282	1	1	1.83975e+06	14.4251	0	0	1	1	0	154	0	0	0	0	0	0	0	0	0	0	0	0	1	0	0	0	0	0	0	0	0	0	0
2018-04-28	United Arab Emirates	24	557811	13.2318	100.713	4.61227	116.784	4.76033	0	0	8480	9.04558	2.497e+07	17.0332	66460344	18.0121	1	1	1.69913e+06	14.3456	0	1	0	1	0	140	0	0	0	0	0	0	0	0	0	0	0	0	1	0	0	0	0	0	0	0	0	0	0
2018-04-29	USA	25	362340	12.8003	100.713	4.61227	114.9	4.74406	93179	11.4423	104310	11.5551	2.497e+07	17.0332	326838199	19.605	1	1	2.35545e+06	14.6722	0	0	0	1	0	156	0	0	0	0	0	0	0	0	0	0	0	0	1	0	0	0	0	0	0	0	0	0	0
2018-04-29	Vietnam	26	57424	10.9582	100.713	4.61227	157.424	5.05894	205	5.32788	236750	12.3748	2.497e+07	17.0332	94914330	18.3685	1	1	2.43923e+06	14.7072	0	0	0	1	0	179	0	0	0	0	0	0	0	0	0	0	0	0	1	0	0	0	0	0	0	0	0	0	0
2018-05-01	Brunei	1	15494	9.64827	100.745	4.6126	99.5266	4.60042	934	6.84055	3230	8.08055	2.497e+07	17.0332	434274	12.9814	1	1	2.6268e+06	14.7813	0	0	0	1	0	144	0	0	0	0	0	0	0	0	0	0	0	0	0	1	0	0	0	0	0	0	0	1	0
2018-05-02	Canada	2	53355	10.8847	100.745	4.6126	114.539	4.74092	24721	10.1154	51330	10.8461	2.497e+07	17.0332	37065084	17.4282	1	1	2.24219e+06	14.623	0	0	0	1	0	176	0	0	0	0	0	0	0	0	0	0	0	0	0	1	0	0	0	0	0	0	0	0	1
2018-05-03	Chile	3	49171	10.8031	100.745	4.6126	128.243	4.85393	1236	7.12044	30550	10.3272	2.497e+07	17.0332	18701450	16.7441	1	1	2.72558e+06	14.8182	0	0	0	1	0	163	0	0	0	0	0	0	0	0	0	0	0	0	0	1	0	0	0	0	0	0	0	0	0
2018-05-04	China	4	359453	12.7923	100.745	4.6126	120.553	4.79209	13286	9.49454	526040	13.1731	2.497e+07	17.0332	1402760000	21.0617	1	1	2.36518e+06	14.6764	0	0	0	1	0	18	0	0	0	0	0	0	0	0	0	0	0	0	0	1	0	0	0	0	0	0	0	0	0
2018-05-06	Fiji	5	90840	11.4169	100.745	4.6126	130.834	4.87393	2144	7.67089	71800	11.1817	2.497e+07	17.0332	918996	13.731	1	0	3.25977e+06	14.9972	0	1	1	1	0	140	0	0	0	0	0	0	0	0	0	0	0	0	0	1	0	0	0	0	0	0	0	0	0
2018-05-07	Hong Kong (SAR)	6	280329	12.5437	100.745	4.6126	130.3	4.86984	9233	9.13065	96920	11.4817	2.497e+07	17.0332	7452600	15.8241	1	1	2.4499e+06	14.7116	0	0	0	1	0	144	0	0	0	0	0	0	0	0	0	0	0	0	0	1	0	0	0	0	0	0	0	0	0
2018-05-08	India	7	17920	9.79373	100.745	4.6126	164.308	5.10175	656	6.48768	468830	13.058	2.497e+07	17.0332	1369003306	21.0373	1	1	2.08445e+06	14.55	0	0	0	1	0	141	0	0	0	0	0	0	0	0	0	0	0	0	0	1	0	0	0	0	0	0	0	0	0
2018-05-09	Indonesia	8	300204	12.6122	100.745	4.6126	146.109	4.98435	11094	9.31425	83780	11.336	2.497e+07	17.0332	267066843	19.403	1	1	2.66431e+06	14.7955	0	0	0	1	0	142	0	0	0	0	0	0	0	0	0	0	0	0	0	1	0	0	0	0	0	0	0	0	0
2018-05-10	Japan	9	147607	11.9023	100.745	4.6126	104.728	4.65137	13365	9.50047	60050	11.0029	2.497e+07	17.0332	126811000	18.6582	1	0	2.52658e+06	14.7424	0	1	1	1	0	3	0	0	0	0	0	0	0	0	0	0	0	0	0	1	0	0	0	0	0	0	0	0	0
2018-05-11	Korea	10	44362	10.7002	100.745	4.6126	114.595	4.74141	5381	8.59082	106670	11.5775	2.497e+07	17.0332	25638149	17.0596	0	1	2.44391e+06	14.7091	0	0	0	1	0	141	0	0	0	0	0	0	0	0	0	0	0	0	0	1	0	0	0	0	0	0	0	0	0
2018-05-12	Malaysia	11	254432	12.4468	100.745	4.6126	121.08	4.79645	5416	8.5973	166150	12.0207	2.497e+07	17.0332	32399271	17.2936	1	1	2.52051e+06	14.74	0	0	0	1	0	144	0	0	0	0	0	0	0	0	0	0	0	0	0	1	0	0	0	0	0	0	0	0	0
2018-05-13	Mauritius	12	5050	8.52734	100.745	4.6126	129.851	4.86639	145	4.98361	27590	10.2252	2.497e+07	17.0332	1265303	14.0508	1	0	2.24274e+06	14.6232	0	1	1	1	0	176	0	0	0	0	0	0	0	0	0	0	0	0	0	1	0	0	0	0	0	0	0	0	0
2018-05-16	New Zealand	13	704486	13.4652	100.745	4.6126	100.388	4.60904	66896	11.1109	607230	13.3167	2.497e+07	17.0332	4900600	15.4049	1	0	3.33103e+06	15.0188	0	1	1	1	0	179	0	0	0	0	0	0	0	0	0	0	0	0	0	1	0	0	0	0	0	0	0	0	0
2018-05-18	Philippines	14	66713	11.1082	100.745	4.6126	125.349	4.8311	4118	8.32337	246430	12.4148	2.497e+07	17.0332	108568836	18.5029	1	0	2.62019e+06	14.7788	0	1	1	1	0	140	0	0	0	0	0	0	0	0	0	0	0	0	0	1	0	0	0	0	0	0	0	0	0
2018-05-19	Qatar	15	157017	11.9641	100.745	4.6126	115.563	4.74982	0	0	1140	7.03966	2.497e+07	17.0332	2766732	14.8332	1	1	1.80914e+06	14.4084	0	0	0	1	0	154	0	0	0	0	0	0	0	0	0	0	0	0	0	1	0	0	0	0	0	0	0	0	0
2018-05-20	Singapore	16	547724	13.2135	100.745	4.6126	113.775	4.73423	10446	9.25407	72860	11.1963	2.497e+07	17.0332	5638676	15.5452	1	1	2.54598e+06	14.75	0	0	0	1	0	144	0	0	0	0	0	0	0	0	0	0	0	0	0	1	0	0	0	0	0	0	0	0	0
2018-05-21	Solomon Islands	17	8268	9.02027	100.745	4.6126	130.432	4.87085	429	6.06379	2430	7.79606	2.497e+07	17.0332	659249	13.3989	1	0	3.10584e+06	14.9488	0	1	1	1	0	140	0	0	0	0	0	0	0	0	0	0	0	0	0	1	0	0	0	0	0	0	0	0	0
2018-05-22	South Africa	18	31509	10.3581	100.745	4.6126	152.001	5.02389	11898	9.38421	181450	12.1087	2.497e+07	17.0332	57339635	17.8645	1	1	2.18742e+06	14.5982	0	0	0	1	0	140	0	0	0	0	0	0	0	0	0	0	0	0	0	1	0	0	0	0	0	0	0	0	0
2018-05-23	Sri Lanka	19	16554	9.71444	100.745	4.6126	149.178	5.00514	475	6.16542	117730	11.6762	2.497e+07	17.0332	21670000	16.8914	1	0	2.21538e+06	14.6109	0	1	1	1	0	141	0	0	0	0	0	0	0	0	0	0	0	0	0	1	0	0	0	0	0	0	0	0	0
2018-05-24	Taiwan	20	53784	10.8927	100.745	4.6126	150.531	5.01417	0	0	4300	8.3666	2.497e+07	17.0332	23726185	16.9821	1	0	2.49793e+06	14.731	0	1	1	1	0	18	0	0	0	0	0	0	0	0	0	0	0	0	0	1	0	0	0	0	0	0	0	0	0
2018-05-25	Thailand	21	150929	11.9246	100.745	4.6126	112.706	4.72478	11298	9.33247	72250	11.1879	2.497e+07	17.0332	71127802	18.08	0	1	2.38719e+06	14.6856	0	0	0	1	0	140	0	0	0	0	0	0	0	0	0	0	0	0	0	1	0	0	0	0	0	0	0	0	0
2018-05-26	Tonga	22	3344	8.11522	100.745	4.6126	126.107	4.83713	0	0	12440	9.42875	2.497e+07	17.0332	105150	11.5631	1	0	3.29898e+06	15.0091	0	1	1	1	0	140	0	0	0	0	0	0	0	0	0	0	0	0	0	1	0	0	0	0	0	0	0	0	0
2018-05-27	UK	23	125822	11.7426	100.745	4.6126	117.514	4.76656	135000	11.813	1195150	13.9938	2.497e+07	17.0332	9140169	16.0282	1	1	1.83975e+06	14.4251	0	0	1	1	0	154	0	0	0	0	0	0	0	0	0	0	0	0	0	1	0	0	0	0	0	0	0	0	0
2018-05-28	United Arab Emirates	24	576376	13.2645	100.745	4.6126	116.713	4.75972	0	0	8480	9.04558	2.497e+07	17.0332	66460344	18.0121	1	1	1.69913e+06	14.3456	0	1	0	1	0	140	0	0	0	0	0	0	0	0	0	0	0	0	0	1	0	0	0	0	0	0	0	0	0
2018-05-29	USA	25	363166	12.8026	100.745	4.6126	115.378	4.74821	93179	11.4423	104310	11.5551	2.497e+07	17.0332	326838199	19.605	1	1	2.35545e+06	14.6722	0	0	0	1	0	156	0	0	0	0	0	0	0	0	0	0	0	0	0	1	0	0	0	0	0	0	0	0	0
2018-05-31	Vietnam	26	59190	10.9885	100.745	4.6126	158.287	5.06441	205	5.32788	236750	12.3748	2.497e+07	17.0332	94914330	18.3685	1	1	2.43923e+06	14.7072	0	0	0	1	0	179	0	0	0	0	0	0	0	0	0	0	0	0	0	1	0	0	0	0	0	0	0	0	0
2018-06-01	Brunei	1	15240	9.63174	100.747	4.61261	99.145	4.59658	934	6.84055	3230	8.08055	2.497e+07	17.0332	434274	12.9814	1	1	2.6268e+06	14.7813	0	0	0	1	0	144	0	0	0	0	0	0	0	0	0	0	0	0	0	0	1	0	0	0	0	0	0	1	0
2018-06-02	Canada	2	59130	10.9875	100.747	4.61261	114.711	4.74242	24721	10.1154	51330	10.8461	2.497e+07	17.0332	37065084	17.4282	1	1	2.24219e+06	14.623	0	0	0	1	0	176	0	0	0	0	0	0	0	0	0	0	0	0	0	0	1	0	0	0	0	0	0	0	1
2018-06-03	Chile	3	44196	10.6964	100.747	4.61261	128.372	4.85494	1236	7.12044	30550	10.3272	2.497e+07	17.0332	18701450	16.7441	1	1	2.72558e+06	14.8182	0	0	0	1	0	163	0	0	0	0	0	0	0	0	0	0	0	0	0	0	1	0	0	0	0	0	0	0	0
2018-06-04	China	4	353576	12.7759	100.747	4.61261	120.553	4.79209	13286	9.49454	526040	13.1731	2.497e+07	17.0332	1402760000	21.0617	1	1	2.36518e+06	14.6764	0	0	0	1	0	18	0	0	0	0	0	0	0	0	0	0	0	0	0	0	1	0	0	0	0	0	0	0	0
2018-06-06	Fiji	5	93704	11.4479	100.747	4.61261	129.801	4.866	2144	7.67089	71800	11.1817	2.497e+07	17.0332	918996	13.731	1	0	3.25977e+06	14.9972	0	1	1	1	0	140	0	0	0	0	0	0	0	0	0	0	0	0	0	0	1	0	0	0	0	0	0	0	0
2018-06-07	Hong Kong (SAR)	6	282564	12.5517	100.747	4.61261	130.57	4.87191	9233	9.13065	96920	11.4817	2.497e+07	17.0332	7452600	15.8241	1	1	2.4499e+06	14.7116	0	0	0	1	0	144	0	0	0	0	0	0	0	0	0	0	0	0	0	0	1	0	0	0	0	0	0	0	0
2018-06-08	India	7	17920	9.79373	100.747	4.61261	165.143	5.10681	656	6.48768	468830	13.058	2.497e+07	17.0332	1369003306	21.0373	1	1	2.08445e+06	14.55	0	0	0	1	0	141	0	0	0	0	0	0	0	0	0	0	0	0	0	0	1	0	0	0	0	0	0	0	0
2018-06-09	Indonesia	8	305305	12.6291	100.747	4.61261	146.966	4.9902	11094	9.31425	83780	11.336	2.497e+07	17.0332	267066843	19.403	1	1	2.66431e+06	14.7955	0	0	0	1	0	142	0	0	0	0	0	0	0	0	0	0	0	0	0	0	1	0	0	0	0	0	0	0	0
2018-06-10	Japan	9	137403	11.8307	100.747	4.61261	104.623	4.65036	13365	9.50047	60050	11.0029	2.497e+07	17.0332	126811000	18.6582	1	0	2.52658e+06	14.7424	0	1	1	1	0	3	0	0	0	0	0	0	0	0	0	0	0	0	0	0	1	0	0	0	0	0	0	0	0
2018-06-11	Korea	10	43334	10.6767	100.747	4.61261	114.364	4.73938	5381	8.59082	106670	11.5775	2.497e+07	17.0332	25638149	17.0596	0	1	2.44391e+06	14.7091	0	0	0	1	0	141	0	0	0	0	0	0	0	0	0	0	0	0	0	0	1	0	0	0	0	0	0	0	0
2018-06-12	Malaysia	11	282980	12.5531	100.747	4.61261	119.58	4.78399	5416	8.5973	166150	12.0207	2.497e+07	17.0332	32399271	17.2936	1	1	2.52051e+06	14.74	0	0	0	1	0	144	0	0	0	0	0	0	0	0	0	0	0	0	0	0	1	0	0	0	0	0	0	0	0
2018-06-13	Mauritius	12	5234	8.56312	100.747	4.61261	128.849	4.85864	145	4.98361	27590	10.2252	2.497e+07	17.0332	1265303	14.0508	1	0	2.24274e+06	14.6232	0	1	1	1	0	176	0	0	0	0	0	0	0	0	0	0	0	0	0	0	1	0	0	0	0	0	0	0	0
2018-06-16	New Zealand	13	720728	13.488	100.747	4.61261	100.323	4.6084	66896	11.1109	607230	13.3167	2.497e+07	17.0332	4900600	15.4049	1	0	3.33103e+06	15.0188	0	1	1	1	0	179	0	0	0	0	0	0	0	0	0	0	0	0	0	0	1	0	0	0	0	0	0	0	0
2018-06-18	Philippines	14	71314	11.1749	100.747	4.61261	125.855	4.83513	4118	8.32337	246430	12.4148	2.497e+07	17.0332	108568836	18.5029	1	0	2.62019e+06	14.7788	0	1	1	1	0	140	0	0	0	0	0	0	0	0	0	0	0	0	0	0	1	0	0	0	0	0	0	0	0
2018-06-19	Qatar	15	153000	11.9382	100.747	4.61261	116.097	4.75443	0	0	1140	7.03966	2.497e+07	17.0332	2766732	14.8332	1	1	1.80914e+06	14.4084	0	0	0	1	0	154	0	0	0	0	0	0	0	0	0	0	0	0	0	0	1	0	0	0	0	0	0	0	0
2018-06-20	Singapore	16	553159	13.2234	100.747	4.61261	113.839	4.73479	10446	9.25407	72860	11.1963	2.497e+07	17.0332	5638676	15.5452	1	1	2.54598e+06	14.75	0	0	0	1	0	144	0	0	0	0	0	0	0	0	0	0	0	0	0	0	1	0	0	0	0	0	0	0	0
2018-06-21	Solomon Islands	17	7552	8.9297	100.747	4.61261	130.179	4.86891	429	6.06379	2430	7.79606	2.497e+07	17.0332	659249	13.3989	1	0	3.10584e+06	14.9488	0	1	1	1	0	140	0	0	0	0	0	0	0	0	0	0	0	0	0	0	1	0	0	0	0	0	0	0	0
2018-06-22	South Africa	18	31182	10.3476	100.747	4.61261	152.353	5.0262	11898	9.38421	181450	12.1087	2.497e+07	17.0332	57339635	17.8645	1	1	2.18742e+06	14.5982	0	0	0	1	0	140	0	0	0	0	0	0	0	0	0	0	0	0	0	0	1	0	0	0	0	0	0	0	0
2018-06-23	Sri Lanka	19	16020	9.68166	100.747	4.61261	151.818	5.02269	475	6.16542	117730	11.6762	2.497e+07	17.0332	21670000	16.8914	1	0	2.21538e+06	14.6109	0	1	1	1	0	141	0	0	0	0	0	0	0	0	0	0	0	0	0	0	1	0	0	0	0	0	0	0	0
2018-06-24	Taiwan	20	61200	11.0219	100.747	4.61261	150.531	5.01417	0	0	4300	8.3666	2.497e+07	17.0332	23726185	16.9821	1	0	2.49793e+06	14.731	0	1	1	1	0	18	0	0	0	0	0	0	0	0	0	0	0	0	0	0	1	0	0	0	0	0	0	0	0
2018-06-25	Thailand	21	149829	11.9173	100.747	4.61261	112.606	4.7239	11298	9.33247	72250	11.1879	2.497e+07	17.0332	71127802	18.08	0	1	2.38719e+06	14.6856	0	0	0	1	0	140	0	0	0	0	0	0	0	0	0	0	0	0	0	0	1	0	0	0	0	0	0	0	0
2018-06-26	Tonga	22	2816	7.94343	100.747	4.61261	126.107	4.83713	0	0	12440	9.42875	2.497e+07	17.0332	105150	11.5631	1	0	3.29898e+06	15.0091	0	1	1	1	0	140	0	0	0	0	0	0	0	0	0	0	0	0	0	0	1	0	0	0	0	0	0	0	0
2018-06-27	UK	23	119992	11.6952	100.747	4.61261	117.514	4.76656	135000	11.813	1195150	13.9938	2.497e+07	17.0332	9140169	16.0282	1	1	1.83975e+06	14.4251	0	0	1	1	0	154	0	0	0	0	0	0	0	0	0	0	0	0	0	0	1	0	0	0	0	0	0	0	0
2018-06-28	United Arab Emirates	24	549521	13.2168	100.747	4.61261	117.153	4.76348	0	0	8480	9.04558	2.497e+07	17.0332	66460344	18.0121	1	1	1.69913e+06	14.3456	0	1	0	1	0	140	0	0	0	0	0	0	0	0	0	0	0	0	0	0	1	0	0	0	0	0	0	0	0
2018-06-29	USA	25	366802	12.8126	100.747	4.61261	115.562	4.74981	93179	11.4423	104310	11.5551	2.497e+07	17.0332	326838199	19.605	1	1	2.35545e+06	14.6722	0	0	0	1	0	156	0	0	0	0	0	0	0	0	0	0	0	0	0	0	1	0	0	0	0	0	0	0	0
2018-06-30	Vietnam	26	58764	10.9813	100.747	4.61261	159.25	5.07048	205	5.32788	236750	12.3748	2.497e+07	17.0332	94914330	18.3685	1	1	2.43923e+06	14.7072	0	0	0	1	0	179	0	0	0	0	0	0	0	0	0	0	0	0	0	0	1	0	0	0	0	0	0	0	0
2018-07-03	Brunei	1	15644	9.65791	100.719	4.61234	99.4688	4.59984	934	6.84055	3230	8.08055	2.497e+07	17.0332	434274	12.9814	1	1	2.6268e+06	14.7813	0	0	0	1	0	144	0	0	0	0	0	0	0	0	0	0	0	0	0	0	0	1	0	0	0	0	0	1	0
2018-07-04	Canada	2	69584	11.1503	100.719	4.61234	115.312	4.74764	24721	10.1154	51330	10.8461	2.497e+07	17.0332	37065084	17.4282	1	1	2.24219e+06	14.623	0	0	0	1	0	176	0	0	0	0	0	0	0	0	0	0	0	0	0	0	0	1	0	0	0	0	0	0	1
2018-07-05	Chile	3	50324	10.8263	100.719	4.61234	128.824	4.85845	1236	7.12044	30550	10.3272	2.497e+07	17.0332	18701450	16.7441	1	1	2.72558e+06	14.8182	0	0	0	1	0	163	0	0	0	0	0	0	0	0	0	0	0	0	0	0	0	1	0	0	0	0	0	0	0
2018-07-06	China	4	397708	12.8935	100.719	4.61234	120.898	4.79495	13286	9.49454	526040	13.1731	2.497e+07	17.0332	1402760000	21.0617	1	1	2.36518e+06	14.6764	0	0	0	1	0	18	0	0	0	0	0	0	0	0	0	0	0	0	0	0	0	1	0	0	0	0	0	0	0
2018-07-08	Fiji	5	103319	11.5456	100.719	4.61234	130.375	4.87041	2144	7.67089	71800	11.1817	2.497e+07	17.0332	918996	13.731	1	0	3.25977e+06	14.9972	0	1	1	1	0	140	0	0	0	0	0	0	0	0	0	0	0	0	0	0	0	1	0	0	0	0	0	0	0
2018-07-09	Hong Kong (SAR)	6	330798	12.7093	100.719	4.61234	130.975	4.87501	9233	9.13065	96920	11.4817	2.497e+07	17.0332	7452600	15.8241	1	1	2.4499e+06	14.7116	0	0	0	1	0	144	0	0	0	0	0	0	0	0	0	0	0	0	0	0	0	1	0	0	0	0	0	0	0
2018-07-10	India	7	17920	9.79373	100.719	4.61234	166.693	5.11615	656	6.48768	468830	13.058	2.497e+07	17.0332	1369003306	21.0373	1	1	2.08445e+06	14.55	0	0	0	1	0	141	0	0	0	0	0	0	0	0	0	0	0	0	0	0	0	1	0	0	0	0	0	0	0
2018-07-11	Indonesia	8	316331	12.6645	100.719	4.61234	147.373	4.99296	11094	9.31425	83780	11.336	2.497e+07	17.0332	267066843	19.403	1	1	2.66431e+06	14.7955	0	0	0	1	0	142	0	0	0	0	0	0	0	0	0	0	0	0	0	0	0	1	0	0	0	0	0	0	0
2018-07-12	Japan	9	155927	11.9571	100.719	4.61234	104.623	4.65036	13365	9.50047	60050	11.0029	2.497e+07	17.0332	126811000	18.6582	1	0	2.52658e+06	14.7424	0	1	1	1	0	3	0	0	0	0	0	0	0	0	0	0	0	0	0	0	0	1	0	0	0	0	0	0	0
2018-07-13	Korea	10	44984	10.7141	100.719	4.61234	114.145	4.73747	5381	8.59082	106670	11.5775	2.497e+07	17.0332	25638149	17.0596	0	1	2.44391e+06	14.7091	0	0	0	1	0	141	0	0	0	0	0	0	0	0	0	0	0	0	0	0	0	1	0	0	0	0	0	0	0
2018-07-14	Malaysia	11	340248	12.7374	100.719	4.61234	119.78	4.78566	5416	8.5973	166150	12.0207	2.497e+07	17.0332	32399271	17.2936	1	1	2.52051e+06	14.74	0	0	0	1	0	144	0	0	0	0	0	0	0	0	0	0	0	0	0	0	0	1	0	0	0	0	0	0	0
2018-07-15	Mauritius	12	7384	8.90721	100.719	4.61234	128.598	4.85669	145	4.98361	27590	10.2252	2.497e+07	17.0332	1265303	14.0508	1	0	2.24274e+06	14.6232	0	1	1	1	0	176	0	0	0	0	0	0	0	0	0	0	0	0	0	0	0	1	0	0	0	0	0	0	0
2018-07-18	New Zealand	13	834609	13.6347	100.719	4.61234	100.259	4.60775	66896	11.1109	607230	13.3167	2.497e+07	17.0332	4900600	15.4049	1	0	3.33103e+06	15.0188	0	1	1	1	0	179	0	0	0	0	0	0	0	0	0	0	0	0	0	0	0	1	0	0	0	0	0	0	0
2018-07-20	Philippines	14	70411	11.1621	100.719	4.61234	126.868	4.84315	4118	8.32337	246430	12.4148	2.497e+07	17.0332	108568836	18.5029	1	0	2.62019e+06	14.7788	0	1	1	1	0	140	0	0	0	0	0	0	0	0	0	0	0	0	0	0	0	1	0	0	0	0	0	0	0
2018-07-21	Qatar	15	157265	11.9657	100.719	4.61234	116.322	4.75636	0	0	1140	7.03966	2.497e+07	17.0332	2766732	14.8332	1	1	1.80914e+06	14.4084	0	0	0	1	0	154	0	0	0	0	0	0	0	0	0	0	0	0	0	0	0	1	0	0	0	0	0	0	0
2018-07-22	Singapore	16	573430	13.2594	100.719	4.61234	113.672	4.73332	10446	9.25407	72860	11.1963	2.497e+07	17.0332	5638676	15.5452	1	1	2.54598e+06	14.75	0	0	0	1	0	144	0	0	0	0	0	0	0	0	0	0	0	0	0	0	0	1	0	0	0	0	0	0	0
2018-07-23	Solomon Islands	17	7792	8.96098	100.719	4.61234	130.432	4.87085	429	6.06379	2430	7.79606	2.497e+07	17.0332	659249	13.3989	1	0	3.10584e+06	14.9488	0	1	1	1	0	140	0	0	0	0	0	0	0	0	0	0	0	0	0	0	0	1	0	0	0	0	0	0	0
2018-07-24	South Africa	18	39207	10.5766	100.719	4.61234	153.585	5.03425	11898	9.38421	181450	12.1087	2.497e+07	17.0332	57339635	17.8645	1	1	2.18742e+06	14.5982	0	0	0	1	0	140	0	0	0	0	0	0	0	0	0	0	0	0	0	0	0	1	0	0	0	0	0	0	0
2018-07-25	Sri Lanka	19	16554	9.71444	100.719	4.61234	151.938	5.02348	475	6.16542	117730	11.6762	2.497e+07	17.0332	21670000	16.8914	1	0	2.21538e+06	14.6109	0	1	1	1	0	141	0	0	0	0	0	0	0	0	0	0	0	0	0	0	0	1	0	0	0	0	0	0	0
2018-07-26	Taiwan	20	68004	11.1273	100.719	4.61234	149.874	5.00979	0	0	4300	8.3666	2.497e+07	17.0332	23726185	16.9821	1	0	2.49793e+06	14.731	0	1	1	1	0	18	0	0	0	0	0	0	0	0	0	0	0	0	0	0	0	1	0	0	0	0	0	0	0
2018-07-27	Thailand	21	154547	11.9483	100.719	4.61234	112.547	4.72337	11298	9.33247	72250	11.1879	2.497e+07	17.0332	71127802	18.08	0	1	2.38719e+06	14.6856	0	0	0	1	0	140	0	0	0	0	0	0	0	0	0	0	0	0	0	0	0	1	0	0	0	0	0	0	0
2018-07-28	Tonga	22	3168	8.06117	100.719	4.61234	129.324	4.86232	0	0	12440	9.42875	2.497e+07	17.0332	105150	11.5631	1	0	3.29898e+06	15.0091	0	1	1	1	0	140	0	0	0	0	0	0	0	0	0	0	0	0	0	0	0	1	0	0	0	0	0	0	0
2018-07-29	UK	23	125979	11.7439	100.719	4.61234	117.514	4.76656	135000	11.813	1195150	13.9938	2.497e+07	17.0332	9140169	16.0282	1	1	1.83975e+06	14.4251	0	0	1	1	0	154	0	0	0	0	0	0	0	0	0	0	0	0	0	0	0	1	0	0	0	0	0	0	0
2018-07-30	United Arab Emirates	24	560723	13.237	100.719	4.61234	117.095	4.76298	0	0	8480	9.04558	2.497e+07	17.0332	66460344	18.0121	1	1	1.69913e+06	14.3456	0	1	0	1	0	140	0	0	0	0	0	0	0	0	0	0	0	0	0	0	0	1	0	0	0	0	0	0	0
2018-07-31	USA	25	377300	12.8408	100.719	4.61234	115.57	4.74987	93179	11.4423	104310	11.5551	2.497e+07	17.0332	326838199	19.605	1	1	2.35545e+06	14.6722	0	0	0	1	0	156	0	0	0	0	0	0	0	0	0	0	0	0	0	0	0	1	0	0	0	0	0	0	0
2018-07-30	Vietnam	26	61659	11.0294	100.719	4.61234	159.106	5.06957	205	5.32788	236750	12.3748	2.497e+07	17.0332	94914330	18.3685	1	1	2.43923e+06	14.7072	0	0	0	1	0	179	0	0	0	0	0	0	0	0	0	0	0	0	0	0	0	1	0	0	0	0	0	0	0
2018-08-01	Brunei	1	15540	9.65124	100.667	4.61182	99.5096	4.60025	934	6.84055	3230	8.08055	2.497e+07	17.0332	434274	12.9814	1	1	2.6268e+06	14.7813	0	0	0	1	0	144	0	0	0	0	0	0	0	0	0	0	0	0	0	0	0	0	1	0	0	0	0	1	0
2018-08-02	Canada	2	60975	11.0182	100.667	4.61182	115.226	4.7469	24721	10.1154	51330	10.8461	2.497e+07	17.0332	37065084	17.4282	1	1	2.24219e+06	14.623	0	0	0	1	0	176	0	0	0	0	0	0	0	0	0	0	0	0	0	0	0	0	1	0	0	0	0	0	1
2018-08-03	Chile	3	50020	10.8202	100.667	4.61182	129.056	4.86025	1236	7.12044	30550	10.3272	2.497e+07	17.0332	18701450	16.7441	1	1	2.72558e+06	14.8182	0	0	0	1	0	163	0	0	0	0	0	0	0	0	0	0	0	0	0	0	0	0	1	0	0	0	0	0	0
2018-08-04	China	4	391754	12.8784	100.667	4.61182	121.703	4.80158	13286	9.49454	526040	13.1731	2.497e+07	17.0332	1402760000	21.0617	1	1	2.36518e+06	14.6764	0	0	0	1	0	18	0	0	0	0	0	0	0	0	0	0	0	0	0	0	0	0	1	0	0	0	0	0	0
2018-08-06	Fiji	5	98878	11.5017	100.667	4.61182	131.111	4.87604	2144	7.67089	71800	11.1817	2.497e+07	17.0332	918996	13.731	1	0	3.25977e+06	14.9972	0	1	1	1	0	140	0	0	0	0	0	0	0	0	0	0	0	0	0	0	0	0	1	0	0	0	0	0	0
2018-08-07	Hong Kong (SAR)	6	323866	12.6881	100.667	4.61182	130.49	4.87129	9233	9.13065	96920	11.4817	2.497e+07	17.0332	7452600	15.8241	1	1	2.4499e+06	14.7116	0	0	0	1	0	144	0	0	0	0	0	0	0	0	0	0	0	0	0	0	0	0	1	0	0	0	0	0	0
2018-08-08	India	7	17920	9.79373	100.667	4.61182	167.409	5.12044	656	6.48768	468830	13.058	2.497e+07	17.0332	1369003306	21.0373	1	1	2.08445e+06	14.55	0	0	0	1	0	141	0	0	0	0	0	0	0	0	0	0	0	0	0	0	0	0	1	0	0	0	0	0	0
2018-08-09	Indonesia	8	306772	12.6339	100.667	4.61182	147.296	4.99244	11094	9.31425	83780	11.336	2.497e+07	17.0332	267066843	19.403	1	1	2.66431e+06	14.7955	0	0	0	1	0	142	0	0	0	0	0	0	0	0	0	0	0	0	0	0	0	0	1	0	0	0	0	0	0
2018-08-10	Japan	9	163516	12.0047	100.667	4.61182	105.256	4.65639	13365	9.50047	60050	11.0029	2.497e+07	17.0332	126811000	18.6582	1	0	2.52658e+06	14.7424	0	1	1	1	0	3	0	0	0	0	0	0	0	0	0	0	0	0	0	0	0	0	1	0	0	0	0	0	0
2018-08-11	Korea	10	44426	10.7016	100.667	4.61182	115.154	4.74627	5381	8.59082	106670	11.5775	2.497e+07	17.0332	25638149	17.0596	0	1	2.44391e+06	14.7091	0	0	0	1	0	141	0	0	0	0	0	0	0	0	0	0	0	0	0	0	0	0	1	0	0	0	0	0	0
2018-08-12	Malaysia	11	293626	12.5901	100.667	4.61182	119.98	4.78733	5416	8.5973	166150	12.0207	2.497e+07	17.0332	32399271	17.2936	1	1	2.52051e+06	14.74	0	0	0	1	0	144	0	0	0	0	0	0	0	0	0	0	0	0	0	0	0	0	1	0	0	0	0	0	0
2018-08-13	Mauritius	12	7672	8.94546	100.667	4.61182	127.721	4.84985	145	4.98361	27590	10.2252	2.497e+07	17.0332	1265303	14.0508	1	0	2.24274e+06	14.6232	0	1	1	1	0	176	0	0	0	0	0	0	0	0	0	0	0	0	0	0	0	0	1	0	0	0	0	0	0
2018-08-16	New Zealand	13	778421	13.565	100.667	4.61182	100.199	4.60716	66896	11.1109	607230	13.3167	2.497e+07	17.0332	4900600	15.4049	1	0	3.33103e+06	15.0188	0	1	1	1	0	179	0	0	0	0	0	0	0	0	0	0	0	0	0	0	0	0	1	0	0	0	0	0	0
2018-08-18	Philippines	14	69404	11.1477	100.667	4.61182	128.008	4.85209	4118	8.32337	246430	12.4148	2.497e+07	17.0332	108568836	18.5029	1	0	2.62019e+06	14.7788	0	1	1	1	0	140	0	0	0	0	0	0	0	0	0	0	0	0	0	0	0	0	1	0	0	0	0	0	0
2018-08-19	Qatar	15	158100	11.971	100.667	4.61182	116.642	4.75911	0	0	1140	7.03966	2.497e+07	17.0332	2766732	14.8332	1	1	1.80914e+06	14.4084	0	0	0	1	0	154	0	0	0	0	0	0	0	0	0	0	0	0	0	0	0	0	1	0	0	0	0	0	0
2018-08-20	Singapore	16	584736	13.2789	100.667	4.61182	114.152	4.73753	10446	9.25407	72860	11.1963	2.497e+07	17.0332	5638676	15.5452	1	1	2.54598e+06	14.75	0	0	0	1	0	144	0	0	0	0	0	0	0	0	0	0	0	0	0	0	0	0	1	0	0	0	0	0	0
2018-08-21	Solomon Islands	17	8064	8.99529	100.667	4.61182	130.685	4.87279	429	6.06379	2430	7.79606	2.497e+07	17.0332	659249	13.3989	1	0	3.10584e+06	14.9488	0	1	1	1	0	140	0	0	0	0	0	0	0	0	0	0	0	0	0	0	0	0	1	0	0	0	0	0	0
2018-08-22	South Africa	18	36536	10.5061	100.667	4.61182	153.409	5.0331	11898	9.38421	181450	12.1087	2.497e+07	17.0332	57339635	17.8645	1	1	2.18742e+06	14.5982	0	0	0	1	0	140	0	0	0	0	0	0	0	0	0	0	0	0	0	0	0	0	1	0	0	0	0	0	0
2018-08-23	Sri Lanka	19	16554	9.71444	100.667	4.61182	150.498	5.01395	475	6.16542	117730	11.6762	2.497e+07	17.0332	21670000	16.8914	1	0	2.21538e+06	14.6109	0	1	1	1	0	141	0	0	0	0	0	0	0	0	0	0	0	0	0	0	0	0	1	0	0	0	0	0	0
2018-08-24	Taiwan	20	62496	11.0429	100.667	4.61182	149.874	5.00979	0	0	4300	8.3666	2.497e+07	17.0332	23726185	16.9821	1	0	2.49793e+06	14.731	0	1	1	1	0	18	0	0	0	0	0	0	0	0	0	0	0	0	0	0	0	0	1	0	0	0	0	0	0
2018-08-25	Thailand	21	153114	11.9389	100.667	4.61182	112.849	4.72605	11298	9.33247	72250	11.1879	2.497e+07	17.0332	71127802	18.08	0	1	2.38719e+06	14.6856	0	0	0	1	0	140	0	0	0	0	0	0	0	0	0	0	0	0	0	0	0	0	1	0	0	0	0	0	0
2018-08-26	Tonga	22	0	0	100.667	4.61182	129.453	4.86332	0	0	12440	9.42875	2.497e+07	17.0332	105150	11.5631	1	0	3.29898e+06	15.0091	0	1	1	1	0	140	0	0	0	0	0	0	0	0	0	0	0	0	0	0	0	0	1	0	0	0	0	0	0
2018-08-27	UK	23	124796	11.7344	100.667	4.61182	118.18	4.77221	135000	11.813	1195150	13.9938	2.497e+07	17.0332	9140169	16.0282	1	1	1.83975e+06	14.4251	0	0	1	1	0	154	0	0	0	0	0	0	0	0	0	0	0	0	0	0	0	0	1	0	0	0	0	0	0
2018-08-28	United Arab Emirates	24	559482	13.2348	100.667	4.61182	117.265	4.76444	0	0	8480	9.04558	2.497e+07	17.0332	66460344	18.0121	1	1	1.69913e+06	14.3456	0	1	0	1	0	140	0	0	0	0	0	0	0	0	0	0	0	0	0	0	0	0	1	0	0	0	0	0	0
2018-08-29	USA	25	359608	12.7928	100.667	4.61182	115.634	4.75043	93179	11.4423	104310	11.5551	2.497e+07	17.0332	326838199	19.605	1	1	2.35545e+06	14.6722	0	0	0	1	0	156	0	0	0	0	0	0	0	0	0	0	0	0	0	0	0	0	1	0	0	0	0	0	0
2018-08-31	Vietnam	26	59176	10.9883	100.667	4.61182	159.825	5.07408	205	5.32788	236750	12.3748	2.497e+07	17.0332	94914330	18.3685	1	1	2.43923e+06	14.7072	0	0	0	1	0	179	0	0	0	0	0	0	0	0	0	0	0	0	0	0	0	0	1	0	0	0	0	0	0
2018-09-01	Brunei	1	16313	9.69978	100.596	4.61111	99.7242	4.60241	934	6.84055	3230	8.08055	2.497e+07	17.0332	434274	12.9814	1	1	2.6268e+06	14.7813	0	0	0	1	0	144	0	0	0	0	0	0	0	0	0	0	0	0	0	0	0	0	0	1	0	0	0	1	0
2018-09-02	Canada	2	59180	10.9884	100.596	4.61111	114.797	4.74316	24721	10.1154	51330	10.8461	2.497e+07	17.0332	37065084	17.4282	1	1	2.24219e+06	14.623	0	0	0	1	0	176	0	0	0	0	0	0	0	0	0	0	0	0	0	0	0	0	0	1	0	0	0	0	1
2018-09-03	Chile	3	46432	10.7458	100.596	4.61111	129.495	4.86364	1236	7.12044	30550	10.3272	2.497e+07	17.0332	18701450	16.7441	1	1	2.72558e+06	14.8182	0	0	0	1	0	163	0	0	0	0	0	0	0	0	0	0	0	0	0	0	0	0	0	1	0	0	0	0	0
2018-09-04	China	4	363391	12.8032	100.596	4.61111	122.507	4.80817	13286	9.49454	526040	13.1731	2.497e+07	17.0332	1402760000	21.0617	1	1	2.36518e+06	14.6764	0	0	0	1	0	18	0	0	0	0	0	0	0	0	0	0	0	0	0	0	0	0	0	1	0	0	0	0	0
2018-09-06	Fiji	5	97191	11.4844	100.596	4.61111	131.064	4.87568	2144	7.67089	71800	11.1817	2.497e+07	17.0332	918996	13.731	1	0	3.25977e+06	14.9972	0	1	1	1	0	140	0	0	0	0	0	0	0	0	0	0	0	0	0	0	0	0	0	1	0	0	0	0	0
2018-09-07	Hong Kong (SAR)	6	290227	12.5784	100.596	4.61111	131.381	4.8781	9233	9.13065	96920	11.4817	2.497e+07	17.0332	7452600	15.8241	1	1	2.4499e+06	14.7116	0	0	0	1	0	144	0	0	0	0	0	0	0	0	0	0	0	0	0	0	0	0	0	1	0	0	0	0	0
2018-09-08	India	7	17920	9.79373	100.596	4.61111	167.17	5.11901	656	6.48768	468830	13.058	2.497e+07	17.0332	1369003306	21.0373	1	1	2.08445e+06	14.55	0	0	0	1	0	141	0	0	0	0	0	0	0	0	0	0	0	0	0	0	0	0	0	1	0	0	0	0	0
2018-09-09	Indonesia	8	302534	12.62	100.596	4.61111	147.032	4.99065	11094	9.31425	83780	11.336	2.497e+07	17.0332	267066843	19.403	1	1	2.66431e+06	14.7955	0	0	0	1	0	142	0	0	0	0	0	0	0	0	0	0	0	0	0	0	0	0	0	1	0	0	0	0	0
2018-09-10	Japan	9	143348	11.873	100.596	4.61111	105.361	4.65739	13365	9.50047	60050	11.0029	2.497e+07	17.0332	126811000	18.6582	1	0	2.52658e+06	14.7424	0	1	1	1	0	3	0	0	0	0	0	0	0	0	0	0	0	0	0	0	0	0	0	1	0	0	0	0	0
2018-09-11	Korea	10	43812	10.6877	100.596	4.61111	116.033	4.75388	5381	8.59082	106670	11.5775	2.497e+07	17.0332	25638149	17.0596	0	1	2.44391e+06	14.7091	0	0	0	1	0	141	0	0	0	0	0	0	0	0	0	0	0	0	0	0	0	0	0	1	0	0	0	0	0
2018-09-12	Malaysia	11	292332	12.5856	100.596	4.61111	120.48	4.79148	5416	8.5973	166150	12.0207	2.497e+07	17.0332	32399271	17.2936	1	1	2.52051e+06	14.74	0	0	0	1	0	144	0	0	0	0	0	0	0	0	0	0	0	0	0	0	0	0	0	1	0	0	0	0	0
2018-09-13	Mauritius	12	7126	8.87165	100.596	4.61111	127.846	4.85083	145	4.98361	27590	10.2252	2.497e+07	17.0332	1265303	14.0508	1	0	2.24274e+06	14.6232	0	1	1	1	0	176	0	0	0	0	0	0	0	0	0	0	0	0	0	0	0	0	0	1	0	0	0	0	0
2018-09-16	New Zealand	13	760605	13.5419	100.596	4.61111	100.146	4.60663	66896	11.1109	607230	13.3167	2.497e+07	17.0332	4900600	15.4049	1	0	3.33103e+06	15.0188	0	1	1	1	0	179	0	0	0	0	0	0	0	0	0	0	0	0	0	0	0	0	0	1	0	0	0	0	0
2018-09-18	Philippines	14	74767	11.2221	100.596	4.61111	129.274	4.86193	4118	8.32337	246430	12.4148	2.497e+07	17.0332	108568836	18.5029	1	0	2.62019e+06	14.7788	0	1	1	1	0	140	0	0	0	0	0	0	0	0	0	0	0	0	0	0	0	0	0	1	0	0	0	0	0
2018-09-19	Qatar	15	153000	11.9382	100.596	4.61111	115.724	4.7512	0	0	1140	7.03966	2.497e+07	17.0332	2766732	14.8332	1	1	1.80914e+06	14.4084	0	0	0	1	0	154	0	0	0	0	0	0	0	0	0	0	0	0	0	0	0	0	0	1	0	0	0	0	0
2018-09-20	Singapore	16	559836	13.2354	100.596	4.61111	114.123	4.73728	10446	9.25407	72860	11.1963	2.497e+07	17.0332	5638676	15.5452	1	1	2.54598e+06	14.75	0	0	0	1	0	144	0	0	0	0	0	0	0	0	0	0	0	0	0	0	0	0	0	1	0	0	0	0	0
2018-09-21	Solomon Islands	17	7088	8.8663	100.596	4.61111	131.572	4.87955	429	6.06379	2430	7.79606	2.497e+07	17.0332	659249	13.3989	1	0	3.10584e+06	14.9488	0	1	1	1	0	140	0	0	0	0	0	0	0	0	0	0	0	0	0	0	0	0	0	1	0	0	0	0	0
2018-09-22	South Africa	18	36391	10.5021	100.596	4.61111	154.288	5.03882	11898	9.38421	181450	12.1087	2.497e+07	17.0332	57339635	17.8645	1	1	2.18742e+06	14.5982	0	0	0	1	0	140	0	0	0	0	0	0	0	0	0	0	0	0	0	0	0	0	0	1	0	0	0	0	0
2018-09-23	Sri Lanka	19	16020	9.68166	100.596	4.61111	149.298	5.00595	475	6.16542	117730	11.6762	2.497e+07	17.0332	21670000	16.8914	1	0	2.21538e+06	14.6109	0	1	1	1	0	141	0	0	0	0	0	0	0	0	0	0	0	0	0	0	0	0	0	1	0	0	0	0	0
2018-09-24	Taiwan	20	60480	11.0101	100.596	4.61111	149.874	5.00979	0	0	4300	8.3666	2.497e+07	17.0332	23726185	16.9821	1	0	2.49793e+06	14.731	0	1	1	1	0	18	0	0	0	0	0	0	0	0	0	0	0	0	0	0	0	0	0	1	0	0	0	0	0
2018-09-25	Thailand	21	149295	11.9137	100.596	4.61111	113.18	4.72898	11298	9.33247	72250	11.1879	2.497e+07	17.0332	71127802	18.08	0	1	2.38719e+06	14.6856	0	0	0	1	0	140	0	0	0	0	0	0	0	0	0	0	0	0	0	0	0	0	0	1	0	0	0	0	0
2018-09-26	Tonga	22	2816	7.94343	100.596	4.61111	128.681	4.85734	0	0	12440	9.42875	2.497e+07	17.0332	105150	11.5631	1	0	3.29898e+06	15.0091	0	1	1	1	0	140	0	0	0	0	0	0	0	0	0	0	0	0	0	0	0	0	0	1	0	0	0	0	0
2018-09-27	UK	23	121094	11.7043	100.596	4.61111	118.291	4.77315	135000	11.813	1195150	13.9938	2.497e+07	17.0332	9140169	16.0282	1	1	1.83975e+06	14.4251	0	0	1	1	0	154	0	0	0	0	0	0	0	0	0	0	0	0	0	0	0	0	0	1	0	0	0	0	0
2018-09-28	United Arab Emirates	24	551874	13.2211	100.596	4.61111	116.555	4.75837	0	0	8480	9.04558	2.497e+07	17.0332	66460344	18.0121	1	1	1.69913e+06	14.3456	0	1	0	1	0	140	0	0	0	0	0	0	0	0	0	0	0	0	0	0	0	0	0	1	0	0	0	0	0
2018-09-29	USA	25	353010	12.7743	100.596	4.61111	115.768	4.75159	93179	11.4423	104310	11.5551	2.497e+07	17.0332	326838199	19.605	1	1	2.35545e+06	14.6722	0	0	0	1	0	156	0	0	0	0	0	0	0	0	0	0	0	0	0	0	0	0	0	1	0	0	0	0	0
2018-09-30	Vietnam	26	59619	10.9957	100.596	4.61111	160.774	5.08	205	5.32788	236750	12.3748	2.497e+07	17.0332	94914330	18.3685	1	1	2.43923e+06	14.7072	0	0	0	1	0	179	0	0	0	0	0	0	0	0	0	0	0	0	0	0	0	0	0	1	0	0	0	0	0
2018-10-01	Brunei	1	17679	9.78019	100.518	4.61034	99.4492	4.59965	934	6.84055	3230	8.08055	2.497e+07	17.0332	434274	12.9814	1	1	2.6268e+06	14.7813	0	0	0	1	0	144	0	0	0	0	0	0	0	0	0	0	0	0	0	0	0	0	0	0	1	0	0	1	0
2018-10-02	Canada	2	59716	10.9974	100.518	4.61034	115.14	4.74615	24721	10.1154	51330	10.8461	2.497e+07	17.0332	37065084	17.4282	1	1	2.24219e+06	14.623	0	0	0	1	0	176	0	0	0	0	0	0	0	0	0	0	0	0	0	0	0	0	0	0	1	0	0	0	1
2018-10-03	Chile	3	56926	10.9495	100.518	4.61034	129.959	4.86722	1236	7.12044	30550	10.3272	2.497e+07	17.0332	18701450	16.7441	1	1	2.72558e+06	14.8182	0	0	0	1	0	163	0	0	0	0	0	0	0	0	0	0	0	0	0	0	0	0	0	0	1	0	0	0	0
2018-10-04	China	4	385861	12.8632	100.518	4.61034	122.737	4.81004	13286	9.49454	526040	13.1731	2.497e+07	17.0332	1402760000	21.0617	1	1	2.36518e+06	14.6764	0	0	0	1	0	18	0	0	0	0	0	0	0	0	0	0	0	0	0	0	0	0	0	0	1	0	0	0	0
2018-10-06	Fiji	5	100195	11.5149	100.518	4.61034	131.867	4.88179	2144	7.67089	71800	11.1817	2.497e+07	17.0332	918996	13.731	1	0	3.25977e+06	14.9972	0	1	1	1	0	140	0	0	0	0	0	0	0	0	0	0	0	0	0	0	0	0	0	0	1	0	0	0	0
2018-10-07	Hong Kong (SAR)	6	313232	12.6547	100.518	4.61034	131.651	4.88016	9233	9.13065	96920	11.4817	2.497e+07	17.0332	7452600	15.8241	1	1	2.4499e+06	14.7116	0	0	0	1	0	144	0	0	0	0	0	0	0	0	0	0	0	0	0	0	0	0	0	0	1	0	0	0	0
2018-10-08	India	7	17920	9.79373	100.518	4.61034	167.647	5.12186	656	6.48768	468830	13.058	2.497e+07	17.0332	1369003306	21.0373	1	1	2.08445e+06	14.55	0	0	0	1	0	141	0	0	0	0	0	0	0	0	0	0	0	0	0	0	0	0	0	0	1	0	0	0	0
2018-10-09	Indonesia	8	324205	12.6891	100.518	4.61034	147.439	4.99341	11094	9.31425	83780	11.336	2.497e+07	17.0332	267066843	19.403	1	1	2.66431e+06	14.7955	0	0	0	1	0	142	0	0	0	0	0	0	0	0	0	0	0	0	0	0	0	0	0	0	1	0	0	0	0
2018-10-10	Japan	9	154376	11.9472	100.518	4.61034	105.678	4.66039	13365	9.50047	60050	11.0029	2.497e+07	17.0332	126811000	18.6582	1	0	2.52658e+06	14.7424	0	1	1	1	0	3	0	0	0	0	0	0	0	0	0	0	0	0	0	0	0	0	0	0	1	0	0	0	0
2018-10-11	Korea	10	45864	10.7335	100.518	4.61034	115.825	4.75208	5381	8.59082	106670	11.5775	2.497e+07	17.0332	25638149	17.0596	0	1	2.44391e+06	14.7091	0	0	0	1	0	141	0	0	0	0	0	0	0	0	0	0	0	0	0	0	0	0	0	0	1	0	0	0	0
2018-10-12	Malaysia	11	295330	12.5959	100.518	4.61034	120.68	4.79314	5416	8.5973	166150	12.0207	2.497e+07	17.0332	32399271	17.2936	1	1	2.52051e+06	14.74	0	0	0	1	0	144	0	0	0	0	0	0	0	0	0	0	0	0	0	0	0	0	0	0	1	0	0	0	0
2018-10-13	Mauritius	12	7126	8.87165	100.518	4.61034	128.347	4.85474	145	4.98361	27590	10.2252	2.497e+07	17.0332	1265303	14.0508	1	0	2.24274e+06	14.6232	0	1	1	1	0	176	0	0	0	0	0	0	0	0	0	0	0	0	0	0	0	0	0	0	1	0	0	0	0
2018-10-16	New Zealand	13	807092	13.6012	100.518	4.61034	100.097	4.60613	66896	11.1109	607230	13.3167	2.497e+07	17.0332	4900600	15.4049	1	0	3.33103e+06	15.0188	0	1	1	1	0	179	0	0	0	0	0	0	0	0	0	0	0	0	0	0	0	0	0	0	1	0	0	0	0
2018-10-18	Philippines	14	75388	11.2304	100.518	4.61034	129.527	4.86389	4118	8.32337	246430	12.4148	2.497e+07	17.0332	108568836	18.5029	1	0	2.62019e+06	14.7788	0	1	1	1	0	140	0	0	0	0	0	0	0	0	0	0	0	0	0	0	0	0	0	0	1	0	0	0	0
2018-10-19	Qatar	15	157066	11.9644	100.518	4.61034	115.809	4.75194	0	0	1140	7.03966	2.497e+07	17.0332	2766732	14.8332	1	1	1.80914e+06	14.4084	0	0	0	1	0	154	0	0	0	0	0	0	0	0	0	0	0	0	0	0	0	0	0	0	1	0	0	0	0
2018-10-20	Singapore	16	569259	13.2521	100.518	4.61034	113.773	4.73421	10446	9.25407	72860	11.1963	2.497e+07	17.0332	5638676	15.5452	1	1	2.54598e+06	14.75	0	0	0	1	0	144	0	0	0	0	0	0	0	0	0	0	0	0	0	0	0	0	0	0	1	0	0	0	0
2018-10-21	Solomon Islands	17	7928	8.97828	100.518	4.61034	131.319	4.87763	429	6.06379	2430	7.79606	2.497e+07	17.0332	659249	13.3989	1	0	3.10584e+06	14.9488	0	1	1	1	0	140	0	0	0	0	0	0	0	0	0	0	0	0	0	0	0	0	0	0	1	0	0	0	0
2018-10-22	South Africa	18	36594	10.5077	100.518	4.61034	154.992	5.04337	11898	9.38421	181450	12.1087	2.497e+07	17.0332	57339635	17.8645	1	1	2.18742e+06	14.5982	0	0	0	1	0	140	0	0	0	0	0	0	0	0	0	0	0	0	0	0	0	0	0	0	1	0	0	0	0
2018-10-23	Sri Lanka	19	16554	9.71444	100.518	4.61034	149.898	5.00996	475	6.16542	117730	11.6762	2.497e+07	17.0332	21670000	16.8914	1	0	2.21538e+06	14.6109	0	1	1	1	0	141	0	0	0	0	0	0	0	0	0	0	0	0	0	0	0	0	0	0	1	0	0	0	0
2018-10-24	Taiwan	20	58140	10.9706	100.518	4.61034	155.404	5.04603	0	0	4300	8.3666	2.497e+07	17.0332	23726185	16.9821	1	0	2.49793e+06	14.731	0	1	1	1	0	18	0	0	0	0	0	0	0	0	0	0	0	0	0	0	0	0	0	0	1	0	0	0	0
2018-10-25	Thailand	21	151014	11.9251	100.518	4.61034	113.246	4.72957	11298	9.33247	72250	11.1879	2.497e+07	17.0332	71127802	18.08	0	1	2.38719e+06	14.6856	0	0	0	1	0	140	0	0	0	0	0	0	0	0	0	0	0	0	0	0	0	0	0	0	1	0	0	0	0
2018-10-26	Tonga	22	3344	8.11522	100.518	4.61034	129.582	4.86431	0	0	12440	9.42875	2.497e+07	17.0332	105150	11.5631	1	0	3.29898e+06	15.0091	0	1	1	1	0	140	0	0	0	0	0	0	0	0	0	0	0	0	0	0	0	0	0	0	1	0	0	0	0
2018-10-27	UK	23	124989	11.736	100.518	4.61034	118.402	4.77409	135000	11.813	1195150	13.9938	2.497e+07	17.0332	9140169	16.0282	1	1	1.83975e+06	14.4251	0	0	1	1	0	154	0	0	0	0	0	0	0	0	0	0	0	0	0	0	0	0	0	0	1	0	0	0	0
2018-10-28	United Arab Emirates	24	548262	13.2145	100.518	4.61034	115.999	4.75358	0	0	8480	9.04558	2.497e+07	17.0332	66460344	18.0121	1	1	1.69913e+06	14.3456	0	1	0	1	0	140	0	0	0	0	0	0	0	0	0	0	0	0	0	0	0	0	0	0	1	0	0	0	0
2018-10-29	USA	25	360843	12.7962	100.518	4.61034	115.973	4.75336	93179	11.4423	104310	11.5551	2.497e+07	17.0332	326838199	19.605	1	1	2.35545e+06	14.6722	0	0	0	1	0	156	0	0	0	0	0	0	0	0	0	0	0	0	0	0	0	0	0	0	1	0	0	0	0
2018-10-31	Vietnam	26	61138	11.0209	100.518	4.61034	161.307	5.08331	205	5.32788	236750	12.3748	2.497e+07	17.0332	94914330	18.3685	1	1	2.43923e+06	14.7072	0	0	0	1	0	179	0	0	0	0	0	0	0	0	0	0	0	0	0	0	0	0	0	0	1	0	0	0	0
2018-11-01	Brunei	1	15404	9.64245	100.445	4.60961	99.3381	4.59853	934	6.84055	3230	8.08055	2.497e+07	17.0332	434274	12.9814	1	1	2.6268e+06	14.7813	0	0	0	1	0	144	0	0	0	0	0	0	0	0	0	0	0	0	0	0	0	0	0	0	0	1	0	1	0
2018-11-02	Canada	2	56793	10.9472	100.445	4.60961	114.625	4.74167	24721	10.1154	51330	10.8461	2.497e+07	17.0332	37065084	17.4282	1	1	2.24219e+06	14.623	0	0	0	1	0	176	0	0	0	0	0	0	0	0	0	0	0	0	0	0	0	0	0	0	0	1	0	0	1
2018-11-03	Chile	3	55527	10.9246	100.445	4.60961	129.959	4.86722	1236	7.12044	30550	10.3272	2.497e+07	17.0332	18701450	16.7441	1	1	2.72558e+06	14.8182	0	0	0	1	0	163	0	0	0	0	0	0	0	0	0	0	0	0	0	0	0	0	0	0	0	1	0	0	0
2018-11-04	China	4	401485	12.9029	100.445	4.60961	122.277	4.80629	13286	9.49454	526040	13.1731	2.497e+07	17.0332	1402760000	21.0617	1	1	2.36518e+06	14.6764	0	0	0	1	0	18	0	0	0	0	0	0	0	0	0	0	0	0	0	0	0	0	0	0	0	1	0	0	0
2018-11-06	Fiji	5	88382	11.3894	100.445	4.60961	131.408	4.87831	2144	7.67089	71800	11.1817	2.497e+07	17.0332	918996	13.731	1	0	3.25977e+06	14.9972	0	1	1	1	0	140	0	0	0	0	0	0	0	0	0	0	0	0	0	0	0	0	0	0	0	1	0	0	0
2018-11-07	Hong Kong (SAR)	6	284861	12.5598	100.445	4.60961	131.922	4.88221	9233	9.13065	96920	11.4817	2.497e+07	17.0332	7452600	15.8241	1	1	2.4499e+06	14.7116	0	0	0	1	0	144	0	0	0	0	0	0	0	0	0	0	0	0	0	0	0	0	0	0	0	1	0	0	0
2018-11-08	India	7	17408	9.76474	100.445	4.60961	167.885	5.12328	656	6.48768	468830	13.058	2.497e+07	17.0332	1369003306	21.0373	1	1	2.08445e+06	14.55	0	0	0	1	0	141	0	0	0	0	0	0	0	0	0	0	0	0	0	0	0	0	0	0	0	1	0	0	0
2018-11-09	Indonesia	8	293977	12.5913	100.445	4.60961	147.834	4.99609	11094	9.31425	83780	11.336	2.497e+07	17.0332	267066843	19.403	1	1	2.66431e+06	14.7955	0	0	0	1	0	142	0	0	0	0	0	0	0	0	0	0	0	0	0	0	0	0	0	0	0	1	0	0	0
2018-11-10	Japan	9	146678	11.896	100.445	4.60961	105.467	4.6584	13365	9.50047	60050	11.0029	2.497e+07	17.0332	126811000	18.6582	1	0	2.52658e+06	14.7424	0	1	1	1	0	3	0	0	0	0	0	0	0	0	0	0	0	0	0	0	0	0	0	0	0	1	0	0	0
2018-11-11	Korea	10	65418	11.0886	100.445	4.60961	115.002	4.74495	5381	8.59082	106670	11.5775	2.497e+07	17.0332	25638149	17.0596	0	1	2.44391e+06	14.7091	0	0	0	1	0	141	0	0	0	0	0	0	0	0	0	0	0	0	0	0	0	0	0	0	0	1	0	0	0
2018-11-12	Malaysia	11	295620	12.5968	100.445	4.60961	120.98	4.79562	5416	8.5973	166150	12.0207	2.497e+07	17.0332	32399271	17.2936	1	1	2.52051e+06	14.74	0	0	0	1	0	144	0	0	0	0	0	0	0	0	0	0	0	0	0	0	0	0	0	0	0	1	0	0	0
2018-11-13	Mauritius	12	4484	8.40849	100.445	4.60961	128.849	4.85864	145	4.98361	27590	10.2252	2.497e+07	17.0332	1265303	14.0508	1	0	2.24274e+06	14.6232	0	1	1	1	0	176	0	0	0	0	0	0	0	0	0	0	0	0	0	0	0	0	0	0	0	1	0	0	0
2018-11-16	New Zealand	13	806789	13.6008	100.445	4.60961	100.042	4.60559	66896	11.1109	607230	13.3167	2.497e+07	17.0332	4900600	15.4049	1	0	3.33103e+06	15.0188	0	1	1	1	0	179	0	0	0	0	0	0	0	0	0	0	0	0	0	0	0	0	0	0	0	1	0	0	0
2018-11-18	Philippines	14	75454	11.2313	100.445	4.60961	129.147	4.86095	4118	8.32337	246430	12.4148	2.497e+07	17.0332	108568836	18.5029	1	0	2.62019e+06	14.7788	0	1	1	1	0	140	0	0	0	0	0	0	0	0	0	0	0	0	0	0	0	0	0	0	0	1	0	0	0
2018-11-19	Qatar	15	152520	11.9351	100.445	4.60961	115.894	4.75268	0	0	1140	7.03966	2.497e+07	17.0332	2766732	14.8332	1	1	1.80914e+06	14.4084	0	0	0	1	0	154	0	0	0	0	0	0	0	0	0	0	0	0	0	0	0	0	0	0	0	1	0	0	0
2018-11-20	Singapore	16	553460	13.2239	100.445	4.60961	113.96	4.73584	10446	9.25407	72860	11.1963	2.497e+07	17.0332	5638676	15.5452	1	1	2.54598e+06	14.75	0	0	0	1	0	144	0	0	0	0	0	0	0	0	0	0	0	0	0	0	0	0	0	0	0	1	0	0	0
2018-11-21	Solomon Islands	17	9016	9.10687	100.445	4.60961	131.699	4.88052	429	6.06379	2430	7.79606	2.497e+07	17.0332	659249	13.3989	1	0	3.10584e+06	14.9488	0	1	1	1	0	140	0	0	0	0	0	0	0	0	0	0	0	0	0	0	0	0	0	0	0	1	0	0	0
2018-11-22	South Africa	18	32082	10.3761	100.445	4.60961	155.168	5.04451	11898	9.38421	181450	12.1087	2.497e+07	17.0332	57339635	17.8645	1	1	2.18742e+06	14.5982	0	0	0	1	0	140	0	0	0	0	0	0	0	0	0	0	0	0	0	0	0	0	0	0	0	1	0	0	0
2018-11-23	Sri Lanka	19	17580	9.77457	100.445	4.60961	153.259	5.03213	475	6.16542	117730	11.6762	2.497e+07	17.0332	21670000	16.8914	1	0	2.21538e+06	14.6109	0	1	1	1	0	141	0	0	0	0	0	0	0	0	0	0	0	0	0	0	0	0	0	0	0	1	0	0	0
2018-11-24	Taiwan	20	53268	10.8831	100.445	4.60961	155.404	5.04603	0	0	4300	8.3666	2.497e+07	17.0332	23726185	16.9821	1	0	2.49793e+06	14.731	0	1	1	1	0	18	0	0	0	0	0	0	0	0	0	0	0	0	0	0	0	0	0	0	0	1	0	0	0
2018-11-25	Thailand	21	125125	11.7371	100.445	4.60961	112.993	4.72732	11298	9.33247	72250	11.1879	2.497e+07	17.0332	71127802	18.08	0	1	2.38719e+06	14.6856	0	0	0	1	0	140	0	0	0	0	0	0	0	0	0	0	0	0	0	0	0	0	0	0	0	1	0	0	0
2018-11-26	Tonga	22	2992	8.00403	100.445	4.60961	129.067	4.86033	0	0	12440	9.42875	2.497e+07	17.0332	105150	11.5631	1	0	3.29898e+06	15.0091	0	1	1	1	0	140	0	0	0	0	0	0	0	0	0	0	0	0	0	0	0	0	0	0	0	1	0	0	0
2018-11-27	UK	23	121931	11.7112	100.445	4.60961	118.624	4.77596	135000	11.813	1195150	13.9938	2.497e+07	17.0332	9140169	16.0282	1	1	1.83975e+06	14.4251	0	0	1	1	0	154	0	0	0	0	0	0	0	0	0	0	0	0	0	0	0	0	0	0	0	1	0	0	0
2018-11-28	United Arab Emirates	24	490532	13.1032	100.445	4.60961	115.655	4.75061	0	0	8480	9.04558	2.497e+07	17.0332	66460344	18.0121	1	1	1.69913e+06	14.3456	0	1	0	1	0	140	0	0	0	0	0	0	0	0	0	0	0	0	0	0	0	0	0	0	0	1	0	0	0
2018-11-29	USA	25	347898	12.7597	100.445	4.60961	115.584	4.75	93179	11.4423	104310	11.5551	2.497e+07	17.0332	326838199	19.605	1	1	2.35545e+06	14.6722	0	0	0	1	0	156	0	0	0	0	0	0	0	0	0	0	0	0	0	0	0	0	0	0	0	1	0	0	0
2018-11-28	Vietnam	26	57396	10.9577	100.445	4.60961	160.842	5.08042	205	5.32788	236750	12.3748	2.497e+07	17.0332	94914330	18.3685	1	1	2.43923e+06	14.7072	0	0	0	1	0	179	0	0	0	0	0	0	0	0	0	0	0	0	0	0	0	0	0	0	0	1	0	0	0
2018-12-01	Brunei	1	15748	9.66453	100.383	4.60899	99.1632	4.59677	934	6.84055	3230	8.08055	2.497e+07	17.0332	434274	12.9814	1	1	2.6268e+06	14.7813	0	0	0	1	0	144	0	0	0	0	0	0	0	0	0	0	0	0	0	0	0	0	0	0	0	0	1	1	0
2018-12-22	Canada	2	69932	11.1553	100.383	4.60899	114.539	4.74092	24721	10.1154	51330	10.8461	2.497e+07	17.0332	37065084	17.4282	1	1	2.24219e+06	14.623	0	0	0	1	0	176	0	0	0	0	0	0	0	0	0	0	0	0	0	0	0	0	0	0	0	0	1	0	1
2018-12-23	Chile	3	58518	10.9771	100.383	4.60899	129.83	4.86623	1236	7.12044	30550	10.3272	2.497e+07	17.0332	18701450	16.7441	1	1	2.72558e+06	14.8182	0	0	0	1	0	163	0	0	0	0	0	0	0	0	0	0	0	0	0	0	0	0	0	0	0	0	1	0	0
2018-12-24	China	4	479200	13.0799	100.383	4.60899	122.392	4.80723	13286	9.49454	526040	13.1731	2.497e+07	17.0332	1402760000	21.0617	1	1	2.36518e+06	14.6764	0	0	0	1	0	18	0	0	0	0	0	0	0	0	0	0	0	0	0	0	0	0	0	0	0	0	1	0	0
2018-12-26	Fiji	5	102070	11.5334	100.383	4.60899	131.523	4.87918	2144	7.67089	71800	11.1817	2.497e+07	17.0332	918996	13.731	1	0	3.25977e+06	14.9972	0	1	1	1	0	140	0	0	0	0	0	0	0	0	0	0	0	0	0	0	0	0	0	0	0	0	1	0	0
2018-12-27	Hong Kong (SAR)	6	316649	12.6656	100.383	4.60899	132.327	4.88528	9233	9.13065	96920	11.4817	2.497e+07	17.0332	7452600	15.8241	1	1	2.4499e+06	14.7116	0	0	0	1	0	144	0	0	0	0	0	0	0	0	0	0	0	0	0	0	0	0	0	0	0	0	1	0	0
2018-12-28	India	7	18432	9.8219	100.383	4.60899	167.051	5.1183	656	6.48768	468830	13.058	2.497e+07	17.0332	1369003306	21.0373	1	1	2.08445e+06	14.55	0	0	0	1	0	141	0	0	0	0	0	0	0	0	0	0	0	0	0	0	0	0	0	0	0	0	1	0	0
2018-12-29	Indonesia	8	332710	12.715	100.383	4.60899	148.746	5.00224	11094	9.31425	83780	11.336	2.497e+07	17.0332	267066843	19.403	1	1	2.66431e+06	14.7955	0	0	0	1	0	142	0	0	0	0	0	0	0	0	0	0	0	0	0	0	0	0	0	0	0	0	1	0	0
2018-12-30	Japan	9	161756	11.9939	100.383	4.60899	105.15	4.65539	13365	9.50047	60050	11.0029	2.497e+07	17.0332	126811000	18.6582	1	0	2.52658e+06	14.7424	0	1	1	1	0	3	0	0	0	0	0	0	0	0	0	0	0	0	0	0	0	0	0	0	0	0	1	0	0
2018-12-31	Korea	10	72602	11.1928	100.383	4.60899	114.606	4.7415	5381	8.59082	106670	11.5775	2.497e+07	17.0332	25638149	17.0596	0	1	2.44391e+06	14.7091	0	0	0	1	0	141	0	0	0	0	0	0	0	0	0	0	0	0	0	0	0	0	0	0	0	0	1	0	0
2018-12-20	Malaysia	11	336736	12.7271	100.383	4.60899	121.08	4.79645	5416	8.5973	166150	12.0207	2.497e+07	17.0332	32399271	17.2936	1	1	2.52051e+06	14.74	0	0	0	1	0	144	0	0	0	0	0	0	0	0	0	0	0	0	0	0	0	0	0	0	0	0	1	0	0
2018-12-21	Mauritius	12	7202	8.88225	100.383	4.60899	128.347	4.85474	145	4.98361	27590	10.2252	2.497e+07	17.0332	1265303	14.0508	1	0	2.24274e+06	14.6232	0	1	1	1	0	176	0	0	0	0	0	0	0	0	0	0	0	0	0	0	0	0	0	0	0	0	1	0	0
2018-12-24	New Zealand	13	911472	13.7228	100.383	4.60899	99.9784	4.60495	66896	11.1109	607230	13.3167	2.497e+07	17.0332	4900600	15.4049	1	0	3.33103e+06	15.0188	0	1	1	1	0	179	0	0	0	0	0	0	0	0	0	0	0	0	0	0	0	0	0	0	0	0	1	0	0
2018-12-26	Philippines	14	95464	11.4665	100.383	4.60899	128.388	4.85505	4118	8.32337	246430	12.4148	2.497e+07	17.0332	108568836	18.5029	1	0	2.62019e+06	14.7788	0	1	1	1	0	140	0	0	0	0	0	0	0	0	0	0	0	0	0	0	0	0	0	0	0	0	1	0	0
2018-12-27	Qatar	15	157384	11.9665	100.383	4.60899	116.012	4.75369	0	0	1140	7.03966	2.497e+07	17.0332	2766732	14.8332	1	1	1.80914e+06	14.4084	0	0	0	1	0	154	0	0	0	0	0	0	0	0	0	0	0	0	0	0	0	0	0	0	0	0	1	0	0
2018-12-20	Singapore	16	591484	13.2904	100.383	4.60899	114.047	4.73661	10446	9.25407	72860	11.1963	2.497e+07	17.0332	5638676	15.5452	1	1	2.54598e+06	14.75	0	0	0	1	0	144	0	0	0	0	0	0	0	0	0	0	0	0	0	0	0	0	0	0	0	0	1	0	0
2018-12-21	Solomon Islands	17	8584	9.05777	100.383	4.60899	131.825	4.88148	429	6.06379	2430	7.79606	2.497e+07	17.0332	659249	13.3989	1	0	3.10584e+06	14.9488	0	1	1	1	0	140	0	0	0	0	0	0	0	0	0	0	0	0	0	0	0	0	0	0	0	0	1	0	0
2018-12-22	South Africa	18	37598	10.5347	100.383	4.60899	154.992	5.04337	11898	9.38421	181450	12.1087	2.497e+07	17.0332	57339635	17.8645	1	1	2.18742e+06	14.5982	0	0	0	1	0	140	0	0	0	0	0	0	0	0	0	0	0	0	0	0	0	0	0	0	0	0	1	0	0
2018-12-23	Sri Lanka	19	18166	9.80736	100.383	4.60899	152.539	5.02742	475	6.16542	117730	11.6762	2.497e+07	17.0332	21670000	16.8914	1	0	2.21538e+06	14.6109	0	1	1	1	0	141	0	0	0	0	0	0	0	0	0	0	0	0	0	0	0	0	0	0	0	0	1	0	0
2018-12-24	Taiwan	20	78148	11.2664	100.383	4.60899	155.404	5.04603	0	0	4300	8.3666	2.497e+07	17.0332	23726185	16.9821	1	0	2.49793e+06	14.731	0	1	1	1	0	18	0	0	0	0	0	0	0	0	0	0	0	0	0	0	0	0	0	0	0	0	1	0	0
2018-12-25	Thailand	21	130099	11.7761	100.383	4.60899	112.253	4.72076	11298	9.33247	72250	11.1879	2.497e+07	17.0332	71127802	18.08	0	1	2.38719e+06	14.6856	0	0	0	1	0	140	0	0	0	0	0	0	0	0	0	0	0	0	0	0	0	0	0	0	0	0	1	0	0
2018-12-26	Tonga	22	2992	8.00403	100.383	4.60899	127.909	4.85132	0	0	12440	9.42875	2.497e+07	17.0332	105150	11.5631	1	0	3.29898e+06	15.0091	0	1	1	1	0	140	0	0	0	0	0	0	0	0	0	0	0	0	0	0	0	0	0	0	0	0	1	0	0
2018-12-27	UK	23	125139	11.7372	100.383	4.60899	118.846	4.77783	135000	11.813	1195150	13.9938	2.497e+07	17.0332	9140169	16.0282	1	1	1.83975e+06	14.4251	0	0	1	1	0	154	0	0	0	0	0	0	0	0	0	0	0	0	0	0	0	0	0	0	0	0	1	0	0
2018-12-20	United Arab Emirates	24	554252	13.2254	100.383	4.60899	115.3	4.74754	0	0	8480	9.04558	2.497e+07	17.0332	66460344	18.0121	1	1	1.69913e+06	14.3456	0	1	0	1	0	140	0	0	0	0	0	0	0	0	0	0	0	0	0	0	0	0	0	0	0	0	1	0	0
2018-12-21	USA	25	373598	12.8309	100.383	4.60899	115.215	4.7468	93179	11.4423	104310	11.5551	2.497e+07	17.0332	326838199	19.605	1	1	2.35545e+06	14.6722	0	0	0	1	0	156	0	0	0	0	0	0	0	0	0	0	0	0	0	0	0	0	0	0	0	0	1	0	0
2018-12-23	Vietnam	26	61325	11.024	100.383	4.60899	160.434	5.07788	205	5.32788	236750	12.3748	2.497e+07	17.0332	94914330	18.3685	1	1	2.43923e+06	14.7072	0	0	0	1	0	179	0	0	0	0	0	0	0	0	0	0	0	0	0	0	0	0	0	0	0	0	1	0	0
2019-01-01	Brunei	1	15748	9.66453	100.335	4.60852	98.9524	4.59464	1672621	14.3299	7844.14	8.96765	25340000	17.0479	438048	12.9901	1	1	2.6268e+06	14.7813	0	0	0	1	0	144	0	0	0	0	0	0	0	0	0	1	0	0	0	0	0	0	0	0	0	0	0	1	0
2019-01-02	Canada	2	71737	11.1808	100.335	4.60852	114.711	4.74242	44270737	17.6058	8969060	16.0093	25340000	17.0479	37601230	17.4425	1	1	2.24219e+06	14.623	0	0	0	1	0	176	0	0	0	0	0	0	0	0	0	1	0	0	0	0	0	0	0	0	0	0	0	0	1
2019-01-03	Chile	3	65620	11.0917	100.335	4.60852	129.972	4.86732	2213447	14.6101	630322	13.354	25340000	17.0479	19039485	16.762	1	1	2.72558e+06	14.8182	0	0	0	1	0	163	0	0	0	0	0	0	0	0	0	1	0	0	0	0	0	0	0	0	0	0	0	0	0
2019-01-04	China	4	509147	13.1405	100.335	4.60852	122.967	4.81191	23792768	16.9849	11902820	16.2923	25340000	17.0479	1407745000	21.0653	1	1	2.36518e+06	14.6764	0	0	0	1	0	18	0	0	0	0	0	0	0	0	0	1	0	0	0	0	0	0	0	0	0	0	0	0	0
2019-01-06	Fiji	5	101109	11.524	100.335	4.60852	133.129	4.89132	3839507	15.1609	22123.6	10.0044	25340000	17.0479	918465	13.7305	1	0	3.25977e+06	14.9972	0	1	1	1	0	140	0	0	0	0	0	0	0	0	0	1	0	0	0	0	0	0	0	0	0	0	0	0	0
2019-01-07	Hong Kong (SAR)	6	311212	12.6482	100.335	4.60852	132.192	4.88425	16534595	16.621	6259222	15.6496	25340000	17.0479	7507900	15.8315	1	1	2.4499e+06	14.7116	0	0	0	1	0	144	0	0	0	0	0	0	0	0	0	1	0	0	0	0	0	0	0	0	0	0	0	0	0
2019-01-08	India	7	17920	9.79373	100.335	4.60852	166.455	5.11472	1174775	13.9766	53045516	17.7867	25340000	17.0479	1383112050	21.0476	1	1	2.08445e+06	14.55	0	0	0	1	0	141	0	0	0	0	0	0	0	0	0	1	0	0	0	0	0	0	0	0	0	0	0	0	0
2019-01-09	Indonesia	8	330949	12.7097	100.335	4.60852	149.229	5.00548	19867301	16.8046	649393	13.3838	25340000	17.0479	269582878	19.4124	1	1	2.66431e+06	14.7955	0	0	0	1	0	142	0	0	0	0	0	0	0	0	0	1	0	0	0	0	0	0	0	0	0	0	0	0	0
2019-01-10	Japan	9	166847	12.0248	100.335	4.60852	105.15	4.65539	23934242	16.9908	3293723	15.0075	25340000	17.0479	126633000	18.6568	1	0	2.52658e+06	14.7424	0	1	1	1	0	3	0	0	0	0	0	0	0	0	0	1	0	0	0	0	0	0	0	0	0	0	0	0	0
2019-01-11	Korea	10	72602	11.1928	100.335	4.60852	114.485	4.74045	9636375	16.0811	2724541	14.8178	25340000	17.0479	25755441	17.0642	0	1	2.44391e+06	14.7091	0	0	0	1	0	141	0	0	0	0	0	0	0	0	0	1	0	0	0	0	0	0	0	0	0	0	0	0	0
2019-01-12	Malaysia	11	325643	12.6936	100.335	4.60852	120.48	4.79148	9699054	16.0875	12510347	16.3421	25340000	17.0479	32804020	17.3061	1	1	2.52051e+06	14.74	0	0	0	1	0	144	0	0	0	0	0	0	0	0	0	1	0	0	0	0	0	0	0	0	0	0	0	0	0
2019-01-13	Mauritius	12	7148	8.87473	100.335	4.60852	130.102	4.86832	259668	12.4672	17470.7	9.76834	25340000	17.0479	1265711	14.0511	1	0	2.24274e+06	14.6232	0	1	1	1	0	176	0	0	0	0	0	0	0	0	0	1	0	0	0	0	0	0	0	0	0	0	0	0	0
2019-01-16	New Zealand	13	942868	13.7567	100.335	4.60852	99.9046	4.60422	119798357	18.6013	14244646	16.4719	25340000	17.0479	4979200	15.4208	1	0	3.33103e+06	15.0188	0	1	1	1	0	179	0	0	0	0	0	0	0	0	0	1	0	0	0	0	0	0	0	0	0	0	0	0	0
2019-01-18	Philippines	14	100130	11.5142	100.335	4.60852	128.514	4.85604	7374576	15.8135	1182038	13.9828	25340000	17.0479	110380804	18.5194	1	0	2.62019e+06	14.7788	0	1	1	1	0	140	0	0	0	0	0	0	0	0	0	1	0	0	0	0	0	0	0	0	0	0	0	0	0
2019-01-19	Qatar	15	157604	11.9678	100.335	4.60852	114.89	4.74398	0	0	55792.5	10.9294	25340000	17.0479	2807235	14.8477	1	1	1.80914e+06	14.4084	0	0	0	1	0	154	0	0	0	0	0	0	0	0	0	1	0	0	0	0	0	0	0	0	0	0	0	0	0
2019-01-20	Singapore	16	604054	13.3114	100.335	4.60852	113.704	4.7336	18706853	16.7444	3447425	15.0531	25340000	17.0479	5703569	15.5566	1	1	2.54598e+06	14.75	0	0	0	1	0	144	0	0	0	0	0	0	0	0	0	1	0	0	0	0	0	0	0	0	0	0	0	0	0
2019-01-21	Solomon Islands	17	9096	9.1157	100.335	4.60852	132.332	4.88531	768260	13.5519	135.051	4.91303	25340000	17.0479	674993	13.4225	1	0	3.10584e+06	14.9488	0	1	1	1	0	140	0	0	0	0	0	0	0	0	0	1	0	0	0	0	0	0	0	0	0	0	0	0	0
2019-01-22	South Africa	18	37380	10.5289	100.335	4.60852	154.816	5.04224	21307116	16.8746	16824183	16.6383	25340000	17.0479	58087055	17.8775	1	1	2.18742e+06	14.5982	0	0	0	1	0	140	0	0	0	0	0	0	0	0	0	1	0	0	0	0	0	0	0	0	0	0	0	0	0
2019-01-23	Sri Lanka	19	18166	9.80736	100.335	4.60852	152.779	5.02899	850637	13.6537	103412	11.5465	25340000	17.0479	21803000	16.8976	1	0	2.21538e+06	14.6109	0	1	1	1	0	141	0	0	0	0	0	0	0	0	0	1	0	0	0	0	0	0	0	0	0	0	0	0	0
2019-01-24	Taiwan	20	76930	11.2507	100.335	4.60852	148.523	5.00074	0	0	0	0	25340000	17.0479	23777737	16.9843	1	0	2.49793e+06	14.731	0	1	1	1	0	18	0	0	0	0	0	0	0	0	0	1	0	0	0	0	0	0	0	0	0	0	0	0	0
2019-01-25	Thailand	21	130934	11.7825	100.335	4.60852	112.231	4.72056	20232627	16.8228	5764733	15.5673	25340000	17.0479	71307763	18.0825	0	1	2.38719e+06	14.6856	0	0	0	1	0	140	0	0	0	0	0	0	0	0	0	1	0	0	0	0	0	0	0	0	0	0	0	0	0
2019-01-26	Tonga	22	3344	8.11522	100.335	4.60852	128.295	4.85433	0	0	1024.49	6.93293	25340000	17.0479	104951	11.5612	1	0	3.29898e+06	15.0091	0	1	1	1	0	140	0	0	0	0	0	0	0	0	0	1	0	0	0	0	0	0	0	0	0	0	0	0	0
2019-01-27	UK	23	123072	11.7205	100.335	4.60852	118.069	4.77127	241760019	19.3035	251000000	19.341	25340000	17.0479	9211657	16.036	1	1	1.83975e+06	14.4251	0	0	1	1	0	154	0	0	0	0	0	0	0	0	0	1	0	0	0	0	0	0	0	0	0	0	0	0	0
2019-01-28	United Arab Emirates	24	536753	13.1933	100.335	4.60852	115.166	4.74638	0	0	1598369	14.2845	25340000	17.0479	66836327	18.0178	1	1	1.69913e+06	14.3456	0	1	0	1	0	140	0	0	0	0	0	0	0	0	0	1	0	0	0	0	0	0	0	0	0	0	0	0	0
2019-01-29	USA	25	380418	12.849	100.335	4.60852	115.435	4.74871	166866347	18.9327	116000000	18.5691	25340000	17.0479	328329953	19.6095	1	1	2.35545e+06	14.6722	0	0	0	1	0	156	0	0	0	0	0	0	0	0	0	1	0	0	0	0	0	0	0	0	0	0	0	0	0
2019-01-31	Vietnam	26	60777	11.015	100.335	4.60852	160.591	5.07886	367117	12.8134	395480	12.8879	25340000	17.0479	95776716	18.3775	1	1	2.43923e+06	14.7072	0	0	0	1	0	179	0	0	0	0	0	0	0	0	0	1	0	0	0	0	0	0	0	0	0	0	0	0	0
2019-02-01	Brunei	1	14224	9.56276	100.301	4.60818	99.1354	4.59649	1672621	14.3299	7844.14	8.96765	25340000	17.0479	438048	12.9901	1	1	2.6268e+06	14.7813	0	0	0	1	0	144	0	0	0	0	0	0	0	0	0	0	1	0	0	0	0	0	0	0	0	0	0	1	0
2019-02-02	Canada	2	58206	10.9718	100.301	4.60818	115.484	4.74913	44270737	17.6058	8969060	16.0093	25340000	17.0479	37601230	17.4425	1	1	2.24219e+06	14.623	0	0	0	1	0	176	0	0	0	0	0	0	0	0	0	0	1	0	0	0	0	0	0	0	0	0	0	0	1
2019-02-03	Chile	3	56497	10.942	100.301	4.60818	130.024	4.86772	2213447	14.6101	630322	13.354	25340000	17.0479	19039485	16.762	1	1	2.72558e+06	14.8182	0	0	0	1	0	163	0	0	0	0	0	0	0	0	0	0	1	0	0	0	0	0	0	0	0	0	0	0	0
2019-02-04	China	4	472920	13.0667	100.301	4.60818	124.231	4.82214	23792768	16.9849	11902820	16.2923	25340000	17.0479	1407745000	21.0653	1	1	2.36518e+06	14.6764	0	0	0	1	0	18	0	0	0	0	0	0	0	0	0	0	1	0	0	0	0	0	0	0	0	0	0	0	0
2019-02-06	Fiji	5	64004	11.0667	100.301	4.60818	134.047	4.89819	3839507	15.1609	22123.6	10.0044	25340000	17.0479	918465	13.7305	1	0	3.25977e+06	14.9972	0	1	1	1	0	140	0	0	0	0	0	0	0	0	0	0	1	0	0	0	0	0	0	0	0	0	0	0	0
2019-02-07	Hong Kong (SAR)	6	284177	12.5574	100.301	4.60818	133.408	4.89342	16534595	16.621	6259222	15.6496	25340000	17.0479	7507900	15.8315	1	1	2.4499e+06	14.7116	0	0	0	1	0	144	0	0	0	0	0	0	0	0	0	0	1	0	0	0	0	0	0	0	0	0	0	0	0
2019-02-08	India	7	16384	9.70412	100.301	4.60818	166.812	5.11687	1174775	13.9766	53045516	17.7867	25340000	17.0479	1383112050	21.0476	1	1	2.08445e+06	14.55	0	0	0	1	0	141	0	0	0	0	0	0	0	0	0	0	1	0	0	0	0	0	0	0	0	0	0	0	0
2019-02-09	Indonesia	8	276206	12.5289	100.301	4.60818	149.108	5.00467	19867301	16.8046	649393	13.3838	25340000	17.0479	269582878	19.4124	1	1	2.66431e+06	14.7955	0	0	0	1	0	142	0	0	0	0	0	0	0	0	0	0	1	0	0	0	0	0	0	0	0	0	0	0	0
2019-02-10	Japan	9	149649	11.9161	100.301	4.60818	105.15	4.65539	23934242	16.9908	3293723	15.0075	25340000	17.0479	126633000	18.6568	1	0	2.52658e+06	14.7424	0	1	1	1	0	3	0	0	0	0	0	0	0	0	0	0	1	0	0	0	0	0	0	0	0	0	0	0	0
2019-02-11	Korea	10	65576	11.091	100.301	4.60818	114.98	4.74476	9636375	16.0811	2724541	14.8178	25340000	17.0479	25755441	17.0642	0	1	2.44391e+06	14.7091	0	0	0	1	0	141	0	0	0	0	0	0	0	0	0	0	1	0	0	0	0	0	0	0	0	0	0	0	0
2019-02-12	Malaysia	11	267050	12.4952	100.301	4.60818	120.78	4.79397	9699054	16.0875	12510347	16.3421	25340000	17.0479	32804020	17.3061	1	1	2.52051e+06	14.74	0	0	0	1	0	144	0	0	0	0	0	0	0	0	0	0	1	0	0	0	0	0	0	0	0	0	0	0	0
2019-02-13	Mauritius	12	4914	8.50005	100.301	4.60818	130.854	4.87408	259668	12.4672	17470.7	9.76834	25340000	17.0479	1265711	14.0511	1	0	2.24274e+06	14.6232	0	1	1	1	0	176	0	0	0	0	0	0	0	0	0	0	1	0	0	0	0	0	0	0	0	0	0	0	0
2019-02-16	New Zealand	13	763778	13.546	100.301	4.60818	99.8237	4.60341	119798357	18.6013	14244646	16.4719	25340000	17.0479	4979200	15.4208	1	0	3.33103e+06	15.0188	0	1	1	1	0	179	0	0	0	0	0	0	0	0	0	0	1	0	0	0	0	0	0	0	0	0	0	0	0
2019-02-18	Philippines	14	75187	11.2277	100.301	4.60818	128.641	4.85702	7374576	15.8135	1182038	13.9828	25340000	17.0479	110380804	18.5194	1	0	2.62019e+06	14.7788	0	1	1	1	0	140	0	0	0	0	0	0	0	0	0	0	1	0	0	0	0	0	0	0	0	0	0	0	0
2019-02-19	Qatar	15	142800	11.8692	100.301	4.60818	115.093	4.74574	0	0	55792.5	10.9294	25340000	17.0479	2807235	14.8477	1	1	1.80914e+06	14.4084	0	0	0	1	0	154	0	0	0	0	0	0	0	0	0	0	1	0	0	0	0	0	0	0	0	0	0	0	0
2019-02-20	Singapore	16	532610	13.1855	100.301	4.60818	114.352	4.73928	18706853	16.7444	3447425	15.0531	25340000	17.0479	5703569	15.5566	1	1	2.54598e+06	14.75	0	0	0	1	0	144	0	0	0	0	0	0	0	0	0	0	1	0	0	0	0	0	0	0	0	0	0	0	0
2019-02-21	Solomon Islands	17	8392	9.03515	100.301	4.60818	131.445	4.87859	768260	13.5519	135.051	4.91303	25340000	17.0479	674993	13.4225	1	0	3.10584e+06	14.9488	0	1	1	1	0	140	0	0	0	0	0	0	0	0	0	0	1	0	0	0	0	0	0	0	0	0	0	0	0
2019-02-22	South Africa	18	29476	10.2914	100.301	4.60818	156.048	5.05016	21307116	16.8746	16824183	16.6383	25340000	17.0479	58087055	17.8775	1	1	2.18742e+06	14.5982	0	0	0	1	0	140	0	0	0	0	0	0	0	0	0	0	1	0	0	0	0	0	0	0	0	0	0	0	0
2019-02-23	Sri Lanka	19	16408	9.70559	100.301	4.60818	152.058	5.02427	850637	13.6537	103412	11.5465	25340000	17.0479	21803000	16.8976	1	0	2.21538e+06	14.6109	0	1	1	1	0	141	0	0	0	0	0	0	0	0	0	0	1	0	0	0	0	0	0	0	0	0	0	0	0
2019-02-24	Taiwan	20	54636	10.9085	100.301	4.60818	148.523	5.00074	0	0	0	0	25340000	17.0479	23777737	16.9843	1	0	2.49793e+06	14.731	0	1	1	1	0	18	0	0	0	0	0	0	0	0	0	0	1	0	0	0	0	0	0	0	0	0	0	0	0
2019-02-25	Thailand	21	116528	11.6659	100.301	4.60818	112.496	4.72292	20232627	16.8228	5764733	15.5673	25340000	17.0479	71307763	18.0825	0	1	2.38719e+06	14.6856	0	0	0	1	0	140	0	0	0	0	0	0	0	0	0	0	1	0	0	0	0	0	0	0	0	0	0	0	0
2019-02-26	Tonga	22	2816	7.94343	100.301	4.60818	128.552	4.85634	0	0	1024.49	6.93293	25340000	17.0479	104951	11.5612	1	0	3.29898e+06	15.0091	0	1	1	1	0	140	0	0	0	0	0	0	0	0	0	0	1	0	0	0	0	0	0	0	0	0	0	0	0
2019-02-27	UK	23	112615	11.6317	100.301	4.60818	118.513	4.77502	241760019	19.3035	251000000	19.341	25340000	17.0479	9211657	16.036	1	1	1.83975e+06	14.4251	0	0	1	1	0	154	0	0	0	0	0	0	0	0	0	0	1	0	0	0	0	0	0	0	0	0	0	0	0
2019-02-28	United Arab Emirates	24	452154	13.0218	100.301	4.60818	114.822	4.74338	0	0	1598369	14.2845	25340000	17.0479	66836327	18.0178	1	1	1.69913e+06	14.3456	0	1	0	1	0	140	0	0	0	0	0	0	0	0	0	0	1	0	0	0	0	0	0	0	0	0	0	0	0
2019-02-25	USA	25	311280	12.6485	100.301	4.60818	115.923	4.75292	166866347	18.9327	116000000	18.5691	25340000	17.0479	328329953	19.6095	1	1	2.35545e+06	14.6722	0	0	0	1	0	156	0	0	0	0	0	0	0	0	0	0	1	0	0	0	0	0	0	0	0	0	0	0	0
2019-02-27	Vietnam	26	56798	10.9473	100.301	4.60818	161.879	5.08685	367117	12.8134	395480	12.8879	25340000	17.0479	95776716	18.3775	1	1	2.43923e+06	14.7072	0	0	0	1	0	179	0	0	0	0	0	0	0	0	0	0	1	0	0	0	0	0	0	0	0	0	0	0	0
2019-03-01	Brunei	1	15748	9.66453	100.281	4.60798	99.2606	4.59775	1672621	14.3299	7844.14	8.96765	25340000	17.0479	438048	12.9901	1	1	2.6268e+06	14.7813	0	0	0	1	0	144	0	0	0	0	0	0	0	0	0	0	0	1	0	0	0	0	0	0	0	0	0	1	0
2019-03-02	Canada	2	63144	11.0532	100.281	4.60798	116.256	4.7558	44270737	17.6058	8969060	16.0093	25340000	17.0479	37601230	17.4425	1	1	2.24219e+06	14.623	0	0	0	1	0	176	0	0	0	0	0	0	0	0	0	0	0	1	0	0	0	0	0	0	0	0	0	0	1
2019-03-03	Chile	3	63035	11.0515	100.281	4.60798	130.643	4.87247	2213447	14.6101	630322	13.354	25340000	17.0479	19039485	16.762	1	1	2.72558e+06	14.8182	0	0	0	1	0	163	0	0	0	0	0	0	0	0	0	0	0	1	0	0	0	0	0	0	0	0	0	0	0
2019-03-04	China	4	406760	12.916	100.281	4.60798	123.771	4.81843	23792768	16.9849	11902820	16.2923	25340000	17.0479	1407745000	21.0653	1	1	2.36518e+06	14.6764	0	0	0	1	0	18	0	0	0	0	0	0	0	0	0	0	0	1	0	0	0	0	0	0	0	0	0	0	0
2019-03-06	Fiji	5	76238	11.2416	100.281	4.60798	133.244	4.89218	3839507	15.1609	22123.6	10.0044	25340000	17.0479	918465	13.7305	1	0	3.25977e+06	14.9972	0	1	1	1	0	140	0	0	0	0	0	0	0	0	0	0	0	1	0	0	0	0	0	0	0	0	0	0	0
2019-03-07	Hong Kong (SAR)	6	297088	12.6018	100.281	4.60798	133.003	4.89037	16534595	16.621	6259222	15.6496	25340000	17.0479	7507900	15.8315	1	1	2.4499e+06	14.7116	0	0	0	1	0	144	0	0	0	0	0	0	0	0	0	0	0	1	0	0	0	0	0	0	0	0	0	0	0
2019-03-08	India	7	18432	9.8219	100.281	4.60798	167.409	5.12044	1174775	13.9766	53045516	17.7867	25340000	17.0479	1383112050	21.0476	1	1	2.08445e+06	14.55	0	0	0	1	0	141	0	0	0	0	0	0	0	0	0	0	0	1	0	0	0	0	0	0	0	0	0	0	0
2019-03-09	Indonesia	8	293776	12.5906	100.281	4.60798	149.273	5.00578	19867301	16.8046	649393	13.3838	25340000	17.0479	269582878	19.4124	1	1	2.66431e+06	14.7955	0	0	0	1	0	142	0	0	0	0	0	0	0	0	0	0	0	1	0	0	0	0	0	0	0	0	0	0	0
2019-03-10	Japan	9	165948	12.0194	100.281	4.60798	105.15	4.65539	23934242	16.9908	3293723	15.0075	25340000	17.0479	126633000	18.6568	1	0	2.52658e+06	14.7424	0	1	1	1	0	3	0	0	0	0	0	0	0	0	0	0	0	1	0	0	0	0	0	0	0	0	0	0	0
2019-03-11	Korea	10	68298	11.1317	100.281	4.60798	114.76	4.74284	9636375	16.0811	2724541	14.8178	25340000	17.0479	25755441	17.0642	0	1	2.44391e+06	14.7091	0	0	0	1	0	141	0	0	0	0	0	0	0	0	0	0	0	1	0	0	0	0	0	0	0	0	0	0	0
2019-03-12	Malaysia	11	276440	12.5298	100.281	4.60798	121.08	4.79645	9699054	16.0875	12510347	16.3421	25340000	17.0479	32804020	17.3061	1	1	2.52051e+06	14.74	0	0	0	1	0	144	0	0	0	0	0	0	0	0	0	0	0	1	0	0	0	0	0	0	0	0	0	0	0
2019-03-13	Mauritius	12	4914	8.50005	100.281	4.60798	130.854	4.87408	259668	12.4672	17470.7	9.76834	25340000	17.0479	1265711	14.0511	1	0	2.24274e+06	14.6232	0	1	1	1	0	176	0	0	0	0	0	0	0	0	0	0	0	1	0	0	0	0	0	0	0	0	0	0	0
2019-03-16	New Zealand	13	832979	13.6328	100.281	4.60798	99.7395	4.60256	119798357	18.6013	14244646	16.4719	25340000	17.0479	4979200	15.4208	1	0	3.33103e+06	15.0188	0	1	1	1	0	179	0	0	0	0	0	0	0	0	0	0	0	1	0	0	0	0	0	0	0	0	0	0	0
2019-03-18	Philippines	14	80358	11.2943	100.281	4.60798	128.767	4.85801	7374576	15.8135	1182038	13.9828	25340000	17.0479	110380804	18.5194	1	0	2.62019e+06	14.7788	0	1	1	1	0	140	0	0	0	0	0	0	0	0	0	0	0	1	0	0	0	0	0	0	0	0	0	0	0
2019-03-19	Qatar	15	158100	11.971	100.281	4.60798	115.061	4.74547	0	0	55792.5	10.9294	25340000	17.0479	2807235	14.8477	1	1	1.80914e+06	14.4084	0	0	0	1	0	154	0	0	0	0	0	0	0	0	0	0	0	1	0	0	0	0	0	0	0	0	0	0	0
2019-03-20	Singapore	16	569340	13.2522	100.281	4.60798	114.374	4.73947	18706853	16.7444	3447425	15.0531	25340000	17.0479	5703569	15.5566	1	1	2.54598e+06	14.75	0	0	0	1	0	144	0	0	0	0	0	0	0	0	0	0	0	1	0	0	0	0	0	0	0	0	0	0	0
2019-03-21	Solomon Islands	17	9072	9.11306	100.281	4.60798	133.092	4.89104	768260	13.5519	135.051	4.91303	25340000	17.0479	674993	13.4225	1	0	3.10584e+06	14.9488	0	1	1	1	0	140	0	0	0	0	0	0	0	0	0	0	0	1	0	0	0	0	0	0	0	0	0	0	0
2019-03-22	South Africa	18	34521	10.4494	100.281	4.60798	157.279	5.05802	21307116	16.8746	16824183	16.6383	25340000	17.0479	58087055	17.8775	1	1	2.18742e+06	14.5982	0	0	0	1	0	140	0	0	0	0	0	0	0	0	0	0	0	1	0	0	0	0	0	0	0	0	0	0	0
2019-03-23	Sri Lanka	19	18166	9.80736	100.281	4.60798	151.698	5.02189	850637	13.6537	103412	11.5465	25340000	17.0479	21803000	16.8976	1	0	2.21538e+06	14.6109	0	1	1	1	0	141	0	0	0	0	0	0	0	0	0	0	0	1	0	0	0	0	0	0	0	0	0	0	0
2019-03-24	Taiwan	20	58682	10.9799	100.281	4.60798	148.523	5.00074	0	0	0	0	25340000	17.0479	23777737	16.9843	1	0	2.49793e+06	14.731	0	1	1	1	0	18	0	0	0	0	0	0	0	0	0	0	0	1	0	0	0	0	0	0	0	0	0	0	0
2019-03-25	Thailand	21	122207	11.7135	100.281	4.60798	112.959	4.72703	20232627	16.8228	5764733	15.5673	25340000	17.0479	71307763	18.0825	0	1	2.38719e+06	14.6856	0	0	0	1	0	140	0	0	0	0	0	0	0	0	0	0	0	1	0	0	0	0	0	0	0	0	0	0	0
2019-03-26	Tonga	22	2816	7.94343	100.281	4.60798	129.196	4.86133	0	0	1024.49	6.93293	25340000	17.0479	104951	11.5612	1	0	3.29898e+06	15.0091	0	1	1	1	0	140	0	0	0	0	0	0	0	0	0	0	0	1	0	0	0	0	0	0	0	0	0	0	0
2019-03-27	UK	23	125209	11.7377	100.281	4.60798	118.735	4.77689	241760019	19.3035	251000000	19.341	25340000	17.0479	9211657	16.036	1	1	1.83975e+06	14.4251	0	0	1	1	0	154	0	0	0	0	0	0	0	0	0	0	0	1	0	0	0	0	0	0	0	0	0	0	0
2019-03-28	United Arab Emirates	24	498945	13.1203	100.281	4.60798	114.147	4.73749	0	0	1598369	14.2845	25340000	17.0479	66836327	18.0178	1	1	1.69913e+06	14.3456	0	1	0	1	0	140	0	0	0	0	0	0	0	0	0	0	0	1	0	0	0	0	0	0	0	0	0	0	0
2019-03-29	USA	25	347919	12.7597	100.281	4.60798	116.577	4.75855	166866347	18.9327	116000000	18.5691	25340000	17.0479	328329953	19.6095	1	1	2.35545e+06	14.6722	0	0	0	1	0	156	0	0	0	0	0	0	0	0	0	0	0	1	0	0	0	0	0	0	0	0	0	0	0
2019-03-31	Vietnam	26	62148	11.0373	100.281	4.60798	161.539	5.08475	367117	12.8134	395480	12.8879	25340000	17.0479	95776716	18.3775	1	1	2.43923e+06	14.7072	0	0	0	1	0	179	0	0	0	0	0	0	0	0	0	0	0	1	0	0	0	0	0	0	0	0	0	0	0
2019-04-01	Brunei	1	15240	9.63174	100.276	4.60793	99.1925	4.59706	1672621	14.3299	7844.14	8.96765	25340000	17.0479	438048	12.9901	1	1	2.6268e+06	14.7813	0	0	0	1	0	144	0	0	0	0	0	0	0	0	0	0	0	0	1	0	0	0	0	0	0	0	0	1	0
2019-04-02	Canada	2	58347	10.9742	100.276	4.60793	116.772	4.76022	44270737	17.6058	8969060	16.0093	25340000	17.0479	37601230	17.4425	1	1	2.24219e+06	14.623	0	0	0	1	0	176	0	0	0	0	0	0	0	0	0	0	0	0	1	0	0	0	0	0	0	0	0	0	1
2019-04-03	Chile	3	54734	10.9103	100.276	4.60793	130.991	4.87513	2213447	14.6101	630322	13.354	25340000	17.0479	19039485	16.762	1	1	2.72558e+06	14.8182	0	0	0	1	0	163	0	0	0	0	0	0	0	0	0	0	0	0	1	0	0	0	0	0	0	0	0	0	0
2019-04-04	China	4	362414	12.8005	100.276	4.60793	123.886	4.81936	23792768	16.9849	11902820	16.2923	25340000	17.0479	1407745000	21.0653	1	1	2.36518e+06	14.6764	0	0	0	1	0	18	0	0	0	0	0	0	0	0	0	0	0	0	1	0	0	0	0	0	0	0	0	0	0
2019-04-06	Fiji	5	108227	11.592	100.276	4.60793	133.015	4.89046	3839507	15.1609	22123.6	10.0044	25340000	17.0479	918465	13.7305	1	0	3.25977e+06	14.9972	0	1	1	1	0	140	0	0	0	0	0	0	0	0	0	0	0	0	1	0	0	0	0	0	0	0	0	0	0
2019-04-07	Hong Kong (SAR)	6	294279	12.5923	100.276	4.60793	133.949	4.89746	16534595	16.621	6259222	15.6496	25340000	17.0479	7507900	15.8315	1	1	2.4499e+06	14.7116	0	0	0	1	0	144	0	0	0	0	0	0	0	0	0	0	0	0	1	0	0	0	0	0	0	0	0	0	0
2019-04-08	India	7	17408	9.76474	100.276	4.60793	168.362	5.12612	1174775	13.9766	53045516	17.7867	25340000	17.0479	1383112050	21.0476	1	1	2.08445e+06	14.55	0	0	0	1	0	141	0	0	0	0	0	0	0	0	0	0	0	0	1	0	0	0	0	0	0	0	0	0	0
2019-04-09	Indonesia	8	308715	12.6402	100.276	4.60793	149.932	5.01018	19867301	16.8046	649393	13.3838	25340000	17.0479	269582878	19.4124	1	1	2.66431e+06	14.7955	0	0	0	1	0	142	0	0	0	0	0	0	0	0	0	0	0	0	1	0	0	0	0	0	0	0	0	0	0
2019-04-10	Japan	9	156108	11.9583	100.276	4.60793	105.467	4.6584	23934242	16.9908	3293723	15.0075	25340000	17.0479	126633000	18.6568	1	0	2.52658e+06	14.7424	0	1	1	1	0	3	0	0	0	0	0	0	0	0	0	0	0	0	1	0	0	0	0	0	0	0	0	0	0
2019-04-11	Korea	10	43062	10.6704	100.276	4.60793	115.176	4.74647	9636375	16.0811	2724541	14.8178	25340000	17.0479	25755441	17.0642	0	1	2.44391e+06	14.7091	0	0	0	1	0	141	0	0	0	0	0	0	0	0	0	0	0	0	1	0	0	0	0	0	0	0	0	0	0
2019-04-12	Malaysia	11	279038	12.5391	100.276	4.60793	121.08	4.79645	9699054	16.0875	12510347	16.3421	25340000	17.0479	32804020	17.3061	1	1	2.52051e+06	14.74	0	0	0	1	0	144	0	0	0	0	0	0	0	0	0	0	0	0	1	0	0	0	0	0	0	0	0	0	0
2019-04-13	Mauritius	12	4368	8.38229	100.276	4.60793	130.854	4.87408	259668	12.4672	17470.7	9.76834	25340000	17.0479	1265711	14.0511	1	0	2.24274e+06	14.6232	0	1	1	1	0	176	0	0	0	0	0	0	0	0	0	0	0	0	1	0	0	0	0	0	0	0	0	0	0
2019-04-16	New Zealand	13	804932	13.5985	100.276	4.60793	99.5751	4.60091	119798357	18.6013	14244646	16.4719	25340000	17.0479	4979200	15.4208	1	0	3.33103e+06	15.0188	0	1	1	1	0	179	0	0	0	0	0	0	0	0	0	0	0	0	1	0	0	0	0	0	0	0	0	0	0
2019-04-18	Philippines	14	85851	11.3604	100.276	4.60793	129.147	4.86095	7374576	15.8135	1182038	13.9828	25340000	17.0479	110380804	18.5194	1	0	2.62019e+06	14.7788	0	1	1	1	0	140	0	0	0	0	0	0	0	0	0	0	0	0	1	0	0	0	0	0	0	0	0	0	0
2019-04-19	Qatar	15	153000	11.9382	100.276	4.60793	115.649	4.75056	0	0	55792.5	10.9294	25340000	17.0479	2807235	14.8477	1	1	1.80914e+06	14.4084	0	0	0	1	0	154	0	0	0	0	0	0	0	0	0	0	0	0	1	0	0	0	0	0	0	0	0	0	0
2019-04-20	Singapore	16	560141	13.2359	100.276	4.60793	114.123	4.73728	18706853	16.7444	3447425	15.0531	25340000	17.0479	5703569	15.5566	1	1	2.54598e+06	14.75	0	0	0	1	0	144	0	0	0	0	0	0	0	0	0	0	0	0	1	0	0	0	0	0	0	0	0	0	0
2019-04-21	Solomon Islands	17	8608	9.06056	100.276	4.60793	131.952	4.88244	768260	13.5519	135.051	4.91303	25340000	17.0479	674993	13.4225	1	0	3.10584e+06	14.9488	0	1	1	1	0	140	0	0	0	0	0	0	0	0	0	0	0	0	1	0	0	0	0	0	0	0	0	0	0
2019-04-22	South Africa	18	34084	10.4366	100.276	4.60793	158.159	5.0636	21307116	16.8746	16824183	16.6383	25340000	17.0479	58087055	17.8775	1	1	2.18742e+06	14.5982	0	0	0	1	0	140	0	0	0	0	0	0	0	0	0	0	0	0	1	0	0	0	0	0	0	0	0	0	0
2019-04-23	Sri Lanka	19	17580	9.77457	100.276	4.60793	152.779	5.02899	850637	13.6537	103412	11.5465	25340000	17.0479	21803000	16.8976	1	0	2.21538e+06	14.6109	0	1	1	1	0	141	0	0	0	0	0	0	0	0	0	0	0	0	1	0	0	0	0	0	0	0	0	0	0
2019-04-24	Taiwan	20	61296	11.0235	100.276	4.60793	148.093	4.99784	0	0	0	0	25340000	17.0479	23777737	16.9843	1	0	2.49793e+06	14.731	0	1	1	1	0	18	0	0	0	0	0	0	0	0	0	0	0	0	1	0	0	0	0	0	0	0	0	0	0
2019-04-25	Thailand	21	123387	11.7231	100.276	4.60793	113.456	4.73142	20232627	16.8228	5764733	15.5673	25340000	17.0479	71307763	18.0825	0	1	2.38719e+06	14.6856	0	0	0	1	0	140	0	0	0	0	0	0	0	0	0	0	0	0	1	0	0	0	0	0	0	0	0	0	0
2019-04-26	Tonga	22	3168	8.06117	100.276	4.60793	127.008	4.84425	0	0	1024.49	6.93293	25340000	17.0479	104951	11.5612	1	0	3.29898e+06	15.0091	0	1	1	1	0	140	0	0	0	0	0	0	0	0	0	0	0	0	1	0	0	0	0	0	0	0	0	0	0
2019-04-27	UK	23	121777	11.71	100.276	4.60793	119.401	4.78249	241760019	19.3035	251000000	19.341	25340000	17.0479	9211657	16.036	1	1	1.83975e+06	14.4251	0	0	1	1	0	154	0	0	0	0	0	0	0	0	0	0	0	0	1	0	0	0	0	0	0	0	0	0	0
2019-04-28	United Arab Emirates	24	444296	13.0042	100.276	4.60793	114.342	4.73919	0	0	1598369	14.2845	25340000	17.0479	66836327	18.0178	1	1	1.69913e+06	14.3456	0	1	0	1	0	140	0	0	0	0	0	0	0	0	0	0	0	0	1	0	0	0	0	0	0	0	0	0	0
2019-04-29	USA	25	337915	12.7306	100.276	4.60793	117.194	4.76383	166866347	18.9327	116000000	18.5691	25340000	17.0479	328329953	19.6095	1	1	2.35545e+06	14.6722	0	0	0	1	0	156	0	0	0	0	0	0	0	0	0	0	0	0	1	0	0	0	0	0	0	0	0	0	0
2019-04-29	Vietnam	26	58140	10.9706	100.276	4.60793	162.04	5.08784	367117	12.8134	395480	12.8879	25340000	17.0479	95776716	18.3775	1	1	2.43923e+06	14.7072	0	0	0	1	0	179	0	0	0	0	0	0	0	0	0	0	0	0	1	0	0	0	0	0	0	0	0	0	0
2019-05-01	Brunei	1	15748	9.66453	100.288	4.60805	98.4768	4.58982	1672621	14.3299	7844.14	8.96765	25340000	17.0479	438048	12.9901	1	1	2.6268e+06	14.7813	0	0	0	1	0	144	0	0	0	0	0	0	0	0	0	0	0	0	0	1	0	0	0	0	0	0	0	1	0
2019-05-02	Canada	2	61277	11.0232	100.288	4.60805	117.287	4.76462	44270737	17.6058	8969060	16.0093	25340000	17.0479	37601230	17.4425	1	1	2.24219e+06	14.623	0	0	0	1	0	176	0	0	0	0	0	0	0	0	0	0	0	0	0	1	0	0	0	0	0	0	0	0	1
2019-05-03	Chile	3	48480	10.7889	100.288	4.60805	131.778	4.88112	2213447	14.6101	630322	13.354	25340000	17.0479	19039485	16.762	1	1	2.72558e+06	14.8182	0	0	0	1	0	163	0	0	0	0	0	0	0	0	0	0	0	0	0	1	0	0	0	0	0	0	0	0	0
2019-05-04	China	4	345633	12.7531	100.288	4.60805	123.886	4.81936	23792768	16.9849	11902820	16.2923	25340000	17.0479	1407745000	21.0653	1	1	2.36518e+06	14.6764	0	0	0	1	0	18	0	0	0	0	0	0	0	0	0	0	0	0	0	1	0	0	0	0	0	0	0	0	0
2019-05-06	Fiji	5	94346	11.4547	100.288	4.60805	133.588	4.89476	3839507	15.1609	22123.6	10.0044	25340000	17.0479	918465	13.7305	1	0	3.25977e+06	14.9972	0	1	1	1	0	140	0	0	0	0	0	0	0	0	0	0	0	0	0	1	0	0	0	0	0	0	0	0	0
2019-05-07	Hong Kong (SAR)	6	283385	12.5546	100.288	4.60805	133.814	4.89645	16534595	16.621	6259222	15.6496	25340000	17.0479	7507900	15.8315	1	1	2.4499e+06	14.7116	0	0	0	1	0	144	0	0	0	0	0	0	0	0	0	0	0	0	0	1	0	0	0	0	0	0	0	0	0
2019-05-08	India	7	17664	9.77934	100.288	4.60805	169.316	5.13177	1174775	13.9766	53045516	17.7867	25340000	17.0479	1383112050	21.0476	1	1	2.08445e+06	14.55	0	0	0	1	0	141	0	0	0	0	0	0	0	0	0	0	0	0	0	1	0	0	0	0	0	0	0	0	0
2019-05-09	Indonesia	8	319135	12.6734	100.288	4.60805	150.954	5.01698	19867301	16.8046	649393	13.3838	25340000	17.0479	269582878	19.4124	1	1	2.66431e+06	14.7955	0	0	0	1	0	142	0	0	0	0	0	0	0	0	0	0	0	0	0	1	0	0	0	0	0	0	0	0	0
2019-05-10	Japan	9	144399	11.8803	100.288	4.60805	105.467	4.6584	23934242	16.9908	3293723	15.0075	25340000	17.0479	126633000	18.6568	1	0	2.52658e+06	14.7424	0	1	1	1	0	3	0	0	0	0	0	0	0	0	0	0	0	0	0	1	0	0	0	0	0	0	0	0	0
2019-05-11	Korea	10	44186	10.6962	100.288	4.60805	115.374	4.74818	9636375	16.0811	2724541	14.8178	25340000	17.0479	25755441	17.0642	0	1	2.44391e+06	14.7091	0	0	0	1	0	141	0	0	0	0	0	0	0	0	0	0	0	0	0	1	0	0	0	0	0	0	0	0	0
2019-05-12	Malaysia	11	290999	12.5811	100.288	4.60805	121.38	4.79892	9699054	16.0875	12510347	16.3421	25340000	17.0479	32804020	17.3061	1	1	2.52051e+06	14.74	0	0	0	1	0	144	0	0	0	0	0	0	0	0	0	0	0	0	0	1	0	0	0	0	0	0	0	0	0
2019-05-13	Mauritius	12	4914	8.50005	100.288	4.60805	130.854	4.87408	259668	12.4672	17470.7	9.76834	25340000	17.0479	1265711	14.0511	1	0	2.24274e+06	14.6232	0	1	1	1	0	176	0	0	0	0	0	0	0	0	0	0	0	0	0	1	0	0	0	0	0	0	0	0	0
2019-05-16	New Zealand	13	715576	13.4808	100.288	4.60805	99.4985	4.60014	119798357	18.6013	14244646	16.4719	25340000	17.0479	4979200	15.4208	1	0	3.33103e+06	15.0188	0	1	1	1	0	179	0	0	0	0	0	0	0	0	0	0	0	0	0	1	0	0	0	0	0	0	0	0	0
2019-05-18	Philippines	14	84091	11.3397	100.288	4.60805	129.4	4.86291	7374576	15.8135	1182038	13.9828	25340000	17.0479	110380804	18.5194	1	0	2.62019e+06	14.7788	0	1	1	1	0	140	0	0	0	0	0	0	0	0	0	0	0	0	0	1	0	0	0	0	0	0	0	0	0
2019-05-19	Qatar	15	158100	11.971	100.288	4.60805	114.997	4.74491	0	0	55792.5	10.9294	25340000	17.0479	2807235	14.8477	1	1	1.80914e+06	14.4084	0	0	0	1	0	154	0	0	0	0	0	0	0	0	0	0	0	0	0	1	0	0	0	0	0	0	0	0	0
2019-05-20	Singapore	16	553995	13.2249	100.288	4.60805	114.778	4.743	18706853	16.7444	3447425	15.0531	25340000	17.0479	5703569	15.5566	1	1	2.54598e+06	14.75	0	0	0	1	0	144	0	0	0	0	0	0	0	0	0	0	0	0	0	1	0	0	0	0	0	0	0	0	0
2019-05-21	Solomon Islands	17	8880	9.09167	100.288	4.60805	131.952	4.88244	768260	13.5519	135.051	4.91303	25340000	17.0479	674993	13.4225	1	0	3.10584e+06	14.9488	0	1	1	1	0	140	0	0	0	0	0	0	0	0	0	0	0	0	0	1	0	0	0	0	0	0	0	0	0
2019-05-22	South Africa	18	32606	10.3923	100.288	4.60805	158.686	5.06693	21307116	16.8746	16824183	16.6383	25340000	17.0479	58087055	17.8775	1	1	2.18742e+06	14.5982	0	0	0	1	0	140	0	0	0	0	0	0	0	0	0	0	0	0	0	1	0	0	0	0	0	0	0	0	0
2019-05-23	Sri Lanka	19	18166	9.80736	100.288	4.60805	154.459	5.03993	850637	13.6537	103412	11.5465	25340000	17.0479	21803000	16.8976	1	0	2.21538e+06	14.6109	0	1	1	1	0	141	0	0	0	0	0	0	0	0	0	0	0	0	0	1	0	0	0	0	0	0	0	0	0
2019-05-24	Taiwan	20	49068	10.801	100.288	4.60805	148.093	4.99784	0	0	0	0	25340000	17.0479	23777737	16.9843	1	0	2.49793e+06	14.731	0	1	1	1	0	18	0	0	0	0	0	0	0	0	0	0	0	0	0	1	0	0	0	0	0	0	0	0	0
2019-05-25	Thailand	21	124142	11.7292	100.288	4.60805	113.997	4.73617	20232627	16.8228	5764733	15.5673	25340000	17.0479	71307763	18.0825	0	1	2.38719e+06	14.6856	0	0	0	1	0	140	0	0	0	0	0	0	0	0	0	0	0	0	0	1	0	0	0	0	0	0	0	0	0
2019-05-26	Tonga	22	3168	8.06117	100.288	4.60805	128.166	4.85333	0	0	1024.49	6.93293	25340000	17.0479	104951	11.5612	1	0	3.29898e+06	15.0091	0	1	1	1	0	140	0	0	0	0	0	0	0	0	0	0	0	0	0	1	0	0	0	0	0	0	0	0	0
2019-05-27	UK	23	125910	11.7433	100.288	4.60805	119.734	4.78527	241760019	19.3035	251000000	19.341	25340000	17.0479	9211657	16.036	1	1	1.83975e+06	14.4251	0	0	1	1	0	154	0	0	0	0	0	0	0	0	0	0	0	0	0	1	0	0	0	0	0	0	0	0	0
2019-05-28	United Arab Emirates	24	436983	12.9877	100.288	4.60805	115.445	4.7488	0	0	1598369	14.2845	25340000	17.0479	66836327	18.0178	1	1	1.69913e+06	14.3456	0	1	0	1	0	140	0	0	0	0	0	0	0	0	0	0	0	0	0	1	0	0	0	0	0	0	0	0	0
2019-05-29	USA	25	343309	12.7464	100.288	4.60805	117.443	4.76596	166866347	18.9327	116000000	18.5691	25340000	17.0479	328329953	19.6095	1	1	2.35545e+06	14.6722	0	0	0	1	0	156	0	0	0	0	0	0	0	0	0	0	0	0	0	1	0	0	0	0	0	0	0	0	0
2019-05-31	Vietnam	26	55302	10.9206	100.288	4.60805	162.838	5.09276	367117	12.8134	395480	12.8879	25340000	17.0479	95776716	18.3775	1	1	2.43923e+06	14.7072	0	0	0	1	0	179	0	0	0	0	0	0	0	0	0	0	0	0	0	1	0	0	0	0	0	0	0	0	0
2019-06-01	Brunei	1	15240	9.63174	100.317	4.60833	98.4861	4.58992	1672621	14.3299	7844.14	8.96765	25340000	17.0479	438048	12.9901	1	1	2.6268e+06	14.7813	0	0	0	1	0	144	0	0	0	0	0	0	0	0	0	0	0	0	0	0	1	0	0	0	0	0	0	1	0
2019-06-02	Canada	2	60863	11.0164	100.317	4.60833	117.029	4.76242	44270737	17.6058	8969060	16.0093	25340000	17.0479	37601230	17.4425	1	1	2.24219e+06	14.623	0	0	0	1	0	176	0	0	0	0	0	0	0	0	0	0	0	0	0	0	1	0	0	0	0	0	0	0	1
2019-06-03	Chile	3	49706	10.8139	100.317	4.60833	131.843	4.88161	2213447	14.6101	630322	13.354	25340000	17.0479	19039485	16.762	1	1	2.72558e+06	14.8182	0	0	0	1	0	163	0	0	0	0	0	0	0	0	0	0	0	0	0	0	1	0	0	0	0	0	0	0	0
2019-06-04	China	4	341502	12.7411	100.317	4.60833	123.771	4.81843	23792768	16.9849	11902820	16.2923	25340000	17.0479	1407745000	21.0653	1	1	2.36518e+06	14.6764	0	0	0	1	0	18	0	0	0	0	0	0	0	0	0	0	0	0	0	0	1	0	0	0	0	0	0	0	0
2019-06-06	Fiji	5	96946	11.4819	100.317	4.60833	133.474	4.8939	3839507	15.1609	22123.6	10.0044	25340000	17.0479	918465	13.7305	1	0	3.25977e+06	14.9972	0	1	1	1	0	140	0	0	0	0	0	0	0	0	0	0	0	0	0	0	1	0	0	0	0	0	0	0	0
2019-06-07	Hong Kong (SAR)	6	286026	12.5638	100.317	4.60833	134.76	4.9035	16534595	16.621	6259222	15.6496	25340000	17.0479	7507900	15.8315	1	1	2.4499e+06	14.7116	0	0	0	1	0	144	0	0	0	0	0	0	0	0	0	0	0	0	0	0	1	0	0	0	0	0	0	0	0
2019-06-08	India	7	18176	9.80791	100.317	4.60833	170.389	5.13809	1174775	13.9766	53045516	17.7867	25340000	17.0479	1383112050	21.0476	1	1	2.08445e+06	14.55	0	0	0	1	0	141	0	0	0	0	0	0	0	0	0	0	0	0	0	0	1	0	0	0	0	0	0	0	0
2019-06-09	Indonesia	8	324209	12.6891	100.317	4.60833	151.789	5.02249	19867301	16.8046	649393	13.3838	25340000	17.0479	269582878	19.4124	1	1	2.66431e+06	14.7955	0	0	0	1	0	142	0	0	0	0	0	0	0	0	0	0	0	0	0	0	1	0	0	0	0	0	0	0	0
2019-06-10	Japan	9	138672	11.8399	100.317	4.60833	105.256	4.65639	23934242	16.9908	3293723	15.0075	25340000	17.0479	126633000	18.6568	1	0	2.52658e+06	14.7424	0	1	1	1	0	3	0	0	0	0	0	0	0	0	0	0	0	0	0	0	1	0	0	0	0	0	0	0	0
2019-06-11	Korea	10	43856	10.6887	100.317	4.60833	115.188	4.74657	9636375	16.0811	2724541	14.8178	25340000	17.0479	25755441	17.0642	0	1	2.44391e+06	14.7091	0	0	0	1	0	141	0	0	0	0	0	0	0	0	0	0	0	0	0	0	1	0	0	0	0	0	0	0	0
2019-06-12	Malaysia	11	285434	12.5618	100.317	4.60833	121.38	4.79892	9699054	16.0875	12510347	16.3421	25340000	17.0479	32804020	17.3061	1	1	2.52051e+06	14.74	0	0	0	1	0	144	0	0	0	0	0	0	0	0	0	0	0	0	0	0	1	0	0	0	0	0	0	0	0
2019-06-13	Mauritius	12	4964	8.51017	100.317	4.60833	129.601	4.86446	259668	12.4672	17470.7	9.76834	25340000	17.0479	1265711	14.0511	1	0	2.24274e+06	14.6232	0	1	1	1	0	176	0	0	0	0	0	0	0	0	0	0	0	0	0	0	1	0	0	0	0	0	0	0	0
2019-06-16	New Zealand	13	718387	13.4848	100.317	4.60833	99.4236	4.59939	119798357	18.6013	14244646	16.4719	25340000	17.0479	4979200	15.4208	1	0	3.33103e+06	15.0188	0	1	1	1	0	179	0	0	0	0	0	0	0	0	0	0	0	0	0	0	1	0	0	0	0	0	0	0	0
2019-06-18	Philippines	14	80841	11.3003	100.317	4.60833	129.274	4.86193	7374576	15.8135	1182038	13.9828	25340000	17.0479	110380804	18.5194	1	0	2.62019e+06	14.7788	0	1	1	1	0	140	0	0	0	0	0	0	0	0	0	0	0	0	0	0	1	0	0	0	0	0	0	0	0
2019-06-19	Qatar	15	153000	11.9382	100.317	4.60833	115.531	4.74954	0	0	55792.5	10.9294	25340000	17.0479	2807235	14.8477	1	1	1.80914e+06	14.4084	0	0	0	1	0	154	0	0	0	0	0	0	0	0	0	0	0	0	0	0	1	0	0	0	0	0	0	0	0
2019-06-20	Singapore	16	570544	13.2543	100.317	4.60833	114.449	4.74013	18706853	16.7444	3447425	15.0531	25340000	17.0479	5703569	15.5566	1	1	2.54598e+06	14.75	0	0	0	1	0	144	0	0	0	0	0	0	0	0	0	0	0	0	0	0	1	0	0	0	0	0	0	0	0
2019-06-21	Solomon Islands	17	10880	9.29477	100.317	4.60833	131.952	4.88244	768260	13.5519	135.051	4.91303	25340000	17.0479	674993	13.4225	1	0	3.10584e+06	14.9488	0	1	1	1	0	140	0	0	0	0	0	0	0	0	0	0	0	0	0	0	1	0	0	0	0	0	0	0	0
2019-06-22	South Africa	18	31239	10.3495	100.317	4.60833	159.214	5.07025	21307116	16.8746	16824183	16.6383	25340000	17.0479	58087055	17.8775	1	1	2.18742e+06	14.5982	0	0	0	1	0	140	0	0	0	0	0	0	0	0	0	0	0	0	0	0	1	0	0	0	0	0	0	0	0
2019-06-23	Sri Lanka	19	17580	9.77457	100.317	4.60833	155.059	5.0438	850637	13.6537	103412	11.5465	25340000	17.0479	21803000	16.8976	1	0	2.21538e+06	14.6109	0	1	1	1	0	141	0	0	0	0	0	0	0	0	0	0	0	0	0	0	1	0	0	0	0	0	0	0	0
2019-06-24	Taiwan	20	57600	10.9613	100.317	4.60833	148.093	4.99784	0	0	0	0	25340000	17.0479	23777737	16.9843	1	0	2.49793e+06	14.731	0	1	1	1	0	18	0	0	0	0	0	0	0	0	0	0	0	0	0	0	1	0	0	0	0	0	0	0	0
2019-06-25	Thailand	21	127244	11.7539	100.317	4.60833	113.588	4.73258	20232627	16.8228	5764733	15.5673	25340000	17.0479	71307763	18.0825	0	1	2.38719e+06	14.6856	0	0	0	1	0	140	0	0	0	0	0	0	0	0	0	0	0	0	0	0	1	0	0	0	0	0	0	0	0
2019-06-26	Tonga	22	2816	7.94343	100.317	4.60833	128.424	4.85533	0	0	1024.49	6.93293	25340000	17.0479	104951	11.5612	1	0	3.29898e+06	15.0091	0	1	1	1	0	140	0	0	0	0	0	0	0	0	0	0	0	0	0	0	1	0	0	0	0	0	0	0	0
2019-06-27	UK	23	121797	11.7101	100.317	4.60833	119.734	4.78527	241760019	19.3035	251000000	19.341	25340000	17.0479	9211657	16.036	1	1	1.83975e+06	14.4251	0	0	1	1	0	154	0	0	0	0	0	0	0	0	0	0	0	0	0	0	1	0	0	0	0	0	0	0	0
2019-06-28	United Arab Emirates	24	435181	12.9835	100.317	4.60833	115.409	4.74848	0	0	1598369	14.2845	25340000	17.0479	66836327	18.0178	1	1	1.69913e+06	14.3456	0	1	0	1	0	140	0	0	0	0	0	0	0	0	0	0	0	0	0	0	1	0	0	0	0	0	0	0	0
2019-06-29	USA	25	338590	12.7325	100.317	4.60833	117.467	4.76616	166866347	18.9327	116000000	18.5691	25340000	17.0479	328329953	19.6095	1	1	2.35545e+06	14.6722	0	0	0	1	0	156	0	0	0	0	0	0	0	0	0	0	0	0	0	0	1	0	0	0	0	0	0	0	0
2019-06-29	Vietnam	26	57791	10.9646	100.317	4.60833	162.688	5.09184	367117	12.8134	395480	12.8879	25340000	17.0479	95776716	18.3775	1	1	2.43923e+06	14.7072	0	0	0	1	0	179	0	0	0	0	0	0	0	0	0	0	0	0	0	0	1	0	0	0	0	0	0	0	0
2019-07-01	Brunei	1	18516	9.82644	100.356	4.60873	98.9493	4.59461	1672621	14.3299	7844.14	8.96765	25340000	17.0479	438048	12.9901	1	1	2.6268e+06	14.7813	0	0	0	1	0	144	0	0	0	0	0	0	0	0	0	0	0	0	0	0	0	1	0	0	0	0	0	1	0
2019-07-02	Canada	2	62865	11.0488	100.356	4.60873	117.63	4.76755	44270737	17.6058	8969060	16.0093	25340000	17.0479	37601230	17.4425	1	1	2.24219e+06	14.623	0	0	0	1	0	176	0	0	0	0	0	0	0	0	0	0	0	0	0	0	0	1	0	0	0	0	0	0	1
2019-07-03	Chile	3	59909	11.0006	100.356	4.60873	132.139	4.88386	2213447	14.6101	630322	13.354	25340000	17.0479	19039485	16.762	1	1	2.72558e+06	14.8182	0	0	0	1	0	163	0	0	0	0	0	0	0	0	0	0	0	0	0	0	0	1	0	0	0	0	0	0	0
2019-07-04	China	4	357297	12.7863	100.356	4.60873	124.231	4.82214	23792768	16.9849	11902820	16.2923	25340000	17.0479	1407745000	21.0653	1	1	2.36518e+06	14.6764	0	0	0	1	0	18	0	0	0	0	0	0	0	0	0	0	0	0	0	0	0	1	0	0	0	0	0	0	0
2019-07-06	Fiji	5	108207	11.5918	100.356	4.60873	131.293	4.87743	3839507	15.1609	22123.6	10.0044	25340000	17.0479	918465	13.7305	1	0	3.25977e+06	14.9972	0	1	1	1	0	140	0	0	0	0	0	0	0	0	0	0	0	0	0	0	0	1	0	0	0	0	0	0	0
2019-07-07	Hong Kong (SAR)	6	301042	12.615	100.356	4.60873	135.301	4.9075	16534595	16.621	6259222	15.6496	25340000	17.0479	7507900	15.8315	1	1	2.4499e+06	14.7116	0	0	0	1	0	144	0	0	0	0	0	0	0	0	0	0	0	0	0	0	0	1	0	0	0	0	0	0	0
2019-07-08	India	7	17920	9.79373	100.356	4.60873	171.94	5.14714	1174775	13.9766	53045516	17.7867	25340000	17.0479	1383112050	21.0476	1	1	2.08445e+06	14.55	0	0	0	1	0	141	0	0	0	0	0	0	0	0	0	0	0	0	0	0	0	1	0	0	0	0	0	0	0
2019-07-09	Indonesia	8	337000	12.7278	100.356	4.60873	152.262	5.0256	19867301	16.8046	649393	13.3838	25340000	17.0479	269582878	19.4124	1	1	2.66431e+06	14.7955	0	0	0	1	0	142	0	0	0	0	0	0	0	0	0	0	0	0	0	0	0	1	0	0	0	0	0	0	0
2019-07-10	Japan	9	154906	11.9506	100.356	4.60873	105.256	4.65639	23934242	16.9908	3293723	15.0075	25340000	17.0479	126633000	18.6568	1	0	2.52658e+06	14.7424	0	1	1	1	0	3	0	0	0	0	0	0	0	0	0	0	0	0	0	0	0	1	0	0	0	0	0	0	0
2019-07-11	Korea	10	44554	10.7045	100.356	4.60873	114.836	4.74351	9636375	16.0811	2724541	14.8178	25340000	17.0479	25755441	17.0642	0	1	2.44391e+06	14.7091	0	0	0	1	0	141	0	0	0	0	0	0	0	0	0	0	0	0	0	0	0	1	0	0	0	0	0	0	0
2019-07-12	Malaysia	11	346671	12.7561	100.356	4.60873	121.48	4.79975	9699054	16.0875	12510347	16.3421	25340000	17.0479	32804020	17.3061	1	1	2.52051e+06	14.74	0	0	0	1	0	144	0	0	0	0	0	0	0	0	0	0	0	0	0	0	0	1	0	0	0	0	0	0	0
2019-07-13	Mauritius	12	4944	8.50613	100.356	4.60873	129.601	4.86446	259668	12.4672	17470.7	9.76834	25340000	17.0479	1265711	14.0511	1	0	2.24274e+06	14.6232	0	1	1	1	0	176	0	0	0	0	0	0	0	0	0	0	0	0	0	0	0	1	0	0	0	0	0	0	0
2019-07-16	New Zealand	13	855494	13.6594	100.356	4.60873	99.3475	4.59862	119798357	18.6013	14244646	16.4719	25340000	17.0479	4979200	15.4208	1	0	3.33103e+06	15.0188	0	1	1	1	0	179	0	0	0	0	0	0	0	0	0	0	0	0	0	0	0	1	0	0	0	0	0	0	0
2019-07-18	Philippines	14	83930	11.3378	100.356	4.60873	129.654	4.86487	7374576	15.8135	1182038	13.9828	25340000	17.0479	110380804	18.5194	1	0	2.62019e+06	14.7788	0	1	1	1	0	140	0	0	0	0	0	0	0	0	0	0	0	0	0	0	0	1	0	0	0	0	0	0	0
2019-07-19	Qatar	15	158100	11.971	100.356	4.60873	115.318	4.74769	0	0	55792.5	10.9294	25340000	17.0479	2807235	14.8477	1	1	1.80914e+06	14.4084	0	0	0	1	0	154	0	0	0	0	0	0	0	0	0	0	0	0	0	0	0	1	0	0	0	0	0	0	0
2019-07-20	Singapore	16	603983	13.3113	100.356	4.60873	113.933	4.73561	18706853	16.7444	3447425	15.0531	25340000	17.0479	5703569	15.5566	1	1	2.54598e+06	14.75	0	0	0	1	0	144	0	0	0	0	0	0	0	0	0	0	0	0	0	0	0	1	0	0	0	0	0	0	0
2019-07-21	Solomon Islands	17	9424	9.15112	100.356	4.60873	132.965	4.89009	768260	13.5519	135.051	4.91303	25340000	17.0479	674993	13.4225	1	0	3.10584e+06	14.9488	0	1	1	1	0	140	0	0	0	0	0	0	0	0	0	0	0	0	0	0	0	1	0	0	0	0	0	0	0
2019-07-22	South Africa	18	37730	10.5382	100.356	4.60873	159.742	5.07356	21307116	16.8746	16824183	16.6383	25340000	17.0479	58087055	17.8775	1	1	2.18742e+06	14.5982	0	0	0	1	0	140	0	0	0	0	0	0	0	0	0	0	0	0	0	0	0	1	0	0	0	0	0	0	0
2019-07-23	Sri Lanka	19	18166	9.80736	100.356	4.60873	155.299	5.04535	850637	13.6537	103412	11.5465	25340000	17.0479	21803000	16.8976	1	0	2.21538e+06	14.6109	0	1	1	1	0	141	0	0	0	0	0	0	0	0	0	0	0	0	0	0	0	1	0	0	0	0	0	0	0
2019-07-24	Taiwan	20	59412	10.9923	100.356	4.60873	152.789	5.02906	0	0	0	0	25340000	17.0479	23777737	16.9843	1	0	2.49793e+06	14.731	0	1	1	1	0	18	0	0	0	0	0	0	0	0	0	0	0	0	0	0	0	1	0	0	0	0	0	0	0
2019-07-25	Thailand	21	143026	11.8708	100.356	4.60873	113.655	4.73316	20232627	16.8228	5764733	15.5673	25340000	17.0479	71307763	18.0825	0	1	2.38719e+06	14.6856	0	0	0	1	0	140	0	0	0	0	0	0	0	0	0	0	0	0	0	0	0	1	0	0	0	0	0	0	0
2019-07-26	Tonga	22	3344	8.11522	100.356	4.60873	128.681	4.85734	0	0	1024.49	6.93293	25340000	17.0479	104951	11.5612	1	0	3.29898e+06	15.0091	0	1	1	1	0	140	0	0	0	0	0	0	0	0	0	0	0	0	0	0	0	1	0	0	0	0	0	0	0
2019-07-27	UK	23	125395	11.7392	100.356	4.60873	119.845	4.7862	241760019	19.3035	251000000	19.341	25340000	17.0479	9211657	16.036	1	1	1.83975e+06	14.4251	0	0	1	1	0	154	0	0	0	0	0	0	0	0	0	0	0	0	0	0	0	1	0	0	0	0	0	0	0
2019-07-28	United Arab Emirates	24	445647	13.0073	100.356	4.60873	114.501	4.74058	0	0	1598369	14.2845	25340000	17.0479	66836327	18.0178	1	1	1.69913e+06	14.3456	0	1	0	1	0	140	0	0	0	0	0	0	0	0	0	0	0	0	0	0	0	1	0	0	0	0	0	0	0
2019-07-29	USA	25	355301	12.7807	100.356	4.60873	117.663	4.76783	166866347	18.9327	116000000	18.5691	25340000	17.0479	328329953	19.6095	1	1	2.35545e+06	14.6722	0	0	0	1	0	156	0	0	0	0	0	0	0	0	0	0	0	0	0	0	0	1	0	0	0	0	0	0	0
2019-07-31	Vietnam	26	63000	11.0509	100.356	4.60873	162.984	5.09365	367117	12.8134	395480	12.8879	25340000	17.0479	95776716	18.3775	1	1	2.43923e+06	14.7072	0	0	0	1	0	179	0	0	0	0	0	0	0	0	0	0	0	0	0	0	0	1	0	0	0	0	0	0	0
2019-08-01	Brunei	1	20432	9.92491	100.399	4.60915	98.6452	4.59153	1672621	14.3299	7844.14	8.96765	25340000	17.0479	438048	12.9901	1	1	2.6268e+06	14.7813	0	0	0	1	0	144	0	0	0	0	0	0	0	0	0	0	0	0	0	0	0	0	1	0	0	0	0	1	0
2019-08-02	Canada	2	62539	11.0436	100.399	4.60915	117.459	4.76609	44270737	17.6058	8969060	16.0093	25340000	17.0479	37601230	17.4425	1	1	2.24219e+06	14.623	0	0	0	1	0	176	0	0	0	0	0	0	0	0	0	0	0	0	0	0	0	0	1	0	0	0	0	0	1
2019-08-03	Chile	3	56496	10.9419	100.399	4.60915	132.384	4.88571	2213447	14.6101	630322	13.354	25340000	17.0479	19039485	16.762	1	1	2.72558e+06	14.8182	0	0	0	1	0	163	0	0	0	0	0	0	0	0	0	0	0	0	0	0	0	0	1	0	0	0	0	0	0
2019-08-04	China	4	358424	12.7895	100.399	4.60915	125.15	4.82951	23792768	16.9849	11902820	16.2923	25340000	17.0479	1407745000	21.0653	1	1	2.36518e+06	14.6764	0	0	0	1	0	18	0	0	0	0	0	0	0	0	0	0	0	0	0	0	0	0	1	0	0	0	0	0	0
2019-08-06	Fiji	5	95693	11.4689	100.399	4.60915	132.096	4.88353	3839507	15.1609	22123.6	10.0044	25340000	17.0479	918465	13.7305	1	0	3.25977e+06	14.9972	0	1	1	1	0	140	0	0	0	0	0	0	0	0	0	0	0	0	0	0	0	0	1	0	0	0	0	0	0
2019-08-07	Hong Kong (SAR)	6	295189	12.5954	100.399	4.60915	135.571	4.9095	16534595	16.621	6259222	15.6496	25340000	17.0479	7507900	15.8315	1	1	2.4499e+06	14.7116	0	0	0	1	0	144	0	0	0	0	0	0	0	0	0	0	0	0	0	0	0	0	1	0	0	0	0	0	0
2019-08-08	India	7	18432	9.8219	100.399	4.60915	172.893	5.15268	1174775	13.9766	53045516	17.7867	25340000	17.0479	1383112050	21.0476	1	1	2.08445e+06	14.55	0	0	0	1	0	141	0	0	0	0	0	0	0	0	0	0	0	0	0	0	0	0	1	0	0	0	0	0	0
2019-08-09	Indonesia	8	326633	12.6966	100.399	4.60915	152.437	5.02675	19867301	16.8046	649393	13.3838	25340000	17.0479	269582878	19.4124	1	1	2.66431e+06	14.7955	0	0	0	1	0	142	0	0	0	0	0	0	0	0	0	0	0	0	0	0	0	0	1	0	0	0	0	0	0
2019-08-10	Japan	9	161822	11.9943	100.399	4.60915	105.467	4.6584	23934242	16.9908	3293723	15.0075	25340000	17.0479	126633000	18.6568	1	0	2.52658e+06	14.7424	0	1	1	1	0	3	0	0	0	0	0	0	0	0	0	0	0	0	0	0	0	0	1	0	0	0	0	0	0
2019-08-11	Korea	10	44798	10.7099	100.399	4.60915	115.112	4.7459	9636375	16.0811	2724541	14.8178	25340000	17.0479	25755441	17.0642	0	1	2.44391e+06	14.7091	0	0	0	1	0	141	0	0	0	0	0	0	0	0	0	0	0	0	0	0	0	0	1	0	0	0	0	0	0
2019-08-12	Malaysia	11	311404	12.6488	100.399	4.60915	121.78	4.80221	9699054	16.0875	12510347	16.3421	25340000	17.0479	32804020	17.3061	1	1	2.52051e+06	14.74	0	0	0	1	0	144	0	0	0	0	0	0	0	0	0	0	0	0	0	0	0	0	1	0	0	0	0	0	0
2019-08-13	Mauritius	12	4368	8.38229	100.399	4.60915	129.977	4.86736	259668	12.4672	17470.7	9.76834	25340000	17.0479	1265711	14.0511	1	0	2.24274e+06	14.6232	0	1	1	1	0	176	0	0	0	0	0	0	0	0	0	0	0	0	0	0	0	0	1	0	0	0	0	0	0
2019-08-16	New Zealand	13	796753	13.5883	100.399	4.60915	99.2682	4.59783	119798357	18.6013	14244646	16.4719	25340000	17.0479	4979200	15.4208	1	0	3.33103e+06	15.0188	0	1	1	1	0	179	0	0	0	0	0	0	0	0	0	0	0	0	0	0	0	0	1	0	0	0	0	0	0
2019-08-18	Philippines	14	80003	11.2898	100.399	4.60915	129.78	4.86584	7374576	15.8135	1182038	13.9828	25340000	17.0479	110380804	18.5194	1	0	2.62019e+06	14.7788	0	1	1	1	0	140	0	0	0	0	0	0	0	0	0	0	0	0	0	0	0	0	1	0	0	0	0	0	0
2019-08-19	Qatar	15	158100	11.971	100.399	4.60915	116.674	4.75938	0	0	55792.5	10.9294	25340000	17.0479	2807235	14.8477	1	1	1.80914e+06	14.4084	0	0	0	1	0	154	0	0	0	0	0	0	0	0	0	0	0	0	0	0	0	0	1	0	0	0	0	0	0
2019-08-20	Singapore	16	568478	13.2507	100.399	4.60915	114.645	4.74184	18706853	16.7444	3447425	15.0531	25340000	17.0479	5703569	15.5566	1	1	2.54598e+06	14.75	0	0	0	1	0	144	0	0	0	0	0	0	0	0	0	0	0	0	0	0	0	0	1	0	0	0	0	0	0
2019-08-21	Solomon Islands	17	9696	9.17957	100.399	4.60915	133.092	4.89104	768260	13.5519	135.051	4.91303	25340000	17.0479	674993	13.4225	1	0	3.10584e+06	14.9488	0	1	1	1	0	140	0	0	0	0	0	0	0	0	0	0	0	0	0	0	0	0	1	0	0	0	0	0	0
2019-08-22	South Africa	18	35148	10.4674	100.399	4.60915	160.094	5.07576	21307116	16.8746	16824183	16.6383	25340000	17.0479	58087055	17.8775	1	1	2.18742e+06	14.5982	0	0	0	1	0	140	0	0	0	0	0	0	0	0	0	0	0	0	0	0	0	0	1	0	0	0	0	0	0
2019-08-23	Sri Lanka	19	18166	9.80736	100.399	4.60915	155.659	5.04767	850637	13.6537	103412	11.5465	25340000	17.0479	21803000	16.8976	1	0	2.21538e+06	14.6109	0	1	1	1	0	141	0	0	0	0	0	0	0	0	0	0	0	0	0	0	0	0	1	0	0	0	0	0	0
2019-08-24	Taiwan	20	67452	11.1192	100.399	4.60915	152.789	5.02906	0	0	0	0	25340000	17.0479	23777737	16.9843	1	0	2.49793e+06	14.731	0	1	1	1	0	18	0	0	0	0	0	0	0	0	0	0	0	0	0	0	0	0	1	0	0	0	0	0	0
2019-08-25	Thailand	21	137262	11.8297	100.399	4.60915	113.434	4.73122	20232627	16.8228	5764733	15.5673	25340000	17.0479	71307763	18.0825	0	1	2.38719e+06	14.6856	0	0	0	1	0	140	0	0	0	0	0	0	0	0	0	0	0	0	0	0	0	0	1	0	0	0	0	0	0
2019-08-26	Tonga	22	2992	8.00403	100.399	4.60915	129.324	4.86232	0	0	1024.49	6.93293	25340000	17.0479	104951	11.5612	1	0	3.29898e+06	15.0091	0	1	1	1	0	140	0	0	0	0	0	0	0	0	0	0	0	0	0	0	0	0	1	0	0	0	0	0	0
2019-08-27	UK	23	125806	11.7425	100.399	4.60915	120.178	4.78897	241760019	19.3035	251000000	19.341	25340000	17.0479	9211657	16.036	1	1	1.83975e+06	14.4251	0	0	1	1	0	154	0	0	0	0	0	0	0	0	0	0	0	0	0	0	0	0	1	0	0	0	0	0	0
2019-08-28	United Arab Emirates	24	446401	13.009	100.399	4.60915	114.878	4.74387	0	0	1598369	14.2845	25340000	17.0479	66836327	18.0178	1	1	1.69913e+06	14.3456	0	1	0	1	0	140	0	0	0	0	0	0	0	0	0	0	0	0	0	0	0	0	1	0	0	0	0	0	0
2019-08-29	USA	25	341749	12.7418	100.399	4.60915	117.657	4.76778	166866347	18.9327	116000000	18.5691	25340000	17.0479	328329953	19.6095	1	1	2.35545e+06	14.6722	0	0	0	1	0	156	0	0	0	0	0	0	0	0	0	0	0	0	0	0	0	0	1	0	0	0	0	0	0
2019-08-31	Vietnam	26	58186	10.9714	100.399	4.60915	163.44	5.09645	367117	12.8134	395480	12.8879	25340000	17.0479	95776716	18.3775	1	1	2.43923e+06	14.7072	0	0	0	1	0	179	0	0	0	0	0	0	0	0	0	0	0	0	0	0	0	0	1	0	0	0	0	0	0
2019-09-01	Brunei	1	20340	9.92039	100.437	4.60953	99.3455	4.5986	1672621	14.3299	7844.14	8.96765	25340000	17.0479	438048	12.9901	1	1	2.6268e+06	14.7813	0	0	0	1	0	144	0	0	0	0	0	0	0	0	0	0	0	0	0	0	0	0	0	1	0	0	0	1	0
2019-09-02	Canada	2	61507	11.0269	100.437	4.60953	116.943	4.76169	44270737	17.6058	8969060	16.0093	25340000	17.0479	37601230	17.4425	1	1	2.24219e+06	14.623	0	0	0	1	0	176	0	0	0	0	0	0	0	0	0	0	0	0	0	0	0	0	0	1	0	0	0	0	1
2019-09-03	Chile	3	49978	10.8194	100.437	4.60953	132.397	4.88581	2213447	14.6101	630322	13.354	25340000	17.0479	19039485	16.762	1	1	2.72558e+06	14.8182	0	0	0	1	0	163	0	0	0	0	0	0	0	0	0	0	0	0	0	0	0	0	0	1	0	0	0	0	0
2019-09-04	China	4	325886	12.6943	100.437	4.60953	126.184	4.83775	23792768	16.9849	11902820	16.2923	25340000	17.0479	1407745000	21.0653	1	1	2.36518e+06	14.6764	0	0	0	1	0	18	0	0	0	0	0	0	0	0	0	0	0	0	0	0	0	0	0	1	0	0	0	0	0
2019-09-06	Fiji	5	96135	11.4735	100.437	4.60953	131.637	4.88005	3839507	15.1609	22123.6	10.0044	25340000	17.0479	918465	13.7305	1	0	3.25977e+06	14.9972	0	1	1	1	0	140	0	0	0	0	0	0	0	0	0	0	0	0	0	0	0	0	0	1	0	0	0	0	0
2019-09-07	Hong Kong (SAR)	6	278878	12.5385	100.437	4.60953	135.571	4.9095	16534595	16.621	6259222	15.6496	25340000	17.0479	7507900	15.8315	1	1	2.4499e+06	14.7116	0	0	0	1	0	144	0	0	0	0	0	0	0	0	0	0	0	0	0	0	0	0	0	1	0	0	0	0	0
2019-09-08	India	7	17408	9.76474	100.437	4.60953	173.847	5.15818	1174775	13.9766	53045516	17.7867	25340000	17.0479	1383112050	21.0476	1	1	2.08445e+06	14.55	0	0	0	1	0	141	0	0	0	0	0	0	0	0	0	0	0	0	0	0	0	0	0	1	0	0	0	0	0
2019-09-09	Indonesia	8	310963	12.6474	100.437	4.60953	152.02	5.02401	19867301	16.8046	649393	13.3838	25340000	17.0479	269582878	19.4124	1	1	2.66431e+06	14.7955	0	0	0	1	0	142	0	0	0	0	0	0	0	0	0	0	0	0	0	0	0	0	0	1	0	0	0	0	0
2019-09-10	Japan	9	156750	11.9624	100.437	4.60953	105.572	4.65939	23934242	16.9908	3293723	15.0075	25340000	17.0479	126633000	18.6568	1	0	2.52658e+06	14.7424	0	1	1	1	0	3	0	0	0	0	0	0	0	0	0	0	0	0	0	0	0	0	0	1	0	0	0	0	0
2019-09-11	Korea	10	43932	10.6904	100.437	4.60953	115.539	4.74961	9636375	16.0811	2724541	14.8178	25340000	17.0479	25755441	17.0642	0	1	2.44391e+06	14.7091	0	0	0	1	0	141	0	0	0	0	0	0	0	0	0	0	0	0	0	0	0	0	0	1	0	0	0	0	0
2019-09-12	Malaysia	11	309820	12.6437	100.437	4.60953	121.78	4.80221	9699054	16.0875	12510347	16.3421	25340000	17.0479	32804020	17.3061	1	1	2.52051e+06	14.74	0	0	0	1	0	144	0	0	0	0	0	0	0	0	0	0	0	0	0	0	0	0	0	1	0	0	0	0	0
2019-09-13	Mauritius	12	4914	8.50005	100.437	4.60953	129.099	4.86058	259668	12.4672	17470.7	9.76834	25340000	17.0479	1265711	14.0511	1	0	2.24274e+06	14.6232	0	1	1	1	0	176	0	0	0	0	0	0	0	0	0	0	0	0	0	0	0	0	0	1	0	0	0	0	0
2019-09-16	New Zealand	13	788104	13.5774	100.437	4.60953	1	0	119798357	18.6013	14244646	16.4719	25340000	17.0479	4979200	15.4208	1	0	3.33103e+06	15.0188	0	1	1	1	0	179	0	0	0	0	0	0	0	0	0	0	0	0	0	0	0	0	0	1	0	0	0	0	0
2019-09-18	Philippines	14	80605	11.2973	100.437	4.60953	129.907	4.86682	7374576	15.8135	1182038	13.9828	25340000	17.0479	110380804	18.5194	1	0	2.62019e+06	14.7788	0	1	1	1	0	140	0	0	0	0	0	0	0	0	0	0	0	0	0	0	0	0	0	1	0	0	0	0	0
2019-09-19	Qatar	15	150548	11.922	100.437	4.60953	115.798	4.75185	0	0	55792.5	10.9294	25340000	17.0479	2807235	14.8477	1	1	1.80914e+06	14.4084	0	0	0	1	0	154	0	0	0	0	0	0	0	0	0	0	0	0	0	0	0	0	0	1	0	0	0	0	0
2019-09-20	Singapore	16	560548	13.2367	100.437	4.60953	114.574	4.74122	18706853	16.7444	3447425	15.0531	25340000	17.0479	5703569	15.5566	1	1	2.54598e+06	14.75	0	0	0	1	0	144	0	0	0	0	0	0	0	0	0	0	0	0	0	0	0	0	0	1	0	0	0	0	0
2019-09-21	Solomon Islands	17	9208	9.12794	100.437	4.60953	133.598	4.89484	768260	13.5519	135.051	4.91303	25340000	17.0479	674993	13.4225	1	0	3.10584e+06	14.9488	0	1	1	1	0	140	0	0	0	0	0	0	0	0	0	0	0	0	0	0	0	0	0	1	0	0	0	0	0
2019-09-22	South Africa	18	33182	10.4098	100.437	4.60953	160.622	5.07905	21307116	16.8746	16824183	16.6383	25340000	17.0479	58087055	17.8775	1	1	2.18742e+06	14.5982	0	0	0	1	0	140	0	0	0	0	0	0	0	0	0	0	0	0	0	0	0	0	0	1	0	0	0	0	0
2019-09-23	Sri Lanka	19	17580	9.77457	100.437	4.60953	156.739	5.05458	850637	13.6537	103412	11.5465	25340000	17.0479	21803000	16.8976	1	0	2.21538e+06	14.6109	0	1	1	1	0	141	0	0	0	0	0	0	0	0	0	0	0	0	0	0	0	0	0	1	0	0	0	0	0
2019-09-24	Taiwan	20	61608	11.0286	100.437	4.60953	161.931	5.08717	0	0	0	0	25340000	17.0479	23777737	16.9843	1	0	2.49793e+06	14.731	0	1	1	1	0	18	0	0	0	0	0	0	0	0	0	0	0	0	0	0	0	0	0	1	0	0	0	0	0
2019-09-25	Thailand	21	135198	11.8145	100.437	4.60953	113.544	4.73219	20232627	16.8228	5764733	15.5673	25340000	17.0479	71307763	18.0825	0	1	2.38719e+06	14.6856	0	0	0	1	0	140	0	0	0	0	0	0	0	0	0	0	0	0	0	0	0	0	0	1	0	0	0	0	0
2019-09-26	Tonga	22	2992	8.00403	100.437	4.60953	129.196	4.86133	0	0	1024.49	6.93293	25340000	17.0479	104951	11.5612	1	0	3.29898e+06	15.0091	0	1	1	1	0	140	0	0	0	0	0	0	0	0	0	0	0	0	0	0	0	0	0	1	0	0	0	0	0
2019-09-27	UK	23	119533	11.6914	100.437	4.60953	120.289	4.78989	241760019	19.3035	251000000	19.341	25340000	17.0479	9211657	16.036	1	1	1.83975e+06	14.4251	0	0	1	1	0	154	0	0	0	0	0	0	0	0	0	0	0	0	0	0	0	0	0	1	0	0	0	0	0
2019-09-28	United Arab Emirates	24	432286	12.9768	100.437	4.60953	114.03	4.73646	0	0	1598369	14.2845	25340000	17.0479	66836327	18.0178	1	1	1.69913e+06	14.3456	0	1	0	1	0	140	0	0	0	0	0	0	0	0	0	0	0	0	0	0	0	0	0	1	0	0	0	0	0
2019-09-29	USA	25	341036	12.7397	100.437	4.60953	117.749	4.76856	166866347	18.9327	116000000	18.5691	25340000	17.0479	328329953	19.6095	1	1	2.35545e+06	14.6722	0	0	0	1	0	156	0	0	0	0	0	0	0	0	0	0	0	0	0	0	0	0	0	1	0	0	0	0	0
2019-09-16	Vietnam	26	56390	10.9401	100.437	4.60953	163.956	5.0996	367117	12.8134	395480	12.8879	25340000	17.0479	95776716	18.3775	1	1	2.43923e+06	14.7072	0	0	0	1	0	179	0	0	0	0	0	0	0	0	0	0	0	0	0	0	0	0	0	1	0	0	0	0	0
2019-10-01	Brunei	1	21148	9.95935	100.466	4.60982	99.1883	4.59702	1672621	14.3299	7844.14	8.96765	25340000	17.0479	438048	12.9901	1	1	2.6268e+06	14.7813	0	0	0	1	0	144	0	0	0	0	0	0	0	0	0	0	0	0	0	0	0	0	0	0	1	0	0	1	0
2019-10-02	Canada	2	60100	11.0038	100.466	4.60982	117.287	4.76462	44270737	17.6058	8969060	16.0093	25340000	17.0479	37601230	17.4425	1	1	2.24219e+06	14.623	0	0	0	1	0	176	0	0	0	0	0	0	0	0	0	0	0	0	0	0	0	0	0	0	1	0	0	0	1
2019-10-03	Chile	3	49422	10.8082	100.466	4.60982	133.481	4.89396	2213447	14.6101	630322	13.354	25340000	17.0479	19039485	16.762	1	1	2.72558e+06	14.8182	0	0	0	1	0	163	0	0	0	0	0	0	0	0	0	0	0	0	0	0	0	0	0	0	1	0	0	0	0
2019-10-04	China	4	350669	12.7676	100.466	4.60982	127.334	4.84681	23792768	16.9849	11902820	16.2923	25340000	17.0479	1407745000	21.0653	1	1	2.36518e+06	14.6764	0	0	0	1	0	18	0	0	0	0	0	0	0	0	0	0	0	0	0	0	0	0	0	0	1	0	0	0	0
2019-10-06	Fiji	5	102338	11.536	100.466	4.60982	130.719	4.87305	3839507	15.1609	22123.6	10.0044	25340000	17.0479	918465	13.7305	1	0	3.25977e+06	14.9972	0	1	1	1	0	140	0	0	0	0	0	0	0	0	0	0	0	0	0	0	0	0	0	0	1	0	0	0	0
2019-10-07	Hong Kong (SAR)	6	292500	12.5862	100.466	4.60982	135.977	4.91248	16534595	16.621	6259222	15.6496	25340000	17.0479	7507900	15.8315	1	1	2.4499e+06	14.7116	0	0	0	1	0	144	0	0	0	0	0	0	0	0	0	0	0	0	0	0	0	0	0	0	1	0	0	0	0
2019-10-08	India	7	17920	9.79373	100.466	4.60982	175.517	5.16773	1174775	13.9766	53045516	17.7867	25340000	17.0479	1383112050	21.0476	1	1	2.08445e+06	14.55	0	0	0	1	0	141	0	0	0	0	0	0	0	0	0	0	0	0	0	0	0	0	0	0	1	0	0	0	0
2019-10-09	Indonesia	8	312937	12.6538	100.466	4.60982	152.053	5.02423	19867301	16.8046	649393	13.3838	25340000	17.0479	269582878	19.4124	1	1	2.66431e+06	14.7955	0	0	0	1	0	142	0	0	0	0	0	0	0	0	0	0	0	0	0	0	0	0	0	0	1	0	0	0	0
2019-10-10	Japan	9	160945	11.9888	100.466	4.60982	105.889	4.66239	23934242	16.9908	3293723	15.0075	25340000	17.0479	126633000	18.6568	1	0	2.52658e+06	14.7424	0	1	1	1	0	3	0	0	0	0	0	0	0	0	0	0	0	0	0	0	0	0	0	0	1	0	0	0	0
2019-10-11	Korea	10	49042	10.8005	100.466	4.60982	115.825	4.75208	9636375	16.0811	2724541	14.8178	25340000	17.0479	25755441	17.0642	0	1	2.44391e+06	14.7091	0	0	0	1	0	141	0	0	0	0	0	0	0	0	0	0	0	0	0	0	0	0	0	0	1	0	0	0	0
2019-10-12	Malaysia	11	321144	12.6796	100.466	4.60982	121.98	4.80385	9699054	16.0875	12510347	16.3421	25340000	17.0479	32804020	17.3061	1	1	2.52051e+06	14.74	0	0	0	1	0	144	0	0	0	0	0	0	0	0	0	0	0	0	0	0	0	0	0	0	1	0	0	0	0
2019-10-13	Mauritius	12	5004	8.51819	100.466	4.60982	128.473	4.85572	259668	12.4672	17470.7	9.76834	25340000	17.0479	1265711	14.0511	1	0	2.24274e+06	14.6232	0	1	1	1	0	176	0	0	0	0	0	0	0	0	0	0	0	0	0	0	0	0	0	0	1	0	0	0	0
2019-10-16	New Zealand	13	819420	13.6164	100.466	4.60982	1	0	119798357	18.6013	14244646	16.4719	25340000	17.0479	4979200	15.4208	1	0	3.33103e+06	15.0188	0	1	1	1	0	179	0	0	0	0	0	0	0	0	0	0	0	0	0	0	0	0	0	0	1	0	0	0	0
2019-10-18	Philippines	14	84305	11.3422	100.466	4.60982	130.287	4.86974	7374576	15.8135	1182038	13.9828	25340000	17.0479	110380804	18.5194	1	0	2.62019e+06	14.7788	0	1	1	1	0	140	0	0	0	0	0	0	0	0	0	0	0	0	0	0	0	0	0	0	1	0	0	0	0
2019-10-19	Qatar	15	147420	11.901	100.466	4.60982	114.837	4.74351	0	0	55792.5	10.9294	25340000	17.0479	2807235	14.8477	1	1	1.80914e+06	14.4084	0	0	0	1	0	154	0	0	0	0	0	0	0	0	0	0	0	0	0	0	0	0	0	0	1	0	0	0	0
2019-10-20	Singapore	16	592432	13.292	100.466	4.60982	114.326	4.73905	18706853	16.7444	3447425	15.0531	25340000	17.0479	5703569	15.5566	1	1	2.54598e+06	14.75	0	0	0	1	0	144	0	0	0	0	0	0	0	0	0	0	0	0	0	0	0	0	0	0	1	0	0	0	0
2019-10-21	Solomon Islands	17	9912	9.2016	100.466	4.60982	134.991	4.90521	768260	13.5519	135.051	4.91303	25340000	17.0479	674993	13.4225	1	0	3.10584e+06	14.9488	0	1	1	1	0	140	0	0	0	0	0	0	0	0	0	0	0	0	0	0	0	0	0	0	1	0	0	0	0
2019-10-22	South Africa	18	32629	10.393	100.466	4.60982	160.622	5.07905	21307116	16.8746	16824183	16.6383	25340000	17.0479	58087055	17.8775	1	1	2.18742e+06	14.5982	0	0	0	1	0	140	0	0	0	0	0	0	0	0	0	0	0	0	0	0	0	0	0	0	1	0	0	0	0
2019-10-23	Sri Lanka	19	18166	9.80736	100.466	4.60982	158.299	5.06449	850637	13.6537	103412	11.5465	25340000	17.0479	21803000	16.8976	1	0	2.21538e+06	14.6109	0	1	1	1	0	141	0	0	0	0	0	0	0	0	0	0	0	0	0	0	0	0	0	0	1	0	0	0	0
2019-10-24	Taiwan	20	61314	11.0238	100.466	4.60982	161.931	5.08717	0	0	0	0	25340000	17.0479	23777737	16.9843	1	0	2.49793e+06	14.731	0	1	1	1	0	18	0	0	0	0	0	0	0	0	0	0	0	0	0	0	0	0	0	0	1	0	0	0	0
2019-10-25	Thailand	21	142081	11.8642	100.466	4.60982	113.368	4.73064	20232627	16.8228	5764733	15.5673	25340000	17.0479	71307763	18.0825	0	1	2.38719e+06	14.6856	0	0	0	1	0	140	0	0	0	0	0	0	0	0	0	0	0	0	0	0	0	0	0	0	1	0	0	0	0
2019-10-26	Tonga	22	3344	8.11522	100.466	4.60982	129.839	4.8663	0	0	1024.49	6.93293	25340000	17.0479	104951	11.5612	1	0	3.29898e+06	15.0091	0	1	1	1	0	140	0	0	0	0	0	0	0	0	0	0	0	0	0	0	0	0	0	0	1	0	0	0	0
2019-10-27	UK	23	123970	11.7278	100.466	4.60982	120.178	4.78897	241760019	19.3035	251000000	19.341	25340000	17.0479	9211657	16.036	1	1	1.83975e+06	14.4251	0	0	1	1	0	154	0	0	0	0	0	0	0	0	0	0	0	0	0	0	0	0	0	0	1	0	0	0	0
2019-10-28	United Arab Emirates	24	446348	13.0089	100.466	4.60982	113.845	4.73484	0	0	1598369	14.2845	25340000	17.0479	66836327	18.0178	1	1	1.69913e+06	14.3456	0	1	0	1	0	140	0	0	0	0	0	0	0	0	0	0	0	0	0	0	0	0	0	0	1	0	0	0	0
2019-10-29	USA	25	352384	12.7725	100.466	4.60982	118.019	4.77084	166866347	18.9327	116000000	18.5691	25340000	17.0479	328329953	19.6095	1	1	2.35545e+06	14.6722	0	0	0	1	0	156	0	0	0	0	0	0	0	0	0	0	0	0	0	0	0	0	0	0	1	0	0	0	0
2019-10-31	Vietnam	26	58034	10.9688	100.466	4.60982	164.915	5.10543	367117	12.8134	395480	12.8879	25340000	17.0479	95776716	18.3775	1	1	2.43923e+06	14.7072	0	0	0	1	0	179	0	0	0	0	0	0	0	0	0	0	0	0	0	0	0	0	0	0	1	0	0	0	0
2019-11-01	Brunei	1	20340	9.92039	100.484	4.61	99.2554	4.5977	1672621	14.3299	7844.14	8.96765	25340000	17.0479	438048	12.9901	1	1	2.6268e+06	14.7813	0	0	0	1	0	144	0	0	0	0	0	0	0	0	0	0	0	0	0	0	0	0	0	0	0	1	0	1	0
2019-11-02	Canada	2	41938	10.644	100.484	4.61	117.115	4.76316	44270737	17.6058	8969060	16.0093	25340000	17.0479	37601230	17.4425	1	1	2.24219e+06	14.623	0	0	0	1	0	176	0	0	0	0	0	0	0	0	0	0	0	0	0	0	0	0	0	0	0	1	0	0	1
2019-11-03	Chile	3	47111	10.7603	100.484	4.61	133.584	4.89473	2213447	14.6101	630322	13.354	25340000	17.0479	19039485	16.762	1	1	2.72558e+06	14.8182	0	0	0	1	0	163	0	0	0	0	0	0	0	0	0	0	0	0	0	0	0	0	0	0	0	1	0	0	0
2019-11-04	China	4	400119	12.8995	100.484	4.61	127.793	4.85041	23792768	16.9849	11902820	16.2923	25340000	17.0479	1407745000	21.0653	1	1	2.36518e+06	14.6764	0	0	0	1	0	18	0	0	0	0	0	0	0	0	0	0	0	0	0	0	0	0	0	0	0	1	0	0	0
2019-11-06	Fiji	5	92472	11.4347	100.484	4.61	130.949	4.87481	3839507	15.1609	22123.6	10.0044	25340000	17.0479	918465	13.7305	1	0	3.25977e+06	14.9972	0	1	1	1	0	140	0	0	0	0	0	0	0	0	0	0	0	0	0	0	0	0	0	0	0	1	0	0	0
2019-11-07	Hong Kong (SAR)	6	262004	12.4761	100.484	4.61	136.112	4.91348	16534595	16.621	6259222	15.6496	25340000	17.0479	7507900	15.8315	1	1	2.4499e+06	14.7116	0	0	0	1	0	144	0	0	0	0	0	0	0	0	0	0	0	0	0	0	0	0	0	0	0	1	0	0	0
2019-11-08	India	7	17920	9.79373	100.484	4.61	177.186	5.1772	1174775	13.9766	53045516	17.7867	25340000	17.0479	1383112050	21.0476	1	1	2.08445e+06	14.55	0	0	0	1	0	141	0	0	0	0	0	0	0	0	0	0	0	0	0	0	0	0	0	0	0	1	0	0	0
2019-11-09	Indonesia	8	303631	12.6236	100.484	4.61	152.273	5.02567	19867301	16.8046	649393	13.3838	25340000	17.0479	269582878	19.4124	1	1	2.66431e+06	14.7955	0	0	0	1	0	142	0	0	0	0	0	0	0	0	0	0	0	0	0	0	0	0	0	0	0	1	0	0	0
2019-11-10	Japan	9	169762	12.0422	100.484	4.61	105.994	4.66338	23934242	16.9908	3293723	15.0075	25340000	17.0479	126633000	18.6568	1	0	2.52658e+06	14.7424	0	1	1	1	0	3	0	0	0	0	0	0	0	0	0	0	0	0	0	0	0	0	0	0	0	1	0	0	0
2019-11-11	Korea	10	70260	11.16	100.484	4.61	115.176	4.74647	9636375	16.0811	2724541	14.8178	25340000	17.0479	25755441	17.0642	0	1	2.44391e+06	14.7091	0	0	0	1	0	141	0	0	0	0	0	0	0	0	0	0	0	0	0	0	0	0	0	0	0	1	0	0	0
2019-11-12	Malaysia	11	304885	12.6277	100.484	4.61	122.08	4.80467	9699054	16.0875	12510347	16.3421	25340000	17.0479	32804020	17.3061	1	1	2.52051e+06	14.74	0	0	0	1	0	144	0	0	0	0	0	0	0	0	0	0	0	0	0	0	0	0	0	0	0	1	0	0	0
2019-11-13	Mauritius	12	4428	8.39593	100.484	4.61	129.225	4.86155	259668	12.4672	17470.7	9.76834	25340000	17.0479	1265711	14.0511	1	0	2.24274e+06	14.6232	0	1	1	1	0	176	0	0	0	0	0	0	0	0	0	0	0	0	0	0	0	0	0	0	0	1	0	0	0
2019-11-16	New Zealand	13	787522	13.5766	100.484	4.61	1	0	119798357	18.6013	14244646	16.4719	25340000	17.0479	4979200	15.4208	1	0	3.33103e+06	15.0188	0	1	1	1	0	179	0	0	0	0	0	0	0	0	0	0	0	0	0	0	0	0	0	0	0	1	0	0	0
2019-11-18	Philippines	14	85836	11.3602	100.484	4.61	130.667	4.87265	7374576	15.8135	1182038	13.9828	25340000	17.0479	110380804	18.5194	1	0	2.62019e+06	14.7788	0	1	1	1	0	140	0	0	0	0	0	0	0	0	0	0	0	0	0	0	0	0	0	0	0	1	0	0	0
2019-11-19	Qatar	15	138192	11.8364	100.484	4.61	115.093	4.74574	0	0	55792.5	10.9294	25340000	17.0479	2807235	14.8477	1	1	1.80914e+06	14.4084	0	0	0	1	0	154	0	0	0	0	0	0	0	0	0	0	0	0	0	0	0	0	0	0	0	1	0	0	0
2019-11-20	Singapore	16	589764	13.2875	100.484	4.61	114.696	4.74229	18706853	16.7444	3447425	15.0531	25340000	17.0479	5703569	15.5566	1	1	2.54598e+06	14.75	0	0	0	1	0	144	0	0	0	0	0	0	0	0	0	0	0	0	0	0	0	0	0	0	0	1	0	0	0
2019-11-21	Solomon Islands	17	9480	9.15705	100.484	4.61	135.371	4.90802	768260	13.5519	135.051	4.91303	25340000	17.0479	674993	13.4225	1	0	3.10584e+06	14.9488	0	1	1	1	0	140	0	0	0	0	0	0	0	0	0	0	0	0	0	0	0	0	0	0	0	1	0	0	0
2019-11-22	South Africa	18	31283	10.3509	100.484	4.61	160.798	5.08015	21307116	16.8746	16824183	16.6383	25340000	17.0479	58087055	17.8775	1	1	2.18742e+06	14.5982	0	0	0	1	0	140	0	0	0	0	0	0	0	0	0	0	0	0	0	0	0	0	0	0	0	1	0	0	0
2019-11-23	Sri Lanka	19	17580	9.77457	100.484	4.61	159.499	5.07204	850637	13.6537	103412	11.5465	25340000	17.0479	21803000	16.8976	1	0	2.21538e+06	14.6109	0	1	1	1	0	141	0	0	0	0	0	0	0	0	0	0	0	0	0	0	0	0	0	0	0	1	0	0	0
2019-11-24	Taiwan	20	58752	10.9811	100.484	4.61	161.931	5.08717	0	0	0	0	25340000	17.0479	23777737	16.9843	1	0	2.49793e+06	14.731	0	1	1	1	0	18	0	0	0	0	0	0	0	0	0	0	0	0	0	0	0	0	0	0	0	1	0	0	0
2019-11-25	Thailand	21	142704	11.8685	100.484	4.61	113.224	4.72937	20232627	16.8228	5764733	15.5673	25340000	17.0479	71307763	18.0825	0	1	2.38719e+06	14.6856	0	0	0	1	0	140	0	0	0	0	0	0	0	0	0	0	0	0	0	0	0	0	0	0	0	1	0	0	0
2019-11-26	Tonga	22	2816	7.94343	100.484	4.61	129.196	4.86133	0	0	1024.49	6.93293	25340000	17.0479	104951	11.5612	1	0	3.29898e+06	15.0091	0	1	1	1	0	140	0	0	0	0	0	0	0	0	0	0	0	0	0	0	0	0	0	0	0	1	0	0	0
2019-11-27	UK	23	114138	11.6452	100.484	4.61	120.399	4.79082	241760019	19.3035	251000000	19.341	25340000	17.0479	9211657	16.036	1	1	1.83975e+06	14.4251	0	0	1	1	0	154	0	0	0	0	0	0	0	0	0	0	0	0	0	0	0	0	0	0	0	1	0	0	0
2019-11-28	United Arab Emirates	24	411008	12.9264	100.484	4.61	113.985	4.73607	0	0	1598369	14.2845	25340000	17.0479	66836327	18.0178	1	1	1.69913e+06	14.3456	0	1	0	1	0	140	0	0	0	0	0	0	0	0	0	0	0	0	0	0	0	0	0	0	0	1	0	0	0
2019-11-29	USA	25	326100	12.695	100.484	4.61	117.955	4.77031	166866347	18.9327	116000000	18.5691	25340000	17.0479	328329953	19.6095	1	1	2.35545e+06	14.6722	0	0	0	1	0	156	0	0	0	0	0	0	0	0	0	0	0	0	0	0	0	0	0	0	0	1	0	0	0
2019-11-29	Vietnam	26	55872	10.9308	100.484	4.61	166.502	5.11501	367117	12.8134	395480	12.8879	25340000	17.0479	95776716	18.3775	1	1	2.43923e+06	14.7072	0	0	0	1	0	179	0	0	0	0	0	0	0	0	0	0	0	0	0	0	0	0	0	0	0	1	0	0	0
2019-12-01	Brunei	1	20842	9.94477	100.485	4.61001	99.4343	4.5995	1672621	14.3299	7844.14	8.96765	25340000	17.0479	438048	12.9901	1	1	2.6268e+06	14.7813	0	0	0	1	0	144	0	0	0	0	0	0	0	0	0	0	0	0	0	0	0	0	0	0	0	0	1	1	0
2019-12-02	Canada	2	51766	10.8545	100.485	4.61001	117.115	4.76316	44270737	17.6058	8969060	16.0093	25340000	17.0479	37601230	17.4425	1	1	2.24219e+06	14.623	0	0	0	1	0	176	0	0	0	0	0	0	0	0	0	0	0	0	0	0	0	0	0	0	0	0	1	0	1
2019-12-03	Chile	3	52517	10.8689	100.485	4.61001	133.726	4.89579	2213447	14.6101	630322	13.354	25340000	17.0479	19039485	16.762	1	1	2.72558e+06	14.8182	0	0	0	1	0	163	0	0	0	0	0	0	0	0	0	0	0	0	0	0	0	0	0	0	0	0	1	0	0
2019-12-04	China	4	456989	13.0324	100.485	4.61001	127.793	4.85041	23792768	16.9849	11902820	16.2923	25340000	17.0479	1407745000	21.0653	1	1	2.36518e+06	14.6764	0	0	0	1	0	18	0	0	0	0	0	0	0	0	0	0	0	0	0	0	0	0	0	0	0	0	1	0	0
2019-12-06	Fiji	5	110981	11.6171	100.485	4.61001	130.375	4.87041	3839507	15.1609	22123.6	10.0044	25340000	17.0479	918465	13.7305	1	0	3.25977e+06	14.9972	0	1	1	1	0	140	0	0	0	0	0	0	0	0	0	0	0	0	0	0	0	0	0	0	0	0	1	0	0
2019-12-07	Hong Kong (SAR)	6	310630	12.6464	100.485	4.61001	136.112	4.91348	16534595	16.621	6259222	15.6496	25340000	17.0479	7507900	15.8315	1	1	2.4499e+06	14.7116	0	0	0	1	0	144	0	0	0	0	0	0	0	0	0	0	0	0	0	0	0	0	0	0	0	0	1	0	0
2019-12-08	India	7	17920	9.79373	100.485	4.61001	179.332	5.18924	1174775	13.9766	53045516	17.7867	25340000	17.0479	1383112050	21.0476	1	1	2.08445e+06	14.55	0	0	0	1	0	141	0	0	0	0	0	0	0	0	0	0	0	0	0	0	0	0	0	0	0	0	1	0	0
2019-12-09	Indonesia	8	331283	12.7107	100.485	4.61001	152.789	5.02906	19867301	16.8046	649393	13.3838	25340000	17.0479	269582878	19.4124	1	1	2.66431e+06	14.7955	0	0	0	1	0	142	0	0	0	0	0	0	0	0	0	0	0	0	0	0	0	0	0	0	0	0	1	0	0
2019-12-10	Japan	9	183384	12.1193	100.485	4.61001	105.994	4.66338	23934242	16.9908	3293723	15.0075	25340000	17.0479	126633000	18.6568	1	0	2.52658e+06	14.7424	0	1	1	1	0	3	0	0	0	0	0	0	0	0	0	0	0	0	0	0	0	0	0	0	0	0	1	0	0
2019-12-11	Korea	10	84997	11.3504	100.485	4.61001	115.452	4.74886	9636375	16.0811	2724541	14.8178	25340000	17.0479	25755441	17.0642	0	1	2.44391e+06	14.7091	0	0	0	1	0	141	0	0	0	0	0	0	0	0	0	0	0	0	0	0	0	0	0	0	0	0	1	0	0
2019-12-12	Malaysia	11	368918	12.8183	100.485	4.61001	122.28	4.80631	9699054	16.0875	12510347	16.3421	25340000	17.0479	32804020	17.3061	1	1	2.52051e+06	14.74	0	0	0	1	0	144	0	0	0	0	0	0	0	0	0	0	0	0	0	0	0	0	0	0	0	0	1	0	0
2019-12-13	Mauritius	12	6070	8.71128	100.485	4.61001	129.475	4.86349	259668	12.4672	17470.7	9.76834	25340000	17.0479	1265711	14.0511	1	0	2.24274e+06	14.6232	0	1	1	1	0	176	0	0	0	0	0	0	0	0	0	0	0	0	0	0	0	0	0	0	0	0	1	0	0
2019-12-16	New Zealand	13	896610	13.7064	100.485	4.61001	1	0	119798357	18.6013	14244646	16.4719	25340000	17.0479	4979200	15.4208	1	0	3.33103e+06	15.0188	0	1	1	1	0	179	0	0	0	0	0	0	0	0	0	0	0	0	0	0	0	0	0	0	0	0	1	0	0
2019-12-18	Philippines	14	92124	11.4309	100.485	4.61001	131.426	4.87845	7374576	15.8135	1182038	13.9828	25340000	17.0479	110380804	18.5194	1	0	2.62019e+06	14.7788	0	1	1	1	0	140	0	0	0	0	0	0	0	0	0	0	0	0	0	0	0	0	0	0	0	0	1	0	0
2019-12-19	Qatar	15	149923	11.9179	100.485	4.61001	115.627	4.75037	0	0	55792.5	10.9294	25340000	17.0479	2807235	14.8477	1	1	1.80914e+06	14.4084	0	0	0	1	0	154	0	0	0	0	0	0	0	0	0	0	0	0	0	0	0	0	0	0	0	0	1	0	0
2019-12-20	Singapore	16	652254	13.3882	100.485	4.61001	114.915	4.74419	18706853	16.7444	3447425	15.0531	25340000	17.0479	5703569	15.5566	1	1	2.54598e+06	14.75	0	0	0	1	0	144	0	0	0	0	0	0	0	0	0	0	0	0	0	0	0	0	0	0	0	0	1	0	0
2019-12-21	Solomon Islands	17	8992	9.1042	100.485	4.61001	135.371	4.90802	768260	13.5519	135.051	4.91303	25340000	17.0479	674993	13.4225	1	0	3.10584e+06	14.9488	0	1	1	1	0	140	0	0	0	0	0	0	0	0	0	0	0	0	0	0	0	0	0	0	0	0	1	0	0
2019-12-22	South Africa	18	36848	10.5146	100.485	4.61001	161.149	5.08233	21307116	16.8746	16824183	16.6383	25340000	17.0479	58087055	17.8775	1	1	2.18742e+06	14.5982	0	0	0	1	0	140	0	0	0	0	0	0	0	0	0	0	0	0	0	0	0	0	0	0	0	0	1	0	0
2019-12-23	Sri Lanka	19	18166	9.80736	100.485	4.61001	162.02	5.08772	850637	13.6537	103412	11.5465	25340000	17.0479	21803000	16.8976	1	0	2.21538e+06	14.6109	0	1	1	1	0	141	0	0	0	0	0	0	0	0	0	0	0	0	0	0	0	0	0	0	0	0	1	0	0
2019-12-24	Taiwan	20	84404	11.3434	100.485	4.61001	161.931	5.08717	0	0	0	0	25340000	17.0479	23777737	16.9843	1	0	2.49793e+06	14.731	0	1	1	1	0	18	0	0	0	0	0	0	0	0	0	0	0	0	0	0	0	0	0	0	0	0	1	0	0
2019-12-25	Thailand	21	148257	11.9067	100.485	4.61001	113.235	4.72947	20232627	16.8228	5764733	15.5673	25340000	17.0479	71307763	18.0825	0	1	2.38719e+06	14.6856	0	0	0	1	0	140	0	0	0	0	0	0	0	0	0	0	0	0	0	0	0	0	0	0	0	0	1	0	0
2019-12-26	Tonga	22	2816	7.94343	100.485	4.61001	129.453	4.86332	0	0	1024.49	6.93293	25340000	17.0479	104951	11.5612	1	0	3.29898e+06	15.0091	0	1	1	1	0	140	0	0	0	0	0	0	0	0	0	0	0	0	0	0	0	0	0	0	0	0	1	0	0
2019-12-27	UK	23	123344	11.7227	100.485	4.61001	120.399	4.79082	241760019	19.3035	251000000	19.341	25340000	17.0479	9211657	16.036	1	1	1.83975e+06	14.4251	0	0	1	1	0	154	0	0	0	0	0	0	0	0	0	0	0	0	0	0	0	0	0	0	0	0	1	0	0
2019-12-28	United Arab Emirates	24	475073	13.0712	100.485	4.61001	113.726	4.73379	0	0	1598369	14.2845	25340000	17.0479	66836327	18.0178	1	1	1.69913e+06	14.3456	0	1	0	1	0	140	0	0	0	0	0	0	0	0	0	0	0	0	0	0	0	0	0	0	0	0	1	0	0
2019-12-29	USA	25	363919	12.8047	100.485	4.61001	117.848	4.7694	166866347	18.9327	116000000	18.5691	25340000	17.0479	328329953	19.6095	1	1	2.35545e+06	14.6722	0	0	0	1	0	156	0	0	0	0	0	0	0	0	0	0	0	0	0	0	0	0	0	0	0	0	1	0	0
2019-12-31	Vietnam	26	60777	11.015	100.485	4.61001	168.832	5.1289	367117	12.8134	395480	12.8879	25340000	17.0479	95776716	18.3775	1	1	2.43923e+06	14.7072	0	0	0	1	0	179	0	0	0	0	0	0	0	0	0	0	0	0	0	0	0	0	0	0	0	0	1	0	0
2020-01-01	Brunei	1	21616	9.98124	100.463	4.60979	100.04	4.60557	38896	10.5687	3214	8.07558	25660000	17.0604	441725	12.9984	1	1	2.6268e+06	14.7813	0	0	0	1	0	144	9	0	0	0	0	0	1.25548	0	1	1	0	0	0	0	0	0	0	0	0	0	0	1	0
2020-01-02	Canada	2	54519	10.9063	100.463	4.60979	117.459	4.76609	1029485	13.8446	1456033	14.1912	25660000	17.0604	38037204	17.4541	1	1	2.24219e+06	14.623	0	0	0	1	0	176	9	4	0	0	0	0	1.25548	0.807097	1	1	0	0	0	0	0	0	0	0	0	0	0	0	1
2020-01-03	Chile	3	52660	10.8716	100.463	4.60979	134.474	4.90137	51472	10.8488	431707	12.9755	25660000	17.0604	19300315	16.7756	1	1	2.72558e+06	14.8182	0	0	0	1	0	163	9	0	0	0	0	0	1.25548	0	1	1	0	0	0	0	0	0	0	0	0	0	0	0	0
2020-01-04	China	4	504278	13.1309	100.463	4.60979	129.632	4.8647	553284	13.2236	120788559	18.6096	25660000	17.0604	1411100000	21.0676	1	1	2.36518e+06	14.6764	0	0	0	1	0	18	9	9236	0	196	0	0	1.25548	18.8181	1	1	0	0	0	0	0	0	0	0	0	0	0	0	0
2020-01-06	Fiji	5	108614	11.5956	100.463	4.60979	130.604	4.87217	89285	11.3996	368553	12.8173	25660000	17.0604	920422	13.7326	1	0	3.25977e+06	14.9972	0	1	1	1	0	140	9	0	0	0	0	0	1.25548	0.716774	1	1	0	0	0	0	0	0	0	0	0	0	0	0	0
2020-01-07	Hong Kong (SAR)	6	318146	12.6703	100.463	4.60979	133.138	4.89139	384500	12.8597	2143924	14.5781	25660000	17.0604	7481000	15.8279	1	1	2.4499e+06	14.7116	0	0	0	1	0	144	9	12	0	0	0	0	1.25548	10.4239	1	1	0	0	0	0	0	0	0	0	0	0	0	0	0
2020-01-08	India	7	17920	9.79373	100.463	4.60979	179.094	5.18791	27319	10.2154	183888416	19.0298	25660000	17.0604	1396387127	21.0572	1	1	2.08445e+06	14.55	0	0	0	1	0	141	9	1	0	0	0	0	1.25548	0.657419	1	1	0	0	0	0	0	0	0	0	0	0	0	0	0
2020-01-09	Indonesia	8	345631	12.7531	100.463	4.60979	153.228	5.03193	462000	13.0433	8461633	15.9511	25660000	17.0604	271857970	19.4208	1	1	2.66431e+06	14.7955	0	0	0	1	0	142	9	0	0	0	0	0	1.25548	0	1	1	0	0	0	0	0	0	0	0	0	0	0	0	0
2020-01-10	Japan	9	190222	12.156	100.463	4.60979	105.994	4.66338	556574	13.2296	1066091	13.8795	25660000	17.0604	126261000	18.6539	1	0	2.52658e+06	14.7424	0	1	1	1	0	3	9	13	0	0	0	0	1.25548	0.896774	1	1	0	0	0	0	0	0	0	0	0	0	0	0	0
2020-01-11	Korea	10	89687	11.4041	100.463	4.60979	115.882	4.75257	224087	12.3198	5161665	15.4568	25660000	17.0604	25867467	17.0685	0	1	2.44391e+06	14.7091	0	0	0	1	0	141	9	10	0	0	0	0	1.25548	3.40452	1	1	0	0	0	0	0	0	0	0	0	0	0	0	0
2020-01-12	Malaysia	11	365264	12.8084	100.463	4.60979	122.38	4.80713	225545	12.3263	6783420	15.73	25660000	17.0604	33199993	17.3181	1	1	2.52051e+06	14.74	0	0	0	1	0	144	9	8	0	0	0	0	1.25548	3.40452	1	1	0	0	0	0	0	0	0	0	0	0	0	0	0
2020-01-13	Mauritius	12	6612	8.79679	100.463	4.60979	132.734	4.88835	6038	8.70599	110807	11.6156	25660000	17.0604	1265740	14.0512	1	0	2.24274e+06	14.6232	0	1	1	1	0	176	9	0	0	0	0	0	1.25548	0	1	1	0	0	0	0	0	0	0	0	0	0	0	0	0
2020-01-16	New Zealand	13	918390	13.7304	100.463	4.60979	1	0	2785827	14.8401	10744858	16.1899	25660000	17.0604	5090200	15.4428	1	0	3.33103e+06	15.0188	0	1	1	1	0	179	9	0	0	0	0	0	1.25548	0	1	1	0	0	0	0	0	0	0	0	0	0	0	0	0
2020-01-18	Philippines	14	93222	11.4427	100.463	4.60979	132.313	4.88517	171491	12.0523	32964362	17.3109	25660000	17.0604	112190977	18.5357	1	0	2.62019e+06	14.7788	0	1	1	1	0	140	9	1	0	0	0	0	1.25548	0.985484	1	1	0	0	0	0	0	0	0	0	0	0	0	0	0
2020-01-19	Qatar	15	154256	11.9464	100.463	4.60979	114.579	4.74127	0	0	643	6.4677	25660000	17.0604	2760385	14.8309	1	1	1.80914e+06	14.4084	0	0	0	1	0	154	9	0	0	0	0	0	1.25548	0	1	1	0	0	0	0	0	0	0	0	0	0	0	0	0
2020-01-20	Singapore	16	660515	13.4008	100.463	4.60979	114.639	4.74179	435015	12.9831	557281	13.2308	25660000	17.0604	5685807	15.5535	1	1	2.54598e+06	14.75	0	0	0	1	0	144	9	13	0	0	0	0	1.25548	5.64387	1	1	0	0	0	0	0	0	0	0	0	0	0	0	0
2020-01-21	Solomon Islands	17	9696	9.17957	100.463	4.60979	142.336	4.95819	17865	9.79065	228	5.43372	25660000	17.0604	691191	13.4462	1	0	3.10584e+06	14.9488	0	1	1	1	0	140	9	0	0	0	0	0	1.25548	0	1	1	0	0	0	0	0	0	0	0	0	0	0	0	0
2020-01-22	South Africa	18	37216	10.5245	100.463	4.60979	161.501	5.08451	495482	13.1133	3643828	15.1085	25660000	17.0604	58801927	17.8897	1	1	2.18742e+06	14.5982	0	0	0	1	0	140	9	0	0	0	0	0	1.25548	0.0896774	1	1	0	0	0	0	0	0	0	0	0	0	0	0	0
2020-01-23	Sri Lanka	19	18166	9.80736	100.463	4.60979	164.42	5.10242	19781	9.89253	5064954	15.4379	25660000	17.0604	21919000	16.9029	1	0	2.21538e+06	14.6109	0	1	1	1	0	141	9	1	0	0	0	0	1.25548	1.16452	1	1	0	0	0	0	0	0	0	0	0	0	0	0	0
2020-01-24	Taiwan	20	84404	11.3434	100.463	4.60979	156.075	5.05034	0	0	0	0	25660000	17.0604	23726185	16.9821	1	0	2.49793e+06	14.731	0	1	1	1	0	18	9	9	0	0	0	0	1.25548	6.09194	1	1	0	0	0	0	0	0	0	0	0	0	0	0	0
2020-01-25	Thailand	21	149110	11.9124	100.463	4.60979	113.412	4.73103	470496	13.0615	1723805	14.36	25660000	17.0604	71475664	18.0849	0	1	2.38719e+06	14.6856	0	0	0	1	0	140	9	15	0	0	0	0	1.25548	0	1	1	0	0	0	0	0	0	0	0	0	0	0	0	0
2020-01-26	Tonga	22	3520	8.1665	100.463	4.60979	129.067	4.86033	0	0	20356	9.92118	25660000	17.0604	105254	11.5641	1	0	3.29898e+06	15.0091	0	1	1	1	0	140	9	0	0	0	0	0	1.25548	0	1	1	0	0	0	0	0	0	0	0	0	0	0	0	0
2020-01-27	UK	23	123441	11.7235	100.463	4.60979	120.178	4.78897	5621960	15.5422	124148286	18.637	25660000	17.0604	9287289	16.0442	1	1	1.83975e+06	14.4251	0	0	1	1	0	154	9	2	0	1	0	0	1.25548	0.448065	1	1	0	0	0	0	0	0	0	0	0	0	0	0	0
2020-01-28	United Arab Emirates	24	468492	13.0573	100.463	4.60979	113.627	4.73292	0	0	37825	10.5408	25660000	17.0604	67081000	18.0214	1	1	1.69913e+06	14.3456	0	1	0	1	0	140	9	4	0	0	0	0	1.25548	0	1	1	0	0	0	0	0	0	0	0	0	0	0	0	0
2020-01-29	USA	25	382587	12.8547	100.463	4.60979	118.305	4.77327	3880360	15.1714	6860043	15.7412	25660000	17.0604	331501080	19.6191	1	1	2.35545e+06	14.6722	0	0	0	1	0	156	9	7	0	0	0	0	1.25548	0	1	1	0	0	0	0	0	0	0	0	0	0	0	0	0
2020-01-31	Vietnam	26	60442	11.0095	100.463	4.60979	170.913	5.14115	8537	9.05228	17626894	16.6849	25660000	17.0604	96648685	18.3866	1	1	2.43923e+06	14.7072	0	0	0	1	0	179	9	2	0	0	0	0	1.25548	2.77839	1	1	0	0	0	0	0	0	0	0	0	0	0	0	0
2020-02-01	Brunei	1	19604	9.88354	100.41	4.60926	100.571	4.61087	38896	10.5687	3214	8.07558	25660000	17.0604	441725	12.9984	1	1	2.6268e+06	14.7813	0	0	0	1	0	144	25	0	0	0	0	0	19.0572	0	1	0	1	0	0	0	0	0	0	0	0	0	0	1	0
2020-02-02	Canada	2	42156	10.6492	100.41	4.60926	117.974	4.77046	1029485	13.8446	1456033	14.1912	25660000	17.0604	38037204	17.4541	1	1	2.24219e+06	14.623	0	0	0	1	0	176	25	29	0	0	0	0	19.0572	2.78	1	0	1	0	0	0	0	0	0	0	0	0	0	0	1
2020-02-03	Chile	3	47184	10.7618	100.41	4.60926	135.081	4.90587	51472	10.8488	431707	12.9755	25660000	17.0604	19300315	16.7756	1	1	2.72558e+06	14.8182	0	0	0	1	0	163	25	2	0	0	0	0	19.0572	0	1	0	1	0	0	0	0	0	0	0	0	0	0	0	0
2020-02-04	China	4	103280	11.5452	100.41	4.60926	130.667	4.87265	553284	13.2236	120788559	18.6096	25660000	17.0604	1411100000	21.0676	1	1	2.36518e+06	14.6764	0	0	0	1	0	18	25	69468	0	2622	0	0	19.0572	76.9928	1	0	1	0	0	0	0	0	0	0	0	0	0	0	0
2020-02-06	Fiji	5	71296	11.1746	100.41	4.60926	130.031	4.86777	89285	11.3996	368553	12.8173	25660000	17.0604	920422	13.7326	1	0	3.25977e+06	14.9972	0	1	1	1	0	140	25	0	0	0	0	0	19.0572	18.8655	1	0	1	0	0	0	0	0	0	0	0	0	0	0	0
2020-02-07	Hong Kong (SAR)	6	229878	12.3453	100.41	4.60926	136.517	4.91645	384500	12.8597	2143924	14.5781	25660000	17.0604	7481000	15.8279	1	1	2.4499e+06	14.7116	0	0	0	1	0	144	25	83	0	2	0	0	19.0572	52.2683	1	0	1	0	0	0	0	0	0	0	0	0	0	0	0
2020-02-08	India	7	17408	9.76474	100.41	4.60926	177.782	5.18056	27319	10.2154	183888416	19.0298	25660000	17.0604	1396387127	21.0572	1	1	2.08445e+06	14.55	0	0	0	1	0	141	25	2	0	0	0	0	19.0572	10.19	1	0	1	0	0	0	0	0	0	0	0	0	0	0	0
2020-02-09	Indonesia	8	299284	12.6092	100.41	4.60926	153.657	5.03472	462000	13.0433	8461633	15.9511	25660000	17.0604	271857970	19.4208	1	1	2.66431e+06	14.7955	0	0	0	1	0	142	25	0	0	0	0	0	19.0572	0	1	0	1	0	0	0	0	0	0	0	0	0	0	0	0
2020-02-10	Japan	9	175894	12.0776	100.41	4.60926	105.783	4.66139	556574	13.2296	1066091	13.8795	25660000	17.0604	126261000	18.6539	1	0	2.52658e+06	14.7424	0	1	1	1	0	3	25	230	0	6	0	0	19.0572	21.8045	1	0	1	0	0	0	0	0	0	0	0	0	0	0	0
2020-02-11	Korea	10	82658	11.3225	100.41	4.60926	115.963	4.75327	224087	12.3198	5161665	15.4568	25660000	17.0604	25867467	17.0685	0	1	2.44391e+06	14.7091	0	0	0	1	0	141	25	3139	0	16	0	0	19.0572	19.44	1	0	1	0	0	0	0	0	0	0	0	0	0	0	0
2020-02-12	Malaysia	11	297494	12.6032	100.41	4.60926	122.38	4.80713	225545	12.3263	6783420	15.73	25660000	17.0604	33199993	17.3181	1	1	2.52051e+06	14.74	0	0	0	1	0	144	25	21	0	0	0	0	19.0572	19.44	1	0	1	0	0	0	0	0	0	0	0	0	0	0	0
2020-02-13	Mauritius	12	4368	8.38229	100.41	4.60926	133.612	4.89494	6038	8.70599	110807	11.6156	25660000	17.0604	1265740	14.0512	1	0	2.24274e+06	14.6232	0	1	1	1	0	176	25	0	0	0	0	0	19.0572	0	1	0	1	0	0	0	0	0	0	0	0	0	0	0	0
2020-02-16	New Zealand	13	774491	13.56	100.41	4.60926	1	0	2785827	14.8401	10744858	16.1899	25660000	17.0604	5090200	15.4428	1	0	3.33103e+06	15.0188	0	1	1	1	0	179	25	1	0	0	0	0	19.0572	1.34069	1	0	1	0	0	0	0	0	0	0	0	0	0	0	0
2020-02-18	Philippines	14	80380	11.2945	100.41	4.60926	131.806	4.88133	171491	12.0523	32964362	17.3109	25660000	17.0604	112190977	18.5357	1	0	2.62019e+06	14.7788	0	1	1	1	0	140	25	2	0	1	0	0	19.0572	23.8497	1	0	1	0	0	0	0	0	0	0	0	0	0	0	0
2020-02-19	Qatar	15	143787	11.8761	100.41	4.60926	114.568	4.74116	0	0	643	6.4677	25660000	17.0604	2760385	14.8309	1	1	1.80914e+06	14.4084	0	0	0	1	0	154	25	1	0	0	0	0	19.0572	0.478966	1	0	1	0	0	0	0	0	0	0	0	0	0	0	0
2020-02-20	Singapore	16	568269	13.2504	100.41	4.60926	114.725	4.74254	435015	12.9831	557281	13.2308	25660000	17.0604	5685807	15.5535	1	1	2.54598e+06	14.75	0	0	0	1	0	144	25	89	0	0	0	0	19.0572	23.8497	1	0	1	0	0	0	0	0	0	0	0	0	0	0	0
2020-02-21	Solomon Islands	17	9208	9.12794	100.41	4.60926	142.716	4.96085	17865	9.79065	228	5.43372	25660000	17.0604	691191	13.4462	1	0	3.10584e+06	14.9488	0	1	1	1	0	140	25	0	0	0	0	0	19.0572	0	1	0	1	0	0	0	0	0	0	0	0	0	0	0	0
2020-02-22	South Africa	18	31434	10.3557	100.41	4.60926	163.085	5.09427	495482	13.1133	3643828	15.1085	25660000	17.0604	58801927	17.8897	1	1	2.18742e+06	14.5982	0	0	0	1	0	140	25	0	0	0	0	0	19.0572	36.5583	1	0	1	0	0	0	0	0	0	0	0	0	0	0	0
2020-02-23	Sri Lanka	19	16994	9.74067	100.41	4.60926	164.42	5.10242	19781	9.89253	5064954	15.4379	25660000	17.0604	21919000	16.9029	1	0	2.21538e+06	14.6109	0	1	1	1	0	141	25	0	0	0	0	0	19.0572	8.90517	1	0	1	0	0	0	0	0	0	0	0	0	0	0	0
2020-02-24	Taiwan	20	64316	11.0716	100.41	4.60926	156.075	5.05034	0	0	0	0	25660000	17.0604	23726185	16.9821	1	0	2.49793e+06	14.731	0	1	1	1	0	18	25	29	0	1	0	0	19.0572	28.899	1	0	1	0	0	0	0	0	0	0	0	0	0	0	0
2020-02-25	Thailand	21	140458	11.8527	100.41	4.60926	113.324	4.73025	470496	13.0615	1723805	14.36	25660000	17.0604	71475664	18.0849	0	1	2.38719e+06	14.6856	0	0	0	1	0	140	25	23	0	0	0	0	19.0572	0	1	0	1	0	0	0	0	0	0	0	0	0	0	0	0
2020-02-26	Tonga	22	2816	7.94343	100.41	4.60926	129.453	4.86332	0	0	20356	9.92118	25660000	17.0604	105254	11.5641	1	0	3.29898e+06	15.0091	0	1	1	1	0	140	25	0	0	0	0	0	19.0572	0	1	0	1	0	0	0	0	0	0	0	0	0	0	0	0
2020-02-27	UK	23	112283	11.6288	100.41	4.60926	120.51	4.79174	5621960	15.5422	124148286	18.637	25660000	17.0604	9287289	16.0442	1	1	1.83975e+06	14.4251	0	0	1	1	0	154	25	59	0	2	0	0	19.0572	11.0141	1	0	1	0	0	0	0	0	0	0	0	0	0	0	0
2020-02-28	United Arab Emirates	24	403965	12.9091	100.41	4.60926	112.319	4.72135	0	0	37825	10.5408	25660000	17.0604	67081000	18.0214	1	1	1.69913e+06	14.3456	0	1	0	1	0	140	25	17	0	0	0	0	19.0572	7.1831	1	0	1	0	0	0	0	0	0	0	0	0	0	0	0
2020-02-29	USA	25	336260	12.7256	100.41	4.60926	118.629	4.776	3880360	15.1714	6860043	15.7412	25660000	17.0604	331501080	19.6191	1	1	2.35545e+06	14.6722	0	0	0	1	0	156	25	17	0	1	0	0	19.0572	7.1831	1	0	1	0	0	0	0	0	0	0	0	0	0	0	0
2020-02-28	Vietnam	26	57456	10.9588	100.41	4.60926	170.628	5.13948	8537	9.05228	17626894	16.6849	25660000	17.0604	96648685	18.3866	1	1	2.43923e+06	14.7072	0	0	0	1	0	179	25	14	0	0	0	0	19.0572	40.8669	1	0	1	0	0	0	0	0	0	0	0	0	0	0	0
2020-03-01	Brunei	1	16496	9.71093	97.7101	4.582	1	0	38896	10.5687	3214	8.07558	25660000	17.0604	441725	12.9984	1	1	2.6268e+06	14.7813	0	0	0	1	0	144	4559	129	18	1	0	0	38.6487	34.5884	1	0	0	1	0	0	0	0	0	0	0	0	0	1	0
2020-03-02	Canada	2	39945	10.5953	97.7101	4.582	1	0	1029485	13.8446	1456033	14.1912	25660000	17.0604	38037204	17.4541	1	1	2.24219e+06	14.623	0	0	0	1	0	176	4559	10678	18	152	0	0	38.6487	39.9206	1	0	0	1	0	0	0	0	0	0	0	0	0	0	1
2020-03-03	Chile	3	42547	10.6584	97.7101	4.582	1	0	51472	10.8488	431707	12.9755	25660000	17.0604	19300315	16.7756	1	1	2.72558e+06	14.8182	0	0	0	1	0	163	4559	2842	18	12	0	0	38.6487	33.961	1	0	0	1	0	0	0	0	0	0	0	0	0	0	0
2020-03-04	China	4	72568	11.1923	97.7101	4.582	1	0	553284	13.2236	120788559	18.6096	25660000	17.0604	1411100000	21.0676	1	1	2.36518e+06	14.6764	0	0	0	1	0	18	4559	3814	18	470	0	0	38.6487	79.5265	1	0	0	1	0	0	0	0	0	0	0	0	0	0	0
2020-03-06	Fiji	5	57171	10.9538	97.7101	4.582	1	0	89285	11.3996	368553	12.8173	25660000	17.0604	920422	13.7326	1	0	3.25977e+06	14.9972	0	1	1	1	0	140	4559	5	18	0	0	0	38.6487	46.6826	1	0	0	1	0	0	0	0	0	0	0	0	0	0	0
2020-03-07	Hong Kong (SAR)	6	99094	11.5038	97.7101	4.582	1	0	384500	12.8597	2143924	14.5781	25660000	17.0604	7481000	15.8279	1	1	2.4499e+06	14.7116	0	0	0	1	0	144	4559	585	18	2	0	0	38.6487	51.3419	1	0	0	1	0	0	0	0	0	0	0	0	0	0	0
2020-03-08	India	7	12800	9.45728	97.7101	4.582	1	0	27319	10.2154	183888416	19.0298	25660000	17.0604	1396387127	21.0572	1	1	2.08445e+06	14.55	0	0	0	1	0	141	4559	1394	18	36	0	0	38.6487	52.3587	1	0	0	1	0	0	0	0	0	0	0	0	0	0	0
2020-03-09	Indonesia	8	233341	12.3603	97.7101	4.582	1	0	462000	13.0433	8461633	15.9511	25660000	17.0604	271857970	19.4208	1	1	2.66431e+06	14.7955	0	0	0	1	0	142	4559	1528	18	136	0	0	38.6487	40.8916	1	0	0	1	0	0	0	0	0	0	0	0	0	0	0
2020-03-10	Japan	9	143510	11.8742	97.7101	4.582	1	0	556574	13.2296	1066091	13.8795	25660000	17.0604	126261000	18.6539	1	0	2.52658e+06	14.7424	0	1	1	1	0	3	4559	2010	18	61	0	0	38.6487	41.1587	1	0	0	1	0	0	0	0	0	0	0	0	0	0	0
2020-03-11	Korea	10	18115	9.80455	97.7101	4.582	1	0	224087	12.3198	5161665	15.4568	25660000	17.0604	25867467	17.0685	0	1	2.44391e+06	14.7091	0	0	0	1	0	141	4559	6636	18	146	0	0	38.6487	48.0874	1	0	0	1	0	0	0	0	0	0	0	0	0	0	0
2020-03-12	Malaysia	11	185534	12.131	97.7101	4.582	1	0	225545	12.3263	6783420	15.73	25660000	17.0604	33199993	17.3181	1	1	2.52051e+06	14.74	0	0	0	1	0	144	4559	2737	18	48	0	0	38.6487	48.0874	1	0	0	1	0	0	0	0	0	0	0	0	0	0	0
2020-03-13	Mauritius	12	3822	8.24879	97.7101	4.582	1	0	6038	8.70599	110807	11.6156	25660000	17.0604	1265740	14.0512	1	0	2.24274e+06	14.6232	0	1	1	1	0	176	4559	125	18	3	0	0	38.6487	28.5852	1	0	0	1	0	0	0	0	0	0	0	0	0	0	0
2020-03-16	New Zealand	13	600517	13.3055	97.7101	4.582	1	0	2785827	14.8401	10744858	16.1899	25660000	17.0604	5090200	15.4428	1	0	3.33103e+06	15.0188	0	1	1	1	0	179	4559	646	18	1	0	0	38.6487	46.0258	1	0	0	1	0	0	0	0	0	0	0	0	0	0	0
2020-03-18	Philippines	14	47542	10.7694	97.7101	4.582	1	0	171491	12.0523	32964362	17.3109	25660000	17.0604	112190977	18.5357	1	0	2.62019e+06	14.7788	0	1	1	1	0	140	4559	2081	18	89	0	0	38.6487	64.8445	1	0	0	1	0	0	0	0	0	0	0	0	0	0	0
2020-03-19	Qatar	15	145742	11.8896	97.7101	4.582	1	0	0	0	643	6.4677	25660000	17.0604	2760385	14.8309	1	1	1.80914e+06	14.4084	0	0	0	1	0	154	4559	780	18	2	0	0	38.6487	48.2097	1	0	0	1	0	0	0	0	0	0	0	0	0	0	0
2020-03-20	Singapore	16	377030	12.8401	97.7101	4.582	1	0	435015	12.9831	557281	13.2308	25660000	17.0604	5685807	15.5535	1	1	2.54598e+06	14.75	0	0	0	1	0	144	4559	824	18	3	0	0	38.6487	35.1532	1	0	0	1	0	0	0	0	0	0	0	0	0	0	0
2020-03-21	Solomon Islands	17	7416	8.91153	97.7101	4.582	1	0	17865	9.79065	228	5.43372	25660000	17.0604	691191	13.4462	1	0	3.10584e+06	14.9488	0	1	1	1	0	140	4559		18	0	0	0	38.6487	0	1	0	0	1	0	0	0	0	0	0	0	0	0	0	0
2020-03-22	South Africa	18	25855	10.1603	97.7101	4.582	1	0	495482	13.1133	3643828	15.1085	25660000	17.0604	58801927	17.8897	1	1	2.18742e+06	14.5982	0	0	0	1	0	140	4559	1353	18	5	0	0	38.6487	62.5787	1	0	0	1	0	0	0	0	0	0	0	0	0	0	0
2020-03-23	Sri Lanka	19	14650	9.59226	97.7101	4.582	1	0	19781	9.89253	5064954	15.4379	25660000	17.0604	21919000	16.9029	1	0	2.21538e+06	14.6109	0	1	1	1	0	141	4559	142	18	2	0	0	38.6487	54.5694	1	0	0	1	0	0	0	0	0	0	0	0	0	0	0
2020-03-24	Taiwan	20	42804	10.6644	97.7101	4.582	1	0	0	0	0	0	25660000	17.0604	23726185	16.9821	1	0	2.49793e+06	14.731	0	1	1	1	0	18	4559	283	18	4	0	0	38.6487	29.1497	1	0	0	1	0	0	0	0	0	0	0	0	0	0	0
2020-03-25	Thailand	21	113635	11.6408	97.7101	4.582	1	0	470496	13.0615	1723805	14.36	25660000	17.0604	71475664	18.0849	0	1	2.38719e+06	14.6856	0	0	0	1	0	140	4559	1609	18	10	0	0	38.6487	35.9026	1	0	0	1	0	0	0	0	0	0	0	0	0	0	0
2020-03-26	Tonga	22	2112	7.65586	97.7101	4.582	1	0	0	0	20356	9.92118	25660000	17.0604	105254	11.5641	1	0	3.29898e+06	15.0091	0	1	1	1	0	140	4559	0	18	0	0	0	38.6487	0	1	0	0	1	0	0	0	0	0	0	0	0	0	0	0
2020-03-27	UK	23	107473	11.585	97.7101	4.582	1	0	5621960	15.5422	124148286	18.637	25660000	17.0604	9287289	16.0442	1	1	1.83975e+06	14.4251	0	0	1	1	0	154	4559	38423	18	5138	0	0	38.6487	36.6332	1	0	0	1	0	0	0	0	0	0	0	0	0	0	0
2020-03-28	United Arab Emirates	24	312307	12.6517	97.7101	4.582	1	0	0	0	37825	10.5408	25660000	17.0604	67081000	18.0214	1	1	1.69913e+06	14.3456	0	1	0	1	0	140	4559	643	18	6	0	0	38.6487	45.8642	1	0	0	1	0	0	0	0	0	0	0	0	0	0	0
2020-03-29	USA	25	252750	12.4402	97.7101	4.582	1	0	3880360	15.1714	6860043	15.7412	25660000	17.0604	331501080	19.6191	1	1	2.35545e+06	14.6722	0	0	0	1	0	156	4559	192054	18	5358	0	0	38.6487	45.8642	1	0	0	1	0	0	0	0	0	0	0	0	0	0	0
2020-03-31	Vietnam	26	41222	10.6268	97.7101	4.582	1	0	8537	9.05228	17626894	16.6849	25660000	17.0604	96648685	18.3866	1	1	2.43923e+06	14.7072	0	0	0	1	0	179	4559	196	18	0	0	0	38.6487	53.4929	1	0	0	1	0	0	0	0	0	0	0	0	0	0	0
2020-04-01	Brunei	1	3302	8.10259	93.435	4.53727	101.116	4.61627	38896	10.5687	3214	8.07558	25660000	17.0604	441725	12.9984	1	1	2.6268e+06	14.7813	0	0	0	1	0	144	6766	9	93	0	0	0	71.1097	56.48	1	0	0	0	1	0	0	0	0	0	0	0	0	1	0
2020-04-02	Canada	2	2982	8.00068	93.435	4.53727	116.514	4.75801	1029485	13.8446	1456033	14.1912	25660000	17.0604	38037204	17.4541	1	1	2.24219e+06	14.623	0	0	0	1	0	176	6766	46503	93	3903	0	0	71.1097	74.725	1	0	0	0	1	0	0	0	0	0	0	0	0	0	1
2020-04-03	Chile	3	3336	8.11283	93.435	4.53727	135.468	4.90873	51472	10.8488	431707	12.9755	25660000	17.0604	19300315	16.7756	1	1	2.72558e+06	14.8182	0	0	0	1	0	163	6766	14858	93	215	0	0	71.1097	75.93	1	0	0	0	1	0	0	0	0	0	0	0	0	0	0
2020-04-04	China	4	8926	9.09684	93.435	4.53727	127.908	4.85131	553284	13.2236	120788559	18.6096	25660000	17.0604	1411100000	21.0676	1	1	2.36518e+06	14.6764	0	0	0	1	0	18	6766	2681	93	38	0	0	71.1097	60.213	1	0	0	0	1	0	0	0	0	0	0	0	0	0	0
2020-04-06	Fiji	5	1339	7.20042	93.435	4.53727	131.293	4.87743	89285	11.3996	368553	12.8173	25660000	17.0604	920422	13.7326	1	0	3.25977e+06	14.9972	0	1	1	1	0	140	6766	13	93	0	0	0	71.1097	85.185	1	0	0	0	1	0	0	0	0	0	0	0	0	0	0
2020-04-07	Hong Kong (SAR)	6	13268	9.49319	93.435	4.53727	136.517	4.91645	384500	12.8597	2143924	14.5781	25660000	17.0604	7481000	15.8279	1	1	2.4499e+06	14.7116	0	0	0	1	0	144	6766	357	93	0	0	0	71.1097	66.2067	1	0	0	0	1	0	0	0	0	0	0	0	0	0	0
2020-04-08	India	7	0	0	93.435	4.53727	180.525	5.19587	27319	10.2154	183888416	19.0298	25660000	17.0604	1396387127	21.0572	1	1	2.08445e+06	14.55	0	0	0	1	0	141	6766	33466	93	1119	0	0	71.1097	98.6433	1	0	0	0	1	0	0	0	0	0	0	0	0	0	0
2020-04-09	Indonesia	8	10498	9.25904	93.435	4.53727	153.92	5.03644	462000	13.0433	8461633	15.9511	25660000	17.0604	271857970	19.4208	1	1	2.66431e+06	14.7955	0	0	0	1	0	142	6766	8590	93	656	0	0	71.1097	68.4267	1	0	0	0	1	0	0	0	0	0	0	0	0	0	0
2020-04-10	Japan	9	9360	9.14431	93.435	4.53727	105.678	4.66039	556574	13.2296	1066091	13.8795	25660000	17.0604	126261000	18.6539	1	0	2.52658e+06	14.7424	0	1	1	1	0	3	6766	12029	93	414	0	0	71.1097	45.7397	1	0	0	0	1	0	0	0	0	0	0	0	0	0	0
2020-04-11	Korea	10	4323	8.37194	93.435	4.53727	115.198	4.74666	224087	12.3198	5161665	15.4568	25660000	17.0604	25867467	17.0685	0	1	2.44391e+06	14.7091	0	0	0	1	0	141	6766	988	93	86	0	0	71.1097	77.96	1	0	0	0	1	0	0	0	0	0	0	0	0	0	0
2020-04-12	Malaysia	11	5220	8.56044	93.435	4.53727	117.58	4.76712	225545	12.3263	6783420	15.73	25660000	17.0604	33199993	17.3181	1	1	2.52051e+06	14.74	0	0	0	1	0	144	6766	3236	93	55	0	0	71.1097	77.96	1	0	0	0	1	0	0	0	0	0	0	0	0	0	0
2020-04-13	Mauritius	12	0	0	93.435	4.53727	136.369	4.91536	6038	8.70599	110807	11.6156	25660000	17.0604	1265740	14.0512	1	0	2.24274e+06	14.6232	0	1	1	1	0	176	6766	207	93	7	0	0	71.1097	82.41	1	0	0	0	1	0	0	0	0	0	0	0	0	0	0
2020-04-16	New Zealand	13	20700	9.93794	93.435	4.53727	1	0	2785827	14.8401	10744858	16.1899	25660000	17.0604	5090200	15.4428	1	0	3.33103e+06	15.0188	0	1	1	1	0	179	6766	833	93	19	0	0	71.1097	98.3367	1	0	0	0	1	0	0	0	0	0	0	0	0	0	0
2020-04-18	Philippines	14	3844	8.25453	93.435	4.53727	131.426	4.87845	171491	12.0523	32964362	17.3109	25660000	17.0604	112190977	18.5357	1	0	2.62019e+06	14.7788	0	1	1	1	0	140	6766	6404	93	480	0	0	71.1097	100	1	0	0	0	1	0	0	0	0	0	0	0	0	0	0
2020-04-19	Qatar	15	85008	11.3505	93.435	4.53727	112.11	4.71948	0	0	643	6.4677	25660000	17.0604	2760385	14.8309	1	1	1.80914e+06	14.4084	0	0	0	1	0	154	6766	12628	93	8	0	0	71.1097	85.276	1	0	0	0	1	0	0	0	0	0	0	0	0	0	0
2020-04-20	Singapore	16	15336	9.63802	93.435	4.53727	113.275	4.72982	435015	12.9831	557281	13.2308	25660000	17.0604	5685807	15.5535	1	1	2.54598e+06	14.75	0	0	0	1	0	144	6766	15243	93	12	0	0	71.1097	75.5577	1	0	0	0	1	0	0	0	0	0	0	0	0	0	0
2020-04-21	Solomon Islands	17	272	5.60947	93.435	4.53727	142.082	4.95641	17865	9.79065	228	5.43372	25660000	17.0604	691191	13.4462	1	0	3.10584e+06	14.9488	0	1	1	1	0	140	6766	0	93	0	0	0	71.1097	0	1	0	0	0	1	0	0	0	0	0	0	0	0	0	0
2020-04-22	South Africa	18	472	6.1591	93.435	4.53727	162.733	5.09211	495482	13.1133	3643828	15.1085	25660000	17.0604	58801927	17.8897	1	1	2.18742e+06	14.5982	0	0	0	1	0	140	6766	4294	93	98	0	0	71.1097	66.6377	1	0	0	0	1	0	0	0	0	0	0	0	0	0	0
2020-04-23	Sri Lanka	19	870	6.76964	93.435	4.53727	161.78	5.08624	19781	9.89253	5064954	15.4379	25660000	17.0604	21919000	16.9029	1	0	2.21538e+06	14.6109	0	1	1	1	0	141	6766	520	93	5	0	0	71.1097	91.4197	1	0	0	0	1	0	0	0	0	0	0	0	0	0	0
2020-04-24	Taiwan	20	19890	9.89802	93.435	4.53727	158.309	5.06455	0	0	0	0	25660000	17.0604	23726185	16.9821	1	0	2.49793e+06	14.731	0	1	1	1	0	18	6766	107	93	1	0	0	71.1097	31.48	1	0	0	0	1	0	0	0	0	0	0	0	0	0	0
2020-04-25	Thailand	21	696	6.54679	93.435	4.53727	110.068	4.7011	470496	13.0615	1723805	14.36	25660000	17.0604	71475664	18.0849	0	1	2.38719e+06	14.6856	0	0	0	1	0	140	6766	1303	93	44	0	0	71.1097	76.264	1	0	0	0	1	0	0	0	0	0	0	0	0	0	0
2020-04-26	Tonga	22	0	0	93.435	4.53727	128.681	4.85734	0	0	20356	9.92118	25660000	17.0604	105254	11.5641	1	0	3.29898e+06	15.0091	0	1	1	1	0	140	6766	0	93	0	0	0	71.1097	0	1	0	0	0	1	0	0	0	0	0	0	0	0	0	0
2020-04-27	UK	23	12023	9.39466	93.435	4.53727	120.51	4.79174	5621960	15.5422	124148286	18.637	25660000	17.0604	9287289	16.0442	1	1	1.83975e+06	14.4251	0	0	1	1	0	154	6766	139059	93	33854	0	0	71.1097	79.63	1	0	0	0	1	0	0	0	0	0	0	0	0	0	0
2020-04-28	United Arab Emirates	24	3564	8.17892	93.435	4.53727	112.22	4.72046	0	0	37825	10.5408	25660000	17.0604	67081000	18.0214	1	1	1.69913e+06	14.3456	0	1	0	1	0	140	6766	11817	93	99	0	0	71.1097	72.69	1	0	0	0	1	0	0	0	0	0	0	0	0	0	0
2020-04-29	USA	25	18984	9.8514	93.435	4.53727	117.58	4.76712	3880360	15.1714	6860043	15.7412	25660000	17.0604	331501080	19.6191	1	1	2.35545e+06	14.6722	0	0	0	1	0	156	6766	888960	93	61274	0	0	71.1097	72.69	1	0	0	0	1	0	0	0	0	0	0	0	0	0	0
2020-04-29	Vietnam	26	521	6.25767	93.435	4.53727	166.79	5.11674	8537	9.05228	17626894	16.6849	25660000	17.0604	96648685	18.3866	1	1	2.43923e+06	14.7072	0	0	0	1	0	179	6766	58	93	0	0	0	71.1097	162.67	1	0	0	0	1	0	0	0	0	0	0	0	0	0	0
2020-05-01	Brunei	1	3048	8.02257	91.3103	4.51426	100.946	4.61459	38896	10.5687	3214	8.07558	25660000	17.0604	441725	12.9984	1	1	2.6268e+06	14.7813	0	0	0	1	0	144	7202	3	103	1	0	0	67.3523	55.2865	1	0	0	0	0	1	0	0	0	0	0	0	0	1	0
2020-05-02	Canada	2	0	0	91.3103	4.51426	116.857	4.76095	1029485	13.8446	1456033	14.1912	25660000	17.0604	38037204	17.4541	1	1	2.24219e+06	14.623	0	0	0	1	0	176	7202	34853	103	3773	0	0	67.3523	72.8068	1	0	0	0	0	1	0	0	0	0	0	0	0	0	1
2020-05-03	Chile	3	303	5.71703	91.3103	4.51426	135.403	4.90826	51472	10.8488	431707	12.9755	25660000	17.0604	19300315	16.7756	1	1	2.72558e+06	14.8182	0	0	0	1	0	163	7202	105848	103	827	0	0	67.3523	79.139	1	0	0	0	0	1	0	0	0	0	0	0	0	0	0
2020-05-04	China	4	9688	9.17875	91.3103	4.51426	126.874	4.84319	553284	13.2236	120788559	18.6096	25660000	17.0604	1411100000	21.0676	1	1	2.36518e+06	14.6764	0	0	0	1	0	18	7202	642	103	1	0	0	67.3523	74.6819	1	0	0	0	0	1	0	0	0	0	0	0	0	0	0
2020-05-06	Fiji	5	734	6.59987	91.3103	4.51426	131.293	4.87743	89285	11.3996	368553	12.8173	25660000	17.0604	920422	13.7326	1	0	3.25977e+06	14.9972	0	1	1	1	0	140	7202	0	103	0	0	0	67.3523	74.9719	1	0	0	0	0	1	0	0	0	0	0	0	0	0	0
2020-05-07	Hong Kong (SAR)	6	8911	9.09515	91.3103	4.51426	136.112	4.91348	384500	12.8597	2143924	14.5781	25660000	17.0604	7481000	15.8279	1	1	2.4499e+06	14.7116	0	0	0	1	0	144	7202	47	103	0	0	0	67.3523	63.2039	1	0	0	0	0	1	0	0	0	0	0	0	0	0	0
2020-05-08	India	7	3584	8.18451	91.3103	4.51426	179.928	5.19256	27319	10.2154	183888416	19.0298	25660000	17.0604	1396387127	21.0572	1	1	2.08445e+06	14.55	0	0	0	1	0	141	7202	155746	103	4254	0	0	67.3523	83.3297	1	0	0	0	0	1	0	0	0	0	0	0	0	0	0
2020-05-09	Indonesia	8	7408	8.91045	91.3103	4.51426	154.023	5.0371	462000	13.0433	8461633	15.9511	25660000	17.0604	271857970	19.4208	1	1	2.66431e+06	14.7955	0	0	0	1	0	142	7202	16355	103	821	0	0	67.3523	73.8219	1	0	0	0	0	1	0	0	0	0	0	0	0	0	0
2020-05-10	Japan	9	6240	8.7389	91.3103	4.51426	105.572	4.65939	556574	13.2296	1066091	13.8795	25660000	17.0604	126261000	18.6539	1	0	2.52658e+06	14.7424	0	1	1	1	0	3	7202	2457	103	417	0	0	67.3523	41.9942	1	0	0	0	0	1	0	0	0	0	0	0	0	0	0
2020-05-11	Korea	10	3464	8.15047	91.3103	4.51426	115.129	4.74605	224087	12.3198	5161665	15.4568	25660000	17.0604	25867467	17.0685	0	1	2.44391e+06	14.7091	0	0	0	1	0	141	7202	729	103	23	0	0	67.3523	71.9503	1	0	0	0	0	1	0	0	0	0	0	0	0	0	0
2020-05-12	Malaysia	11	2320	7.74975	91.3103	4.51426	117.88	4.76967	225545	12.3263	6783420	15.73	25660000	17.0604	33199993	17.3181	1	1	2.52051e+06	14.74	0	0	0	1	0	144	7202	1817	103	12	0	0	67.3523	71.9503	1	0	0	0	0	1	0	0	0	0	0	0	0	0	0
2020-05-13	Mauritius	12	0	0	91.3103	4.51426	134.489	4.90148	6038	8.70599	110807	11.6156	25660000	17.0604	1265740	14.0512	1	0	2.24274e+06	14.6232	0	1	1	1	0	176	7202	3	103	0	0	0	67.3523	79.7781	1	0	0	0	0	1	0	0	0	0	0	0	0	0	0
2020-05-16	New Zealand	13	18205	9.80951	91.3103	4.51426	1	0	2785827	14.8401	10744858	16.1899	25660000	17.0604	5090200	15.4428	1	0	3.33103e+06	15.0188	0	1	1	1	0	179	7202	26	103	3	0	0	67.3523	57.7923	1	0	0	0	0	1	0	0	0	0	0	0	0	0	0
2020-05-18	Philippines	14	1452	7.28139	91.3103	4.51426	131.426	4.87845	171491	12.0523	32964362	17.3109	25660000	17.0604	112190977	18.5357	1	0	2.62019e+06	14.7788	0	1	1	1	0	140	7202	9598	103	389	0	0	67.3523	94.5077	1	0	0	0	0	1	0	0	0	0	0	0	0	0	0
2020-05-19	Qatar	15	52220	10.8632	91.3103	4.51426	111.446	4.71354	0	0	643	6.4677	25660000	17.0604	2760385	14.8309	1	1	1.80914e+06	14.4084	0	0	0	1	0	154	7202	43501	103	28	0	0	67.3523	83.33	1	0	0	0	0	1	0	0	0	0	0	0	0	0	0
2020-05-20	Singapore	16	22912	10.0395	91.3103	4.51426	113.811	4.73454	435015	12.9831	557281	13.2308	25660000	17.0604	5685807	15.5535	1	1	2.54598e+06	14.75	0	0	0	1	0	144	7202	18715	103	8	0	0	67.3523	80.0165	1	0	0	0	0	1	0	0	0	0	0	0	0	0	0
2020-05-21	Solomon Islands	17	272	5.60947	91.3103	4.51426	140.69	4.94656	17865	9.79065	228	5.43372	25660000	17.0604	691191	13.4462	1	0	3.10584e+06	14.9488	0	1	1	1	0	140	7202		103	0	0	0	67.3523	0	1	0	0	0	0	1	0	0	0	0	0	0	0	0	0
2020-05-22	South Africa	18	0	0	91.3103	4.51426	161.853	5.08669	495482	13.1133	3643828	15.1085	25660000	17.0604	58801927	17.8897	1	1	2.18742e+06	14.5982	0	0	0	1	0	140	7202	27036	103	580	0	0	67.3523	43.5626	1	0	0	0	0	1	0	0	0	0	0	0	0	0	0
2020-05-23	Sri Lanka	19	3516	8.16536	91.3103	4.51426	162.5	5.09068	19781	9.89253	5064954	15.4379	25660000	17.0604	21919000	16.9029	1	0	2.21538e+06	14.6109	0	1	1	1	0	141	7202	970	103	3	0	0	67.3523	80.2577	1	0	0	0	0	1	0	0	0	0	0	0	0	0	0
2020-05-24	Taiwan	20	4592	8.43229	91.3103	4.51426	158.309	5.06455	0	0	0	0	25660000	17.0604	23726185	16.9821	1	0	2.49793e+06	14.731	0	1	1	1	0	18	7202	13	103	1	0	0	67.3523	27.1832	1	0	0	0	0	1	0	0	0	0	0	0	0	0	0
2020-05-25	Thailand	21	1338	7.19968	91.3103	4.51426	110.079	4.7012	470496	13.0615	1723805	14.36	25660000	17.0604	71475664	18.0849	0	1	2.38719e+06	14.6856	0	0	0	1	0	140	7202	127	103	3	0	0	67.3523	75	1	0	0	0	0	1	0	0	0	0	0	0	0	0	0
2020-05-26	Tonga	22	0	0	91.3103	4.51426	128.166	4.85333	0	0	20356	9.92118	25660000	17.0604	105254	11.5641	1	0	3.29898e+06	15.0091	0	1	1	1	0	140	7202	0	103	0	0	0	67.3523	0	1	0	0	0	0	1	0	0	0	0	0	0	0	0	0
2020-05-27	UK	23	6940	8.8452	91.3103	4.51426	120.51	4.79174	5621960	15.5422	124148286	18.637	25660000	17.0604	9287289	16.0442	1	1	1.83975e+06	14.4251	0	0	1	1	0	154	7202	78602	103	13492	0	0	67.3523	74.2252	1	0	0	0	0	1	0	0	0	0	0	0	0	0	0
2020-05-28	United Arab Emirates	24	11173	9.32134	91.3103	4.51426	112.319	4.72134	0	0	37825	10.5408	25660000	17.0604	67081000	18.0214	1	1	1.69913e+06	14.3456	0	1	0	1	0	140	7202	22076	103	159	0	0	67.3523	72.69	1	0	0	0	0	1	0	0	0	0	0	0	0	0	0
2020-05-29	USA	25	19339	9.86993	91.3103	4.51426	117.582	4.76714	3880360	15.1714	6860043	15.7412	25660000	17.0604	331501080	19.6191	1	1	2.35545e+06	14.6722	0	0	0	1	0	156	7202	709914	103	41211	0	0	67.3523	72.69	1	0	0	0	0	1	0	0	0	0	0	0	0	0	0
2020-05-31	Vietnam	26	5480	8.60904	91.3103	4.51426	166.74	5.11643	8537	9.05228	17626894	16.6849	25660000	17.0604	96648685	18.3866	1	1	2.43923e+06	14.7072	0	0	0	1	0	179	7202	58	103	0	0	0	67.3523	71.4735	1	0	0	0	0	1	0	0	0	0	0	0	0	0	0
2020-06-01	Brunei	1	3810	8.24565	92.3652	4.52575	101.046	4.61558	38896	10.5687	3214	8.07558	25660000	17.0604	441725	12.9984	1	1	2.6268e+06	14.7813	0	0	0	1	0	144	7920	0	104	1	0	0	55.0143	49.1937	1	0	0	0	0	0	1	0	0	0	0	0	0	1	0
2020-06-02	Canada	2	0	0	92.3652	4.52575	117.802	4.769	1029485	13.8446	1456033	14.1912	25660000	17.0604	38037204	17.4541	1	1	2.24219e+06	14.623	0	0	0	1	0	176	7920	12541	104	894	0	0	55.0143	70.275	1	0	0	0	0	0	1	0	0	0	0	0	0	0	1
2020-06-03	Chile	3	1216	7.10414	92.3652	4.52575	135.313	4.90759	51472	10.8488	431707	12.9755	25660000	17.0604	19300315	16.7756	1	1	2.72558e+06	14.8182	0	0	0	1	0	163	7920	155843	104	4634	0	0	55.0143	81.02	1	0	0	0	0	0	1	0	0	0	0	0	0	0	0
2020-06-04	China	4	14444	9.5781	92.3652	4.52575	126.874	4.84319	553284	13.2236	120788559	18.6096	25660000	17.0604	1411100000	21.0676	1	1	2.36518e+06	14.6764	0	0	0	1	0	18	7920	693	104	0	0	0	55.0143	78.4867	1	0	0	0	0	0	1	0	0	0	0	0	0	0	0
2020-06-06	Fiji	5	367	5.90808	92.3652	4.52575	128.768	4.85801	89285	11.3996	368553	12.8173	25660000	17.0604	920422	13.7326	1	0	3.25977e+06	14.9972	0	1	1	1	0	140	7920	0	104	0	0	0	55.0143	67.562	1	0	0	0	0	0	1	0	0	0	0	0	0	0	0
2020-06-07	Hong Kong (SAR)	6	15012	9.61667	92.3652	4.52575	135.977	4.91248	384500	12.8597	2143924	14.5781	25660000	17.0604	7481000	15.8279	1	1	2.4499e+06	14.7116	0	0	0	1	0	144	7920	121	104	3	0	0	55.0143	48.336	1	0	0	0	0	0	1	0	0	0	0	0	0	0	0
2020-06-08	India	7	4096	8.31801	92.3652	4.52575	181.002	5.19851	27319	10.2154	183888416	19.0298	25660000	17.0604	1396387127	21.0572	1	1	2.08445e+06	14.55	0	0	0	1	0	141	7920	394872	104	11992	0	0	55.0143	87.5	1	0	0	0	0	0	1	0	0	0	0	0	0	0	0
2020-06-09	Indonesia	8	5312	8.57791	92.3652	4.52575	154.302	5.03891	462000	13.0433	8461633	15.9511	25660000	17.0604	271857970	19.4208	1	1	2.66431e+06	14.7955	0	0	0	1	0	142	7920	29912	104	1263	0	0	55.0143	68.738	1	0	0	0	0	0	1	0	0	0	0	0	0	0	0
2020-06-10	Japan	9	6000	8.69968	92.3652	4.52575	105.361	4.65739	556574	13.2296	1066091	13.8795	25660000	17.0604	126261000	18.6539	1	0	2.52658e+06	14.7424	0	1	1	1	0	3	7920	1864	104	76	0	0	55.0143	27.7767	1	0	0	0	0	0	1	0	0	0	0	0	0	0	0
2020-06-11	Korea	10	3870	8.26127	92.3652	4.52575	115.442	4.74876	224087	12.3198	5161665	15.4568	25660000	17.0604	25867467	17.0685	0	1	2.44391e+06	14.7091	0	0	0	1	0	141	7920	1347	104	11	0	0	55.0143	60.7117	1	0	0	0	0	0	1	0	0	0	0	0	0	0	0
2020-06-12	Malaysia	11	870	6.76964	92.3652	4.52575	119.08	4.7798	225545	12.3263	6783420	15.73	25660000	17.0604	33199993	17.3181	1	1	2.52051e+06	14.74	0	0	0	1	0	144	7920	820	104	6	0	0	55.0143	60.7117	1	0	0	0	0	0	1	0	0	0	0	0	0	0	0
2020-06-13	Mauritius	12	550	6.31173	92.3652	4.52575	131.857	4.88172	6038	8.70599	110807	11.6156	25660000	17.0604	1265740	14.0512	1	0	2.24274e+06	14.6232	0	1	1	1	0	176	7920	6	104	0	0	0	55.0143	50.1813	1	0	0	0	0	0	1	0	0	0	0	0	0	0	0
2020-06-16	New Zealand	13	22234	10.0094	92.3652	4.52575	1	0	2785827	14.8401	10744858	16.1899	25660000	17.0604	5090200	15.4428	1	0	3.33103e+06	15.0188	0	1	1	1	0	179	7920	24	104	0	0	0	55.0143	26.9127	1	0	0	0	0	0	1	0	0	0	0	0	0	0	0
2020-06-18	Philippines	14	1344	7.20415	92.3652	4.52575	132.186	4.88421	171491	12.0523	32964362	17.3109	25660000	17.0604	112190977	18.5357	1	0	2.62019e+06	14.7788	0	1	1	1	0	140	7920	19428	104	309	0	0	55.0143	81.3593	1	0	0	0	0	0	1	0	0	0	0	0	0	0	0
2020-06-19	Qatar	15	57364	10.9572	92.3652	4.52575	111.749	4.71626	0	0	643	6.4677	25660000	17.0604	2760385	14.8309	1	1	1.80914e+06	14.4084	0	0	0	1	0	154	7920	39178	104	75	0	0	55.0143	84.6303	1	0	0	0	0	0	1	0	0	0	0	0	0	0	0
2020-06-20	Singapore	16	44619	10.7059	92.3652	4.52575	113.834	4.73474	435015	12.9831	557281	13.2308	25660000	17.0604	5685807	15.5535	1	1	2.54598e+06	14.75	0	0	0	1	0	144	7920	9023	104	3	0	0	55.0143	65.6187	1	0	0	0	0	0	1	0	0	0	0	0	0	0	0
2020-06-21	Solomon Islands	17	400	5.99396	92.3652	4.52575	135.751	4.91082	17865	9.79065	228	5.43372	25660000	17.0604	691191	13.4462	1	0	3.10584e+06	14.9488	0	1	1	1	0	140	7920		104	0	0	0	55.0143	0	1	0	0	0	0	0	1	0	0	0	0	0	0	0	0
2020-06-22	South Africa	18	0	0	92.3652	4.52575	162.557	5.09103	495482	13.1133	3643828	15.1085	25660000	17.0604	58801927	17.8897	1	1	2.18742e+06	14.5982	0	0	0	1	0	140	7920	118526	104	1974	0	0	55.0143	53.6717	1	0	0	0	0	0	1	0	0	0	0	0	0	0	0
2020-06-23	Sri Lanka	19	2344	7.76004	92.3652	4.52575	164.78	5.10461	19781	9.89253	5064954	15.4379	25660000	17.0604	21919000	16.9029	1	0	2.21538e+06	14.6109	0	1	1	1	0	141	7920	414	104	1	0	0	55.0143	60.8047	1	0	0	0	0	0	1	0	0	0	0	0	0	0	0
2020-06-24	Taiwan	20	5582	8.62748	92.3652	4.52575	158.309	5.06455	0	0	0	0	25660000	17.0604	23726185	16.9821	1	0	2.49793e+06	14.731	0	1	1	1	0	18	7920	5	104	0	0	0	55.0143	25.096	1	0	0	0	0	0	1	0	0	0	0	0	0	0	0
2020-06-25	Thailand	21	1926	7.56372	92.3652	4.52575	111.801	4.71672	470496	13.0615	1723805	14.36	25660000	17.0604	71475664	18.0849	0	1	2.38719e+06	14.6856	0	0	0	1	0	140	7920	90	104	1	0	0	55.0143	62.9933	1	0	0	0	0	0	1	0	0	0	0	0	0	0	0
2020-06-26	Tonga	22	0	0	92.3652	4.52575	126.622	4.84121	0	0	20356	9.92118	25660000	17.0604	105254	11.5641	1	0	3.29898e+06	15.0091	0	1	1	1	0	140	7920	0	104	0	0	0	55.0143	0	1	0	0	0	0	0	1	0	0	0	0	0	0	0	0
2020-06-27	UK	23	1416	7.2563	92.3652	4.52575	120.732	4.79358	5621960	15.5422	124148286	18.637	25660000	17.0604	9287289	16.0442	1	1	1.83975e+06	14.4251	0	0	1	1	0	154	7920	27565	104	3712	0	0	55.0143	70.866	1	0	0	0	0	0	1	0	0	0	0	0	0	0	0
2020-06-28	United Arab Emirates	24	31923	10.3711	92.3652	4.52575	112.687	4.72462	0	0	37825	10.5408	25660000	17.0604	67081000	18.0214	1	1	1.69913e+06	14.3456	0	1	0	1	0	140	7920	14110	104	51	0	0	55.0143	70.7113	1	0	0	0	0	0	1	0	0	0	0	0	0	0	0
2020-06-29	USA	25	16649	9.72017	92.3652	4.52575	118.225	4.77259	3880360	15.1714	6860043	15.7412	25660000	17.0604	331501080	19.6191	1	1	2.35545e+06	14.6722	0	0	0	1	0	156	7920	857952	104	19572	0	0	55.0143	70.7113	1	0	0	0	0	0	1	0	0	0	0	0	0	0	0
2020-06-30	Vietnam	26	734	6.59987	92.3652	4.52575	167.838	5.123	8537	9.05228	17626894	16.6849	25660000	17.0604	96648685	18.3866	1	1	2.43923e+06	14.7072	0	0	0	1	0	179	7920	27	104	0	0	0	55.0143	63.331	1	0	0	0	0	0	1	0	0	0	0	0	0	0	0
2020-07-01	Brunei	1	3810	8.24565	93.3889	4.53677	100.911	4.61424	38896	10.5687	3214	8.07558	25660000	17.0604	441725	12.9984	1	1	2.6268e+06	14.7813	0	0	0	1	0	144	17280	0	201	0	0	0	69.8194	47.5765	1	0	0	0	0	0	0	1	0	0	0	0	0	1	0
2020-07-02	Canada	2	0	0	93.3889	4.53677	117.802	4.769	1029485	13.8446	1456033	14.1912	25660000	17.0604	38037204	17.4541	1	1	2.24219e+06	14.623	0	0	0	1	0	176	17280	12278	201	259	0	0	69.8194	67.6074	1	0	0	0	0	0	0	1	0	0	0	0	0	0	1
2020-07-03	Chile	3	0	0	93.3889	4.53677	135.442	4.90854	51472	10.8488	431707	12.9755	25660000	17.0604	19300315	16.7756	1	1	2.72558e+06	14.8182	0	0	0	1	0	163	17280	76274	201	2712	0	0	69.8194	89.5632	1	0	0	0	0	0	0	1	0	0	0	0	0	0	0
2020-07-04	China	4	17374	9.76279	93.3889	4.53677	126.414	4.83956	553284	13.2236	120788559	18.6096	25660000	17.0604	1411100000	21.0676	1	1	2.36518e+06	14.6764	0	0	0	1	0	18	17280	1122	201	0	0	0	69.8194	78.24	1	0	0	0	0	0	0	1	0	0	0	0	0	0	0
2020-07-06	Fiji	5	0	0	93.3889	4.53677	129.227	4.86157	89285	11.3996	368553	12.8173	25660000	17.0604	920422	13.7326	1	0	3.25977e+06	14.9972	0	1	1	1	0	140	17280	9	201	1	0	0	69.8194	53.8816	1	0	0	0	0	0	0	1	0	0	0	0	0	0	0
2020-07-07	Hong Kong (SAR)	6	17928	9.79417	93.3889	4.53677	132.057	4.88323	384500	12.8597	2143924	14.5781	25660000	17.0604	7481000	15.8279	1	1	2.4499e+06	14.7116	0	0	0	1	0	144	17280	2067	201	20	0	0	69.8194	55.3797	1	0	0	0	0	0	0	1	0	0	0	0	0	0	0
2020-07-08	India	7	3072	8.03041	93.3889	4.53677	183.506	5.21224	27319	10.2154	183888416	19.0298	25660000	17.0604	1396387127	21.0572	1	1	2.08445e+06	14.55	0	0	0	1	0	141	17280	1110507	201	19111	0	0	69.8194	87.5	1	0	0	0	0	0	0	1	0	0	0	0	0	0	0
2020-07-09	Indonesia	8	4737	8.46337	93.3889	4.53677	154.141	5.03787	462000	13.0433	8461633	15.9511	25660000	17.0604	271857970	19.4208	1	1	2.66431e+06	14.7955	0	0	0	1	0	142	17280	51991	201	2255	0	0	69.8194	62.5	1	0	0	0	0	0	0	1	0	0	0	0	0	0	0
2020-07-10	Japan	9	6480	8.77663	93.3889	4.53677	105.467	4.6584	556574	13.2296	1066091	13.8795	25660000	17.0604	126261000	18.6539	1	0	2.52658e+06	14.7424	0	1	1	1	0	3	17280	17651	201	39	0	0	69.8194	27.9903	1	0	0	0	0	0	0	1	0	0	0	0	0	0	0
2020-07-11	Korea	10	2977	7.99901	93.3889	4.53677	115.349	4.74796	224087	12.3198	5161665	15.4568	25660000	17.0604	25867467	17.0685	0	1	2.44391e+06	14.7091	0	0	0	1	0	141	17280	1486	201	19	0	0	69.8194	49.7332	1	0	0	0	0	0	0	1	0	0	0	0	0	0	0
2020-07-12	Malaysia	11	7400	8.90937	93.3889	4.53677	119.88	4.78649	225545	12.3263	6783420	15.73	25660000	17.0604	33199993	17.3181	1	1	2.52051e+06	14.74	0	0	0	1	0	144	17280	337	201	4	0	0	69.8194	49.7332	1	0	0	0	0	0	0	1	0	0	0	0	0	0	0
2020-07-13	Mauritius	12	0	0	93.3889	4.53677	131.481	4.87886	6038	8.70599	110807	11.6156	25660000	17.0604	1265740	14.0512	1	0	2.24274e+06	14.6232	0	1	1	1	0	176	17280	3	201	0	0	0	69.8194	22.22	1	0	0	0	0	0	0	1	0	0	0	0	0	0	0
2020-07-16	New Zealand	13	33998	10.4341	93.3889	4.53677	1	0	2785827	14.8401	10744858	16.1899	25660000	17.0604	5090200	15.4428	1	0	3.33103e+06	15.0188	0	1	1	1	0	179	17280	34	201	0	0	0	69.8194	22.22	1	0	0	0	0	0	0	1	0	0	0	0	0	0	0
2020-07-18	Philippines	14	726	6.58893	93.3889	4.53677	132.819	4.88899	171491	12.0523	32964362	17.3109	25660000	17.0604	112190977	18.5357	1	0	2.62019e+06	14.7788	0	1	1	1	0	140	17280	55840	201	757	0	0	69.8194	77.3881	1	0	0	0	0	0	0	1	0	0	0	0	0	0	0
2020-07-19	Qatar	15	48208	10.7833	93.3889	4.53677	111.493	4.71396	0	0	643	6.4677	25660000	17.0604	2760385	14.8309	1	1	1.80914e+06	14.4084	0	0	0	1	0	154	17280	14607	201	61	0	0	69.8194	80.2013	1	0	0	0	0	0	0	1	0	0	0	0	0	0	0
2020-07-20	Singapore	16	39071	10.5732	93.3889	4.53677	113.465	4.7315	435015	12.9831	557281	13.2308	25660000	17.0604	5685807	15.5535	1	1	2.54598e+06	14.75	0	0	0	1	0	144	17280	8298	201	1	0	0	69.8194	56.48	1	0	0	0	0	0	0	1	0	0	0	0	0	0	0
2020-07-21	Solomon Islands	17	1088	6.99302	93.3889	4.53677	133.978	4.89768	17865	9.79065	228	5.43372	25660000	17.0604	691191	13.4462	1	0	3.10584e+06	14.9488	0	1	1	1	0	140	17280	0	201	0	0	0	69.8194	0	1	0	0	0	0	0	0	1	0	0	0	0	0	0	0
2020-07-22	South Africa	18	0	0	93.3889	4.53677	164.844	5.105	495482	13.1133	3643828	15.1085	25660000	17.0604	58801927	17.8897	1	1	2.18742e+06	14.5982	0	0	0	1	0	140	17280	341974	201	5348	0	0	69.8194	53.4787	1	0	0	0	0	0	0	1	0	0	0	0	0	0	0
2020-07-23	Sri Lanka	19	2664	7.88796	93.3889	4.53677	164.78	5.10461	19781	9.89253	5064954	15.4379	25660000	17.0604	21919000	16.9029	1	0	2.21538e+06	14.6109	0	1	1	1	0	141	17280	768	201	0	0	0	69.8194	52.2677	1	0	0	0	0	0	0	1	0	0	0	0	0	0	0
2020-07-24	Taiwan	20	5044	8.52615	93.3889	4.53677	173.059	5.15363	0	0	0	0	25660000	17.0604	23726185	16.9821	1	0	2.49793e+06	14.731	0	1	1	1	0	18	17280	20	201	0	0	0	69.8194	23.15	1	0	0	0	0	0	0	1	0	0	0	0	0	0	0
2020-07-25	Thailand	21	0	0	93.3889	4.53677	112.54	4.72331	470496	13.0615	1723805	14.36	25660000	17.0604	71475664	18.0849	0	1	2.38719e+06	14.6856	0	0	0	1	0	140	17280	141	201	0	0	0	69.8194	52.78	1	0	0	0	0	0	0	1	0	0	0	0	0	0	0
2020-07-26	Tonga	22	0	0	93.3889	4.53677	127.265	4.84628	0	0	20356	9.92118	25660000	17.0604	105254	11.5641	1	0	3.29898e+06	15.0091	0	1	1	1	0	140	17280	0	201	0	0	0	69.8194	0	1	0	0	0	0	0	0	1	0	0	0	0	0	0	0
2020-07-27	UK	23	0	0	93.3889	4.53677	121.176	4.79725	5621960	15.5422	124148286	18.637	25660000	17.0604	9287289	16.0442	1	1	1.83975e+06	14.4251	0	0	1	1	0	154	17280	19471	201	1150	0	0	69.8194	65.3813	1	0	0	0	0	0	0	1	0	0	0	0	0	0	0
2020-07-28	United Arab Emirates	24	33781	10.4277	93.3889	4.53677	112.05	4.71895	0	0	37825	10.5408	25660000	17.0604	67081000	18.0214	1	1	1.69913e+06	14.3456	0	1	0	1	0	140	17280	11839	201	36	0	0	69.8194	68.98	1	0	0	0	0	0	0	1	0	0	0	0	0	0	0
2020-07-29	USA	25	22987	10.0427	93.3889	4.53677	118.823	4.77764	3880360	15.1714	6860043	15.7412	25660000	17.0604	331501080	19.6191	1	1	2.35545e+06	14.6722	0	0	0	1	0	156	17280	1900715	201	26507	0	0	69.8194	68.98	1	0	0	0	0	0	0	1	0	0	0	0	0	0	0
2020-07-30	Vietnam	26	5299	8.57546	93.3889	4.53677	168.508	5.12698	8537	9.05228	17626894	16.6849	25660000	17.0604	96648685	18.3866	1	1	2.43923e+06	14.7072	0	0	0	1	0	179	17280	203	201	3	0	0	69.8194	58.7252	1	0	0	0	0	0	0	1	0	0	0	0	0	0	0
2020-08-01	Brunei	1	1524	7.32975	94.3849	4.54738	100.757	4.61271	38896	10.5687	3214	8.07558	25660000	17.0604	441725	12.9984	1	1	2.6268e+06	14.7813	0	0	0	1	0	144	25819	3	657	0	0	0	75.1019	39.9026	1	0	0	0	0	0	0	0	1	0	0	0	0	1	0
2020-08-02	Canada	2	0	0	94.3849	4.54738	117.63	4.76755	1029485	13.8446	1456033	14.1912	25660000	17.0604	38037204	17.4541	1	1	2.24219e+06	14.623	0	0	0	1	0	176	25819	12708	657	166	0	0	75.1019	66.861	1	0	0	0	0	0	0	0	1	0	0	0	0	0	1
2020-08-03	Chile	3	0	0	94.3849	4.54738	135.622	4.90987	51472	10.8488	431707	12.9755	25660000	17.0604	19300315	16.7756	1	1	2.72558e+06	14.8182	0	0	0	1	0	163	25819	56059	657	1832	0	0	75.1019	88.2174	1	0	0	0	0	0	0	0	1	0	0	0	0	0	0
2020-08-04	China	4	17176	9.75133	94.3849	4.54738	128.138	4.85311	553284	13.2236	120788559	18.6096	25660000	17.0604	1411100000	21.0676	1	1	2.36518e+06	14.6764	0	0	0	1	0	18	25819	1272	657	0	0	0	75.1019	78.24	1	0	0	0	0	0	0	0	1	0	0	0	0	0	0
2020-08-06	Fiji	5	0	0	94.3849	4.54738	128.08	4.85265	89285	11.3996	368553	12.8173	25660000	17.0604	920422	13.7326	1	0	3.25977e+06	14.9972	0	1	1	1	0	140	25819	1	657	1	0	0	75.1019	51.85	1	0	0	0	0	0	0	0	1	0	0	0	0	0	0
2020-08-07	Hong Kong (SAR)	6	21546	9.97799	94.3849	4.54738	135.03	4.9055	384500	12.8597	2143924	14.5781	25660000	17.0604	7481000	15.8279	1	1	2.4499e+06	14.7116	0	0	0	1	0	144	25819	1538	657	62	0	0	75.1019	66.67	1	0	0	0	0	0	0	0	1	0	0	0	0	0	0
2020-08-08	India	7	2304	7.74284	94.3849	4.54738	184.459	5.21743	27319	10.2154	183888416	19.0298	25660000	17.0604	1396387127	21.0572	1	1	2.08445e+06	14.55	0	0	0	1	0	141	25819	1995178	657	28777	0	0	75.1019	85.65	1	0	0	0	0	0	0	0	1	0	0	0	0	0	0
2020-08-09	Indonesia	8	2478	7.81561	94.3849	4.54738	154.067	5.03739	462000	13.0433	8461633	15.9511	25660000	17.0604	271857970	19.4208	1	1	2.66431e+06	14.7955	0	0	0	1	0	142	25819	66420	657	2286	0	0	75.1019	60.6168	1	0	0	0	0	0	0	0	1	0	0	0	0	0	0
2020-08-10	Japan	9	6480	8.77663	94.3849	4.54738	105.572	4.65939	556574	13.2296	1066091	13.8795	25660000	17.0604	126261000	18.6539	1	0	2.52658e+06	14.7424	0	1	1	1	0	3	25819	32129	657	287	0	0	75.1019	32.7084	1	0	0	0	0	0	0	0	1	0	0	0	0	0	0
2020-08-11	Korea	10	3045	8.02158	94.3849	4.54738	115.997	4.75357	224087	12.3198	5161665	15.4568	25660000	17.0604	25867467	17.0685	0	1	2.44391e+06	14.7091	0	0	0	1	0	141	25819	5846	657	23	0	0	75.1019	63.7348	1	0	0	0	0	0	0	0	1	0	0	0	0	0	0
2020-08-12	Malaysia	11	7690	8.94781	94.3849	4.54738	120.08	4.78816	225545	12.3263	6783420	15.73	25660000	17.0604	33199993	17.3181	1	1	2.52051e+06	14.74	0	0	0	1	0	144	25819	364	657	2	0	0	75.1019	63.7348	1	0	0	0	0	0	0	0	1	0	0	0	0	0	0
2020-08-13	Mauritius	12	652	6.48158	94.3849	4.54738	131.982	4.88267	6038	8.70599	110807	11.6156	25660000	17.0604	1265740	14.0512	1	0	2.24274e+06	14.6232	0	1	1	1	0	176	25819	11	657	0	0	0	75.1019	22.22	1	0	0	0	0	0	0	0	1	0	0	0	0	0	0
2020-08-16	New Zealand	13	39171	10.5757	94.3849	4.54738	1	0	2785827	14.8401	10744858	16.1899	25660000	17.0604	5090200	15.4428	1	0	3.33103e+06	15.0188	0	1	1	1	0	179	25819	190	657	2	0	0	75.1019	52.4481	1	0	0	0	0	0	0	0	1	0	0	0	0	0	0
2020-08-18	Philippines	14	336	5.82008	94.3849	4.54738	132.692	4.88803	171491	12.0523	32964362	17.3109	25660000	17.0604	112190977	18.5357	1	0	2.62019e+06	14.7788	0	1	1	1	0	140	25819	127465	657	1535	0	0	75.1019	75.2087	1	0	0	0	0	0	0	0	1	0	0	0	0	0	0
2020-08-19	Qatar	15	53551	10.8884	94.3849	4.54738	112.029	4.71875	0	0	643	6.4677	25660000	17.0604	2760385	14.8309	1	1	1.80914e+06	14.4084	0	0	0	1	0	154	25819	8083	657	23	0	0	75.1019	77.78	1	0	0	0	0	0	0	0	1	0	0	0	0	0	0
2020-08-20	Singapore	16	53643	10.8901	94.3849	4.54738	114.185	4.73782	435015	12.9831	557281	13.2308	25660000	17.0604	5685807	15.5535	1	1	2.54598e+06	14.75	0	0	0	1	0	144	25819	4607	657	0	0	0	75.1019	56.48	1	0	0	0	0	0	0	0	1	0	0	0	0	0	0
2020-08-21	Solomon Islands	17	408	6.01372	94.3849	4.54738	133.092	4.89104	17865	9.79065	228	5.43372	25660000	17.0604	691191	13.4462	1	0	3.10584e+06	14.9488	0	1	1	1	0	140	25819		657	0	0	0	75.1019	0	1	0	0	0	0	0	0	0	1	0	0	0	0	0	0
2020-08-22	South Africa	18	0	0	94.3849	4.54738	165.02	5.10607	495482	13.1133	3643828	15.1085	25660000	17.0604	58801927	17.8897	1	1	2.18742e+06	14.5982	0	0	0	1	0	140	25819	133858	657	6144	0	0	75.1019	53.24	1	0	0	0	0	0	0	0	1	0	0	0	0	0	0
2020-08-23	Sri Lanka	19	2664	7.88796	94.3849	4.54738	165.38	5.10825	19781	9.89253	5064954	15.4379	25660000	17.0604	21919000	16.9029	1	0	2.21538e+06	14.6109	0	1	1	1	0	141	25819	234	657	1	0	0	75.1019	41.041	1	0	0	0	0	0	0	0	1	0	0	0	0	0	0
2020-08-24	Taiwan	20	3976	8.28828	94.3849	4.54738	173.059	5.15363	0	0	0	0	25660000	17.0604	23726185	16.9821	1	0	2.49793e+06	14.731	0	1	1	1	0	18	25819	24	657	0	0	0	75.1019	23.15	1	0	0	0	0	0	0	0	1	0	0	0	0	0	0
2020-08-25	Thailand	21	3531	8.16962	94.3849	4.54738	112.871	4.72625	470496	13.0615	1723805	14.36	25660000	17.0604	71475664	18.0849	0	1	2.38719e+06	14.6856	0	0	0	1	0	140	25819	102	657	0	0	0	75.1019	49.4632	1	0	0	0	0	0	0	0	1	0	0	0	0	0	0
2020-08-26	Tonga	22	0	0	94.3849	4.54738	127.137	4.84526	0	0	20356	9.92118	25660000	17.0604	105254	11.5641	1	0	3.29898e+06	15.0091	0	1	1	1	0	140	25819	0	657	0	0	0	75.1019	0	1	0	0	0	0	0	0	0	1	0	0	0	0	0	0
2020-08-27	UK	23	0	0	94.3849	4.54738	120.732	4.79358	5621960	15.5422	124148286	18.637	25660000	17.0604	9287289	16.0442	1	1	1.83975e+06	14.4251	0	0	1	1	0	154	25819	32692	657	547	0	0	75.1019	67.6361	1	0	0	0	0	0	0	0	1	0	0	0	0	0	0
2020-08-28	United Arab Emirates	24	42970	10.6683	94.3849	4.54738	111.898	4.71759	0	0	37825	10.5408	25660000	17.0604	67081000	18.0214	1	1	1.69913e+06	14.3456	0	1	0	1	0	140	25819	9725	657	33	0	0	75.1019	68.98	1	0	0	0	0	0	0	0	1	0	0	0	0	0	0
2020-08-29	USA	25	23572	10.0679	94.3849	4.54738	119.198	4.78079	3880360	15.1714	6860043	15.7412	25660000	17.0604	331501080	19.6191	1	1	2.35545e+06	14.6722	0	0	0	1	0	156	25819	1498159	657	28834	0	0	75.1019	68.98	1	0	0	0	0	0	0	0	1	0	0	0	0	0	0
2020-08-31	Vietnam	26	3195	8.06966	94.3849	4.54738	168.633	5.12772	8537	9.05228	17626894	16.6849	25660000	17.0604	96648685	18.3866	1	1	2.43923e+06	14.7072	0	0	0	1	0	179	25819	486	657	32	0	0	75.1019	77.7752	1	0	0	0	0	0	0	0	1	0	0	0	0	0	0
2020-09-01	Brunei	1	2032	7.61727	95.8243	4.56252	100.859	4.61372	38896	10.5687	3214	8.07558	25660000	17.0604	441725	12.9984	1	1	2.6268e+06	14.7813	0	0	0	1	0	144	27096	2	888	0	0	0	74.72	36.4827	1	0	0	0	0	0	0	0	0	1	0	0	0	1	0
2020-09-02	Canada	2	0	0	95.8243	4.56252	117.544	4.76682	1029485	13.8446	1456033	14.1912	25660000	17.0604	38037204	17.4541	1	1	2.24219e+06	14.623	0	0	0	1	0	176	27096	32966	888	197	0	0	74.72	64.2933	1	0	0	0	0	0	0	0	0	1	0	0	0	0	1
2020-09-03	Chile	3	0	0	95.8243	4.56252	136.487	4.91623	51472	10.8488	431707	12.9755	25660000	17.0604	19300315	16.7756	1	1	2.72558e+06	14.8182	0	0	0	1	0	163	27096	51265	888	1452	0	0	74.72	87.5	1	0	0	0	0	0	0	0	0	1	0	0	0	0	0
2020-09-04	China	4	18512	9.82623	95.8243	4.56252	128.368	4.8549	553284	13.2236	120788559	18.6096	25660000	17.0604	1411100000	21.0676	1	1	2.36518e+06	14.6764	0	0	0	1	0	18	27096	949	888	0	0	0	74.72	60.0927	1	0	0	0	0	0	0	0	0	1	0	0	0	0	0
2020-09-06	Fiji	5	0	0	95.8243	4.56252	127.391	4.84726	89285	11.3996	368553	12.8173	25660000	17.0604	920422	13.7326	1	0	3.25977e+06	14.9972	0	1	1	1	0	140	27096	4	888	0	0	0	74.72	51.85	1	0	0	0	0	0	0	0	0	1	0	0	0	0	0
2020-09-07	Hong Kong (SAR)	6	30954	10.3403	95.8243	4.56252	132.192	4.88425	384500	12.8597	2143924	14.5781	25660000	17.0604	7481000	15.8279	1	1	2.4499e+06	14.7116	0	0	0	1	0	144	27096	277	888	16	0	0	74.72	62.346	1	0	0	0	0	0	0	0	0	1	0	0	0	0	0
2020-09-08	India	7	6144	8.72339	95.8243	4.56252	186.486	5.22836	27319	10.2154	183888416	19.0298	25660000	17.0604	1396387127	21.0572	1	1	2.08445e+06	14.55	0	0	0	1	0	141	27096	2621418	888	33390	0	0	74.72	75.6467	1	0	0	0	0	0	0	0	0	1	0	0	0	0	0
2020-09-09	Indonesia	8					153.994	5.03691	462000	13.0433	8461633	15.9511	25660000	17.0604	271857970	19.4208	1	1	2.66431e+06	14.7955	0	0	0	1	0	142	27096	112212	888	3323	0	0	74.72	65.9567	1	0	0	0	0	0	0	0	0	1	0	0	0	0	0
2020-09-10	Japan	9					105.361	4.65739	556574	13.2296	1066091	13.8795	25660000	17.0604	126261000	18.6539	1	0	2.52658e+06	14.7424	0	1	1	1	0	3	27096	15194	888	275	0	0	74.72	34.356	1	0	0	0	0	0	0	0	0	1	0	0	0	0	0
2020-09-11	Korea	10	3005	8.00837	95.8243	4.56252	116.634	4.75904	224087	12.3198	5161665	15.4568	25660000	17.0604	25867467	17.0685	0	1	2.44391e+06	14.7091	0	0	0	1	0	141	27096	3707	888	91	0	0	74.72	62.4517	1	0	0	0	0	0	0	0	0	1	0	0	0	0	0
2020-09-12	Malaysia	11	6880	8.83652	95.8243	4.56252	120.08	4.78816	225545	12.3263	6783420	15.73	25660000	17.0604	33199993	17.3181	1	1	2.52051e+06	14.74	0	0	0	1	0	144	27096	1884	888	9	0	0	74.72	62.4517	1	0	0	0	0	0	0	0	0	1	0	0	0	0	0
2020-09-13	Mauritius	12	0	0	95.8243	4.56252	132.86	4.88929	6038	8.70599	110807	11.6156	25660000	17.0604	1265740	14.0512	1	0	2.24274e+06	14.6232	0	1	1	1	0	176	27096	26	888	0	0	0	74.72	22.22	1	0	0	0	0	0	0	0	0	1	0	0	0	0	0
2020-09-16	New Zealand	13	36403	10.5024	95.8243	4.56252	1	0	2785827	14.8401	10744858	16.1899	25660000	17.0604	5090200	15.4428	1	0	3.33103e+06	15.0188	0	1	1	1	0	179	27096	96	888	1	0	0	74.72	47.7913	1	0	0	0	0	0	0	0	0	1	0	0	0	0	0
2020-09-18	Philippines	14	1827	7.51098	95.8243	4.56252	132.819	4.88899	171491	12.0523	32964362	17.3109	25660000	17.0604	112190977	18.5357	1	0	2.62019e+06	14.7788	0	1	1	1	0	140	27096	90875	888	1946	0	0	74.72	69.4293	1	0	0	0	0	0	0	0	0	1	0	0	0	0	0
2020-09-19	Qatar	15	53702	10.8912	95.8243	4.56252	112.331	4.72145	0	0	643	6.4677	25660000	17.0604	2760385	14.8309	1	1	1.80914e+06	14.4084	0	0	0	1	0	154	27096	6982	888	17	0	0	74.72	67.4027	1	0	0	0	0	0	0	0	0	1	0	0	0	0	0
2020-09-20	Singapore	16	55033	10.9157	95.8243	4.56252	114.565	4.74114	435015	12.9831	557281	13.2308	25660000	17.0604	5685807	15.5535	1	1	2.54598e+06	14.75	0	0	0	1	0	144	27096	953	888	0	0	0	74.72	58.3627	1	0	0	0	0	0	0	0	0	1	0	0	0	0	0
2020-09-21	Solomon Islands	17	408	6.01372	95.8243	4.56252	133.471	4.89389	17865	9.79065	228	5.43372	25660000	17.0604	691191	13.4462	1	0	3.10584e+06	14.9488	0	1	1	1	0	140	27096	0	888	0	0	0	74.72	0	1	0	0	0	0	0	0	0	0	1	0	0	0	0	0
2020-09-22	South Africa	18	0	0	95.8243	4.56252	165.196	5.10713	495482	13.1133	3643828	15.1085	25660000	17.0604	58801927	17.8897	1	1	2.18742e+06	14.5982	0	0	0	1	0	140	27096	47298	888	2585	0	0	74.72	51.094	1	0	0	0	0	0	0	0	0	1	0	0	0	0	0
2020-09-23	Sri Lanka	19	4120	8.32385	95.8243	4.56252	166.7	5.1162	19781	9.89253	5064954	15.4379	25660000	17.0604	21919000	16.9029	1	0	2.21538e+06	14.6109	0	1	1	1	0	141	27096	331	888	1	0	0	74.72	27.684	1	0	0	0	0	0	0	0	0	1	0	0	0	0	0
2020-09-24	Taiwan	20	4280	8.36194	95.8243	4.56252	173.059	5.15363	0	0	0	0	25660000	17.0604	23726185	16.9821	1	0	2.49793e+06	14.731	0	1	1	1	0	18	27096	26	888	0	0	0	74.72	23.15	1	0	0	0	0	0	0	0	0	1	0	0	0	0	0
2020-09-25	Thailand	21	2889	7.96901	95.8243	4.56252	112.75	4.72517	470496	13.0615	1723805	14.36	25660000	17.0604	71475664	18.0849	0	1	2.38719e+06	14.6856	0	0	0	1	0	140	27096	152	888	1	0	0	74.72	47.776	1	0	0	0	0	0	0	0	0	1	0	0	0	0	0
2020-09-26	Tonga	22	0	0	95.8243	4.56252	127.909	4.85132	0	0	20356	9.92118	25660000	17.0604	105254	11.5641	1	0	3.29898e+06	15.0091	0	1	1	1	0	140	27096	0	888	0	0	0	74.72	0	1	0	0	0	0	0	0	0	0	1	0	0	0	0	0
2020-09-27	UK	23	0	0	95.8243	4.56252	121.176	4.79725	5621960	15.5422	124148286	18.637	25660000	17.0604	9287289	16.0442	1	1	1.83975e+06	14.4251	0	0	1	1	0	154	27096	117391	888	889	0	0	74.72	65.5693	1	0	0	0	0	0	0	0	0	1	0	0	0	0	0
2020-09-28	United Arab Emirates	24	50567	10.8311	95.8243	4.56252	111.321	4.71242	0	0	37825	10.5408	25660000	17.0604	67081000	18.0214	1	1	1.69913e+06	14.3456	0	1	0	1	0	140	27096	23959	888	35	0	0	74.72	67.2193	1	0	0	0	0	0	0	0	0	1	0	0	0	0	0
2020-09-29	USA	25	27516	10.2226	95.8243	4.56252	119.364	4.78218	3880360	15.1714	6860043	15.7412	25660000	17.0604	331501080	19.6191	1	1	2.35545e+06	14.6722	0	0	0	1	0	156	27096	1199937	888	23179	0	0	74.72	67.2193	1	0	0	0	0	0	0	0	0	1	0	0	0	0	0
2020-09-30	Vietnam	26	3112	8.04334	95.8243	4.56252	168.843	5.12897	8537	9.05228	17626894	16.6849	25660000	17.0604	96648685	18.3866	1	1	2.43923e+06	14.7072	0	0	0	1	0	179	27096	50	888	1	0	0	74.72	75.7543	1	0	0	0	0	0	0	0	0	1	0	0	0	0	0
2020-10-01	Brunei	1	2032	7.61727	97.3064	4.57786	101.318	4.61827	38896	10.5687	3214	8.07558	25660000	17.0604	441725	12.9984	1	1	2.6268e+06	14.7813	0	0	0	1	0	144	27595	2	907	0	0	0	67.2232	35.19	1	0	0	0	0	0	0	0	0	0	1	0	0	1	0
2020-10-02	Canada	2	0	0	97.3064	4.57786	118.06	4.77119	1029485	13.8446	1456033	14.1912	25660000	17.0604	38037204	17.4541	1	1	2.24219e+06	14.623	0	0	0	1	0	176	27595	75284	907	883	0	0	67.2232	65.101	1	0	0	0	0	0	0	0	0	0	1	0	0	0	1
2020-10-03	Chile	3	2006	7.6044	97.3064	4.57786	137.416	4.92301	51472	10.8488	431707	12.9755	25660000	17.0604	19300315	16.7756	1	1	2.72558e+06	14.8182	0	0	0	1	0	163	27595	47265	907	1466	0	0	67.2232	87.5	1	0	0	0	0	0	0	0	0	0	1	0	0	0	0
2020-10-04	China	4	18440	9.82233	97.3064	4.57786	128.023	4.85221	553284	13.2236	120788559	18.6096	25660000	17.0604	1411100000	21.0676	1	1	2.36518e+06	14.6764	0	0	0	1	0	18	27595	1381	907	0	0	0	67.2232	63.0658	1	0	0	0	0	0	0	0	0	0	1	0	0	0	0
2020-10-06	Fiji	5	819	6.7093	97.3064	4.57786	126.932	4.84365	89285	11.3996	368553	12.8173	25660000	17.0604	920422	13.7326	1	0	3.25977e+06	14.9972	0	1	1	1	0	140	27595	2	907	0	0	0	67.2232	49.1597	1	0	0	0	0	0	0	0	0	0	1	0	0	0	0
2020-10-07	Hong Kong (SAR)	6	28562	10.2599	97.3064	4.57786	135.436	4.9085	384500	12.8597	2143924	14.5781	25660000	17.0604	7481000	15.8279	1	1	2.4499e+06	14.7116	0	0	0	1	0	144	27595	236	907	0	0	0	67.2232	51.85	1	0	0	0	0	0	0	0	0	0	1	0	0	0	0
2020-10-08	India	7	3328	8.11043	97.3064	4.57786	188.871	5.24107	27319	10.2154	183888416	19.0298	25660000	17.0604	1396387127	21.0572	1	1	2.08445e+06	14.55	0	0	0	1	0	141	27595	1871498	907	23433	0	0	67.2232	65.3052	1	0	0	0	0	0	0	0	0	0	1	0	0	0	0
2020-10-09	Indonesia	8	5134	8.54384	97.3064	4.57786	154.097	5.03758	462000	13.0433	8461633	15.9511	25660000	17.0604	271857970	19.4208	1	1	2.66431e+06	14.7955	0	0	0	1	0	142	27595	123080	907	3129	0	0	67.2232	58.9465	1	0	0	0	0	0	0	0	0	0	1	0	0	0	0
2020-10-10	Japan	9	11988	9.39174	97.3064	4.57786	105.256	4.65639	556574	13.2296	1066091	13.8795	25660000	17.0604	126261000	18.6539	1	0	2.52658e+06	14.7424	0	1	1	1	0	3	27595	17744	907	195	0	0	67.2232	35.19	1	0	0	0	0	0	0	0	0	0	1	0	0	0	0
2020-10-11	Korea	10	3604	8.19008	97.3064	4.57786	115.986	4.75347	224087	12.3198	5161665	15.4568	25660000	17.0604	25867467	17.0685	0	1	2.44391e+06	14.7091	0	0	0	1	0	141	27595	2746	907	51	0	0	67.2232	61.4397	1	0	0	0	0	0	0	0	0	0	1	0	0	0	0
2020-10-12	Malaysia	11	8950	9.09952	97.3064	4.57786	120.18	4.78899	225545	12.3263	6783420	15.73	25660000	17.0604	33199993	17.3181	1	1	2.52051e+06	14.74	0	0	0	1	0	144	27595	20324	907	127	0	0	67.2232	61.4397	1	0	0	0	0	0	0	0	0	0	1	0	0	0	0
2020-10-13	Mauritius	12	0	0	97.3064	4.57786	132.985	4.89024	6038	8.70599	110807	11.6156	25660000	17.0604	1265740	14.0512	1	0	2.24274e+06	14.6232	0	1	1	1	0	176	27595	60	907	0	0	0	67.2232	32.8023	1	0	0	0	0	0	0	0	0	0	1	0	0	0	0
2020-10-16	New Zealand	13	53160	10.8811	97.3064	4.57786	1	0	2785827	14.8401	10744858	16.1899	25660000	17.0604	5090200	15.4428	1	0	3.33103e+06	15.0188	0	1	1	1	0	179	27595	111	907	0	0	0	67.2232	25.8935	1	0	0	0	0	0	0	0	0	0	1	0	0	0	0
2020-10-18	Philippines	14	618	6.42811	97.3064	4.57786	133.325	4.89279	171491	12.0523	32964362	17.3109	25660000	17.0604	112190977	18.5357	1	0	2.62019e+06	14.7788	0	1	1	1	0	140	27595	69035	907	1717	0	0	67.2232	68.2639	1	0	0	0	0	0	0	0	0	0	1	0	0	0	0
2020-10-19	Qatar	15	58721	10.9806	97.3064	4.57786	112.145	4.71979	0	0	643	6.4677	25660000	17.0604	2760385	14.8309	1	1	1.80914e+06	14.4084	0	0	0	1	0	154	27595	6796	907	18	0	0	67.2232	64.81	1	0	0	0	0	0	0	0	0	0	1	0	0	0	0
2020-10-20	Singapore	16	50635	10.8324	97.3064	4.57786	114.075	4.73686	435015	12.9831	557281	13.2308	25660000	17.0604	5685807	15.5535	1	1	2.54598e+06	14.75	0	0	0	1	0	144	27595	250	907	1	0	0	67.2232	50.93	1	0	0	0	0	0	0	0	0	0	1	0	0	0	0
2020-10-21	Solomon Islands	17	816	6.70564	97.3064	4.57786	133.218	4.89199	17865	9.79065	228	5.43372	25660000	17.0604	691191	13.4462	1	0	3.10584e+06	14.9488	0	1	1	1	0	140	27595	8	907	0	0	0	67.2232	28.0774	1	0	0	0	0	0	0	0	0	0	1	0	0	0	0
2020-10-22	South Africa	18	0	0	97.3064	4.57786	165.899	5.11138	495482	13.1133	3643828	15.1085	25660000	17.0604	58801927	17.8897	1	1	2.18742e+06	14.5982	0	0	0	1	0	140	27595	51113	907	2542	0	0	67.2232	57.6455	1	0	0	0	0	0	0	0	0	0	1	0	0	0	0
2020-10-23	Sri Lanka	19	4114	8.32239	97.3064	4.57786	166.94	5.11764	19781	9.89253	5064954	15.4379	25660000	17.0604	21919000	16.9029	1	0	2.21538e+06	14.6109	0	1	1	1	0	141	27595	7283	907	7	0	0	67.2232	33.3039	1	0	0	0	0	0	0	0	0	0	1	0	0	0	0
2020-10-24	Taiwan	20	13800	9.5325	97.3064	4.57786	185.809	5.22472	0	0	0	0	25660000	17.0604	23726185	16.9821	1	0	2.49793e+06	14.731	0	1	1	1	0	18	27595	41	907	0	0	0	67.2232	23.15	1	0	0	0	0	0	0	0	0	0	1	0	0	0	0
2020-10-25	Thailand	21	2568	7.85127	97.3064	4.57786	112.805	4.72566	470496	13.0615	1723805	14.36	25660000	17.0604	71475664	18.0849	0	1	2.38719e+06	14.6856	0	0	0	1	0	140	27595	216	907	0	0	0	67.2232	45.6968	1	0	0	0	0	0	0	0	0	0	1	0	0	0	0
2020-10-26	Tonga	22	0	0	97.3064	4.57786	127.78	4.85031	0	0	20356	9.92118	25660000	17.0604	105254	11.5641	1	0	3.29898e+06	15.0091	0	1	1	1	0	140	27595	0	907	0	0	0	67.2232	0	1	0	0	0	0	0	0	0	0	0	1	0	0	0	0
2020-10-27	UK	23	0	0	97.3064	4.57786	121.176	4.79725	5621960	15.5422	124148286	18.637	25660000	17.0604	9287289	16.0442	1	1	1.83975e+06	14.4251	0	0	1	1	0	154	27595	558396	907	5433	0	0	67.2232	67.8913	1	0	0	0	0	0	0	0	0	0	1	0	0	0	0
2020-10-28	United Arab Emirates	24	49374	10.8072	97.3064	4.57786	111.367	4.71283	0	0	37825	10.5408	25660000	17.0604	67081000	18.0214	1	1	1.69913e+06	14.3456	0	1	0	1	0	140	27595	38439	907	76	0	0	67.2232	66.2	1	0	0	0	0	0	0	0	0	0	1	0	0	0	0
2020-10-29	USA	25	34624	10.4523	97.3064	4.57786	119.414	4.78259	3880360	15.1714	6860043	15.7412	25660000	17.0604	331501080	19.6191	1	1	2.35545e+06	14.6722	0	0	0	1	0	156	27595	1929404	907	24553	0	0	67.2232	66.2	1	0	0	0	0	0	0	0	0	0	1	0	0	0	0
2020-10-31	Vietnam	26	3574	8.18172	97.3064	4.57786	168.988	5.12983	8537	9.05228	17626894	16.6849	25660000	17.0604	96648685	18.3866	1	1	2.43923e+06	14.7072	0	0	0	1	0	179	27595	86	907	0	0	0	67.2232	58.33	1	0	0	0	0	0	0	0	0	0	1	0	0	0	0
2020-11-01	Brunei	1	1524	7.32975	98.7354	4.59244	101.511	4.62016	38896	10.5687	3214	8.07558	25660000	17.0604	441725	12.9984	1	1	2.6268e+06	14.7813	0	0	0	1	0	144	27912	2	908	0	0	0	63.9183	35.19	1	0	0	0	0	0	0	0	0	0	0	1	0	1	0
2020-11-02	Canada	2	0	0	98.7354	4.59244	118.231	4.77264	1029485	13.8446	1456033	14.1912	25660000	17.0604	38037204	17.4541	1	1	2.24219e+06	14.623	0	0	0	1	0	176	27912	145624	908	1997	0	0	63.9183	69.971	1	0	0	0	0	0	0	0	0	0	0	1	0	0	1
2020-11-03	Chile	3	0	0	98.7354	4.59244	137.235	4.92169	51472	10.8488	431707	12.9755	25660000	17.0604	19300315	16.7756	1	1	2.72558e+06	14.8182	0	0	0	1	0	163	27912	41487	908	1203	0	0	63.9183	81.016	1	0	0	0	0	0	0	0	0	0	0	1	0	0	0
2020-11-04	China	4	18598	9.83086	98.7354	4.59244	127.219	4.84591	553284	13.2236	120788559	18.6096	25660000	17.0604	1411100000	21.0676	1	1	2.36518e+06	14.6764	0	0	0	1	0	18	27912	1101	908	0	0	0	63.9183	69.477	1	0	0	0	0	0	0	0	0	0	0	1	0	0	0
2020-11-06	Fiji	5	1736	7.45991	98.7354	4.59244	126.473	4.84003	89285	11.3996	368553	12.8173	25660000	17.0604	920422	13.7326	1	0	3.25977e+06	14.9972	0	1	1	1	0	140	27912	8	908	0	0	0	63.9183	49.07	1	0	0	0	0	0	0	0	0	0	0	1	0	0	0
2020-11-07	Hong Kong (SAR)	6	27570	10.2245	98.7354	4.59244	135.571	4.9095	384500	12.8597	2143924	14.5781	25660000	17.0604	7481000	15.8279	1	1	2.4499e+06	14.7116	0	0	0	1	0	144	27912	991	908	4	0	0	63.9183	55.1243	1	0	0	0	0	0	0	0	0	0	0	1	0	0	0
2020-11-08	India	7	4096	8.31801	98.7354	4.59244	189.467	5.24422	27319	10.2154	183888416	19.0298	25660000	17.0604	1396387127	21.0572	1	1	2.08445e+06	14.55	0	0	0	1	0	141	27912	1278727	908	15510	0	0	63.9183	61.2667	1	0	0	0	0	0	0	0	0	0	0	1	0	0	0
2020-11-09	Indonesia	8	4308	8.36846	98.7354	4.59244	154.523	5.04034	462000	13.0433	8461633	15.9511	25660000	17.0604	271857970	19.4208	1	1	2.66431e+06	14.7955	0	0	0	1	0	142	27912	128795	908	3076	0	0	63.9183	59.726	1	0	0	0	0	0	0	0	0	0	0	1	0	0	0
2020-11-10	Japan	9	15714	9.66237	98.7354	4.59244	104.939	4.65338	556574	13.2296	1066091	13.8795	25660000	17.0604	126261000	18.6539	1	0	2.52658e+06	14.7424	0	1	1	1	0	3	27912	47501	908	382	0	0	63.9183	36.67	1	0	0	0	0	0	0	0	0	0	0	1	0	0	0
2020-11-11	Korea	10	2992	8.00403	98.7354	4.59244	115.882	4.75257	224087	12.3198	5161665	15.4568	25660000	17.0604	25867467	17.0685	0	1	2.44391e+06	14.7091	0	0	0	1	0	141	27912	8017	908	60	0	0	63.9183	78.5163	1	0	0	0	0	0	0	0	0	0	0	1	0	0	0
2020-11-12	Malaysia	11	4420	8.39412	98.7354	4.59244	119.98	4.78733	225545	12.3263	6783420	15.73	25660000	17.0604	33199993	17.3181	1	1	2.52051e+06	14.74	0	0	0	1	0	144	27912	34149	908	97	0	0	63.9183	78.5163	1	0	0	0	0	0	0	0	0	0	0	1	0	0	0
2020-11-13	Mauritius	12	0	0	98.7354	4.59244	133.236	4.89212	6038	8.70599	110807	11.6156	25660000	17.0604	1265740	14.0512	1	0	2.24274e+06	14.6232	0	1	1	1	0	176	27912	63	908	0	0	0	63.9183	16.67	1	0	0	0	0	0	0	0	0	0	0	1	0	0	0
2020-11-16	New Zealand	13	52078	10.8605	98.7354	4.59244	1	0	2785827	14.8401	10744858	16.1899	25660000	17.0604	5090200	15.4428	1	0	3.33103e+06	15.0188	0	1	1	1	0	179	27912	100	908	0	0	0	63.9183	22.22	1	0	0	0	0	0	0	0	0	0	0	1	0	0	0
2020-11-18	Philippines	14	618	6.42811	98.7354	4.59244	134.592	4.90225	171491	12.0523	32964362	17.3109	25660000	17.0604	112190977	18.5357	1	0	2.62019e+06	14.7788	0	1	1	1	0	140	27912	50901	908	1171	0	0	63.9183	71.2793	1	0	0	0	0	0	0	0	0	0	0	1	0	0	0
2020-11-19	Qatar	15	66104	11.099	98.7354	4.59244	111.702	4.71584	0	0	643	6.4677	25660000	17.0604	2760385	14.8309	1	1	1.80914e+06	14.4084	0	0	0	1	0	154	27912	6277	908	5	0	0	63.9183	66.9703	1	0	0	0	0	0	0	0	0	0	0	1	0	0	0
2020-11-20	Singapore	16	85821	11.36	98.7354	4.59244	114.526	4.7408	435015	12.9831	557281	13.2308	25660000	17.0604	5685807	15.5535	1	1	2.54598e+06	14.75	0	0	0	1	0	144	27912	203	908	1	0	0	63.9183	52.6277	1	0	0	0	0	0	0	0	0	0	0	1	0	0	0
2020-11-21	Solomon Islands	17	680	6.52356	98.7354	4.59244	133.471	4.89389	17865	9.79065	228	5.43372	25660000	17.0604	691191	13.4462	1	0	3.10584e+06	14.9488	0	1	1	1	0	140	27912	9	908	0	0	0	63.9183	43.026	1	0	0	0	0	0	0	0	0	0	0	1	0	0	0
2020-11-22	South Africa	18	0	0	98.7354	4.59244	165.899	5.11138	495482	13.1133	3643828	15.1085	25660000	17.0604	58801927	17.8897	1	1	2.18742e+06	14.5982	0	0	0	1	0	140	27912	64552	908	2259	0	0	63.9183	52.8403	1	0	0	0	0	0	0	0	0	0	0	1	0	0	0
2020-11-23	Sri Lanka	19	3522	8.16707	98.7354	4.59244	167.78	5.12266	19781	9.89253	5064954	15.4379	25660000	17.0604	21919000	16.9029	1	0	2.21538e+06	14.6109	0	1	1	1	0	141	27912	13324	908	98	0	0	63.9183	51.559	1	0	0	0	0	0	0	0	0	0	0	1	0	0	0
2020-11-24	Taiwan	20	6188	8.73053	98.7354	4.59244	185.809	5.22472	0	0	0	0	25660000	17.0604	23726185	16.9821	1	0	2.49793e+06	14.731	0	1	1	1	0	18	27912	120	908	0	0	0	63.9183	23.15	1	0	0	0	0	0	0	0	0	0	0	1	0	0	0
2020-11-25	Thailand	21	3318	8.10742	98.7354	4.59244	112.761	4.72527	470496	13.0615	1723805	14.36	25660000	17.0604	71475664	18.0849	0	1	2.38719e+06	14.6856	0	0	0	1	0	140	27912	218	908	1	0	0	63.9183	48.054	1	0	0	0	0	0	0	0	0	0	0	1	0	0	0
2020-11-26	Tonga	22	0	0	98.7354	4.59244	128.295	4.85433	0	0	20356	9.92118	25660000	17.0604	105254	11.5641	1	0	3.29898e+06	15.0091	0	1	1	1	0	140	27912	0	908	0	0	0	63.9183	0	1	0	0	0	0	0	0	0	0	0	0	1	0	0	0
2020-11-27	UK	23	0	0	98.7354	4.59244	121.065	4.79633	5621960	15.5422	124148286	18.637	25660000	17.0604	9287289	16.0442	1	1	1.83975e+06	14.4251	0	0	1	1	0	154	27912	617997	908	13444	0	0	63.9183	68.3307	1	0	0	0	0	0	0	0	0	0	0	1	0	0	0
2020-11-28	United Arab Emirates	24	44362	10.7002	98.7354	4.59244	111.241	4.7117	0	0	37825	10.5408	25660000	17.0604	67081000	18.0214	1	1	1.69913e+06	14.3456	0	1	0	1	0	140	27912	36231	908	77	0	0	63.9183	71.4787	1	0	0	0	0	0	0	0	0	0	0	1	0	0	0
2020-11-29	USA	25	42180	10.6497	98.7354	4.59244	119.341	4.78198	3880360	15.1714	6860043	15.7412	25660000	17.0604	331501080	19.6191	1	1	2.35545e+06	14.6722	0	0	0	1	0	156	27912	4491968	908	39960	0	0	63.9183	71.4787	1	0	0	0	0	0	0	0	0	0	0	1	0	0	0
2020-11-30	Vietnam	26	4120	8.32385	98.7354	4.59244	168.974	5.12974	8537	9.05228	17626894	16.6849	25660000	17.0604	96648685	18.3866	1	1	2.43923e+06	14.7072	0	0	0	1	0	179	27912	167	908	0	0	0	63.9183	46.1107	1	0	0	0	0	0	0	0	0	0	0	1	0	0	0
2020-12-02	Brunei	1	3302	8.10259	98.9386	4.5945	101.423	4.6193	38896	10.5687	3214	8.07558	25660000	17.0604	441725	12.9984	1	1	2.6268e+06	14.7813	0	0	0	1	0	144	28425	7	909	0	0	0	65.9932	35.19	1	0	0	0	0	0	0	0	0	0	0	0	1	1	0
2020-12-03	Canada	2	0	0	98.9386	4.5945	117.974	4.77046	1029485	13.8446	1456033	14.1912	25660000	17.0604	38037204	17.4541	1	1	2.24219e+06	14.623	0	0	0	1	0	176	28425	206781	909	3513	0	0	65.9932	72.69	1	0	0	0	0	0	0	0	0	0	0	0	1	0	1
2020-12-04	Chile	3	912	6.81674	98.9386	4.5945	137.699	4.92507	51472	10.8488	431707	12.9755	25660000	17.0604	19300315	16.7756	1	1	2.72558e+06	14.8182	0	0	0	1	0	163	28425	57230	909	1198	0	8228	65.9932	76.0313	1	0	0	0	0	0	0	0	0	0	0	0	1	0	0
2020-12-05	China	4	19704	9.88863	98.9386	4.5945	128.138	4.85311	553284	13.2236	120788559	18.6096	25660000	17.0604	1411100000	21.0676	1	1	2.36518e+06	14.6764	0	0	0	1	0	18	28425	794	909	0	0	0	65.9932	79.0755	1	0	0	0	0	0	0	0	0	0	0	0	1	0	0
2020-12-07	Fiji	5	3011	8.01036	98.9386	4.5945	126.702	4.84184	89285	11.3996	368553	12.8173	25660000	17.0604	920422	13.7326	1	0	3.25977e+06	14.9972	0	1	1	1	0	140	28425	7	909	0	0	0	65.9932	49.07	1	0	0	0	0	0	0	0	0	0	0	0	1	0	0
2020-12-08	Hong Kong (SAR)	6	44442	10.702	98.9386	4.5945	134.895	4.9045	384500	12.8597	2143924	14.5781	25660000	17.0604	7481000	15.8279	1	1	2.4499e+06	14.7116	0	0	0	1	0	144	28425	2532	909	39	0	0	65.9932	71.031	1	0	0	0	0	0	0	0	0	0	0	0	1	0	0
2020-12-09	India	7	4096	8.31801	98.9386	4.5945	187.56	5.2341	27319	10.2154	183888416	19.0298	25660000	17.0604	1396387127	21.0572	1	1	2.08445e+06	14.55	0	0	0	1	0	141	28425	823900	909	11373	0	0	65.9932	66.2	1	0	0	0	0	0	0	0	0	0	0	0	1	0	0
2020-12-10	Indonesia	8	7538	8.92784	98.9386	4.5945	155.213	5.0448	462000	13.0433	8461633	15.9511	25660000	17.0604	271857970	19.4208	1	1	2.66431e+06	14.7955	0	0	0	1	0	142	28425	204315	909	5193	0	0	65.9932	65.549	1	0	0	0	0	0	0	0	0	0	0	0	1	0	0
2020-12-11	Japan	9	15866	9.672	98.9386	4.5945	104.728	4.65137	556574	13.2296	1066091	13.8795	25660000	17.0604	126261000	18.6539	1	0	2.52658e+06	14.7424	0	1	1	1	0	3	28425	86925	909	1340	0	0	65.9932	42.9487	1	0	0	0	0	0	0	0	0	0	0	0	1	0	0
2020-12-12	Korea	10	3568	8.18004	98.9386	4.5945	116.159	4.75496	224087	12.3198	5161665	15.4568	25660000	17.0604	25867467	17.0685	0	1	2.44391e+06	14.7091	0	0	0	1	0	141	28425	27117	909	391	0	0	65.9932	69.6384	1	0	0	0	0	0	0	0	0	0	0	0	1	0	0
2020-12-13	Malaysia	11	4890	8.49515	98.9386	4.5945	120.58	4.79231	225545	12.3263	6783420	15.73	25660000	17.0604	33199993	17.3181	1	1	2.52051e+06	14.74	0	0	0	1	0	144	28425	47313	909	111	0	0	65.9932	69.6384	1	0	0	0	0	0	0	0	0	0	0	0	1	0	0
2020-12-14	Mauritius	12	0	0	98.9386	4.5945	132.985	4.89024	6038	8.70599	110807	11.6156	25660000	17.0604	1265740	14.0512	1	0	2.24274e+06	14.6232	0	1	1	1	0	176	28425	23	909	0	0	0	65.9932	16.67	1	0	0	0	0	0	0	0	0	0	0	0	1	0	0
2020-12-17	New Zealand	13	54876	10.9128	98.9386	4.5945	1	0	2785827	14.8401	10744858	16.1899	25660000	17.0604	5090200	15.4428	1	0	3.33103e+06	15.0188	0	1	1	1	0	179	28425	103	909	0	0	0	65.9932	22.22	1	0	0	0	0	0	0	0	0	0	0	0	1	0	0
2020-12-19	Philippines	14	3144	8.05357	98.9386	4.5945	135.731	4.91068	171491	12.0523	32964362	17.3109	25660000	17.0604	112190977	18.5357	1	0	2.62019e+06	14.7788	0	1	1	1	0	140	28425	42434	909	852	0	0	65.9932	66.8277	1	0	0	0	0	0	0	0	0	0	0	0	1	0	0
2020-12-20	Qatar	15	76243	11.2417	98.9386	4.5945	111.726	4.71605	0	0	643	6.4677	25660000	17.0604	2760385	14.8309	1	1	1.80914e+06	14.4084	0	0	0	1	0	154	28425	5001	909	8	0	0	65.9932	64.81	1	0	0	0	0	0	0	0	0	0	0	0	1	0	0
2020-12-21	Singapore	16	12204	9.4096	98.9386	4.5945	114.942	4.74443	435015	12.9831	557281	13.2308	25660000	17.0604	5685807	15.5535	1	1	2.54598e+06	14.75	0	0	0	1	0	144	28425	381	909	0	0	5	65.9932	50.93	1	0	0	0	0	0	0	0	0	0	0	0	1	0	0
2020-12-22	Solomon Islands	17	1224	7.1107	98.9386	4.5945	131.952	4.88244	17865	9.79065	228	5.43372	25660000	17.0604	691191	13.4462	1	0	3.10584e+06	14.9488	0	1	1	1	0	140	28425	0	909	0	0	0	65.9932	35.9306	1	0	0	0	0	0	0	0	0	0	0	0	1	0	0
2020-12-23	South Africa	18	0	0	98.9386	4.5945	166.075	5.11244	495482	13.1133	3643828	15.1085	25660000	17.0604	58801927	17.8897	1	1	2.18742e+06	14.5982	0	0	0	1	0	140	28425	267157	909	6934	0	0	65.9932	61.7829	1	0	0	0	0	0	0	0	0	0	0	0	1	0	0
2020-12-24	Sri Lanka	19	9962	9.20663	98.9386	4.5945	169.461	5.13262	19781	9.89253	5064954	15.4379	25660000	17.0604	21919000	16.9029	1	0	2.21538e+06	14.6109	0	1	1	1	0	141	28425	19312	909	86	0	0	65.9932	65.4871	1	0	0	0	0	0	0	0	0	0	0	0	1	0	0
2020-12-25	Taiwan	20	8564	9.05544	98.9386	4.5945	185.809	5.22472	0	0	0	0	25660000	17.0604	23726185	16.9821	1	0	2.49793e+06	14.731	0	1	1	1	0	18	28425	124	909	0	0	0	65.9932	19.44	1	0	0	0	0	0	0	0	0	0	0	0	1	0	0
2020-12-26	Thailand	21	2088	7.64444	98.9386	4.5945	112.926	4.72674	470496	13.0615	1723805	14.36	25660000	17.0604	71475664	18.0849	0	1	2.38719e+06	14.6856	0	0	0	1	0	140	28425	2886	909	1	0	0	65.9932	54.9287	1	0	0	0	0	0	0	0	0	0	0	0	1	0	0
2020-12-27	Tonga	22	0	0	98.9386	4.5945	129.839	4.8663	0	0	20356	9.92118	25660000	17.0604	105254	11.5641	1	0	3.29898e+06	15.0091	0	1	1	1	0	140	28425	0	909	0	0	0	65.9932	0	1	0	0	0	0	0	0	0	0	0	0	0	1	0	0
2020-12-28	UK	23	0	0	98.9386	4.5945	121.398	4.79908	5621960	15.5422	124148286	18.637	25660000	17.0604	9287289	16.0442	1	1	1.83975e+06	14.4251	0	0	1	1	0	154	28425	859123	909	17336	0	0	65.9932	72.3561	1	0	0	0	0	0	0	0	0	0	0	0	1	0	0
2020-12-29	United Arab Emirates	24	58726	10.9807	98.9386	4.5945	111.339	4.71258	0	0	37825	10.5408	25660000	17.0604	67081000	18.0214	1	1	1.69913e+06	14.3456	0	1	0	1	0	140	28425	38962	909	97	0	0	65.9932	71.8794	1	0	0	0	0	0	0	0	0	0	0	0	1	0	0
2020-12-30	USA	25	53427	10.8861	98.9386	4.5945	119.453	4.78292	3880360	15.1714	6860043	15.7412	25660000	17.0604	331501080	19.6191	1	1	2.35545e+06	14.6722	0	0	0	1	0	156	28425	6552551	909	80095	0	5641256	65.9932	71.8794	1	0	0	0	0	0	0	0	0	0	0	0	1	0	0
2020-12-31	Vietnam	26	5304	8.57641	98.9386	4.5945	169.147	5.13077	8537	9.05228	17626894	16.6849	25660000	17.0604	96648685	18.3866	1	1	2.43923e+06	14.7072	0	0	0	1	0	179	28425	118	909	0	0	0	65.9932	54.8681	1	0	0	0	0	0	0	0	0	0	0	0	1	0	0
2021-01-01	Brunei	1	3810	8.24565	99.0455	4.59558	101.898	4.62398	559	6.32794	3070	8.02976	25690000	17.0616	445373	13.0067	1	1	2.6268e+06	14.7813	0	0	0	1	0	144	28818	23	909	0	0	0	60.6752	35.19	1	1	0	0	0	0	0	0	0	0	0	0	0	1	0
2021-01-02	Canada	2	0	0	99.0455	4.59558	118.661	4.77627	22731	10.0315	56410	10.9404	25690000	17.0616	38246108	17.4596	1	1	2.24219e+06	14.623	0	0	0	1	0	176	28818	192663	909	4297	0	877220	60.6752	75.0132	1	1	0	0	0	0	0	0	0	0	0	0	0	0	1
2021-01-03	Chile	3	303	5.71703	99.0455	4.59558	138.667	4.93208		0	34940	10.4614	25690000	17.0616	19493184	16.7856	1	1	2.72558e+06	14.8182	0	0	0	1	0	163	28818	118136	909	1844	0	44887	60.6752	79.17	1	1	0	0	0	0	0	0	0	0	0	0	0	0	0
2021-01-04	China	4	19052	9.85498	99.0455	4.59558	129.345	4.86248	4052	8.30721	705080	13.4661	25690000	17.0616	1412360000	21.0685	1	1	2.36518e+06	14.6764	0	0	0	1	0	18	28818	3649	909	2	0	0	60.6752	78.24	1	1	0	0	0	0	0	0	0	0	0	0	0	0	0
2021-01-06	Fiji	5	4964	8.51017	99.0455	4.59558	128.883	4.8589	1941	7.57147	79830	11.2877	25690000	17.0616	924610	13.7371	1	0	3.25977e+06	14.9972	0	1	1	1	0	140	28818	6	909	0	0	0	60.6752	49.07	1	1	0	0	0	0	0	0	0	0	0	0	0	0	0
2021-01-07	Hong Kong (SAR)	6	48244	10.784	99.0455	4.59558	136.652	4.91744	9486	9.15768	104760	11.5594	25690000	17.0616	7413100	15.8188	1	1	2.4499e+06	14.7116	0	0	0	1	0	144	28818	1606	909	33	0	0	60.6752	71.3	1	1	0	0	0	0	0	0	0	0	0	0	0	0	0
2021-01-08	India	7	3072	8.03041	99.0455	4.59558	186.367	5.22772	3833	8.25166	721050	13.4885	25690000	17.0616	1407563842	21.0651	1	1	2.08445e+06	14.55	0	0	0	1	0	141	28818	470901	909	5398	0	3758843	60.6752	65.4832	1	1	0	0	0	0	0	0	0	0	0	0	0	0	0
2021-01-09	Indonesia	8	8255	9.0187	99.0455	4.59558	155.609	5.04735	11400	9.34146	92400	11.4339	25690000	17.0616	273753191	19.4277	1	1	2.66431e+06	14.7955	0	0	0	1	0	142	28818	335116	909	7860	0	366439	60.6752	68.06	1	1	0	0	0	0	0	0	0	0	0	0	0	0	0
2021-01-10	Japan	9	14064	9.55144	99.0455	4.59558	105.256	4.65639	11572	9.35643	47020	10.7583	25690000	17.0616	125681593	18.6493	1	0	2.52658e+06	14.7424	0	1	1	1	0	3	28818	154991	909	2261	0	0	60.6752	49.3606	1	1	0	0	0	0	0	0	0	0	0	0	0	0	0
2021-01-11	Korea	10	4148	8.33062	99.0455	4.59558	116.981	4.76202	5604	8.63141	111530	11.6221	25690000	17.0616	25971909	17.0725	0	1	2.44391e+06	14.7091	0	0	0	1	0	141	28818	16739	909	508	0	0	60.6752	73.3694	1	1	0	0	0	0	0	0	0	0	0	0	0	0	0
2021-01-12	Malaysia	11	7030	8.85808	99.0455	4.59558	122.08	4.80467	6157	8.72551	177460	12.0865	25690000	17.0616	33573874	17.3293	1	1	2.52051e+06	14.74	0	0	0	1	0	144	28818	101949	909	289	0	0	60.6752	73.3694	1	1	0	0	0	0	0	0	0	0	0	0	0	0	0
2021-01-13	Mauritius	12	0	0	99.0455	4.59558	134.113	4.89868		0	30150	10.314	25690000	17.0616	1266060	14.0514	1	0	2.24274e+06	14.6232	0	1	1	1	0	176	28818	41	909	0	0	0	60.6752	19.0826	1	1	0	0	0	0	0	0	0	0	0	0	0	0	0
2021-01-16	New Zealand	13	35155	10.4676	99.0455	4.59558	1	0	85769	11.3594	574470	13.2612	25690000	17.0616	5122600	15.4492	1	0	3.33103e+06	15.0188	0	1	1	1	0	179	28818	144	909	1	0	0	60.6752	22.22	1	1	0	0	0	0	0	0	0	0	0	0	0	0	0
2021-01-18	Philippines	14	1176	7.07072	99.0455	4.59558	137.251	4.92181	4249	8.35467	310050	12.6445	25690000	17.0616	113880328	18.5507	1	0	2.62019e+06	14.7788	0	1	1	1	0	140	28818	51554	909	1505	0	0	60.6752	71.5806	1	1	0	0	0	0	0	0	0	0	0	0	0	0	0
2021-01-19	Qatar	15	79447	11.2829	99.0455	4.59558	113.1	4.72827		0	2010	7.60639	25690000	17.0616	2688235	14.8044	1	1	1.80914e+06	14.4084	0	0	0	1	0	154	28818	7501	909	3	0	0	60.6752	64.81	1	1	0	0	0	0	0	0	0	0	0	0	0	0	0
2021-01-20	Singapore	16	118388	11.6817	99.0455	4.59558	114.909	4.74414	10148	9.22513	60390	11.0086	25690000	17.0616	5453566	15.5118	1	1	2.54598e+06	14.75	0	0	0	1	0	144	28818	937	909	0	0	152631	60.6752	50.93	1	1	0	0	0	0	0	0	0	0	0	0	0	0	0
2021-01-21	Solomon Islands	17	1224	7.1107	99.0455	4.59558	135.118	4.90615	271	5.6058	2800	7.93773	25690000	17.0616	707851	13.47	1	0	3.10584e+06	14.9488	0	1	1	1	0	140	28818	0	909	0	0		60.6752	33.33	1	1	0	0	0	0	0	0	0	0	0	0	0	0	0
2021-01-22	South Africa	18	0	0	99.0455	4.59558	166.779	5.11667	5771	8.66077	200240	12.2073	25690000	17.0616	59392255	17.8997	1	1	2.18742e+06	14.5982	0	0	0	1	0	140	28818	396600	909	15695	0	0	60.6752	63.8452	1	1	0	0	0	0	0	0	0	0	0	0	0	0	0
2021-01-23	Sri Lanka	19	10494	9.25865	99.0455	4.59558	170.541	5.13897	474	6.16331	146950	11.8979	25690000	17.0616	22156000	16.9136	1	0	2.21538e+06	14.6109	0	1	1	1	0	141	28818	20858	909	112	0	59154	60.6752	79.7635	1	1	0	0	0	0	0	0	0	0	0	0	0	0	0
2021-01-24	Taiwan	20	5511	8.61468	99.0455	4.59558	186.692	5.22946		0	5090	8.53523	25690000	17.0616	23665024	16.9795	1	0	2.49793e+06	14.731	0	1	1	1	0	18	28818	112	909	1	0	0	60.6752	21.4129	1	1	0	0	0	0	0	0	0	0	0	0	0	0	0
2021-01-25	Thailand	21	1713	7.44659	99.0455	4.59558	113.03	4.72766	1470	7.2937	83450	11.332	25690000	17.0616	71601103	18.0866	0	1	2.38719e+06	14.6856	0	0	0	1	0	140	28818	11898	909	16	0	0	60.6752	59.3197	1	1	0	0	0	0	0	0	0	0	0	0	0	0	0
2021-01-26	Tonga	22	0	0	99.0455	4.59558	130.74	4.87321		0	15450	9.64543	25690000	17.0616	106017	11.5714	1	0	3.29898e+06	15.0091	0	1	1	1	0	140	28818	0	909	0	0	0	60.6752	0	1	1	0	0	0	0	0	0	0	0	0	0	0	0	0
2021-01-27	UK	23	0	0	99.0455	4.59558	121.287	4.79816	155078	11.9517	1172490	13.9746	25690000	17.0616	9365145	16.0525	1	1	1.83975e+06	14.4251	0	0	1	1	0	154	28818	1328396	909	36570	0	7112605	60.6752	86.8852	1	1	0	0	0	0	0	0	0	0	0	0	0	0	0
2021-01-28	United Arab Emirates	24	53872	10.8944	99.0455	4.59558	111.511	4.71412		0	13550	9.51422	25690000	17.0616	67326569	18.0251	1	1	1.69913e+06	14.3456	0	1	0	1	0	140	28818	95787	909	181	0	2446465	60.6752	71.76	1	1	0	0	0	0	0	0	0	0	0	0	0	0	0
2021-01-29	USA	25	48901	10.7976	99.0455	4.59558	119.961	4.78717	96235	11.4746	110160	11.6097	25690000	17.0616	331893745	19.6203	1	1	2.35545e+06	14.6722	0	0	0	1	0	156	28818	6137649	909	95976	0	32239862	60.6752	71.76	1	1	0	0	0	0	0	0	0	0	0	0	0	0	0
2021-01-31	Vietnam	26	1463	7.28893	99.0455	4.59558	169.253	5.13139	37	3.63759	270340	12.5074	25690000	17.0616	97468029	18.395	1	1	2.43923e+06	14.7072	0	0	0	1	0	179	28818	352	909	0	0	0	60.6752	58.6303	1	1	0	0	0	0	0	0	0	0	0	0	0	0	0
2021-02-01	Brunei	1	2032	7.61727	99.1542	4.59668	102.373	4.62862	559	6.32794	3070	8.02976	25690000	17.0616	445373	13.0067	1	1	2.6268e+06	14.7813	0	0	0	1	0	144	28978	6	909	0	34630	0	62.4664	35.19	1	0	1	0	0	0	0	0	0	0	0	0	0	1	0
2021-02-02	Canada	2	0	0	99.1542	4.59668	119.262	4.78132	22731	10.0315	56410	10.9404	25690000	17.0616	38246108	17.4596	1	1	2.24219e+06	14.623	0	0	0	1	0	176	28978	87110	909	1962	34630	946383	62.4664	75.46	1	0	1	0	0	0	0	0	0	0	0	0	0	0	1
2021-02-03	Chile	3	623	6.43615	99.1542	4.59668	138.925	4.93393		0	34940	10.4614	25690000	17.0616	19493184	16.7856	1	1	2.72558e+06	14.8182	0	0	0	1	0	163	28978	97516	909	2120	34630	3305719	62.4664	79.17	1	0	1	0	0	0	0	0	0	0	0	0	0	0	0
2021-02-04	China	4	16492	9.71069	99.1542	4.59668	130.114	4.86841	4052	8.30721	705080	13.4661	25690000	17.0616	1412360000	21.0685	1	1	2.36518e+06	14.6764	0	0	0	1	0	18	28978	616	909	0	34630	0	62.4664	74.0725	1	0	1	0	0	0	0	0	0	0	0	0	0	0	0
2021-02-06	Fiji	5	2956	7.99193	99.1542	4.59668	131.523	4.87918	1941	7.57147	79830	11.2877	25690000	17.0616	924610	13.7371	1	0	3.25977e+06	14.9972	0	1	1	1	0	140	28978	4	909	0	34630	0	62.4664	49.07	1	0	1	0	0	0	0	0	0	0	0	0	0	0	0
2021-02-07	Hong Kong (SAR)	6	32364	10.3848	99.1542	4.59668	137.058	4.9204	9486	9.15768	104760	11.5594	25690000	17.0616	7413100	15.8188	1	1	2.4499e+06	14.7116	0	0	0	1	0	144	28978	553	909	18	34630	14587	62.4664	71.3	1	0	1	0	0	0	0	0	0	0	0	0	0	0	0
2021-02-08	India	7	2304	7.74284	99.1542	4.59668	186.725	5.22964	3833	8.25166	721050	13.4885	25690000	17.0616	1407563842	21.0651	1	1	2.08445e+06	14.55	0	0	0	1	0	141	28978	354631	909	2765	34630	10078106	62.4664	61.9021	1	0	1	0	0	0	0	0	0	0	0	0	0	0	0
2021-02-09	Indonesia	8	8966	9.10131	99.1542	4.59668	155.771	5.04839	11400	9.34146	92400	11.4339	25690000	17.0616	273753191	19.4277	1	1	2.66431e+06	14.7955	0	0	0	1	0	142	28978	256320	909	6168	34630	1789566	62.4664	68.06	1	0	1	0	0	0	0	0	0	0	0	0	0	0	0
2021-02-10	Japan	9	12282	9.41597	99.1542	4.59668	105.256	4.65639	11572	9.35643	47020	10.7583	25690000	17.0616	125681593	18.6493	1	0	2.52658e+06	14.7424	0	1	1	1	0	3	28978	41896	909	2144	34630	15556	62.4664	49.6393	1	0	1	0	0	0	0	0	0	0	0	0	0	0	0
2021-02-11	Korea	10	3536	8.17103	99.1542	4.59668	117.607	4.76735	5604	8.63141	111530	11.6221	25690000	17.0616	25971909	17.0725	0	1	2.44391e+06	14.7091	0	0	0	1	0	141	28978	11523	909	180	34630	3090	62.4664	77.31	1	0	1	0	0	0	0	0	0	0	0	0	0	0	0
2021-02-12	Malaysia	11	5553	8.62227	99.1542	4.59668	122.48	4.80794	6157	8.72551	177460	12.0865	25690000	17.0616	33573874	17.3293	1	1	2.52051e+06	14.74	0	0	0	1	0	144	28978	85793	909	375	34630	18710	62.4664	77.31	1	0	1	0	0	0	0	0	0	0	0	0	0	0	0
2021-02-13	Mauritius	12	0	0	99.1542	4.59668	135.241	4.90706		0	30150	10.314	25690000	17.0616	1266060	14.0514	1	0	2.24274e+06	14.6232	0	1	1	1	0	176	28978	42	909	0	34630	0	62.4664	19.44	1	0	1	0	0	0	0	0	0	0	0	0	0	0	0
2021-02-16	New Zealand	13	24201	10.0942	99.1542	4.59668	1	0	85769	11.3594	574470	13.2612	25690000	17.0616	5122600	15.4492	1	0	3.33103e+06	15.0188	0	1	1	1	0	179	28978	74	909	1	34630	6682	62.4664	33.4139	1	0	1	0	0	0	0	0	0	0	0	0	0	0	0
2021-02-18	Philippines	14	840	6.73459	99.1542	4.59668	137.377	4.92273	4249	8.35467	310050	12.6445	25690000	17.0616	113880328	18.5507	1	0	2.62019e+06	14.7788	0	1	1	1	0	140	28978	50734	909	1569	34630	0	62.4664	80.2089	1	0	1	0	0	0	0	0	0	0	0	0	0	0	0
2021-02-19	Qatar	15	66286	11.1017	99.1542	4.59668	112.995	4.72735		0	2010	7.60639	25690000	17.0616	2688235	14.8044	1	1	1.80914e+06	14.4084	0	0	0	1	0	154	28978	12329	909	10	34630	0	62.4664	77.6811	1	0	1	0	0	0	0	0	0	0	0	0	0	0	0
2021-02-20	Singapore	16	106548	11.5764	99.1542	4.59668	115.567	4.74985	10148	9.22513	60390	11.0086	25690000	17.0616	5453566	15.5118	1	1	2.54598e+06	14.75	0	0	0	1	0	144	28978	400	909	0	34630	322629	62.4664	56.3868	1	0	1	0	0	0	0	0	0	0	0	0	0	0	0
2021-02-21	Solomon Islands	17	1360	7.21598	99.1542	4.59668	140.056	4.94204	271	5.6058	2800	7.93773	25690000	17.0616	707851	13.47	1	0	3.10584e+06	14.9488	0	1	1	1	0	140	28978	1	909	0	34630	0	62.4664	33.33	1	0	1	0	0	0	0	0	0	0	0	0	0	0	0
2021-02-22	South Africa	18	0	0	99.1542	4.59668	167.835	5.12298	5771	8.66077	200240	12.2073	25690000	17.0616	59392255	17.8997	1	1	2.18742e+06	14.5982	0	0	0	1	0	140	28978	59632	909	5829	34630	68267	62.4664	63.89	1	0	1	0	0	0	0	0	0	0	0	0	0	0	0
2021-02-23	Sri Lanka	19	10784	9.28591	99.1542	4.59668	171.381	5.14389	474	6.16331	146950	11.8979	25690000	17.0616	22156000	16.9136	1	0	2.21538e+06	14.6109	0	1	1	1	0	141	28978	18937	909	148	34630	394032	62.4664	79.17	1	0	1	0	0	0	0	0	0	0	0	0	0	0	0
2021-02-24	Taiwan	20	4284	8.36288	99.1542	4.59668	186692	12.1372		0	5090	8.53523	25690000	17.0616	23665024	16.9795	1	0	2.49793e+06	14.731	0	1	1	1	0	18	28978	44	909	1	34630	0	62.4664	25	1	0	1	0	0	0	0	0	0	0	0	0	0	0	0
2021-02-25	Thailand	21	696	6.54679	99.1542	4.59668	112	4.7185	1470	7.2937	83450	11.332	25690000	17.0616	71601103	18.0866	0	1	2.38719e+06	14.6856	0	0	0	1	0	140	28978	7169	909	6	34630	0	62.4664	49.3064	1	0	1	0	0	0	0	0	0	0	0	0	0	0	0
2021-02-26	Tonga	22	0	0	99.1542	4.59668	132.284	4.88495		0	15450	9.64543	25690000	17.0616	106017	11.5714	1	0	3.29898e+06	15.0091	0	1	1	1	0	140	28978	0	909	0	34630	0	62.4664	0	1	0	1	0	0	0	0	0	0	0	0	0	0	0	0
2021-02-27	UK	23	0	0	99.1542	4.59668	111.048	4.70997	155078	11.9517	1172490	13.9746	25690000	17.0616	9365145	16.0525	1	1	1.83975e+06	14.4251	0	0	1	1	0	154	28978	359378	909	16814	34630	11300691	62.4664	87.4975	1	0	1	0	0	0	0	0	0	0	0	0	0	0	0
2021-02-28	United Arab Emirates	24	48639	10.7922	99.1542	4.59668	121.398	4.79908		0	13550	9.51422	25690000	17.0616	67326569	18.0251	1	1	1.69913e+06	14.3456	0	1	0	1	0	140	28978	87915	909	371	34630	2686299	62.4664	68.3243	1	0	1	0	0	0	0	0	0	0	0	0	0	0	0
2021-02-28	USA	25	43914	10.69	99.1542	4.59668	120.618	4.79263	96235	11.4746	110160	11.6097	25690000	17.0616	331893745	19.6203	1	1	2.35545e+06	14.6722	0	0	0	1	0	156	28978	2407640	909	65189	34630	50085699	62.4664	68.3243	1	0	1	0	0	0	0	0	0	0	0	0	0	0	0
2021-02-28	Vietnam	26	274	5.61677	99.1542	4.59668	171.822	5.14646	37	3.63759	270340	12.5074	25690000	17.0616	97468029	18.395	1	1	2.43923e+06	14.7072	0	0	0	1	0	179	28978	631	909	0	34630	0	62.4664	70.9293	1	0	1	0	0	0	0	0	0	0	0	0	0	0	0
2021-03-01	Brunei	1	1524	7.32975	99.1952	4.59709	102.695	4.63176	559	6.32794	3070	8.02976	25690000	17.0616	445373	13.0067	1	1	2.6268e+06	14.7813	0	0	0	1	0	144	29322	26	909	0	744330	0	50.91	40.74	1	0	0	1	0	0	0	0	0	0	0	0	0	1	0
2021-03-02	Canada	2	0	0	99.1952	4.59709	119.863	4.78635	22731	10.0315	56410	10.9404	25690000	17.0616	38246108	17.4596	1	1	2.24219e+06	14.623	0	0	0	1	0	176	29322	120640	909	965	744330	3859138	50.91	73.1923	1	0	0	1	0	0	0	0	0	0	0	0	0	0	1
2021-03-03	Chile	3	0	0	99.1952	4.59709	139.441	4.93764		0	34940	10.4614	25690000	17.0616	19493184	16.7856	1	1	2.72558e+06	14.8182	0	0	0	1	0	163	29322	170913	909	2563	744330	7129166	50.91	79.17	1	0	0	1	0	0	0	0	0	0	0	0	0	0	0
2021-03-04	China	4	16900	9.73513	99.1952	4.59709	129.473	4.86347	4052	8.30721	705080	13.4661	25690000	17.0616	1412360000	21.0685	1	1	2.36518e+06	14.6764	0	0	0	1	0	18	29322	650	909	0	744330	39358000	50.91	52.9877	1	0	0	1	0	0	0	0	0	0	0	0	0	0	0
2021-03-06	Fiji	5	3616	8.1934	99.1952	4.59709	128.08	4.85265	1941	7.57147	79830	11.2877	25690000	17.0616	924610	13.7371	1	0	3.25977e+06	14.9972	0	1	1	1	0	140	29322	8	909	0	744330	0	50.91	49.07	1	0	0	1	0	0	0	0	0	0	0	0	0	0	0
2021-03-07	Hong Kong (SAR)	6	4676	8.45041	99.1952	4.59709	137.193	4.92139	9486	9.15768	104760	11.5594	25690000	17.0616	7413100	15.8188	1	1	2.4499e+06	14.7116	0	0	0	1	0	144	29322	462	909	6	744330	484399	50.91	71.3	1	0	0	1	0	0	0	0	0	0	0	0	0	0	0
2021-03-08	India	7	2560	7.84815	99.1952	4.59709	186.963	5.23091	3833	8.25166	721050	13.4885	25690000	17.0616	1407563842	21.0651	1	1	2.08445e+06	14.55	0	0	0	1	0	141	29322	1109424	909	5770	744330	50816630	50.91	59.3048	1	0	0	1	0	0	0	0	0	0	0	0	0	0	0
2021-03-09	Indonesia	8	8530	9.05146	99.1952	4.59709	155.903	5.04924	11400	9.34146	92400	11.4339	25690000	17.0616	273753191	19.4277	1	1	2.66431e+06	14.7955	0	0	0	1	0	142	29322	177078	909	4692	744330	7330741	50.91	71.76	1	0	0	1	0	0	0	0	0	0	0	0	0	0	0
2021-03-10	Japan	9	14790	9.60177	99.1952	4.59709	105.361	4.65739	11572	9.35643	47020	10.7583	25690000	17.0616	125681593	18.6493	1	0	2.52658e+06	14.7424	0	1	1	1	0	3	29322	42450	909	1279	744330	745238	50.91	44.1145	1	0	0	1	0	0	0	0	0	0	0	0	0	0	0
2021-03-11	Korea	10	3536	8.17103	99.1952	4.59709	117.908	4.7699	5604	8.63141	111530	11.6221	25690000	17.0616	25971909	17.0725	0	1	2.44391e+06	14.7091	0	0	0	1	0	141	29322	13608	909	130	744330	899174	50.91	70.7455	1	0	0	1	0	0	0	0	0	0	0	0	0	0	0
2021-03-12	Malaysia	11	6960	8.84808	99.1952	4.59709	122.88	4.8112	6157	8.72551	177460	12.0865	25690000	17.0616	33573874	17.3293	1	1	2.52051e+06	14.74	0	0	0	1	0	144	29322	44748	909	137	744330	688741	50.91	70.7455	1	0	0	1	0	0	0	0	0	0	0	0	0	0	0
2021-03-13	Mauritius	12	0	0	99.1952	4.59709	135.993	4.9126		0	30150	10.314	25690000	17.0616	1266060	14.0514	1	0	2.24274e+06	14.6232	0	1	1	1	0	176	29322	353	909	0	744330	0	50.91	71.4768	1	0	0	1	0	0	0	0	0	0	0	0	0	0	0
2021-03-16	New Zealand	13	29641	10.2969	99.1952	4.59709	1	0	85769	11.3594	574470	13.2612	25690000	17.0616	5122600	15.4492	1	0	3.33103e+06	15.0188	0	1	1	1	0	179	29322	123	909	0	744330	67031	50.91	32.3306	1	0	0	1	0	0	0	0	0	0	0	0	0	0	0
2021-03-18	Philippines	14	840	6.73459	99.1952	4.59709	136.997	4.91996	4249	8.35467	310050	12.6445	25690000	17.0616	113880328	18.5507	1	0	2.62019e+06	14.7788	0	1	1	1	0	140	29322	170936	909	979	744330	145741	50.91	74.4745	1	0	0	1	0	0	0	0	0	0	0	0	0	0	0
2021-03-19	Qatar	15	58740	10.9809	99.1952	4.59709	113.182	4.72899		0	2010	7.60639	25690000	17.0616	2688235	14.8044	1	1	1.80914e+06	14.4084	0	0	0	1	0	154	29322	16300	909	33	744330	0	50.91	71.3	1	0	0	1	0	0	0	0	0	0	0	0	0	0	0
2021-03-20	Singapore	16	92320	11.433	99.1952	4.59709	115.823	4.75207	10148	9.22513	60390	11.0086	25690000	17.0616	5453566	15.5118	1	1	2.54598e+06	14.75	0	0	0	1	0	144	29322	445	909	1	744330	814806	50.91	50.93	1	0	0	1	0	0	0	0	0	0	0	0	0	0	0
2021-03-21	Solomon Islands	17	1088	6.99302	99.1952	4.59709	142.336	4.95819	271	5.6058	2800	7.93773	25690000	17.0616	707851	13.47	1	0	3.10584e+06	14.9488	0	1	1	1	0	140	29322	1	909	0	744330	0	50.91	33.33	1	0	0	1	0	0	0	0	0	0	0	0	0	0	0
2021-03-22	South Africa	18	0	0	99.1952	4.59709	168.89	5.12925	5771	8.66077	200240	12.2073	25690000	17.0616	59392255	17.8997	1	1	2.18742e+06	14.5982	0	0	0	1	0	140	29322	34764	909	2853	744330	171540	50.91	58.33	1	0	0	1	0	0	0	0	0	0	0	0	0	0	0
2021-03-23	Sri Lanka	19	6428	8.76857	99.1952	4.59709	170.541	5.13897	474	6.16331	146950	11.8979	25690000	17.0616	22156000	16.9136	1	0	2.21538e+06	14.6109	0	1	1	1	0	141	29322	9612	909	104	744330	401060	50.91	79.17	1	0	0	1	0	0	0	0	0	0	0	0	0	0	0
2021-03-24	Taiwan	20	4284	8.36288	99.1952	4.59709	186692	12.1372		0	5090	8.53523	25690000	17.0616	23665024	16.9795	1	0	2.49793e+06	14.731	0	1	1	1	0	18	29322	75	909	1	744330	14400	50.91	25	1	0	0	1	0	0	0	0	0	0	0	0	0	0	0
2021-03-25	Thailand	21	3480	8.15507	99.1952	4.59709	112.26	4.72082	1470	7.2937	83450	11.332	25690000	17.0616	71601103	18.0866	0	1	2.38719e+06	14.6856	0	0	0	1	0	140	29322	2912	909	11	744330	6943	50.91	47.22	1	0	0	1	0	0	0	0	0	0	0	0	0	0	0
2021-03-26	Tonga	22	0	0	99.1952	4.59709	133.957	4.89752		0	15450	9.64543	25690000	17.0616	106017	11.5714	1	0	3.29898e+06	15.0091	0	1	1	1	0	140	29322	0	909	0	744330	0	50.91	0	1	0	0	1	0	0	0	0	0	0	0	0	0	0	0
2021-03-27	UK	23	0	0	99.1952	4.59709	111.118	4.71059	155078	11.9517	1172490	13.9746	25690000	17.0616	9365145	16.0525	1	1	1.83975e+06	14.4251	0	0	1	1	0	154	29322	169234	909	4295	744330	14569635	50.91	79.7481	1	0	0	1	0	0	0	0	0	0	0	0	0	0	0
2021-03-28	United Arab Emirates	24	48158	10.7823	99.1952	4.59709	121.731	4.80181		0	13550	9.51422	25690000	17.0616	67326569	18.0251	1	1	1.69913e+06	14.3456	0	1	0	1	0	140	29322	69920	909	276	744330	2288008	50.91	62.8287	1	0	0	1	0	0	0	0	0	0	0	0	0	0	0
2021-03-29	USA	25	53123	10.8804	99.1952	4.59709	121.472	4.79969	96235	11.4746	110160	11.6097	25690000	17.0616	331893745	19.6203	1	1	2.35545e+06	14.6722	0	0	0	1	0	156	29322	1815451	909	36671	744330	84153978	50.91	62.8287	1	0	0	1	0	0	0	0	0	0	0	0	0	0	0
2021-03-31	Vietnam	26	3288	8.09834	99.1952	4.59709	171.362	5.14378	37	3.63759	270340	12.5074	25690000	17.0616	97468029	18.395	1	1	2.43923e+06	14.7072	0	0	0	1	0	179	29322	155	909	0	744330	49743	50.91	61.5903	1	0	0	1	0	0	0	0	0	0	0	0	0	0	0
2021-04-01	Brunei	1	2794	7.93559	99.135	4.59648	102.215	4.62708	559	6.32794	3070	8.02976	25690000	17.0616	445373	13.0067	1	1	2.6268e+06	14.7813	0	0	0	1	0	144	29811	12	910	0	2234844	12790	49.1363	40.74	1	0	0	0	1	0	0	0	0	0	0	0	0	1	0
2021-04-02	Canada	2	0	0	99.135	4.59648	120.464	4.79135	22731	10.0315	56410	10.9404	25690000	17.0616	38246108	17.4596	1	1	2.24219e+06	14.623	0	0	0	1	0	176	29811	239868	910	1260	2234844	7769064	49.1363	75.46	1	0	0	0	1	0	0	0	0	0	0	0	0	0	1
2021-04-03	Chile	3	0	0	99.135	4.59648	139.97	4.94143		0	34940	10.4614	25690000	17.0616	19493184	16.7856	1	1	2.72558e+06	14.8182	0	0	0	1	0	163	29811	202707	910	3218	2234844	4437909	49.1363	82.034	1	0	0	0	1	0	0	0	0	0	0	0	0	0	0
2021-04-04	China	4	18446	9.82266	99.135	4.59648	129.088	4.8605	4052	8.30721	705080	13.4661	25690000	17.0616	1412360000	21.0685	1	1	2.36518e+06	14.6764	0	0	0	1	0	18	29811	873	910	0	2234844	145243000	49.1363	74.4747	1	0	0	0	1	0	0	0	0	0	0	0	0	0	0
2021-04-06	Fiji	5	3085	8.03463	99.135	4.59648	128.08	4.85265	1941	7.57147	79830	11.2877	25690000	17.0616	924610	13.7371	1	0	3.25977e+06	14.9972	0	1	1	1	0	140	29811	50	910	0	2234844	28295	49.1363	57.0393	1	0	0	0	1	0	0	0	0	0	0	0	0	0	0
2021-04-07	Hong Kong (SAR)	6	17766	9.7851	99.135	4.59648	137.599	4.92434	9486	9.15768	104760	11.5594	25690000	17.0616	7413100	15.8188	1	1	2.4499e+06	14.7116	0	0	0	1	0	144	29811	307	910	4	2234844	908693	49.1363	71.3	1	0	0	0	1	0	0	0	0	0	0	0	0	0	0
2021-04-08	India	7	1536	7.33759	99.135	4.59648	188.156	5.23727	3833	8.25166	721050	13.4885	25690000	17.0616	1407563842	21.0651	1	1	2.08445e+06	14.55	0	0	0	1	0	141	29811	6943304	910	48926	2234844	77932654	49.1363	70.896	1	0	0	0	1	0	0	0	0	0	0	0	0	0	0
2021-04-09	Indonesia	8	9455	9.1544	99.135	4.59648	156.109	5.05055	11400	9.34146	92400	11.4339	25690000	17.0616	273753191	19.4277	1	1	2.66431e+06	14.7955	0	0	0	1	0	142	29811	156656	910	4663	2234844	8210431	49.1363	71.76	1	0	0	0	1	0	0	0	0	0	0	0	0	0	0
2021-04-10	Japan	9	15416	9.64323	99.135	4.59648	104.517	4.64935	11572	9.35643	47020	10.7583	25690000	17.0616	125681593	18.6493	1	0	2.52658e+06	14.7424	0	1	1	1	0	3	29811	117685	910	1067	2234844	3062550	49.1363	45.3687	1	0	0	0	1	0	0	0	0	0	0	0	0	0	0
2021-04-11	Korea	10	3842	8.25401	99.1952	4.59709	118.07	4.77128	5604	8.63141	111530	11.6221	25690000	17.0616	25971909	17.0725	0	1	2.44391e+06	14.7091	0	0	0	1	0	141	29811	18995	910	96	2234844	2753334	49.1363	60.246	1	0	0	0	1	0	0	0	0	0	0	0	0	0	0
2021-04-12	Malaysia	11	4410	8.39186	99.135	4.59648	123.079	4.81283	6157	8.72551	177460	12.0865	25690000	17.0616	33573874	17.3293	1	1	2.52051e+06	14.74	0	0	0	1	0	144	29811	63213	910	234	2234844	757743	49.1363	60.246	1	0	0	0	1	0	0	0	0	0	0	0	0	0	0
2021-04-13	Mauritius	12	0	0	99.135	4.59648	136.62	4.9172		0	30150	10.314	25690000	17.0616	1266060	14.0514	1	0	2.24274e+06	14.6232	0	1	1	1	0	176	29811	243	910	6	2234844	0	49.1363	94.2613	1	0	0	0	1	0	0	0	0	0	0	0	0	0	0
2021-04-16	New Zealand	13	160578	11.9865	99.135	4.59648	1	0	85769	11.3594	574470	13.2612	25690000	17.0616	5122600	15.4492	1	0	3.33103e+06	15.0188	0	1	1	1	0	179	29811	112	910	0	2234844	202164	49.1363	22.9607	1	0	0	0	1	0	0	0	0	0	0	0	0	0	0
2021-04-18	Philippines	14	672	6.51175	99.135	4.59648	136.871	4.91904	4249	8.35467	310050	12.6445	25690000	17.0616	113880328	18.5507	1	0	2.62019e+06	14.7788	0	1	1	1	0	140	29811	290172	910	3937	2234844	688736	49.1363	80.6663	1	0	0	0	1	0	0	0	0	0	0	0	0	0	0
2021-04-19	Qatar	15	62112	11.0367	99.135	4.59648	113.251	4.72961		0	2010	7.60639	25690000	17.0616	2688235	14.8044	1	1	1.80914e+06	14.4084	0	0	0	1	0	154	29811	25688	910	167	2234844	221871	49.1363	86.5107	1	0	0	0	1	0	0	0	0	0	0	0	0	0	0
2021-04-20	Singapore	16	130138	11.7764	99.135	4.59648	115.63	4.75039	10148	9.22513	60390	11.0086	25690000	17.0616	5453566	15.5118	1	1	2.54598e+06	14.75	0	0	0	1	0	144	29811	764	910	0	2234844	1109153	49.1363	52.6277	1	0	0	0	1	0	0	0	0	0	0	0	0	0	0
2021-04-21	Solomon Islands	17	1360	7.21598	99.135	4.59648	139.043	4.93479	271	5.6058	2800	7.93773	25690000	17.0616	707851	13.47	1	0	3.10584e+06	14.9488	0	1	1	1	0	140	29811	1	910	0	2234844	0	49.1363	32.2193	1	0	0	0	1	0	0	0	0	0	0	0	0	0	0
2021-04-22	South Africa	18	0	0	99.135	4.59648	170.122	5.13651	5771	8.66077	200240	12.2073	25690000	17.0616	59392255	17.8997	1	1	2.18742e+06	14.5982	0	0	0	1	0	140	29811	33053	910	1504	2234844	43531	49.1363	58.33	1	0	0	0	1	0	0	0	0	0	0	0	0	0	0
2021-04-23	Sri Lanka	19	13980	9.54545	99.135	4.59648	170.661	5.13968	474	6.16331	146950	11.8979	25690000	17.0616	22156000	16.9136	1	0	2.21538e+06	14.6109	0	1	1	1	0	141	29811	15440	910	110	2234844	30756	49.1363	42.363	1	0	0	0	1	0	0	0	0	0	0	0	0	0	0
2021-04-24	Taiwan	20	4888	8.49474	99.135	4.59648	186994	12.1388		0	5090	8.53523	25690000	17.0616	23665024	16.9795	1	0	2.49793e+06	14.731	0	1	1	1	0	18	29811	98	910	2	2234844	39022	49.1363	25	1	0	0	0	1	0	0	0	0	0	0	0	0	0	0
2021-04-25	Thailand	21	2784	7.932	99.135	4.59648	113.812	4.73455	1470	7.2937	83450	11.332	25690000	17.0616	71601103	18.0866	0	1	2.38719e+06	14.6856	0	0	0	1	0	140	29811	36290	910	109	2234844	1265709	49.1363	51.6033	1	0	0	0	1	0	0	0	0	0	0	0	0	0	0
2021-04-26	Tonga	22	0	0	99.135	4.59648	134.472	4.90135		0	15450	9.64543	25690000	17.0616	106017	11.5714	1	0	3.29898e+06	15.0091	0	1	1	1	0	140	29811	0	910	0	2234844	0	49.1363	17.314	1	0	0	0	1	0	0	0	0	0	0	0	0	0	0
2021-04-27	UK	23	0	0	99.135	4.59648	111.609	4.715	155078	11.9517	1172490	13.9746	25690000	17.0616	9365145	16.0525	1	1	1.83975e+06	14.4251	0	0	1	1	0	154	29811	75695	910	1102	2234844	13658616	49.1363	64.5053	1	0	0	0	1	0	0	0	0	0	0	0	0	0	0
2021-04-28	United Arab Emirates	24	55870	10.9308	99.135	4.59648	122.508	4.80818		0	13550	9.51422	25690000	17.0616	67326569	18.0251	1	1	1.69913e+06	14.3456	0	1	0	1	0	140	29811	58792	910	90	2234844	1992738	49.1363	54.533	1	0	0	0	1	0	0	0	0	0	0	0	0	0	0
2021-04-29	USA	25	56769	10.9468	99.135	4.59648	122.471	4.80787	96235	11.4746	110160	11.6097	25690000	17.0616	331893745	19.6203	1	1	2.35545e+06	14.6722	0	0	0	1	0	156	29811	1888567	910	23831	2234844	90556919	49.1363	54.533	1	0	0	0	1	0	0	0	0	0	0	0	0	0	0
2021-04-30	Vietnam	26	2466	7.81076	99.135	4.59648	171.297	5.1434	37	3.63759	270340	12.5074	25690000	17.0616	97468029	18.395	1	1	2.43923e+06	14.7072	0	0	0	1	0	179	29811	325	910	0	2234844	469519	49.1363	56.0793	1	0	0	0	1	0	0	0	0	0	0	0	0	0	0
2021-05-03	Brunei	1	1778	7.48381	98.9767	4.59488	102.081	4.62577	559	6.32794	3070	8.02976	25690000	17.0616	445373	13.0067	1	1	2.6268e+06	14.7813	0	0	0	1	0	144	30118	18	910	0	4362739	23785	46.4294	40.74	1	0	0	0	0	1	0	0	0	0	0	0	0	1	0
2021-05-04	Canada	2	0	0	98.9767	4.59488	121.065	4.79632	22731	10.0315	56410	10.9404	25690000	17.0616	38246108	17.4596	1	1	2.24219e+06	14.623	0	0	0	1	0	176	30118	156561	910	1328	4362739	10515339	46.4294	75.281	1	0	0	0	0	1	0	0	0	0	0	0	0	0	1
2021-05-05	Chile	3	0	0	98.9767	4.59488	140.344	4.9441		0	34940	10.4614	25690000	17.0616	19493184	16.7856	1	1	2.72558e+06	14.8182	0	0	0	1	0	163	30118	186101	910	2947	4362739	3843687	46.4294	80.6584	1	0	0	0	0	1	0	0	0	0	0	0	0	0	0
2021-05-06	China	4	18358	9.81788	98.9767	4.59488	128.96	4.8595	4052	8.30721	705080	13.4661	25690000	17.0616	1412360000	21.0685	1	1	2.36518e+06	14.6764	0	0	0	1	0	18	30118	927	910	0	4362739	396404000	46.4294	67.8161	1	0	0	0	0	1	0	0	0	0	0	0	0	0	0
2021-05-08	Fiji	5	880	6.78106	98.9767	4.59488	129.227	4.86157	1941	7.57147	79830	11.2877	25690000	17.0616	924610	13.7371	1	0	3.25977e+06	14.9972	0	1	1	1	0	140	30118	321	910	2	4362739	0	46.4294	61.861	1	0	0	0	0	1	0	0	0	0	0	0	0	0	0
2021-05-09	Hong Kong (SAR)	6	26306	10.1776	98.9767	4.59488	137.328	4.92237	9486	9.15768	104760	11.5594	25690000	17.0616	7413100	15.8188	1	1	2.4499e+06	14.7116	0	0	0	1	0	144	30118	67	910	1	4362739	986710	46.4294	71.3	1	0	0	0	0	1	0	0	0	0	0	0	0	0	0
2021-05-10	India	7	0	0	98.9767	4.59488	191.256	5.25361	3833	8.25166	721050	13.4885	25690000	17.0616	1407563842	21.0651	1	1	2.08445e+06	14.55	0	0	0	1	0	141	30118	9010075	910	120042	4362739	55496176	46.4294	79.5216	1	0	0	0	0	1	0	0	0	0	0	0	0	0	0
2021-05-11	Indonesia	8	10728	9.28071	98.9767	4.59488	156.608	5.05375	11400	9.34146	92400	11.4339	25690000	17.0616	273753191	19.4277	1	1	2.66431e+06	14.7955	0	0	0	1	0	142	30118	153335	910	5057	4362739	7029762	46.4294	71.76	1	0	0	0	0	1	0	0	0	0	0	0	0	0	0
2021-05-12	Japan	9	16606	9.71758	98.9767	4.59488	104.834	4.65238	11572	9.35643	47020	10.7583	25690000	17.0616	125681593	18.6493	1	0	2.52658e+06	14.7424	0	1	1	1	0	3	30118	153716	910	2816	4362739	12554348	46.4294	49.07	1	0	0	0	0	1	0	0	0	0	0	0	0	0	0
2021-05-13	Korea	10	3874	8.2623	98.9767	4.59488	118.151	4.77196	5604	8.63141	111530	11.6221	25690000	17.0616	25971909	17.0725	0	1	2.44391e+06	14.7091	0	0	0	1	0	141	30118	18165	910	132	4362739	4448073	46.4294	75.1381	1	0	0	0	0	1	0	0	0	0	0	0	0	0	0
2021-05-14	Malaysia	11	7424	8.91261	98.9767	4.59488	123.079	4.81283	6157	8.72551	177460	12.0865	25690000	17.0616	33573874	17.3293	1	1	2.52051e+06	14.74	0	0	0	1	0	144	30118	163644	910	1290	4362739	1578487	46.4294	75.1381	1	0	0	0	0	1	0	0	0	0	0	0	0	0	0
2021-05-15	Mauritius	12	0	0	98.9767	4.59488	137.622	4.92451		0	30150	10.314	25690000	17.0616	1266060	14.0514	1	0	2.24274e+06	14.6232	0	1	1	1	0	176	30118	205	910	2	4362739	0	46.4294	77.0626	1	0	0	0	0	1	0	0	0	0	0	0	0	0	0
2021-05-18	New Zealand	13	337272	12.7286	98.9767	4.59488	1	0	85769	11.3594	574470	13.2612	25690000	17.0616	5122600	15.4492	1	0	3.33103e+06	15.0188	0	1	1	1	0	179	30118	61	910	0	4362739	376175	46.4294	22.22	1	0	0	0	0	1	0	0	0	0	0	0	0	0	0
2021-05-20	Philippines	14	1680	7.42714	98.9767	4.59488	136.871	4.91904	4249	8.35467	310050	12.6445	25690000	17.0616	113880328	18.5507	1	0	2.62019e+06	14.7788	0	1	1	1	0	140	30118	192841	910	3732	4362739	1676968	46.4294	69.8503	1	0	0	0	0	1	0	0	0	0	0	0	0	0	0
2021-05-21	Qatar	15	68745	11.1382	98.9767	4.59488	114.195	4.73791		0	2010	7.60639	25690000	17.0616	2688235	14.8044	1	1	1.80914e+06	14.4084	0	0	0	1	0	154	30118	11806	910	98	4362739	739719	46.4294	85.7645	1	0	0	0	0	1	0	0	0	0	0	0	0	0	0
2021-05-22	Singapore	16	167991	12.0317	98.9767	4.59488	116.56	4.75841	10148	9.22513	60390	11.0086	25690000	17.0616	5453566	15.5118	1	1	2.54598e+06	14.75	0	0	0	1	0	144	30118	906	910	3	4362739	1156380	46.4294	54.9284	1	0	0	0	0	1	0	0	0	0	0	0	0	0	0
2021-05-23	Solomon Islands	17	1088	6.99302	98.9767	4.59488	138.283	4.92931	271	5.6058	2800	7.93773	25690000	17.0616	707851	13.47	1	0	3.10584e+06	14.9488	0	1	1	1	0	140	30118	0	910	0	4362739	0	46.4294	25	1	0	0	0	0	1	0	0	0	0	0	0	0	0	0
2021-05-24	South Africa	18	0	0	98.9767	4.59488	170.298	5.13755	5771	8.66077	200240	12.2073	25690000	17.0616	59392255	17.8997	1	1	2.18742e+06	14.5982	0	0	0	1	0	140	30118	84407	910	2156	4362739	648794	46.4294	50.8065	1	0	0	0	0	1	0	0	0	0	0	0	0	0	0
2021-05-25	Sri Lanka	19	11074	9.31245	98.9767	4.59488	172.341	5.14947	474	6.16331	146950	11.8979	25690000	17.0616	22156000	16.9136	1	0	2.21538e+06	14.6109	0	1	1	1	0	141	30118	78218	910	763	4362739	825201	46.4294	85.0068	1	0	0	0	0	1	0	0	0	0	0	0	0	0	0
2021-05-26	Taiwan	20	1216	7.10414	98.9767	4.59488	186994	12.1388		0	5090	8.53523	25690000	17.0616	23665024	16.9795	1	0	2.49793e+06	14.731	0	1	1	1	0	18	30118	7383	910	112	4362739	228489	46.4294	49.1342	1	0	0	0	0	1	0	0	0	0	0	0	0	0	0
2021-05-27	Thailand	21	2088	7.64444	98.9767	4.59488	112.759	4.72525	1470	7.2937	83450	11.332	25690000	17.0616	71601103	18.0866	0	1	2.38719e+06	14.6856	0	0	0	1	0	140	30118	94639	910	828	4362739	2048205	46.4294	59.26	1	0	0	0	0	1	0	0	0	0	0	0	0	0	0
2021-05-28	Tonga	22	0	0	98.9767	4.59488	134.214	4.89944		0	15450	9.64543	25690000	17.0616	106017	11.5714	1	0	3.29898e+06	15.0091	0	1	1	1	0	140	30118	0	910	0	4362739	0	46.4294	47.22	1	0	0	0	0	1	0	0	0	0	0	0	0	0	0
2021-05-29	UK	23	0	0	98.9767	4.59488	111.893	4.71754	155078	11.9517	1172490	13.9746	25690000	17.0616	9365145	16.0525	1	1	1.83975e+06	14.4251	0	0	1	1	0	154	30118	73080	910	424	4362739	15892359	46.4294	61.1548	1	0	0	0	0	1	0	0	0	0	0	0	0	0	0
2021-05-30	United Arab Emirates	24	57744	10.9638	98.9767	4.59488	123.174	4.8136		0	13550	9.51422	25690000	17.0616	67326569	18.0251	1	1	1.69913e+06	14.3456	0	1	0	1	0	140	30118	50600	910	93	4362739	1765349	46.4294	57.27	1	0	0	0	0	1	0	0	0	0	0	0	0	0	0
2021-05-31	USA	25	65378	11.088	98.9767	4.59488	123.453	4.81586	96235	11.4746	110160	11.6097	25690000	17.0616	331893745	19.6203	1	1	2.35545e+06	14.6722	0	0	0	1	0	156	30118	918463	910	18143	4362739	50683144	46.4294	57.27	1	0	0	0	0	1	0	0	0	0	0	0	0	0	0
2021-05-31	Vietnam	26	3125	8.04751	98.9767	4.59488	171.568	5.14498	37	3.63759	270340	12.5074	25690000	17.0616	97468029	18.395	1	1	2.43923e+06	14.7072	0	0	0	1	0	179	30118	4504	910	12	4362739	37208	46.4294	73.6697	1	0	0	0	0	1	0	0	0	0	0	0	0	0	0
2021-06-03	Brunei	1	3556	8.17667	98.7675	4.59277	102.685	4.63166	559	6.32794	3070	8.02976	25690000	17.0616	445373	13.0067	1	1	2.6268e+06	14.7813	0	0	0	1	0	144	30643	18	910	0	7742536	8180	62.5	40.74	1	0	0	0	0	0	1	0	0	0	0	0	0	1	0
2021-06-04	Canada	2	0	0	98.7675	4.59277	121.408	4.79916	22731	10.0315	56410	10.9404	25690000	17.0616	38246108	17.4596	1	1	2.24219e+06	14.623	0	0	0	1	0	176	30643	32657	910	748	7742536	13591764	62.5	72.87	1	0	0	0	0	0	1	0	0	0	0	0	0	0	1
2021-06-05	Chile	3	0	0	98.7675	4.59277	140.46	4.94492		0	34940	10.4614	25690000	17.0616	19493184	16.7856	1	1	2.72558e+06	14.8182	0	0	0	1	0	163	30643	171556	910	3245	7742536	4313438	62.5	84.72	1	0	0	0	0	0	1	0	0	0	0	0	0	0	0
2021-06-06	China	4	17836	9.78903	98.7675	4.59277	128.448	4.85552	4052	8.30721	705080	13.4661	25690000	17.0616	1412360000	21.0685	1	1	2.36518e+06	14.6764	0	0	0	1	0	18	30643	1206	910	0	7742536	583207000	62.5	72.2527	1	0	0	0	0	0	1	0	0	0	0	0	0	0	0
2021-06-08	Fiji	5	1956	7.57917	98.7675	4.59277	128.768	4.85801	1941	7.57147	79830	11.2877	25690000	17.0616	924610	13.7371	1	0	3.25977e+06	14.9972	0	1	1	1	0	140	30643	3980	910	17	7742536	0	62.5	86.11	1	0	0	0	0	0	1	0	0	0	0	0	0	0	0
2021-06-09	Hong Kong (SAR)	6	48116	10.7814	98.7675	4.59277	136.923	4.91942	9486	9.15768	104760	11.5594	25690000	17.0616	7413100	15.8188	1	1	2.4499e+06	14.7116	0	0	0	1	0	144	30643	82	910	1	7742536	1328879	62.5	71.3	1	0	0	0	0	0	1	0	0	0	0	0	0	0	0
2021-06-10	India	7	0	0	98.7675	4.59277	192.329	5.25921	3833	8.25166	721050	13.4885	25690000	17.0616	1407563842	21.0651	1	1	2.08445e+06	14.55	0	0	0	1	0	141	30643	2236590	910	60190	7742536	118708244	62.5	81.94	1	0	0	0	0	0	1	0	0	0	0	0	0	0	0
2021-06-11	Indonesia	8	5364	8.58765	98.7675	4.59277	156.359	5.05215	11400	9.34146	92400	11.4339	25690000	17.0616	273753191	19.4277	1	1	2.66431e+06	14.7955	0	0	0	1	0	142	30643	356569	910	7913	7742536	15699134	62.5	71.76	1	0	0	0	0	0	1	0	0	0	0	0	0	0	0
2021-06-12	Japan	9	15646	9.65803	98.7675	4.59277	104.939	4.65338	11572	9.35643	47020	10.7583	25690000	17.0616	125681593	18.6493	1	0	2.52658e+06	14.7424	0	1	1	1	0	3	30643	53096	910	1724	7742536	36471700	62.5	53.2693	1	0	0	0	0	0	1	0	0	0	0	0	0	0	0
2021-06-13	Korea	10	3568	8.18004	98.7675	4.59277	118.151	4.77196	5604	8.63141	111530	11.6221	25690000	17.0616	25971909	17.0725	0	1	2.44391e+06	14.7091	0	0	0	1	0	141	30643	16924	910	58	7742536	11369592	62.5	84.413	1	0	0	0	0	0	1	0	0	0	0	0	0	0	0
2021-06-14	Malaysia	11	3074	8.03106	98.7675	4.59277	123.179	4.81364	6157	8.72551	177460	12.0865	25690000	17.0616	33573874	17.3293	1	1	2.52051e+06	14.74	0	0	0	1	0	144	30643	179622	910	2374	7742536	5263588	62.5	84.413	1	0	0	0	0	0	1	0	0	0	0	0	0	0	0
2021-06-15	Mauritius	12	0	0	98.7675	4.59277	139.628	4.93898		0	30150	10.314	25690000	17.0616	1266060	14.0514	1	0	2.24274e+06	14.6232	0	1	1	1	0	176	30643	487	910	0	7742536	0	62.5	159.883	1	0	0	0	0	0	1	0	0	0	0	0	0	0	0
2021-06-18	New Zealand	13	238808	12.3834	98.7675	4.59277	1	0	85769	11.3594	574470	13.2612	25690000	17.0616	5122600	15.4492	1	0	3.33103e+06	15.0188	0	1	1	1	0	179	30643	69	910	0	7742536	523835	62.5	22.9607	1	0	0	0	0	0	1	0	0	0	0	0	0	0	0
2021-06-20	Philippines	14	1344	7.20415	98.7675	4.59277	137.124	4.92089	4249	8.35467	310050	12.6445	25690000	17.0616	113880328	18.5507	1	0	2.62019e+06	14.7788	0	1	1	1	0	140	30643	182258	910	3696	7742536	2849438	62.5	76.1907	1	0	0	0	0	0	1	0	0	0	0	0	0	0	0
2021-06-21	Qatar	15	65168	11.0847	98.7675	4.59277	113.962	4.73586		0	2010	7.60639	25690000	17.0616	2688235	14.8044	1	1	1.80914e+06	14.4084	0	0	0	1	0	154	30643	4613	910	34	7742536	929366	62.5	67.917	1	0	0	0	0	0	1	0	0	0	0	0	0	0	0
2021-06-22	Singapore	16	171219	12.0507	98.7675	4.59277	116.545	4.75828	10148	9.22513	60390	11.0086	25690000	17.0616	5453566	15.5118	1	1	2.54598e+06	14.75	0	0	0	1	0	144	30643	528	910	3	7742536	1417256	62.5	59.9043	1	0	0	0	0	0	1	0	0	0	0	0	0	0	0
2021-06-23	Solomon Islands	17	1088	6.99302	98.7675	4.59277	134.991	4.90521	271	5.6058	2800	7.93773	25690000	17.0616	707851	13.47	1	0	3.10584e+06	14.9488	0	1	1	1	0	140	30643	0	910	0	7742536	0	62.5	25	1	0	0	0	0	0	1	0	0	0	0	0	0	0	0
2021-06-24	South Africa	18	0	0	98.7675	4.59277	170.825	5.14064	5771	8.66077	200240	12.2073	25690000	17.0616	59392255	17.8997	1	1	2.18742e+06	14.5982	0	0	0	1	0	140	30643	308355	910	4141	7742536	1572908	62.5	50	1	0	0	0	0	0	1	0	0	0	0	0	0	0	0
2021-06-25	Sri Lanka	19	9328	9.14088	98.7675	4.59277	174.861	5.16399	474	6.16331	146950	11.8979	25690000	17.0616	22156000	16.9136	1	0	2.21538e+06	14.6109	0	1	1	1	0	141	30643	72725	910	1636	7742536	1400026	62.5	83.2113	1	0	0	0	0	0	1	0	0	0	0	0	0	0	0
2021-06-26	Taiwan	20	1292	7.16472	98.7675	4.59277	186994	12.1388		0	5090	8.53523	25690000	17.0616	23665024	16.9795	1	0	2.49793e+06	14.731	0	1	1	1	0	18	30643	6293	910	524	7742536	1270707	62.5	71.4847	1	0	0	0	0	0	1	0	0	0	0	0	0	0	0
2021-06-27	Thailand	21	3828	8.25036	98.7675	4.59277	113.189	4.72906	1470	7.2937	83450	11.332	25690000	17.0616	71601103	18.0866	0	1	2.38719e+06	14.6856	0	0	0	1	0	140	30643	99509	910	992	7742536	6054968	62.5	56.1093	1	0	0	0	0	0	1	0	0	0	0	0	0	0	0
2021-06-28	Tonga	22	0	0	98.7675	4.59277	135.372	4.90803		0	15450	9.64543	25690000	17.0616	106017	11.5714	1	0	3.29898e+06	15.0091	0	1	1	1	0	140	30643	0	910	0	7742536	0	62.5	40.804	1	0	0	0	0	0	1	0	0	0	0	0	0	0	0
2021-06-29	UK	23	0	0	98.7675	4.59277	112.11	4.71948	155078	11.9517	1172490	13.9746	25690000	17.0616	9365145	16.0525	1	1	1.83975e+06	14.4251	0	0	1	1	0	154	30643	313568	910	482	7742536	12697300	62.5	52.8713	1	0	0	0	0	0	1	0	0	0	0	0	0	0	0
2021-06-30	United Arab Emirates	24	59186	10.9885	98.7675	4.59277	123.618	4.81719		0	13550	9.51422	25690000	17.0616	67326569	18.0251	1	1	1.69913e+06	14.3456	0	1	0	1	0	140	30643	62071	910	131	7742536	2160296	62.5	57.6413	1	0	0	0	0	0	1	0	0	0	0	0	0	0	0
2021-06-29	USA	25	64887	11.0804	98.7675	4.59277	124.599	4.8251	96235	11.4746	110160	11.6097	25690000	17.0616	331893745	19.6203	1	1	2.35545e+06	14.6722	0	0	0	1	0	156	30643	395965	910	10433	7742536	25457900	62.5	57.6413	1	0	0	0	0	0	1	0	0	0	0	0	0	0	0
2021-06-29	Vietnam	26	2192	7.69303	98.7675	4.59277	171.89	5.14685	37	3.63759	270340	12.5074	25690000	17.0616	97468029	18.395	1	1	2.43923e+06	14.7072	0	0	0	1	0	179	30643	9620	910	34	7742536	2520356	62.5	76.755	1	0	0	0	0	0	1	0	0	0	0	0	0	0	0
2021-07-05	Brunei	1	3048	8.02257	98.6124	4.5912	102.44	4.62927	559	6.32794	3070	8.02976	25690000	17.0616	445373	13.0067	1	1	2.6268e+06	14.7813	0	0	0	1	0	144	34383	77	924	0	12334071	39510	68.06	38.9465	1	0	0	0	0	0	0	1	0	0	0	0	0	1	0
2021-07-06	Canada	2	298	5.70044	98.6124	4.5912	122.181	4.8055	22731	10.0315	56410	10.9404	25690000	17.0616	38246108	17.4596	1	1	2.24219e+06	14.623	0	0	0	1	0	176	34383	15219	924	303	12334071	11860611	68.06	67.2	1	0	0	0	0	0	0	1	0	0	0	0	0	0	1
2021-07-07	Chile	3	741	6.60935	98.6124	4.5912	141.595	4.95297		0	34940	10.4614	25690000	17.0616	19493184	16.7856	1	1	2.72558e+06	14.8182	0	0	0	1	0	163	34383	59869	924	2903	12334071	2804534	68.06	73.8235	1	0	0	0	0	0	0	1	0	0	0	0	0	0	0
2021-07-08	China	4	16350	9.70204	98.6124	4.5912	128.832	4.85851	4052	8.30721	705080	13.4661	25690000	17.0616	1412360000	21.0685	1	1	2.36518e+06	14.6764	0	0	0	1	0	18	34383	1698	924	3	12334071	408144000	68.06	75.3103	1	0	0	0	0	0	0	1	0	0	0	0	0	0	0
2021-07-10	Fiji	5	2133	7.66575	98.6124	4.5912	128.653	4.85712	1941	7.57147	79830	11.2877	25690000	17.0616	924610	13.7371	1	0	3.25977e+06	14.9972	0	1	1	1	0	140	34383	25363	924	217	12334071	0	68.06	86.11	1	0	0	0	0	0	0	1	0	0	0	0	0	0	0
2021-07-11	Hong Kong (SAR)	6	57188	10.9541	98.6124	4.5912	137.058	4.9204	9486	9.15768	104760	11.5594	25690000	17.0616	7413100	15.8188	1	1	2.4499e+06	14.7116	0	0	0	1	0	144	34383	61	924	1	12334071	1933800	68.06	66.9955	1	0	0	0	0	0	0	1	0	0	0	0	0	0	0
2021-07-12	India	7	0	0	98.6124	4.5912	193.76	5.26662	3833	8.25166	721050	13.4885	25690000	17.0616	1407563842	21.0651	1	1	2.08445e+06	14.55	0	0	0	1	0	141	34383	1244190	924	24892	12334071	118404290	68.06	79.911	1	0	0	0	0	0	0	1	0	0	0	0	0	0	0
2021-07-13	Indonesia	8	3310	8.10501	98.6124	4.5912	156.476	5.0529	11400	9.34146	92400	11.4339	25690000	17.0616	273753191	19.4277	1	1	2.66431e+06	14.7955	0	0	0	1	0	142	34383	1231386	924	35628	12334071	25016696	68.06	71.619	1	0	0	0	0	0	0	1	0	0	0	0	0	0	0
2021-07-14	Japan	9	15684	9.66046	98.6124	4.5912	105.15	4.65539	11572	9.35643	47020	10.7583	25690000	17.0616	125681593	18.6493	1	0	2.52658e+06	14.7424	0	1	1	1	0	3	34383	127021	924	408	12334071	46294329	68.06	51.0877	1	0	0	0	0	0	0	1	0	0	0	0	0	0	0
2021-07-15	Korea	10	4180	8.33831	98.6124	4.5912	118.394	4.77402	5604	8.63141	111530	11.6221	25690000	17.0616	25971909	17.0725	0	1	2.44391e+06	14.7091	0	0	0	1	0	141	34383	42064	924	77	12334071	6282317	68.06	89.1616	1	0	0	0	0	0	0	1	0	0	0	0	0	0	0
2021-07-16	Malaysia	11	4205	8.34427	98.6124	4.5912	122.48	4.80794	6157	8.72551	177460	12.0865	25690000	17.0616	33573874	17.3293	1	1	2.52051e+06	14.74	0	0	0	1	0	144	34383	361293	924	3854	12334071	12818217	68.06	89.1616	1	0	0	0	0	0	0	1	0	0	0	0	0	0	0
2021-07-17	Mauritius	12	0	0	98.6124	4.5912	140.004	4.94167		0	30150	10.314	25690000	17.0616	1266060	14.0514	1	0	2.24274e+06	14.6232	0	1	1	1	0	176	34383	2316	924	2	12334071	0	68.06	53.9126	1	0	0	0	0	0	0	1	0	0	0	0	0	0	0
2021-07-20	New Zealand	13	193492	12.173	98.6124	4.5912	1	0	85769	11.3594	574470	13.2612	25690000	17.0616	5122600	15.4492	1	0	3.33103e+06	15.0188	0	1	1	1	0	179	34383	131	924	0	12334071	749095	68.06	22.22	1	0	0	0	0	0	0	1	0	0	0	0	0	0	0
2021-07-22	Philippines	14	1680	7.42714	98.6124	4.5912	137.757	4.92549	4249	8.35467	310050	12.6445	25690000	17.0616	113880328	18.5507	1	0	2.62019e+06	14.7788	0	1	1	1	0	140	34383	176406	924	3227	12334071	2122717	68.06	71.5471	1	0	0	0	0	0	0	1	0	0	0	0	0	0	0
2021-07-23	Qatar	15	63454	11.0581	98.6124	4.5912	114.987	4.74482		0	2010	7.60639	25690000	17.0616	2688235	14.8044	1	1	1.80914e+06	14.4084	0	0	0	1	0	154	34383	4168	924	11	12334071	599869	68.06	56.7506	1	0	0	0	0	0	0	1	0	0	0	0	0	0	0
2021-07-24	Singapore	16	224414	12.3213	98.6124	4.5912	116.319	4.75633	10148	9.22513	60390	11.0086	25690000	17.0616	5453566	15.5118	1	1	2.54598e+06	14.75	0	0	0	1	0	144	34383	2402	924	1	12334071	2086395	68.06	51.3565	1	0	0	0	0	0	0	1	0	0	0	0	0	0	0
2021-07-25	Solomon Islands	17	816	6.70564	98.6124	4.5912	134.358	4.90051	271	5.6058	2800	7.93773	25690000	17.0616	707851	13.47	1	0	3.10584e+06	14.9488	0	1	1	1	0	140	34383	0	924	0	12334071	0	68.06	30.3768	1	0	0	0	0	0	0	1	0	0	0	0	0	0	0
2021-07-26	South Africa	18	0	0	98.6124	4.5912	172.585	5.15089	5771	8.66077	200240	12.2073	25690000	17.0616	59392255	17.8997	1	1	2.18742e+06	14.5982	0	0	0	1	0	140	34383	473482	924	11366	12334071	1742677	68.06	44.2765	1	0	0	0	0	0	0	1	0	0	0	0	0	0	0
2021-07-27	Sri Lanka	19	12820	9.45884	98.6124	4.5912	175.941	5.17015	474	6.16331	146950	11.8979	25690000	17.0616	22156000	16.9136	1	0	2.21538e+06	14.6109	0	1	1	1	0	141	34383	49723	924	1359	12334071	7768953	68.06	81.48	1	0	0	0	0	0	0	1	0	0	0	0	0	0	0
2021-07-28	Taiwan	20	6112	8.71817	98.6124	4.5912	194550	12.1784		0	5090	8.53523	25690000	17.0616	23665024	16.9795	1	0	2.49793e+06	14.731	0	1	1	1	0	18	34383	870	924	139	12334071	4991772	68.06	71.2329	1	0	0	0	0	0	0	1	0	0	0	0	0	0	0
2021-07-29	Thailand	21	4818	8.48032	98.6124	4.5912	113.053	4.72786	1470	7.2937	83450	11.332	25690000	17.0616	71601103	18.0866	0	1	2.38719e+06	14.6856	0	0	0	1	0	140	34383	337986	924	2834	12334071	7758276	68.06	59.3181	1	0	0	0	0	0	0	1	0	0	0	0	0	0	0
2021-07-30	Tonga	22	0	0	98.6124	4.5912	135.887	4.91182		0	15450	9.64543	25690000	17.0616	106017	11.5714	1	0	3.29898e+06	15.0091	0	1	1	1	0	140	34383	0	924	0	12334071	0	68.06	42.1765	1	0	0	0	0	0	0	1	0	0	0	0	0	0	0
2021-07-31	UK	23	0	0	98.6124	4.5912	112.03	4.71877	155078	11.9517	1172490	13.9746	25690000	17.0616	9365145	16.0525	1	1	1.83975e+06	14.4251	0	0	1	1	0	154	34383	1055621	924	1827	12334071	7229376	68.06	48.2826	1	0	0	0	0	0	0	1	0	0	0	0	0	0	0
2021-07-31	United Arab Emirates	24	60648	11.0129	98.6124	4.5912	123.618	4.81719		0	13550	9.51422	25690000	17.0616	67326569	18.0251	1	1	1.69913e+06	14.3456	0	1	0	1	0	140	34383	47951	924	138	12334071	1102753	68.06	49.4494	1	0	0	0	0	0	0	1	0	0	0	0	0	0	0
2021-07-31	USA	25	65160	11.0846	98.6124	4.5912	125.199	4.8299	96235	11.4746	110160	11.6097	25690000	17.0616	331893745	19.6203	1	1	2.35545e+06	14.6722	0	0	0	1	0	156	34383	1325058	924	8798	12334071	16485275	68.06	49.4494	1	0	0	0	0	0	0	1	0	0	0	0	0	0	0
2021-07-31	Vietnam	26	1644	7.4055	98.6124	4.5912	172.96	5.15306	37	3.63759	270340	12.5074	25690000	17.0616	97468029	18.395	1	1	2.43923e+06	14.7072	0	0	0	1	0	179	34383	133008	924	1225	12334071	2426886	68.06	78.2126	1	0	0	0	0	0	0	1	0	0	0	0	0	0	0
2021-08-05	Brunei	1	2794	7.93559	98.6208	4.59128	102.673	4.63155	559	6.32794	3070	8.02976	25690000	17.0616	445373	13.0067	1	1	2.6268e+06	14.7813	0	0	0	1	0	144	55093	2375	1012	6	19663122	15237	70.4471	67.71	1	0	0	0	0	0	0	0	1	0	0	0	0	1	0
2021-08-06	Canada	2	0	0	98.6208	4.59128	122.438	4.80761	22731	10.0315	56410	10.9404	25690000	17.0616	38246108	17.4596	1	1	2.24219e+06	14.623	0	0	0	1	0	176	55093	69314	1012	335	19663122	4060833	70.4471	62.8032	1	0	0	0	0	0	0	0	1	0	0	0	0	0	1
2021-08-07	Chile	3	0	0	98.6208	4.59128	142.098	4.95652		0	34940	10.4614	25690000	17.0616	19493184	16.7856	1	1	2.72558e+06	14.8182	0	0	0	1	0	163	55093	22904	1012	1489	19663122	3160860	70.4471	58.4839	1	0	0	0	0	0	0	0	1	0	0	0	0	0	0
2021-08-08	China	4	15762	9.66542	98.6208	4.59128	128.96	4.8595	4052	8.30721	705080	13.4661	25690000	17.0616	1412360000	21.0685	1	1	2.36518e+06	14.6764	0	0	0	1	0	18	55093	2477	1012	0	19663122	414770000	70.4471	70.83	1	0	0	0	0	0	0	0	1	0	0	0	0	0	0
2021-08-10	Fiji	5	3448	8.14584	98.6208	4.59128	129.112	4.86068	1941	7.57147	79830	11.2877	25690000	17.0616	924610	13.7371	1	0	3.25977e+06	14.9972	0	1	1	1	0	140	55093	16935	1012	258	19663122	0	70.4471	86.11	1	0	0	0	0	0	0	0	1	0	0	0	0	0	0
2021-08-11	Hong Kong (SAR)	6	57764	10.9641	98.6208	4.59128	137.193	4.92139	9486	9.15768	104760	11.5594	25690000	17.0616	7413100	15.8188	1	1	2.4499e+06	14.7116	0	0	0	1	0	144	55093	128	1012	0	19663122	1925331	70.4471	63.5581	1	0	0	0	0	0	0	0	1	0	0	0	0	0	0
2021-08-12	India	7	0	0	98.6208	4.59128	194.237	5.26908	3833	8.25166	721050	13.4885	25690000	17.0616	1407563842	21.0651	1	1	2.08445e+06	14.55	0	0	0	1	0	141	55093	1155021	1012	14669	19663122	140320023	70.4471	71.7926	1	0	0	0	0	0	0	0	1	0	0	0	0	0	0
2021-08-13	Indonesia	8	3792	8.24091	98.6208	4.59128	156.52	5.05318	11400	9.34146	92400	11.4339	25690000	17.0616	273753191	19.4277	1	1	2.66431e+06	14.7955	0	0	0	1	0	142	55093	680143	1012	38904	19663122	31205162	70.4471	71.4748	1	0	0	0	0	0	0	0	1	0	0	0	0	0	0
2021-08-14	Japan	9	14180	9.55966	98.6208	4.59128	105.15	4.65539	11572	9.35643	47020	10.7583	25690000	17.0616	125681593	18.6493	1	0	2.52658e+06	14.7424	0	1	1	1	0	3	55093	567768	1012	874	19663122	36990224	70.4471	51.1165	1	0	0	0	0	0	0	0	1	0	0	0	0	0	0
2021-08-15	Korea	10	4688	8.45297	98.6208	4.59128	118.961	4.7788	5604	8.63141	111530	11.6221	25690000	17.0616	25971909	17.0725	0	1	2.44391e+06	14.7091	0	0	0	1	0	141	55093	53658	1012	194	19663122	18428777	70.4471	77.4148	1	0	0	0	0	0	0	0	1	0	0	0	0	0	0
2021-08-16	Malaysia	11	6090	8.71457	98.6208	4.59128	122.48	4.80794	6157	8.72551	177460	12.0865	25690000	17.0616	33573874	17.3293	1	1	2.52051e+06	14.74	0	0	0	1	0	144	55093	632982	1012	7640	19663122	14442151	70.4471	77.4148	1	0	0	0	0	0	0	0	1	0	0	0	0	0	0
2021-08-17	Mauritius	12	0	0	98.6208	4.59128	139.878	4.94077		0	30150	10.314	25690000	17.0616	1266060	14.0514	1	0	2.24274e+06	14.6232	0	1	1	1	0	176	55093	6462	1012	11	19663122	0	70.4471	50.5048	1	0	0	0	0	0	0	0	1	0	0	0	0	0	0
2021-08-20	New Zealand	13	20376	9.92216	98.6208	4.59128	1	0	85769	11.3594	574470	13.2612	25690000	17.0616	5122600	15.4492	1	0	3.33103e+06	15.0188	0	1	1	1	0	179	55093	696	1012	1	19663122	1591216	70.4471	58.0652	1	0	0	0	0	0	0	0	1	0	0	0	0	0	0
2021-08-22	Philippines	14	2016	7.60937	98.6208	4.59128	138.517	4.93099	4249	8.35467	310050	12.6445	25690000	17.0616	113880328	18.5507	1	0	2.62019e+06	14.7788	0	1	1	1	0	140	55093	400892	1012	5559	19663122	2430632	70.4471	77.3919	1	0	0	0	0	0	0	0	1	0	0	0	0	0	0
2021-08-23	Qatar	15	49843	10.8167	98.6208	4.59128	115.336	4.74785		0	2010	7.60639	25690000	17.0616	2688235	14.8044	1	1	1.80914e+06	14.4084	0	0	0	1	0	154	55093	6505	1012	1	19663122	591817	70.4471	53.219	1	0	0	0	0	0	0	0	1	0	0	0	0	0	0
2021-08-24	Singapore	16	211382	12.2614	98.6208	4.59128	116.958	4.76182	10148	9.22513	60390	11.0086	25690000	17.0616	5453566	15.5118	1	1	2.54598e+06	14.75	0	0	0	1	0	144	55093	2639	1012	18	19663122	1112168	70.4471	46.1858	1	0	0	0	0	0	0	0	1	0	0	0	0	0	0
2021-08-25	Solomon Islands	17	544	6.30079	98.6208	4.59128	134.864	4.90427	271	5.6058	2800	7.93773	25690000	17.0616	707851	13.47	1	0	3.10584e+06	14.9488	0	1	1	1	0	140	55093	0	1012	0	19663122	0	70.4471	38.89	1	0	0	0	0	0	0	0	1	0	0	0	0	0	0
2021-08-26	South Africa	18	0	0	98.6208	4.59128	173.288	5.15496	5771	8.66077	200240	12.2073	25690000	17.0616	59392255	17.8997	1	1	2.18742e+06	14.5982	0	0	0	1	0	140	55093	330205	1012	10248	19663122	1946671	70.4471	50.1903	1	0	0	0	0	0	0	0	1	0	0	0	0	0	0
2021-08-27	Sri Lanka	19	10494	9.25865	98.6208	4.59128	176.541	5.17356	474	6.16331	146950	11.8979	25690000	17.0616	22156000	16.9136	1	0	2.21538e+06	14.6109	0	1	1	1	0	141	55093	131490	1012	4749	19663122	5597361	70.4471	81.4803	1	0	0	0	0	0	0	0	1	0	0	0	0	0	0
2021-08-28	Taiwan	20	5472	8.60758	98.6208	4.59128	194550	12.1784		0	5090	8.53523	25690000	17.0616	23665024	16.9795	1	0	2.49793e+06	14.731	0	1	1	1	0	18	55093	321	1012	48	19663122	2470409	70.4471	60.2465	1	0	0	0	0	0	0	0	1	0	0	0	0	0	0
2021-08-29	Thailand	21	6264	8.74273	98.6208	4.59128	112.849	4.72605	1470	7.2937	83450	11.332	25690000	17.0616	71601103	18.0866	0	1	2.38719e+06	14.6856	0	0	0	1	0	140	55093	607442	1012	6732	19663122	13686109	70.4471	73.2232	1	0	0	0	0	0	0	0	1	0	0	0	0	0	0
2021-08-30	Tonga	22	0	0	98.6208	4.59128	136.144	4.91372		0	15450	9.64543	25690000	17.0616	106017	11.5714	1	0	3.29898e+06	15.0091	0	1	1	1	0	140	55093	0	1012	0	19663122	0	70.4471	43.52	1	0	0	0	0	0	0	0	1	0	0	0	0	0	0
2021-08-31	UK	23	0	0	98.6208	4.59128	112.51	4.72304	155078	11.9517	1172490	13.9746	25690000	17.0616	9365145	16.0525	1	1	1.83975e+06	14.4251	0	0	1	1	0	154	55093	933053	1012	3317	19663122	5859342	70.4471	43.98	1	0	0	0	0	0	0	0	1	0	0	0	0	0	0
2021-08-31	United Arab Emirates	24	61542	11.0275	98.6208	4.59128	124.394	4.82346		0	13550	9.51422	25690000	17.0616	67326569	18.0251	1	1	1.69913e+06	14.3456	0	1	0	1	0	140	55093	37512	1012	92	19663122	1141811	70.4471	51.8126	1	0	0	0	0	0	0	0	1	0	0	0	0	0	0
2021-08-31	USA	25	62074	11.0361	98.6208	4.59128	125.458	4.83197	96235	11.4746	110160	11.6097	25690000	17.0616	331893745	19.6203	1	1	2.35545e+06	14.6722	0	0	0	1	0	156	55093	4288228	1012	28218	19663122	24292694	70.4471	51.8126	1	0	0	0	0	0	0	0	1	0	0	0	0	0	0
2021-08-31	Vietnam	26	2740	7.91608	98.6208	4.59128	173.388	5.15553	37	3.63759	270340	12.5074	25690000	17.0616	97468029	18.395	1	1	2.43923e+06	14.7072	0	0	0	1	0	179	55093	312036	1012	9758	19663122	14006515	70.4471	76.1539	1	0	0	0	0	0	0	0	1	0	0	0	0	0	0
2021-09-06	Brunei	1	2286	7.735	98.8507	4.59361	103.062	4.63533	559	6.32794	3070	8.02976	25690000	17.0616	445373	13.0067	1	1	2.6268e+06	14.7813	0	0	0	1	0	144	107181	4404	1311	33	28035888	0	71.76	76.85	1	0	0	0	0	0	0	0	0	1	0	0	0	1	0
2021-09-07	Canada	2	0	0	98.8507	4.59361	122.696	4.80971	22731	10.0315	56410	10.9404	25690000	17.0616	38246108	17.4596	1	1	2.24219e+06	14.623	0	0	0	1	0	176	107181	124745	1311	930	28035888	2796774	71.76	65.9967	1	0	0	0	0	0	0	0	0	1	0	0	0	0	1
2021-09-08	Chile	3	0	0	98.8507	4.59361	143.776	4.96825		0	34940	10.4614	25690000	17.0616	19493184	16.7856	1	1	2.72558e+06	14.8182	0	0	0	1	0	163	107181	15589	1311	531	28035888	3367698	71.76	58.1473	1	0	0	0	0	0	0	0	0	1	0	0	0	0	0
2021-09-09	China	4	15738	9.6639	98.8507	4.59361	128.96	4.8595	4052	8.30721	705080	13.4661	25690000	17.0616	1412360000	21.0685	1	1	2.36518e+06	14.6764	0	0	0	1	0	18	107181	1663	1311	0	28035888	143863000	71.76	73.2393	1	0	0	0	0	0	0	0	0	1	0	0	0	0	0
2021-09-11	Fiji	5	3666	8.20713	98.8507	4.59361	129.342	4.86246	1941	7.57147	79830	11.2877	25690000	17.0616	924610	13.7371	1	0	3.25977e+06	14.9972	0	1	1	1	0	140	107181	4307	1311	130	28035888	0	71.76	87.6853	1	0	0	0	0	0	0	0	0	1	0	0	0	0	0
2021-09-12	Hong Kong (SAR)	6	55958	10.9324	98.8507	4.59361	134.084	4.89847	9486	9.15768	104760	11.5594	25690000	17.0616	7413100	15.8188	1	1	2.4499e+06	14.7116	0	0	0	1	0	144	107181	106	1311	1	28035888	1088497	71.76	59.26	1	0	0	0	0	0	0	0	0	1	0	0	0	0	0
2021-09-13	India	7	0	0	98.8507	4.59361	194.595	5.27092	3833	8.25166	721050	13.4885	25690000	17.0616	1407563842	21.0651	1	1	2.08445e+06	14.55	0	0	0	1	0	141	107181	955862	1311	9319	28035888	241626067	71.76	64.7017	1	0	0	0	0	0	0	0	0	1	0	0	0	0	0
2021-09-14	Indonesia	8	5109	8.53895	98.8507	4.59361	156.461	5.05281	11400	9.34146	92400	11.4339	25690000	17.0616	273753191	19.4277	1	1	2.66431e+06	14.7955	0	0	0	1	0	142	107181	125303	1311	8916	28035888	43225862	71.76	70.4357	1	0	0	0	0	0	0	0	0	1	0	0	0	0	0
2021-09-15	Japan	9	11706	9.36794	98.8507	4.59361	105.572	4.65939	11572	9.35643	47020	10.7583	25690000	17.0616	125681593	18.6493	1	0	2.52658e+06	14.7424	0	1	1	1	0	3	107181	210700	1311	1584	28035888	33256619	71.76	51.6317	1	0	0	0	0	0	0	0	0	1	0	0	0	0	0
2021-09-16	Korea	10	2872	7.96311	98.8507	4.59361	119.448	4.78288	5604	8.63141	111530	11.6221	25690000	17.0616	25971909	17.0725	0	1	2.44391e+06	14.7091	0	0	0	1	0	141	107181	60328	1311	205	28035888	19768197	71.76	67.257	1	0	0	0	0	0	0	0	0	1	0	0	0	0	0
2021-09-17	Malaysia	11	3828	8.25036	98.8507	4.59361	122.78	4.81039	6157	8.72551	177460	12.0865	25690000	17.0616	33573874	17.3293	1	1	2.52051e+06	14.74	0	0	0	1	0	144	107181	499441	1311	9671	28035888	9400997	71.76	67.257	1	0	0	0	0	0	0	0	0	1	0	0	0	0	0
2021-09-18	Mauritius	12	0	0	98.8507	4.59361	140.004	4.94167		0	30150	10.314	25690000	17.0616	1266060	14.0514	1	0	2.24274e+06	14.6232	0	1	1	1	0	176	107181	5019	1311	53	28035888	0	71.76	46.4693	1	0	0	0	0	0	0	0	0	1	0	0	0	0	0
2021-09-21	New Zealand	13	6293	8.74735	98.8507	4.59361	1	0	85769	11.3594	574470	13.2612	25690000	17.0616	5122600	15.4492	1	0	3.33103e+06	15.0188	0	1	1	1	0	179	107181	722	1311	0	28035888	1711835	71.76	87.286	1	0	0	0	0	0	0	0	0	1	0	0	0	0	0
2021-09-23	Philippines	14	1344	7.20415	98.8507	4.59361	138.39	4.93008	4249	8.35467	310050	12.6445	25690000	17.0616	113880328	18.5507	1	0	2.62019e+06	14.7788	0	1	1	1	0	140	107181	560109	1311	4846	28035888	4554029	71.76	77.4213	1	0	0	0	0	0	0	0	0	1	0	0	0	0	0
2021-09-24	Qatar	15	45729	10.7305	98.8507	4.59361	115.394	4.74836		0	2010	7.60639	25690000	17.0616	2688235	14.8044	1	1	1.80914e+06	14.4084	0	0	0	1	0	154	107181	3899	1311	4	28035888	604328	71.76	53.7633	1	0	0	0	0	0	0	0	0	1	0	0	0	0	0
2021-09-25	Singapore	16	206504	12.2381	98.8507	4.59361	117.446	4.76597	10148	9.22513	60390	11.0086	25690000	17.0616	5453566	15.5118	1	1	2.54598e+06	14.75	0	0	0	1	0	144	107181	28901	1311	40	28035888	643381	71.76	45.7217	1	0	0	0	0	0	0	0	0	1	0	0	0	0	0
2021-09-26	Solomon Islands	17	952	6.85961	98.8507	4.59361	135.877	4.91175	271	5.6058	2800	7.93773	25690000	17.0616	707851	13.47	1	0	3.10584e+06	14.9488	0	1	1	1	0	140	107181	0	1311	0	28035888	0	71.76	32.5943	1	0	0	0	0	0	0	0	0	1	0	0	0	0	0
2021-09-27	South Africa	18	0	0	98.8507	4.59361	173.64	5.15699	5771	8.66077	200240	12.2073	25690000	17.0616	59392255	17.8997	1	1	2.18742e+06	14.5982	0	0	0	1	0	140	107181	125013	1311	5365	28035888	2697226	71.76	45.589	1	0	0	0	0	0	0	0	0	1	0	0	0	0	0
2021-09-28	Sri Lanka	19	8742	9.07601	98.8507	4.59361	177.021	5.17627	474	6.16331	146950	11.8979	25690000	17.0616	22156000	16.9136	1	0	2.21538e+06	14.6109	0	1	1	1	0	141	107181	77075	1311	3721	28035888	6106228	71.76	80.56	1	0	0	0	0	0	0	0	0	1	0	0	0	0	0
2021-09-29	Taiwan	20	3644	8.20111	98.8507	4.59361	194550	12.1784		0	5090	8.53523	25690000	17.0616	23665024	16.9795	1	0	2.49793e+06	14.731	0	1	1	1	0	18	107181	228	1311	7	28035888	4101789	71.76	49.07	1	0	0	0	0	0	0	0	0	1	0	0	0	0	0
2021-09-30	Thailand	21	5568	8.62497	98.8507	4.59361	114.639	4.74179	1470	7.2937	83450	11.332	25690000	17.0616	71601103	18.0866	0	1	2.38719e+06	14.6856	0	0	0	1	0	140	107181	398745	1311	5138	28035888	13423015	71.76	55.09	1	0	0	0	0	0	0	0	0	1	0	0	0	0	0
2021-09-30	Tonga	22	0	0	98.8507	4.59361	136.273	4.91466		0	15450	9.64543	25690000	17.0616	106017	11.5714	1	0	3.29898e+06	15.0091	0	1	1	1	0	140	107181	0	1311	0	28035888	0	71.76	43.52	1	0	0	0	0	0	0	0	0	1	0	0	0	0	0
2021-09-30	UK	23	0	0	98.8507	4.59361	1	0	155078	11.9517	1172490	13.9746	25690000	17.0616	9365145	16.0525	1	1	1.83975e+06	14.4251	0	0	1	1	0	154	107181	1017455	1311	4378	28035888	3635629	71.76	42.034	1	0	0	0	0	0	0	0	0	1	0	0	0	0	0
2021-09-30	United Arab Emirates	24	58160	10.971	98.8507	4.59361	124.727	4.82613		0	13550	9.51422	25690000	17.0616	67326569	18.0251	1	1	1.69913e+06	14.3456	0	1	0	1	0	140	107181	17622	1311	56	28035888	1599258	71.76	52.3817	1	0	0	0	0	0	0	0	0	1	0	0	0	0	0
2021-09-30	USA	25	46088	10.7383	98.8507	4.59361	125.798	4.83468	96235	11.4746	110160	11.6097	25690000	17.0616	331893745	19.6203	1	1	2.35545e+06	14.6722	0	0	0	1	0	156	107181	4145207	1311	59124	28035888	22707971	71.76	52.3817	1	0	0	0	0	0	0	0	0	1	0	0	0	0	0
2021-09-30	Vietnam	26	2466	7.81076	98.8507	4.59361	172.321	5.14936	37	3.63759	270340	12.5074	25690000	17.0616	97468029	18.395	1	1	2.43923e+06	14.7072	0	0	0	1	0	179	107181	328659	1311	8237	28035888	22677776	71.76	140.666	1	0	0	0	0	0	0	0	0	1	0	0	0	0	0
2021-10-08	Brunei	1	2032	7.61727	99.2396	4.59754	103.173	4.63641	559	6.32794	3070	8.02976	25690000	17.0616	445373	13.0067	1	1	2.6268e+06	14.7813	0	0	0	1	0	144	172030	6014	1743	46	35603091	8678	70.5074	76.85	1	0	0	0	0	0	0	0	0	0	1	0	0	1	0
2021-10-09	Canada	2	0	0	99.2396	4.59754	123.555	4.81668	22731	10.0315	56410	10.9404	25690000	17.0616	38246108	17.4596	1	1	2.24219e+06	14.623	0	0	0	1	0	176	172030	91140	1743	1107	35603091	2378604	70.5074	63.7965	1	0	0	0	0	0	0	0	0	0	1	0	0	0	1
2021-10-10	Chile	3	741	6.60935	99.2396	4.59754	145.698	4.98153		0	34940	10.4614	25690000	17.0616	19493184	16.7856	1	1	2.72558e+06	14.8182	0	0	0	1	0	163	172030	40784	1743	502	35603091	4516431	70.5074	44.1503	1	0	0	0	0	0	0	0	0	0	1	0	0	0	0
2021-10-11	China	4	15494	9.64827	99.2396	4.59754	129.858	4.86644	4052	8.30721	705080	13.4661	25690000	17.0616	1412360000	21.0685	1	1	2.36518e+06	14.6764	0	0	0	1	0	18	172030	1535	1743	0	35603091	62620000	70.5074	74.0584	1	0	0	0	0	0	0	0	0	0	1	0	0	0	0
2021-10-13	Fiji	5	4600	8.43403	99.2396	4.59754	128.309	4.85444	1941	7.57147	79830	11.2877	25690000	17.0616	924610	13.7371	1	0	3.25977e+06	14.9972	0	1	1	1	0	140	172030	1118	1743	50	35603091	0	70.5074	89.2797	1	0	0	0	0	0	0	0	0	0	1	0	0	0	0
2021-10-14	Hong Kong (SAR)	6	61688	11.0299	99.2396	4.59754	137.869	4.9263	9486	9.15768	104760	11.5594	25690000	17.0616	7413100	15.8188	1	1	2.4499e+06	14.7116	0	0	0	1	0	144	172030	152	1743	0	35603091	355185	70.5074	58.2148	1	0	0	0	0	0	0	0	0	0	1	0	0	0	0
2021-10-15	India	7	0	0	99.2396	4.59754	197.337	5.28491	3833	8.25166	721050	13.4885	25690000	17.0616	1407563842	21.0651	1	1	2.08445e+06	14.55	0	0	0	1	0	141	172030	519107	1743	10098	35603091	176206059	70.5074	59.4674	1	0	0	0	0	0	0	0	0	0	1	0	0	0	0
2021-10-16	Indonesia	8	3310	8.10501	99.2396	4.59754	156.652	5.05403	11400	9.34146	92400	11.4339	25690000	17.0616	273753191	19.4277	1	1	2.66431e+06	14.7955	0	0	0	1	0	142	172030	29254	1743	1466	35603091	51168870	70.5074	61.9368	1	0	0	0	0	0	0	0	0	0	1	0	0	0	0
2021-10-17	Japan	9	11554	9.35487	99.2396	4.59754	105.361	4.65739	11572	9.35643	47020	10.7583	25690000	17.0616	125681593	18.6493	1	0	2.52658e+06	14.7424	0	1	1	1	0	3	172030	17271	1743	615	35603091	23588778	70.5074	47.22	1	0	0	0	0	0	0	0	0	0	1	0	0	0	0
2021-10-18	Korea	10	1788	7.48941	99.2396	4.59754	119.656	4.78462	5604	8.63141	111530	11.6221	25690000	17.0616	25971909	17.0725	0	1	2.44391e+06	14.7091	0	0	0	1	0	141	172030	52613	1743	361	35603091	14774691	70.5074	62.4952	1	0	0	0	0	0	0	0	0	0	1	0	0	0	0
2021-10-19	Malaysia	11	4920	8.50127	99.2396	4.59754	123.679	4.81769	6157	8.72551	177460	12.0865	25690000	17.0616	33573874	17.3293	1	1	2.52051e+06	14.74	0	0	0	1	0	144	172030	225947	1743	2577	35603091	5725254	70.5074	62.4952	1	0	0	0	0	0	0	0	0	0	1	0	0	0	0
2021-10-20	Mauritius	12	0	0	99.2396	4.59754	140.756	4.94703		0	30150	10.314	25690000	17.0616	1266060	14.0514	1	0	2.24274e+06	14.6232	0	1	1	1	0	176	172030	7157	1743	92	35603091	0	70.5074	36.4971	1	0	0	0	0	0	0	0	0	0	1	0	0	0	0
2021-10-23	New Zealand	13	8460	9.04322	99.2396	4.59754	1	0	85769	11.3594	574470	13.2612	25690000	17.0616	5122600	15.4492	1	0	3.33103e+06	15.0188	0	1	1	1	0	179	172030	2303	1743	2	35603091	1646462	70.5074	81.02	1	0	0	0	0	0	0	0	0	0	1	0	0	0	0
2021-10-25	Philippines	14	2352	7.76345	99.2396	4.59754	138.643	4.9319	4249	8.35467	310050	12.6445	25690000	17.0616	113880328	18.5507	1	0	2.62019e+06	14.7788	0	1	1	1	0	140	172030	237310	1743	4878	35603091	8990378	70.5074	76.5806	1	0	0	0	0	0	0	0	0	0	1	0	0	0	0
2021-10-26	Qatar	15	44262	10.6979	99.2396	4.59754	116.943	4.76169		0	2010	7.60639	25690000	17.0616	2688235	14.8044	1	1	1.80914e+06	14.4084	0	0	0	1	0	154	172030	2604	1743	4	35603091	149336	70.5074	51.97	1	0	0	0	0	0	0	0	0	0	1	0	0	0	0
2021-10-27	Singapore	16	228110	12.3376	99.2396	4.59754	117.781	4.76882	10148	9.22513	60390	11.0086	25690000	17.0616	5453566	15.5118	1	1	2.54598e+06	14.75	0	0	0	1	0	144	172030	101853	1743	312	35603091	930611	70.5074	46.1584	1	0	0	0	0	0	0	0	0	0	1	0	0	0	0
2021-10-28	Solomon Islands	17	952	6.85961	99.2396	4.59754	136.131	4.91362	271	5.6058	2800	7.93773	25690000	17.0616	707851	13.47	1	0	3.10584e+06	14.9488	0	1	1	1	0	140	172030	0	1743	0	35603091	0	70.5074	27.78	1	0	0	0	0	0	0	0	0	0	1	0	0	0	0
2021-10-29	South Africa	18	0	0	99.2396	4.59754	174.168	5.16002	5771	8.66077	200240	12.2073	25690000	17.0616	59392255	17.8997	1	1	2.18742e+06	14.5982	0	0	0	1	0	140	172030	19444	1743	1551	35603091	243664	70.5074	43.7081	1	0	0	0	0	0	0	0	0	0	1	0	0	0	0
2021-10-30	Sri Lanka	19	10204	9.23063	99.2396	4.59754	180.742	5.19707	474	6.16331	146950	11.8979	25690000	17.0616	22156000	16.9136	1	0	2.21538e+06	14.6109	0	1	1	1	0	141	172030	23696	1743	837	35603091	2348353	70.5074	66.6448	1	0	0	0	0	0	0	0	0	0	1	0	0	0	0
2021-10-31	Taiwan	20	1216	7.10414	99.2396	4.59754	207602	12.2434		0	5090	8.53523	25690000	17.0616	23665024	16.9795	1	0	2.49793e+06	14.731	0	1	1	1	0	18	172030	189	1743	5	35603091	7008118	70.5074	46.6835	1	0	0	0	0	0	0	0	0	0	1	0	0	0	0
2021-10-30	Thailand	21	6264	8.74273	99.2396	4.59754	115.488	4.74917	1470	7.2937	83450	11.332	25690000	17.0616	71601103	18.0866	0	1	2.38719e+06	14.6856	0	0	0	1	0	140	172030	308550	1743	2478	35603091	19468115	70.5074	57.4216	1	0	0	0	0	0	0	0	0	0	1	0	0	0	0
2021-10-30	Tonga	22	0	0	99.2396	4.59754	136.917	4.91937		0	15450	9.64543	25690000	17.0616	106017	11.5714	1	0	3.29898e+06	15.0091	0	1	1	1	0	140	172030	1	1743	0	35603091	0	70.5074	43.52	1	0	0	0	0	0	0	0	0	0	1	0	0	0	0
2021-10-30	UK	23	0	0	98.8507	4.59361	1	0	155078	11.9517	1172490	13.9746	25690000	17.0616	9365145	16.0525	1	1	1.83975e+06	14.4251	0	0	1	1	0	154	172030	1250593	1743	4555	35603091	9181381	70.5074	42.4558	1	0	0	0	0	0	0	0	0	0	1	0	0	0	0
2021-10-30	United Arab Emirates	24	61266	11.023	99.2396	4.59754	125.837	4.83499		0	13550	9.51422	25690000	17.0616	67326569	18.0251	1	1	1.69913e+06	14.3456	0	1	0	1	0	140	172030	3913	1743	39	35603091	860864	70.5074	52.2229	1	0	0	0	0	0	0	0	0	0	1	0	0	0	0
2021-10-30	USA	25	41206	10.6264	99.2396	4.59754	126.843	4.84295	96235	11.4746	110160	11.6097	25690000	17.0616	331893745	19.6203	1	1	2.35545e+06	14.6722	0	0	0	1	0	156	172030	2514025	1743	48031	35603091	29324738	70.5074	52.2229	1	0	0	0	0	0	0	0	0	0	1	0	0	0	0
2021-10-30	Vietnam	26	3325	8.10953	99.2396	4.59754	171.971	5.14733	37	3.63759	270340	12.5074	25690000	17.0616	97468029	18.395	1	1	2.43923e+06	14.7072	0	0	0	1	0	179	172030	130367	1743	2782	35603091	25999970	70.5074	65.9039	1	0	0	0	0	0	0	0	0	0	1	0	0	0	0
2021-11-09	Brunei	1	3048	8.02257	99.6763	4.60193	103.443	4.63902	559	6.32794	3070	8.02976	25690000	17.0616	445373	13.0067	1	1	2.6268e+06	14.7813	0	0	0	1	0	144	211655	1928	2011	9	39282954	112227	66.3093	76.85	1	0	0	0	0	0	0	0	0	0	0	1	0	1	0
2021-11-10	Canada	2	0	0	99.6763	4.60193	123.812	4.81877	22731	10.0315	56410	10.9404	25690000	17.0616	38246108	17.4596	1	1	2.24219e+06	14.623	0	0	0	1	0	176	211655	78029	2011	718	39282954	2021051	66.3093	64.6613	1	0	0	0	0	0	0	0	0	0	0	1	0	0	1
2021-11-11	Chile	3	0	0	99.6763	4.60193	146.433	4.98657		0	34940	10.4614	25690000	17.0616	19493184	16.7856	1	1	2.72558e+06	14.8182	0	0	0	1	0	163	211655	67703	2011	589	39282954	4119719	66.3093	39.103	1	0	0	0	0	0	0	0	0	0	0	1	0	0	0
2021-11-12	China	4	15328	9.6375	99.6763	4.60193	130.37	4.87038	4052	8.30721	705080	13.4661	25690000	17.0616	1412360000	21.0685	1	1	2.36518e+06	14.6764	0	0	0	1	0	18	211655	2152	2011	0	39282954	233903000	66.3093	68.055	1	0	0	0	0	0	0	0	0	0	0	1	0	0	0
2021-11-14	Fiji	5	13953	9.54352	99.6763	4.60193	128.309	4.85444	1941	7.57147	79830	11.2877	25690000	17.0616	924610	13.7371	1	0	3.25977e+06	14.9972	0	1	1	1	0	140	211655	365	2011	22	39282954	0	66.3093	89.2233	1	0	0	0	0	0	0	0	0	0	0	1	0	0	0
2021-11-15	Hong Kong (SAR)	6	74126	11.2135	99.6763	4.60193	138.139	4.92826	9486	9.15768	104760	11.5594	25690000	17.0616	7413100	15.8188	1	1	2.4499e+06	14.7116	0	0	0	1	0	144	211655	90	2011	0	39282954	413870	66.3093	52.8727	1	0	0	0	0	0	0	0	0	0	0	1	0	0	0
2021-11-16	India	7	3072	8.03041	99.6763	4.60193	198.768	5.29214	3833	8.25166	721050	13.4885	25690000	17.0616	1407563842	21.0651	1	1	2.08445e+06	14.55	0	0	0	1	0	141	211655	310962	2011	10810	39282954	174423791	66.3093	52.6073	1	0	0	0	0	0	0	0	0	0	0	1	0	0	0
2021-11-17	Indonesia	8	3144	8.05357	99.6763	4.60193	157.225	5.05768	11400	9.34146	92400	11.4339	25690000	17.0616	273753191	19.4277	1	1	2.66431e+06	14.7955	0	0	0	1	0	142	211655	12051	2011	425	39282954	41478075	66.3093	60.6943	1	0	0	0	0	0	0	0	0	0	0	1	0	0	0
2021-11-18	Japan	9	17010	9.74162	99.6763	4.60193	105.572	4.65939	11572	9.35643	47020	10.7583	25690000	17.0616	125681593	18.6493	1	0	2.52658e+06	14.7424	0	1	1	1	0	3	211655	4293	2011	93	39282954	6193985	66.3093	47.22	1	0	0	0	0	0	0	0	0	0	0	1	0	0	0
2021-11-19	Korea	10	3504	8.16195	99.6763	4.60193	120.258	4.78964	5604	8.63141	111530	11.6221	25690000	17.0616	25971909	17.0725	0	1	2.44391e+06	14.7091	0	0	0	1	0	141	211655	85964	2011	801	39282954	6891224	66.3093	53.8823	1	0	0	0	0	0	0	0	0	0	0	1	0	0	0
2021-11-20	Malaysia	11	8150	9.0059	99.6763	4.60193	123.979	4.82011	6157	8.72551	177460	12.0865	25690000	17.0616	33573874	17.3293	1	1	2.52051e+06	14.74	0	0	0	1	0	144	211655	161140	2011	1513	39282954	3014561	66.3093	53.8823	1	0	0	0	0	0	0	0	0	0	0	1	0	0	0
2021-11-21	Mauritius	12	0	0	99.6763	4.60193	141.759	4.95413		0	30150	10.314	25690000	17.0616	1266060	14.0514	1	0	2.24274e+06	14.6232	0	1	1	1	0	176	211655	32782	2011	351	39282954	35153	66.3093	39.016	1	0	0	0	0	0	0	0	0	0	0	1	0	0	0
2021-11-24	New Zealand	13	14624	9.59049	99.6763	4.60193	1	0	85769	11.3594	574470	13.2612	25690000	17.0616	5122600	15.4492	1	0	3.33103e+06	15.0188	0	1	1	1	0	179	211655	5129	2011	10	39282954	708693	66.3093	80.8187	1	0	0	0	0	0	0	0	0	0	0	1	0	0	0
2021-11-26	Philippines	14	4368	8.38229	99.6763	4.60193	139.53	4.93828	4249	8.35467	310050	12.6445	25690000	17.0616	113880328	18.5507	1	0	2.62019e+06	14.7788	0	1	1	1	0	140	211655	45458	2011	5373	39282954	10881418	66.3093	70.208	1	0	0	0	0	0	0	0	0	0	0	1	0	0	0
2021-11-27	Qatar	15	43959	10.691	99.6763	4.60193	118.19	4.77229		0	2010	7.60639	25690000	17.0616	2688235	14.8044	1	1	1.80914e+06	14.4084	0	0	0	1	0	154	211655	4200	2011	1	39282954	114249	66.3093	53.7513	1	0	0	0	0	0	0	0	0	0	0	1	0	0	0
2021-11-28	Singapore	16	235220	12.3683	99.6763	4.60193	118.935	4.77858	10148	9.22513	60390	11.0086	25690000	17.0616	5453566	15.5118	1	1	2.54598e+06	14.75	0	0	0	1	0	144	211655	66351	2011	311	39282954	800023	66.3093	44.2843	1	0	0	0	0	0	0	0	0	0	0	1	0	0	0
2021-11-29	Solomon Islands	17	952	6.85961	99.6763	4.60193	136.004	4.91268	271	5.6058	2800	7.93773	25690000	17.0616	707851	13.47	1	0	3.10584e+06	14.9488	0	1	1	1	0	140	211655	0	2011	0	39282954	0	66.3093	22.595	1	0	0	0	0	0	0	0	0	0	0	1	0	0	0
2021-11-30	South Africa	18	0	0	99.6763	4.60193	174.872	5.16405	5771	8.66077	200240	12.2073	25690000	17.0616	59392255	17.8997	1	1	2.18742e+06	14.5982	0	0	0	1	0	140	211655	27350	2011	666	39282954	1994351	66.3093	42.192	1	0	0	0	0	0	0	0	0	0	0	1	0	0	0
2021-11-27	Sri Lanka	19	14868	9.60703	99.6763	4.60193	186.383	5.2278	474	6.16331	146950	11.8979	25690000	17.0616	22156000	16.9136	1	0	2.21538e+06	14.6109	0	1	1	1	0	141	211655	22916	2011	603	39282954	444616	66.3093	53.2563	1	0	0	0	0	0	0	0	0	0	0	1	0	0	0
2021-11-27	Taiwan	20	2142	7.66996	99.6763	4.60193	207602	12.2434		0	5090	8.53523	25690000	17.0616	23665024	16.9795	1	0	2.49793e+06	14.731	0	1	1	1	0	18	211655	189	2011	1	39282954	5420053	66.3093	24.538	1	0	0	0	0	0	0	0	0	0	0	1	0	0	0
2021-11-27	Thailand	21	11832	9.37865	99.6763	4.60193	115.817	4.75201	1470	7.2937	83450	11.332	25690000	17.0616	71601103	18.0866	0	1	2.38719e+06	14.6856	0	0	0	1	0	140	211655	203848	2011	1566	39282954	15530733	66.3093	54.7817	1	0	0	0	0	0	0	0	0	0	0	1	0	0	0
2021-11-27	Tonga	22	0	0	99.6763	4.60193	138.718	4.93244		0	15450	9.64543	25690000	17.0616	106017	11.5714	1	0	3.29898e+06	15.0091	0	1	1	1	0	140	211655	0	2011	0	39282954	0	66.3093	55.415	1	0	0	0	0	0	0	0	0	0	0	1	0	0	0
2021-11-27	UK	23	17272	9.7569	99.6763	4.60193	1	0	155078	11.9517	1172490	13.9746	25690000	17.0616	9365145	16.0525	1	1	1.83975e+06	14.4251	0	0	1	1	0	154	211655	1171143	2011	4486	39282954	12186782	66.3093	43.6013	1	0	0	0	0	0	0	0	0	0	0	1	0	0	0
2021-11-27	United Arab Emirates	24	73434	11.2042	99.6763	4.60193	126.614	4.84114		0	13550	9.51422	25690000	17.0616	67326569	18.0251	1	1	1.69913e+06	14.3456	0	1	0	1	0	140	211655	2136	2011	11	39282954	649882	66.3093	51.4777	1	0	0	0	0	0	0	0	0	0	0	1	0	0	0
2021-11-27	USA	25	54738	10.9103	99.6763	4.60193	127.467	4.84785	96235	11.4746	110160	11.6097	25690000	17.0616	331893745	19.6203	1	1	2.35545e+06	14.6722	0	0	0	1	0	156	211655	2552780	2011	34602	39282954	42212239	66.3093	51.4777	1	0	0	0	0	0	0	0	0	0	0	1	0	0	0
2021-11-27	Vietnam	26	3139	8.05198	99.6763	4.60193	172.523	5.15053	37	3.63759	270340	12.5074	25690000	17.0616	97468029	18.395	1	1	2.43923e+06	14.7072	0	0	0	1	0	179	211655	316960	2011	3169	39282954	28697044	66.3093	69.5683	1	0	0	0	0	0	0	0	0	0	0	1	0	0	0
2021-12-11	Brunei	1	4572	8.42792	100.06	4.60577	103.64	4.64093	559	6.32794	3070	8.02976	25690000	17.0616	445373	13.0067	1	1	2.6268e+06	14.7813	0	0	0	1	0	144	425496	430	2253	1	42580539	39328	58.5816	62.0377	1	0	0	0	0	0	0	0	0	0	0	0	1	1	0
2021-12-12	Canada	2	7117	8.87038	100.06	4.60577	123.641	4.81738	22731	10.0315	56410	10.9404	25690000	17.0616	38246108	17.4596	1	1	2.24219e+06	14.623	0	0	0	1	0	176	425496	425540	2253	632	42580539	8063595	58.5816	61.8494	1	0	0	0	0	0	0	0	0	0	0	0	1	0	1
2021-12-13	Chile	3	0	0	100.06	4.60577	147.568	4.99429		0	34940	10.4614	25690000	17.0616	19493184	16.7856	1	1	2.72558e+06	14.8182	0	0	0	1	0	163	425496	43743	2253	769	42580539	3246133	58.5816	38.7003	1	0	0	0	0	0	0	0	0	0	0	0	1	0	0
2021-12-14	China	4	18920	9.84803	100.06	4.60577	129.986	4.86743	4052	8.30721	705080	13.4661	25690000	17.0616	1412360000	21.0685	1	1	2.36518e+06	14.6764	0	0	0	1	0	18	425496	4043	2253	0	42580539	327357000	58.5816	73.2513	1	0	0	0	0	0	0	0	0	0	0	0	1	0	0
2021-12-16	Fiji	5	67347	11.1176	100.06	4.60577	130.49	4.87129	1941	7.57147	79830	11.2877	25690000	17.0616	924610	13.7371	1	0	3.25977e+06	14.9972	0	1	1	1	0	140	425496	826	2253	2	42580539	0	58.5816	86.989	1	0	0	0	0	0	0	0	0	0	0	0	1	0	0
2021-12-17	Hong Kong (SAR)	6	73720	11.208	100.06	4.60577	138.139	4.92826	9486	9.15768	104760	11.5594	25690000	17.0616	7413100	15.8188	1	1	2.4499e+06	14.7116	0	0	0	1	0	144	425496	213	2253	0	42580539	467847	58.5816	55.56	1	0	0	0	0	0	0	0	0	0	0	0	1	0	0
2021-12-18	India	7	22754	10.0325	100.06	4.60577	198.052	5.28853	3833	8.25166	721050	13.4885	25690000	17.0616	1407563842	21.0651	1	1	2.08445e+06	14.55	0	0	0	1	0	141	425496	264803	2253	12239	42580539	211810280	58.5816	57.5081	1	0	0	0	0	0	0	0	0	0	0	0	1	0	0
2021-12-19	Indonesia	8	6693	8.80897	100.06	4.60577	158.121	5.06336	11400	9.34146	92400	11.4339	25690000	17.0616	273753191	19.4277	1	1	2.66431e+06	14.7955	0	0	0	1	0	142	425496	6311	2253	264	42580539	39909878	58.5816	64.2626	1	0	0	0	0	0	0	0	0	0	0	0	1	0	0
2021-12-20	Japan	9	17780	9.78589	100.06	4.60577	105.572	4.65939	11572	9.35643	47020	10.7583	25690000	17.0616	125681593	18.6493	1	0	2.52658e+06	14.7424	0	1	1	1	0	3	425496	5660	2253	32	42580539	2310146	58.5816	47.22	1	0	0	0	0	0	0	0	0	0	0	0	1	0	0
2021-12-21	Korea	10	6710	8.8115	100.06	4.60577	120.455	4.79127	5604	8.63141	111530	11.6221	25690000	17.0616	25971909	17.0725	0	1	2.44391e+06	14.7091	0	0	0	1	0	141	425496	182903	2253	1966	42580539	18273365	58.5816	53.2623	1	0	0	0	0	0	0	0	0	0	0	0	1	0	0
2021-12-22	Malaysia	11	15457	9.64588	100.06	4.60577	124.479	4.82414	6157	8.72551	177460	12.0865	25690000	17.0616	33573874	17.3293	1	1	2.52051e+06	14.74	0	0	0	1	0	144	425496	125304	2253	1062	42580539	4123880	58.5816	53.2623	1	0	0	0	0	0	0	0	0	0	0	0	1	0	0
2021-12-23	Mauritius	12	0	0	100.06	4.60577	142.009	4.95589		0	30150	10.314	25690000	17.0616	1266060	14.0514	1	0	2.24274e+06	14.6232	0	1	1	1	0	176	425496	12988	2253	259	42580539	0	58.5816	41.8306	1	0	0	0	0	0	0	0	0	0	0	0	1	0	0
2021-12-26	New Zealand	13	33849	10.4297	100.06	4.60577	1	0	85769	11.3594	574470	13.2612	25690000	17.0616	5122600	15.4492	1	0	3.33103e+06	15.0188	0	1	1	1	0	179	425496	2395	2253	7	42580539	602183	58.5816	58.9884	1	0	0	0	0	0	0	0	0	0	0	0	1	0	0
2021-12-28	Philippines	14	8400	9.03611	100.06	4.60577	139.909	4.941	4249	8.35467	310050	12.6445	25690000	17.0616	113880328	18.5507	1	0	2.62019e+06	14.7788	0	1	1	1	0	140	425496	11256	2253	2959	42580539	10203273	58.5816	66.0687	1	0	0	0	0	0	0	0	0	0	0	0	1	0	0
2021-12-29	Qatar	15	64612	11.0762	100.06	4.60577	118.958	4.77877		0	2010	7.60639	25690000	17.0616	2688235	14.8044	1	1	1.80914e+06	14.4084	0	0	0	1	0	154	425496	7081	2253	7	42580539	96987	58.5816	52.46	1	0	0	0	0	0	0	0	0	0	0	0	1	0	0
2021-12-30	Singapore	16	281788	12.5489	100.06	4.60577	119.484	4.78318	10148	9.22513	60390	11.0086	25690000	17.0616	5453566	15.5118	1	1	2.54598e+06	14.75	0	0	0	1	0	144	425496	14680	2253	110	42580539	915173	58.5816	42.7887	1	0	0	0	0	0	0	0	0	0	0	0	1	0	0
2021-12-31	Solomon Islands	17	1496	7.31122	100.06	4.60577	136.511	4.9164	271	5.6058	2800	7.93773	25690000	17.0616	707851	13.47	1	0	3.10584e+06	14.9488	0	1	1	1	0	140	425496	4	2253	0	42580539	0	58.5816	22.22	1	0	0	0	0	0	0	0	0	0	0	0	1	0	0
2021-12-29	South Africa	18	0	0	100.06	4.60577	175.927	5.17007	5771	8.66077	200240	12.2073	25690000	17.0616	59392255	17.8997	1	1	2.18742e+06	14.5982	0	0	0	1	0	140	425496	490234	2253	1302	42580539	1453538	58.5816	45.0916	1	0	0	0	0	0	0	0	0	0	0	0	1	0	0
2021-12-29	Sri Lanka	19	17774	9.78555	100.06	4.60577	193.223	5.26385	474	6.16331	146950	11.8979	25690000	17.0616	22156000	16.9136	1	0	2.21538e+06	14.6109	0	1	1	1	0	141	425496	23256	2253	633	42580539	4037490	58.5816	55.1155	1	0	0	0	0	0	0	0	0	0	0	0	1	0	0
2021-12-29	Taiwan	20	4888	8.49474	100.06	4.60577	207602	12.2434		0	5090	8.53523	25690000	17.0616	23665024	16.9795	1	0	2.49793e+06	14.731	0	1	1	1	0	18	425496	428	2253	2	42580539	2582659	58.5816	20.37	1	0	0	0	0	0	0	0	0	0	0	0	1	0	0
2021-12-29	Thailand	21	28857	10.2701	100.06	4.60577	115.375	4.74819	1470	7.2937	83450	11.332	25690000	17.0616	71601103	18.0866	0	1	2.38719e+06	14.6856	0	0	0	1	0	140	425496	107563	2253	927	42580539	10577788	58.5816	43.1	1	0	0	0	0	0	0	0	0	0	0	0	1	0	0
2021-12-29	Tonga	22	0	0	100.06	4.60577	141.806	4.95446		0	15450	9.64543	25690000	17.0616	106017	11.5714	1	0	3.29898e+06	15.0091	0	1	1	1	0	140	425496	0	2253	0	42580539	0	58.5816	47.5787	1	0	0	0	0	0	0	0	0	0	0	0	1	0	0
2021-12-29	UK	23	34666	10.4535	100.06	4.60577	1	0	155078	11.9517	1172490	13.9746	25690000	17.0616	9365145	16.0525	1	1	1.83975e+06	14.4251	0	0	1	1	0	154	425496	2709114	2253	4065	42580539	17311130	58.5816	42.7329	1	0	0	0	0	0	0	0	0	0	0	0	1	0	0
2021-12-29	United Arab Emirates	24	97414	11.4867	100.06	4.60577	127.279	4.84639		0	13550	9.51422	25690000	17.0616	67326569	18.0251	1	1	1.69913e+06	14.3456	0	1	0	1	0	140	425496	19896	2253	17	42580539	287958	58.5816	48.841	1	0	0	0	0	0	0	0	0	0	0	0	1	0	0
2021-12-29	USA	25	75496	11.2318	100.06	4.60577	127.858	4.85092	96235	11.4746	110160	11.6097	2.569e+07	17.0616	331893745	19.6203	1	1	2.35545e+06	14.6722	0	0	0	1	0	156	425496	6301561	2253	46044	42580539	46344052	58.5816	48.841	1	0	0	0	0	0	0	0	0	0	0	0	1	0	0
2021-12-29	Vietnam	26	7146	8.87445	100.06	4.60577	172.21	5.14871	37	3.63759	270340	12.5074	2.569e+07	17.0616	97468029	18.395	1	1	2.43923e+06	14.7072	0	0	0	1	0	179	425496	493175	2253	7142	42580539	11273507	58.5816	69.8435	1	0	0	0	0	0	0	0	0	0	0	0	1	0	0
2022-01-12	Brunei	1	4064	8.31017	100.358	4.60874	104.798	4.65203	37887	10.5424	212692	12.2676	25970000	17.0725	449002	13.0148	1	1	2.6268e+06	14.7813	0	0	0	1	0	144	2580386	1006	3835	0	49866290	0	51.6871	50.4823	1	1	0	0	0	0	0	0	0	0	0	0	0	1	0
2022-01-13	Canada	2	14332	9.57032	100.358	4.60874	124.757	4.82637	1002785	13.8183	3380020	15.0334	25970000	17.0725	39292355	17.4865	1	1	2.24219e+06	14.623	0	0	0	1	0	176	2580386	849919	3835	3550	49866290	9222325	51.6871	71.2045	1	1	0	0	0	0	0	0	0	0	0	0	0	0	1
2022-01-14	Chile	3	0	0	100.358	4.60874	149.349	5.00628	50137	10.8225	2011682	14.5145	25970000	17.0725	19603733	16.7912	1	1	2.72558e+06	14.8182	0	0	0	1	0	163	2580386	359490	3835	606	49866290	2397921	51.6871	29.8645	1	1	0	0	0	0	0	0	0	0	0	0	0	0	0
2022-01-15	China	4	13808	9.53308	100.358	4.60874	130.627	4.87234	538935	13.1974	34639116	17.3605	25970000	17.0725	1410000000	21.0669	1	1	2.36518e+06	14.6764	0	0	0	1	0	18	2580386	4901	3835	0	49866290	165200000	51.6871	75.3455	1	1	0	0	0	0	0	0	0	0	0	0	0	0	0
2022-01-17	Fiji	5	81667	11.3104	100.358	4.60874	132.326	4.88527	86969	11.3733	4727946	15.369	25970000	17.0725	929766	13.7427	1	0	3.25977e+06	14.9972	0	1	1	1	0	140	2580386	9523	3835	103	49866290	0	51.6871	76.3945	1	1	0	0	0	0	0	0	0	0	0	0	0	0	0
2022-01-18	Hong Kong (SAR)	6	7348	8.90232	100.358	4.60874	138.274	4.92924	374528	12.8334	6382068	15.669	25970000	17.0725	7656732	15.8511	1	1	2.4499e+06	14.7116	0	0	0	1	0	144	2580386	1548	3835	0	49866290	1200127	51.6871	63.2923	1	1	0	0	0	0	0	0	0	0	0	0	0	0	0
2022-01-19	India	7	45939	10.7351	100.358	4.60874	197.575	5.28612	26610	10.1891	30871904	17.2454	25970000	17.0725	1400000000	21.0597	1	1	2.08445e+06	14.55	0	0	0	1	0	141	2580386	6607920	3835	14756	49866290	215920616	51.6871	72.1332	1	1	0	0	0	0	0	0	0	0	0	0	0	0	0
2022-01-20	Indonesia	8	4692	8.45383	100.358	4.60874	159.002	5.06892	450018	13.017	5516814	15.5233	25970000	17.0725	275501339	19.4341	1	1	2.66431e+06	14.7955	0	0	0	1	0	142	2580386	90650	3835	226	49866290	0	51.6871	61.8987	1	1	0	0	0	0	0	0	0	0	0	0	0	0	0
2022-01-21	Japan	9	18040	9.8004	100.358	4.60874	105.783	4.66139	542139	13.2033	3954222	15.1903	25970000	17.0725	125050000	18.6442	1	0	2.52658e+06	14.7424	0	1	1	1	0	3	2580386	1006164	3835	423	49866290	5999414	51.6871	47.22	1	1	0	0	0	0	0	0	0	0	0	0	0	0	0
2022-01-22	Korea	10	9354	9.14367	100.358	4.60874	121.207	4.7975	218275	12.2935	7024094	15.7649	25970000	17.0725	51844834	17.7638	0	1	2.44391e+06	14.7091	0	0	0	1	0	141	2580386	228789	3835	1147	49866290	10647160	51.6871	40.6423	1	1	0	0	0	0	0	0	0	0	0	0	0	0	0
2022-01-23	Malaysia	11	22040	10.0007	100.358	4.60874	124.879	4.82735	219695	12.3	10940782	16.208	25970000	17.0725	33938221	17.3401	1	1	2.52051e+06	14.74	0	0	0	1	0	144	2580386	112672	3835	491	49866290	5877477	51.6871	40.6423	1	1	0	0	0	0	0	0	0	0	0	0	0	0	0
2022-01-24	Mauritius	12	0	0	100.358	4.60874	144.015	4.96992	5882	8.67982	1816769	14.4126	25970000	17.0725	1262523	14.0486	1	0	2.24274e+06	14.6232	0	1	1	1	0	176	2580386	37455	3835	36	49866290	0	51.6871	36.98	1	1	0	0	0	0	0	0	0	0	0	0	0	0	0
2022-01-27	New Zealand	13	40448	10.6078	100.358	4.60874	1	0	2713576	14.8138	39985382	17.504	25970000	17.0725	5127400	15.4501	1	0	3.33103e+06	15.0188	0	1	1	1	0	179	2580386	2502	3835	4	49866290	1275588	51.6871	51.4074	1	1	0	0	0	0	0	0	0	0	0	0	0	0	0
2022-01-29	Philippines	14	5712	8.6505	100.358	4.60874	141.429	4.9518	167043	12.026	16227126	16.6022	25970000	17.0725	115000000	18.5604	1	0	2.62019e+06	14.7788	0	1	1	1	0	140	2580386	716223	3835	2499	49866290	9740148	51.6871	64.0735	1	1	0	0	0	0	0	0	0	0	0	0	0	0	0
2022-01-30	Qatar	15	60738	11.0143	100.358	4.60874	117.805	4.76903	0	0	75068	11.2262	25970000	17.0725	2695122	14.807	1	1	1.80914e+06	14.4084	0	0	0	1	0	154	2580386	88619	3835	27	49866290	171353	51.6871	52.46	1	1	0	0	0	0	0	0	0	0	0	0	0	0	0
2022-01-31	Singapore	16	304723	12.6272	100.358	4.60874	119.522	4.7835	423733	12.9569	4797745	15.3837	25970000	17.0725	5640000	15.5454	1	1	2.54598e+06	14.75	0	0	0	1	0	144	2580386	73406	3835	27	49866290	1244187	51.6871	44.9045	1	1	0	0	0	0	0	0	0	0	0	0	0	0	0
2022-01-19	Solomon Islands	17	680	6.52356	100.358	4.60874	137.777	4.92564	17402	9.7644	160013	11.983	25970000	17.0725	724273	13.4929	1	0	3.10584e+06	14.9488	0	1	1	1	0	140	2580386	1162	3835	9	49866290	0	51.6871	60.8958	1	1	0	0	0	0	0	0	0	0	0	0	0	0	0
2022-01-19	South Africa	18	5650	8.63959	100.358	4.60874	176.279	5.17207	482632	13.087	11948269	16.2961	25970000	17.0725	606000000	20.2224	1	1	2.18742e+06	14.5982	0	0	0	1	0	140	2580386	146936	3835	3625	49866290	1461833	51.6871	46.2894	1	1	0	0	0	0	0	0	0	0	0	0	0	0	0
2022-01-19	Sri Lanka	19	17478	9.76876	100.358	4.60874	199.224	5.29443	19268	9.86625	7752382	15.8635	25970000	17.0725	22200000	16.9156	1	0	2.21538e+06	14.6109	0	1	1	1	0	141	2580386	23940	3835	462	49866290	1481046	51.6871	53.7929	1	1	0	0	0	0	0	0	0	0	0	0	0	0	0
2022-01-19	Taiwan	20	8552	9.05404	100.358	4.60874	201598	12.214	0	0	283150	12.5537	25970000	17.0725	23260000	16.9622	1	0	2.49793e+06	14.731	0	1	1	1	0	18	2580386	1761	3835	1	49866290	4518567	51.6871	22.0448	1	1	0	0	0	0	0	0	0	0	0	0	0	0	0
2022-01-19	Thailand	21	45231	10.7196	100.358	4.60874	116.678	4.75942	458293	13.0353	4757578	15.3752	25970000	17.0725	71697030	18.088	0	1	2.38719e+06	14.6856	0	0	0	1	0	140	2580386	217107	3835	475	49866290	11589116	51.6871	48.6881	1	1	0	0	0	0	0	0	0	0	0	0	0	0	0
2022-01-19	Tonga	22	0	0	100.358	4.60874	141.42	4.95174	0	0	819159	13.616	25970000	17.0725	106858	11.5793	1	0	3.29898e+06	15.0091	0	1	1	1	0	140	2580386	0	3835	0	49866290	0	51.6871	47.22	1	1	0	0	0	0	0	0	0	0	0	0	0	0	0
2022-01-19	UK	23	44866	10.7115	100.358	4.60874	127.168	4.84551	5476154	15.5159	78699222	18.1811	25970000	17.0725	67508936	18.0278	1	1	1.83975e+06	14.4251	0	0	1	1	0	154	2580386	3530636	3835	6671	49866290	4830526	51.6871	39.3816	1	1	0	0	0	0	0	0	0	0	0	0	0	0	0
2022-01-19	United Arab Emirates	24	103146	11.5439	100.358	4.60874	1	0	0	0	558398	13.2328	25970000	17.0725	9441129	16.0606	1	1	1.69913e+06	14.3456	0	1	0	1	0	140	2580386	83121	3835	79	49866290	604828	51.6871	46.7706	1	1	0	0	0	0	0	0	0	0	0	0	0	0	0
2022-01-19	USA	25	111250	11.6195	100.358	4.60874	128.934	4.8593	3779722	15.1452	6868691	15.7425	25970000	17.0725	333287557	19.6245	1	1	2.35545e+06	14.6722	0	0	0	1	0	156	2580386	20356254	3835	63380	49866290	28570399	51.6871	46.7706	1	1	0	0	0	0	0	0	0	0	0	0	0	0	0
2022-01-19	Vietnam	26	11234	9.32679	100.358	4.60874	172.54	5.15063	8316	9.02606	15589709	16.5621	25970000	17.0725	98186856	18.4024	1	1	2.43923e+06	14.7072	0	0	0	1	0	179	2580386	544470	3835	5383	49866290	6448448	51.6871	67.5635	1	1	0	0	0	0	0	0	0	0	0	0	0	0	0
2022-02-13	Brunei	1	3556	8.17667	100.574	4.6109	105.605	4.65971	37887	10.5424	212692	12.2676	25970000	17.0725	449002	13.0148	1	1	2.6268e+06	14.7813	0	0	0	1	0	144	3235017	47066	5210	27	54065507	0	40.8711	50.7421	1	0	1	0	0	0	0	0	0	0	0	0	0	1	0
2022-02-14	Canada	2	13063	9.47762	100.574	4.6109	126.045	4.83664	1002785	13.8183	3380020	15.0334	25970000	17.0725	39292355	17.4865	1	1	2.24219e+06	14.623	0	0	0	1	0	176	3235017	228746	5210	2724	54065507	3181473	40.8711	62.9643	1	0	1	0	0	0	0	0	0	0	0	0	0	0	1
2022-02-15	Chile	3	0	0	100.574	4.6109	149.774	5.00913	50137	10.8225	2011682	14.5145	25970000	17.0725	19603733	16.7912	1	1	2.72558e+06	14.8182	0	0	0	1	0	163	3235017	895035	5210	2632	54065507	2038271	40.8711	29.4486	1	0	1	0	0	0	0	0	0	0	0	0	0	0	0
2022-02-16	China	4	10392	9.24889	100.574	4.6109	131.396	4.87821	538935	13.1974	34639116	17.3605	25970000	17.0725	1410000000	21.0669	1	1	2.36518e+06	14.6764	0	0	0	1	0	18	3235017	4675	5210	0	54065507	129313000	40.8711	64.1782	1	0	1	0	0	0	0	0	0	0	0	0	0	0	0
2022-02-18	Fiji	5	42792	10.6641	100.574	4.6109	134.047	4.89819	86969	11.3733	4727946	15.369	25970000	17.0725	929766	13.7427	1	0	3.25977e+06	14.9972	0	1	1	1	0	140	3235017	1075	5210	33	54065507	0	40.8711	48.0864	1	0	1	0	0	0	0	0	0	0	0	0	0	0	0
2022-02-19	Hong Kong (SAR)	6	5010	8.51939	100.574	4.6109	139.356	4.93703	374528	12.8334	6382068	15.669	25970000	17.0725	7656732	15.8511	1	1	2.4499e+06	14.7116	0	0	0	1	0	144	3235017	261547	5210	531	54065507	1988698	40.8711	68.3214	1	0	1	0	0	0	0	0	0	0	0	0	0	0	0
2022-02-20	India	7	39582	10.5862	100.574	4.6109	198.052	5.28853	26610	10.1891	30871904	17.2454	25970000	17.0725	1400000000	21.0597	1	1	2.08445e+06	14.55	0	0	0	1	0	141	3235017	1461546	5210	17781	54065507	110392609	40.8711	68.0021	1	0	1	0	0	0	0	0	0	0	0	0	0	0	0
2022-02-21	Indonesia	8	4700	8.45553	100.574	4.6109	158.973	5.06873	450018	13.017	5516814	15.5233	25970000	17.0725	275501339	19.4341	1	1	2.66431e+06	14.7955	0	0	0	1	0	142	3235017	1211078	5210	4015	54065507	20173897	40.8711	60.6743	1	0	1	0	0	0	0	0	0	0	0	0	0	0	0
2022-02-22	Japan	9	17174	9.75121	100.574	4.6109	106.205	4.66537	542139	13.2033	3954222	15.1903	25970000	17.0725	125050000	18.6442	1	0	2.52658e+06	14.7424	0	1	1	1	0	3	3235017	2267421	5210	4855	54065507	23954916	40.8711	47.22	1	0	1	0	0	0	0	0	0	0	0	0	0	0	0
2022-02-23	Korea	10	9056	9.11129	100.574	4.6109	121.914	4.80331	218275	12.2935	7024094	15.7649	25970000	17.0725	51844834	17.7638	0	1	2.44391e+06	14.7091	0	0	0	1	0	141	3235017	2409407	5210	1398	54065507	4755054	40.8711	40.0189	1	0	1	0	0	0	0	0	0	0	0	0	0	0	0
2022-02-24	Malaysia	11	19836	9.8953	100.574	4.6109	125.179	4.82975	219695	12.3	10940782	16.208	25970000	17.0725	33938221	17.3401	1	1	2.52051e+06	14.74	0	0	0	1	0	144	3235017	571978	5210	771	54065507	3642169	40.8711	40.0189	1	0	1	0	0	0	0	0	0	0	0	0	0	0	0
2022-02-25	Mauritius	12	0	0	100.574	4.6109	147.399	4.99314	5882	8.67982	1816769	14.4126	25970000	17.0725	1262523	14.0486	1	0	2.24274e+06	14.6232	0	1	1	1	0	176	3235017	61709	5210	82	54065507	0	40.8711	44.6468	1	0	1	0	0	0	0	0	0	0	0	0	0	0	0
2022-02-28	New Zealand	13	45585	10.7274	100.574	4.6109	1	0	2713576	14.8138	39985382	17.504	25970000	17.0725	5127400	15.4501	1	0	3.33103e+06	15.0188	0	1	1	1	0	179	3235017	102192	5210	32	54065507	1168769	40.8711	55.2779	1	0	1	0	0	0	0	0	0	0	0	0	0	0	0
2022-02-17	Philippines	14	4032	8.30227	100.574	4.6109	141.555	4.95269	167043	12.026	16227126	16.6022	25970000	17.0725	115000000	18.5604	1	0	2.62019e+06	14.7788	0	1	1	1	0	140	3235017	101795	5210	2448	54065507	665586	40.8711	64.4354	1	0	1	0	0	0	0	0	0	0	0	0	0	0	0
2022-02-17	Qatar	15	64181	11.0695	100.574	4.6109	117.502	4.76646	0	0	75068	11.2262	25970000	17.0725	2695122	14.807	1	1	1.80914e+06	14.4084	0	0	0	1	0	154	3235017	17835	5210	25	54065507	446510	40.8711	53.4371	1	0	1	0	0	0	0	0	0	0	0	0	0	0	0
2022-02-17	Singapore	16	297741	12.604	100.574	4.6109	120.56	4.79214	423733	12.9569	4797745	15.3837	25970000	17.0725	5640000	15.5454	1	1	2.54598e+06	14.75	0	0	0	1	0	144	3235017	371613	5210	164	54065507	735005	40.8711	49.6568	1	0	1	0	0	0	0	0	0	0	0	0	0	0	0
2022-02-17	Solomon Islands	17	1088	6.99302	100.574	4.6109	138.537	4.93114	17402	9.7644	160013	11.983	25970000	17.0725	724273	13.4929	1	0	3.10584e+06	14.9488	0	1	1	1	0	140	3235017	5866	5210	90	54065507	0	40.8711	86.4686	1	0	1	0	0	0	0	0	0	0	0	0	0	0	0
2022-02-17	South Africa	18	5661	8.64153	100.574	4.6109	177.335	5.17804	482632	13.087	11948269	16.2961	25970000	17.0725	606000000	20.2224	1	1	2.18742e+06	14.5982	0	0	0	1	0	140	3235017	68820	5210	4319	54065507	335513	40.8711	42.2729	1	0	1	0	0	0	0	0	0	0	0	0	0	0	0
2022-02-17	Sri Lanka	19	16384	9.70412	100.574	4.6109	201.384	5.30522	19268	9.86625	7752382	15.8635	25970000	17.0725	22200000	16.9156	1	0	2.21538e+06	14.6109	0	1	1	1	0	141	3235017	34849	5210	781	54065507	1936144	40.8711	52.2804	1	0	1	0	0	0	0	0	0	0	0	0	0	0	0
2022-02-17	Taiwan	20	9776	9.18779	100.574	4.6109	201598	12.214	0	0	283150	12.5537	25970000	17.0725	23260000	16.9622	1	0	2.49793e+06	14.731	0	1	1	1	0	18	3235017	1699	5210	2	54065507	3980175	40.8711	25.0339	1	0	1	0	0	0	0	0	0	0	0	0	0	0	0
2022-02-17	Thailand	21	48221	10.7836	100.574	4.6109	117.912	4.76994	458293	13.0353	4757578	15.3752	25970000	17.0725	71697030	18.088	0	1	2.38719e+06	14.6856	0	0	0	1	0	140	3235017	451385	5210	760	54065507	7090988	40.8711	47.9507	1	0	1	0	0	0	0	0	0	0	0	0	0	0	0
2022-02-17	Tonga	22	221	5.40268	100.574	4.6109	144.251	4.97156	0	0	819159	13.616	25970000	17.0725	106858	11.5793	1	0	3.29898e+06	15.0091	0	1	1	1	0	140	3235017	354	5210	0	54065507	0	40.8711	93.2064	1	0	1	0	0	0	0	0	0	0	0	0	0	0	0
2022-02-17	UK	23	37138	10.5224	100.574	4.6109	128.056	4.85247	5476154	15.5159	78699222	18.1811	25970000	17.0725	67508936	18.0278	1	1	1.83975e+06	14.4251	0	0	1	1	0	154	3235017	1570808	5210	3657	54065507	1740968	40.8711	32.6032	1	0	1	0	0	0	0	0	0	0	0	0	0	0	0
2022-02-17	United Arab Emirates	24	105152	11.5632	100.574	4.6109	1	0	0	0	558398	13.2328	25970000	17.0725	9441129	16.0606	1	1	1.69913e+06	14.3456	0	1	0	1	0	140	3235017	34915	5210	58	54065507	491876	40.8711	45.1971	1	0	1	0	0	0	0	0	0	0	0	0	0	0	0
2022-02-17	USA	25	96964	11.4821	100.574	4.6109	130.112	4.86839	3779722	15.1452	6868691	15.7425	25970000	17.0725	333287557	19.6245	1	1	2.35545e+06	14.6722	0	0	0	1	0	156	3235017	3939150	5210	61438	54065507	11146423	40.8711	45.1971	1	0	1	0	0	0	0	0	0	0	0	0	0	0	0
2022-02-17	Vietnam	26	11508	9.35088	100.574	4.6109	174.269	5.1606	8316	9.02606	15589709	16.5621	25970000	17.0725	98186856	18.4024	1	1	2.43923e+06	14.7072	0	0	0	1	0	179	3235017	1167758	5210	2475	54065507	5957496	40.8711	65.28	1	0	1	0	0	0	0	0	0	0	0	0	0	0	0
2022-03-16	Brunei	1	3810	8.24565	100.728	4.61243	106.562	4.66873	37887	10.5424	212692	12.2676	25970000	17.0725	449002	13.0148	1	1	2.6268e+06	14.7813	0	0	0	1	0	144	4573066	70870	6008	83	56362692	0	37.8242	53.1252	1	0	1	1	0	0	0	0	0	0	0	0	0	1	0
2022-03-17	Canada	2	14259	9.56521	100.728	4.61243	127.848	4.85084	1002785	13.8183	3380020	15.0334	25970000	17.0725	39292355	17.4865	1	1	2.24219e+06	14.623	0	0	0	1	0	176	4573066	187510	6008	1361	56362692	960302	37.8242	40.8326	1	0	0	1	0	0	0	0	0	0	0	0	0	0	1
2022-03-18	Chile	3	1240	7.12367	100.728	4.61243	152.561	5.02756	50137	10.8225	2011682	14.5145	25970000	17.0725	19603733	16.7912	1	1	2.72558e+06	14.8182	0	0	0	1	0	163	4573066	409917	6008	2780	56362692	2053653	37.8242	28.9587	1	0	0	1	0	0	0	0	0	0	0	0	0	0	0
2022-03-19	China	4	11828	9.37831	100.728	4.61243	131.396	4.87821	538935	13.1974	34639116	17.3605	25970000	17.0725	1410000000	21.0669	1	1	2.36518e+06	14.6764	0	0	0	1	0	18	4573066	103254	6008	2	56362692	141029000	37.8242	63.3487	1	0	0	1	0	0	0	0	0	0	0	0	0	0	0
2022-03-21	Fiji	5	50085	10.8215	100.728	4.61243	134.047	4.89819	86969	11.3733	4727946	15.369	25970000	17.0725	929766	13.7427	1	0	3.25977e+06	14.9972	0	1	1	1	0	140	4573066	474	6008	0	56362692	0	37.8242	36.9984	1	0	0	1	0	0	0	0	0	0	0	0	0	0	0
2022-03-22	Hong Kong (SAR)	6	7936	8.97929	100.728	4.61243	139.626	4.93897	374528	12.8334	6382068	15.669	25970000	17.0725	7656732	15.8511	1	1	2.4499e+06	14.7116	0	0	0	1	0	144	4573066	881671	6008	7081	56362692	2013681	37.8242	74.2839	1	0	0	1	0	0	0	0	0	0	0	0	0	0	0
2022-03-23	India	7	44241	10.6974	100.728	4.61243	199.96	5.29812	26610	10.1891	30871904	17.2454	25970000	17.0725	1400000000	21.0597	1	1	2.08445e+06	14.55	0	0	0	1	0	141	4573066	94730	6008	7158	56362692	66768398	37.8242	49.6968	1	0	0	1	0	0	0	0	0	0	0	0	0	0	0
2022-03-24	Indonesia	8	10150	9.22533	100.728	4.61243	160.016	5.07527	450018	13.017	5516814	15.5233	25970000	17.0725	275501339	19.4341	1	1	2.66431e+06	14.7955	0	0	0	1	0	142	4573066	448370	6008	6754	56362692	23193705	37.8242	52.8232	1	0	0	1	0	0	0	0	0	0	0	0	0	0	0
2022-03-25	Japan	9	19848	9.89591	100.728	4.61243	106.627	4.66934	542139	13.2033	3954222	15.1903	25970000	17.0725	125050000	18.6442	1	0	2.52658e+06	14.7424	0	1	1	1	0	3	4573066	1549704	6008	4453	56362692	26654047	37.8242	46.5635	1	0	0	1	0	0	0	0	0	0	0	0	0	0	0
2022-03-26	Korea	10	10188	9.22906	100.728	4.61243	122.793	4.8105	218275	12.2935	7024094	15.7649	25970000	17.0725	51844834	17.7638	0	1	2.44391e+06	14.7091	0	0	0	1	0	141	4573066	10102369	6008	8420	56362692	1685462	37.8242	39.9806	1	0	0	1	0	0	0	0	0	0	0	0	0	0	0
2022-03-27	Malaysia	11	33149	10.4088	100.728	4.61243	125.579	4.83294	219695	12.3	10940782	16.208	25970000	17.0725	33938221	17.3401	1	1	2.52051e+06	14.74	0	0	0	1	0	144	4573066	759183	6008	2234	56362692	1681978	37.8242	39.9806	1	0	0	1	0	0	0	0	0	0	0	0	0	0	0
2022-03-28	Mauritius	12	0	0	100.728	4.61243	150.532	5.01418	5882	8.67982	1816769	14.4126	25970000	17.0725	1262523	14.0486	1	0	2.24274e+06	14.6232	0	1	1	1	0	176	4573066	42699	6008	64	56362692	0	37.8242	42.86	1	0	0	1	0	0	0	0	0	0	0	0	0	0	0
2022-03-31	New Zealand	13	86241	11.3649	100.728	4.61243	1	0	2713576	14.8138	39985382	17.504	25970000	17.0725	5127400	15.4501	1	0	3.33103e+06	15.0188	0	1	1	1	0	179	4573066	553907	6008	281	56362692	331363	37.8242	42.9097	1	0	0	1	0	0	0	0	0	0	0	0	0	0	0
2022-03-26	Philippines	14	12406	9.42602	100.728	4.61243	142.442	4.95893	167043	12.026	16227126	16.6022	25970000	17.0725	115000000	18.5604	1	0	2.62019e+06	14.7788	0	1	1	1	0	140	4573066	16591	6008	2798	56362692	0	37.8242	57.6187	1	0	0	1	0	0	0	0	0	0	0	0	0	0	0
2022-03-26	Qatar	15	84877	11.349	100.728	4.61243	118.19	4.77229	0	0	75068	11.2262	25970000	17.0725	2695122	14.807	1	1	1.80914e+06	14.4084	0	0	0	1	0	154	4573066	4433	6008	7	56362692	411315	37.8242	43.4252	1	0	0	1	0	0	0	0	0	0	0	0	0	0	0
2022-03-26	Singapore	16	359265	12.7918	100.728	4.61243	122.061	4.80452	423733	12.9569	4797745	15.3837	25970000	17.0725	5640000	15.5454	1	1	2.54598e+06	14.75	0	0	0	1	0	144	4573066	372004	6008	249	56362692	319645	37.8242	45.3774	1	0	0	1	0	0	0	0	0	0	0	0	0	0	0
2022-03-26	Solomon Islands	17	1088	6.99302	100.728	4.61243	138.537	4.93114	17402	9.7644	160013	11.983	25970000	17.0725	724273	13.4929	1	0	3.10584e+06	14.9488	0	1	1	1	0	140	4573066	4421	6008	34	56362692	0	37.8242	81.7294	1	0	0	1	0	0	0	0	0	0	0	0	0	0	0
2022-03-26	South Africa	18	7546	8.92891	100.728	4.61243	179.27	5.18889	482632	13.087	11948269	16.2961	25970000	17.0725	606000000	20.2224	1	1	2.18742e+06	14.5982	0	0	0	1	0	140	4573066	44911	6008	620	56362692	1464358	37.8242	40.74	1	0	0	1	0	0	0	0	0	0	0	0	0	0	0
2022-03-26	Sri Lanka	19	26310	10.1777	100.728	4.61243	207.265	5.334	19268	9.86625	7752382	15.8635	25970000	17.0725	22200000	16.9156	1	0	2.21538e+06	14.6109	0	1	1	1	0	141	4573066	15597	6008	255	56362692	758833	37.8242	36.7955	1	0	0	1	0	0	0	0	0	0	0	0	0	0	0
2022-03-26	Taiwan	20	8866	9.09009	100.728	4.61243	201598	12.214	0	0	283150	12.5537	25970000	17.0725	23260000	16.9622	1	0	2.49793e+06	14.731	0	1	1	1	0	18	4573066	2905	6008	0	56362692	1968308	37.8242	27.2065	1	0	0	1	0	0	0	0	0	0	0	0	0	0	0
2022-03-26	Thailand	21	48345	10.7861	100.728	4.61243	118.694	4.77655	458293	13.0353	4757578	15.3752	25970000	17.0725	71697030	18.088	0	1	2.38719e+06	14.6856	0	0	0	1	0	140	4573066	736420	6008	2197	56362692	5708050	37.8242	48.61	1	0	0	1	0	0	0	0	0	0	0	0	0	0	0
2022-03-26	Tonga	22	0	0	100.728	4.61243	144.509	4.97334	0	0	819159	13.616	25970000	17.0725	106858	11.5793	1	0	3.29898e+06	15.0091	0	1	1	1	0	140	4573066	6068	6008	6	56362692	0	37.8242	78.7203	1	0	0	1	0	0	0	0	0	0	0	0	0	0	0
2022-03-26	UK	23	49112	10.8019	100.728	4.61243	129.277	4.86196	5476154	15.5159	78699222	18.1811	25970000	17.0725	67508936	18.0278	1	1	1.83975e+06	14.4251	0	0	1	1	0	154	4573066	2260724	6008	4379	56362692	2342354	37.8242	21.8945	1	0	0	1	0	0	0	0	0	0	0	0	0	0	0
2022-03-26	United Arab Emirates	24	161666	11.9933	100.728	4.61243	1	0	0	0	558398	13.2328	25970000	17.0725	9441129	16.0606	1	1	1.69913e+06	14.3456	0	1	0	1	0	140	4573066	11327	6008	1	56362692	44557	37.8242	36.1442	1	0	0	1	0	0	0	0	0	0	0	0	0	0	0
2022-03-26	USA	25	134943	11.8126	100.728	4.61243	131.849	4.88166	3779722	15.1452	6868691	15.7425	25970000	17.0725	333287557	19.6245	1	1	2.35545e+06	14.6722	0	0	0	1	0	156	4573066	1040858	6008	32899	56362692	6520703	37.8242	36.1442	1	0	0	1	0	0	0	0	0	0	0	0	0	0	0
2022-03-26	Vietnam	26	19382	9.87215	100.728	4.61243	175.492	5.16759	8316	9.02606	15589709	16.5621	25970000	17.0725	98186856	18.4024	1	1	2.43923e+06	14.7072	0	0	0	1	0	179	4573066	6121124	6008	2241	56362692	4634588	37.8242	65.1455	1	0	0	1	0	0	0	0	0	0	0	0	0	0	0
2022-04-17	Brunei	1	4064	8.31017	100.835	4.61348	106.248	4.66578	37887	10.5424	212692	12.2676	25970000	17.0725	449002	13.0148	1	1	2.6268e+06	14.7813	0	0	0	1	0	144	5953142	7438	7250	10	57575626	0	42.3057	46.18	1	0	0	0	1	0	0	0	0	0	0	0	0	1	0
2022-04-18	Canada	2	18951	9.84966	100.835	4.61348	128.62	4.85687	1002785	13.8183	3380020	15.0334	25970000	17.0725	39292355	17.4865	1	1	2.24219e+06	14.623	0	0	0	1	0	176	5953142	283300	7250	1668	57575626	1865682	42.3057	25.826	1	0	0	0	1	0	0	0	0	0	0	0	0	0	1
2022-04-19	Chile	3	12411	9.42642	100.835	4.61348	154.689	5.04142	50137	10.8225	2011682	14.5145	25970000	17.0725	19603733	16.7912	1	1	2.72558e+06	14.8182	0	0	0	1	0	163	5953142	87695	7250	947	57575626	1980326	42.3057	27.0163	1	0	0	0	1	0	0	0	0	0	0	0	0	0	0
2022-04-20	China	4	9766	9.18676	100.835	4.61348	131.909	4.88211	538935	13.1974	34639116	17.3605	25970000	17.0725	1410000000	21.0669	1	1	2.36518e+06	14.6764	0	0	0	1	0	18	5953142	583334	7250	424	57575626	73654000	42.3057	77.6253	1	0	0	0	1	0	0	0	0	0	0	0	0	0	0
2022-04-22	Fiji	5	87998	11.3851	100.835	4.61348	134.047	4.89819	86969	11.3733	4727946	15.369	25970000	17.0725	929766	13.7427	1	0	3.25977e+06	14.9972	0	1	1	1	0	140	5953142	230	7250	28	57575626	0	42.3057	33.585	1	0	0	0	1	0	0	0	0	0	0	0	0	0	0
2022-04-23	Hong Kong (SAR)	6	7348	8.90232	100.835	4.61348	139.356	4.93703	374528	12.8334	6382068	15.669	25970000	17.0725	7656732	15.8511	1	1	2.4499e+06	14.7116	0	0	0	1	0	144	5953142	46795	7250	1483	57575626	914095	42.3057	69.8167	1	0	0	0	1	0	0	0	0	0	0	0	0	0	0
2022-04-24	India	7	46382	10.7447	100.835	4.61348	202.822	5.31233	26610	10.1891	30871904	17.2454	25970000	17.0725	1400000000	21.0597	1	1	2.08445e+06	14.55	0	0	0	1	0	141	5953142	53413	7250	2662	57575626	36280908	42.3057	47.2053	1	0	0	0	1	0	0	0	0	0	0	0	0	0	0
2022-04-25	Indonesia	8	41871	10.6424	100.835	4.61348	161.528	5.08468	450018	13.017	5516814	15.5233	25970000	17.0725	275501339	19.4341	1	1	2.66431e+06	14.7955	0	0	0	1	0	142	5953142	33978	7250	1168	57575626	14746552	42.3057	47.401	1	0	0	0	1	0	0	0	0	0	0	0	0	0	0
2022-04-26	Japan	9	18418	9.82114	100.835	4.61348	107.049	4.67328	542139	13.2033	3954222	15.1903	25970000	17.0725	125050000	18.6442	1	0	2.52658e+06	14.7424	0	1	1	1	0	3	5953142	1315668	7250	1447	57575626	15272627	42.3057	45.37	1	0	0	0	1	0	0	0	0	0	0	0	0	0	0
2022-04-27	Korea	10	9652	9.17502	100.835	4.61348	123.708	4.81792	218275	12.2935	7024094	15.7649	25970000	17.0725	51844834	17.7638	0	1	2.44391e+06	14.7091	0	0	0	1	0	141	5953142	3899831	7250	6285	57575626	2334922	42.3057	31.188	1	0	0	0	1	0	0	0	0	0	0	0	0	0	0
2022-04-28	Malaysia	11	51308	10.8456	100.835	4.61348	125.879	4.83532	219695	12.3	10940782	16.208	25970000	17.0725	33938221	17.3401	1	1	2.52051e+06	14.74	0	0	0	1	0	144	5953142	246085	7250	564	57575626	1419288	42.3057	31.188	1	0	0	0	1	0	0	0	0	0	0	0	0	0	0
2022-04-29	Mauritius	12	0	0	100.835	4.61348	151.66	5.02164	5882	8.67982	1816769	14.4126	25970000	17.0725	1262523	14.0486	1	0	2.24274e+06	14.6232	0	1	1	1	0	176	5953142	10001	7250	22	57575626	0	42.3057	37.997	1	0	0	0	1	0	0	0	0	0	0	0	0	0	0
2022-04-17	New Zealand	13	180482	12.1034	100.835	4.61348	1	0	2713576	14.8138	39985382	17.504	25970000	17.0725	5127400	15.4501	1	0	3.33103e+06	15.0188	0	1	1	1	0	179	5953142	263986	7250	288	57575626	84166	42.3057	28.515	1	0	0	0	1	0	0	0	0	0	0	0	0	0	0
2022-04-17	Philippines	14	36255	10.4984	100.835	4.61348	143.581	4.9669	167043	12.026	16227126	16.6022	25970000	17.0725	115000000	18.5604	1	0	2.62019e+06	14.7788	0	1	1	1	0	140	5953142	7398	7250	1092	57575626	490686	42.3057	30.72	1	0	0	0	1	0	0	0	0	0	0	0	0	0	0
2022-04-17	Qatar	15	92446	11.4344	100.835	4.61348	118.527	4.77514	0	0	75068	11.2262	25970000	17.0725	2695122	14.807	1	1	1.80914e+06	14.4084	0	0	0	1	0	154	5953142	3187	7250	0	57575626	202025	42.3057	39.664	1	0	0	0	1	0	0	0	0	0	0	0	0	0	0
2022-04-17	Singapore	16	418575	12.9446	100.835	4.61348	121.896	4.80317	423733	12.9569	4797745	15.3837	25970000	17.0725	5640000	15.5454	1	1	2.54598e+06	14.75	0	0	0	1	0	144	5953142	96822	7250	67	57575626	187223	42.3057	44.2847	1	0	0	0	1	0	0	0	0	0	0	0	0	0	0
2022-04-17	Solomon Islands	17	2040	7.6212	100.835	4.61348	141.196	4.95015	17402	9.7644	160013	11.983	25970000	17.0725	724273	13.4929	1	0	3.10584e+06	14.9488	0	1	1	1	0	140	5953142	3316	7250	9	57575626	0	42.3057	72.378	1	0	0	0	1	0	0	0	0	0	0	0	0	0	0
2022-04-17	South Africa	18	8001	8.98745	100.835	4.61348	180.325	5.19476	482632	13.087	11948269	16.2961	25970000	17.0725	606000000	20.2224	1	1	2.18742e+06	14.5982	0	0	0	1	0	140	5953142	72172	7250	331	57575626	1109778	42.3057	27.9363	1	0	0	0	1	0	0	0	0	0	0	0	0	0	0
2022-04-17	Sri Lanka	19	24598	10.1105	100.835	4.61348	228.388	5.43104	19268	9.86625	7752382	15.8635	25970000	17.0725	22200000	16.9156	1	0	2.21538e+06	14.6109	0	1	1	1	0	141	5953142	1731	7250	27	57575626	0	42.3057	32.6667	1	0	0	0	1	0	0	0	0	0	0	0	0	0	0
2022-04-17	Taiwan	20	10690	9.27716	100.835	4.61348	186840	12.138	0	0	283150	12.5537	25970000	17.0725	23260000	16.9622	1	0	2.49793e+06	14.731	0	1	1	1	0	18	5953142	92489	7250	12	57575626	2054479	42.3057	27.5867	1	0	0	0	1	0	0	0	0	0	0	0	0	0	0
2022-04-17	Thailand	21	71697	11.1802	100.835	4.61348	119.102	4.77998	458293	13.0353	4757578	15.3752	25970000	17.0725	71697030	18.088	0	1	2.38719e+06	14.6856	0	0	0	1	0	140	5953142	622602	7250	3396	57575626	3713683	42.3057	40.28	1	0	0	0	1	0	0	0	0	0	0	0	0	0	0
2022-04-17	Tonga	22	0	0	100.835	4.61348	147.082	4.99099	0	0	819159	13.616	25970000	17.0725	106858	11.5793	1	0	3.29898e+06	15.0091	0	1	1	1	0	140	5953142	3773	7250	5	57575626	0	42.3057	81.02	1	0	0	0	1	0	0	0	0	0	0	0	0	0	0
2022-04-17	UK	23	78716	11.2736	100.835	4.61348	132.051	4.88319	5476154	15.5159	78699222	18.1811	25970000	17.0725	67508936	18.0278	1	1	1.83975e+06	14.4251	0	0	1	1	0	154	5953142	890915	7250	4841	57575626	3951244	42.3057	16.419	1	0	0	0	1	0	0	0	0	0	0	0	0	0	0
2022-04-17	United Arab Emirates	24	170976	12.0493	100.835	4.61348	1	0	0	0	558398	13.2328	25970000	17.0725	9441129	16.0606	1	1	1.69913e+06	14.3456	0	1	0	1	0	140	5953142	7271	7250	0	57575626	0	42.3057	29.215	1	0	0	0	1	0	0	0	0	0	0	0	0	0	0
2022-04-17	USA	25	158148	11.9713	100.835	4.61348	132.585	4.88722	3779722	15.1452	6868691	15.7425	25970000	17.0725	333287557	19.6245	1	1	2.35545e+06	14.6722	0	0	0	1	0	156	5953142	1244760	7250	13089	57575626	13540539	42.3057	29.215	1	0	0	0	1	0	0	0	0	0	0	0	0	0	0
2022-04-17	Vietnam	26	34910	10.4606	100.835	4.61348	175.816	5.16944	8316	9.02606	15589709	16.5621	25970000	17.0725	98186856	18.4024	1	1	2.43923e+06	14.7072	0	0	0	1	0	179	5953142	1085200	7250	548	57575626	5230588	42.3057	49.3827	1	0	0	0	1	0	0	0	0	0	0	0	0	0	0
2022-05-19	Brunei	1	4572	8.42792	100.901	4.61414	105.923	4.66271	37887	10.5424	212692	12.2676	25970000	17.0725	449002	13.0148	1	1	2.6268e+06	14.7813	0	0	0	1	0	144	7312408	6824	8558	5	59202011	0	32.9232	41.6842	1	0	0	0	0	1	0	0	0	0	0	0	0	1	0
2022-05-20	Canada	2	26096	10.1696	100.901	4.61414	130.424	4.87079	1002785	13.8183	3380020	15.0334	25970000	17.0725	39292355	17.4865	1	1	2.24219e+06	14.623	0	0	0	1	0	176	7312408	118996	8558	1754	59202011	1406091	32.9232	20.9916	1	0	0	0	0	1	0	0	0	0	0	0	0	0	1
2022-05-21	Chile	3	12224	9.41124	100.901	4.61414	156.547	5.05336	50137	10.8225	2011682	14.5145	25970000	17.0725	19603733	16.7912	1	1	2.72558e+06	14.8182	0	0	0	1	0	163	7312408	144310	8558	365	59202011	3995609	32.9232	27.1432	1	0	0	0	0	1	0	0	0	0	0	0	0	0	0
2022-05-22	China	4	10150	9.22533	100.901	4.61414	131.652	4.88016	538935	13.1974	34639116	17.3605	25970000	17.0725	1410000000	21.0669	1	1	2.36518e+06	14.6764	0	0	0	1	0	18	7312408	72570	8558	166	59202011	36786000	32.9232	79.17	1	0	0	0	0	1	0	0	0	0	0	0	0	0	0
2022-05-24	Fiji	5	73471	11.2047	100.901	4.61414	135.654	4.91011	86969	11.3733	4727946	15.369	25970000	17.0725	929766	13.7427	1	0	3.25977e+06	14.9972	0	1	1	1	0	140	7312408	373	8558	2	59202011	0	32.9232	33.3613	1	0	0	0	0	1	0	0	0	0	0	0	0	0	0
2022-05-25	Hong Kong (SAR)	6	6680	8.80702	100.901	4.61414	139.085	4.93509	374528	12.8334	6382068	15.669	25970000	17.0725	7656732	15.8511	1	1	2.4499e+06	14.7116	0	0	0	1	0	144	7312408	8489	8558	70	59202011	1040112	32.9232	51.4219	1	0	0	0	0	1	0	0	0	0	0	0	0	0	0
2022-05-26	India	7	48199	10.7831	100.901	4.61414	204.73	5.32169	26610	10.1891	30871904	17.2454	25970000	17.0725	1400000000	21.0597	1	1	2.08445e+06	14.55	0	0	0	1	0	141	7312408	81644	8558	793	59202011	45025096	32.9232	37.04	1	0	0	0	0	1	0	0	0	0	0	0	0	0	0
2022-05-27	Indonesia	8	105298	11.5646	100.901	4.61414	162.175	5.08867	450018	13.017	5516814	15.5233	25970000	17.0725	275501339	19.4341	1	1	2.66431e+06	14.7955	0	0	0	1	0	142	7312408	8177	8558	334	59202011	0	32.9232	42.5097	1	0	0	0	0	1	0	0	0	0	0	0	0	0	0
2022-05-28	Japan	9	18384	9.81929	100.901	4.61414	107.365	4.67624	542139	13.2033	3954222	15.1903	25970000	17.0725	125050000	18.6442	1	0	2.52658e+06	14.7424	0	1	1	1	0	3	7312408	967494	8558	1052	59202011	7379891	32.9232	44.779	1	0	0	0	0	1	0	0	0	0	0	0	0	0	0
2022-05-29	Korea	10	13524	9.5123	100.901	4.61414	124.53	4.82455	218275	12.2935	7024094	15.7649	25970000	17.0725	51844834	17.7638	0	1	2.44391e+06	14.7091	0	0	0	1	0	141	7312408	843766	8558	1322	59202011	2217976	32.9232	17.8065	1	0	0	0	0	1	0	0	0	0	0	0	0	0	0
2022-05-30	Malaysia	11	45990	10.7362	100.901	4.61414	126.579	4.84087	219695	12.3	10940782	16.208	25970000	17.0725	33938221	17.3401	1	1	2.52051e+06	14.74	0	0	0	1	0	144	7312408	58506	8558	129	59202011	679861	32.9232	17.8065	1	0	0	0	0	1	0	0	0	0	0	0	0	0	0
2022-05-31	Mauritius	12	0	0	100.901	4.61414	152.412	5.02659	5882	8.67982	1816769	14.4126	25970000	17.0725	1262523	14.0486	1	0	2.24274e+06	14.6232	0	1	1	1	0	176	7312408	5518	8558	6	59202011	0	32.9232	30.8039	1	0	0	0	0	1	0	0	0	0	0	0	0	0	0
2022-05-20	New Zealand	13	225241	12.3249	100.901	4.61414	1	0	2713576	14.8138	39985382	17.504	25970000	17.0725	5127400	15.4501	1	0	3.33103e+06	15.0188	0	1	1	1	0	179	7312408	234119	8558	254	59202011	41358	32.9232	17.1697	1	0	0	0	0	1	0	0	0	0	0	0	0	0	0
2022-05-20	Philippines	14	30328	10.3199	100.901	4.61414	144.214	4.9713	167043	12.026	16227126	16.6022	25970000	17.0725	115000000	18.5604	1	0	2.62019e+06	14.7788	0	1	1	1	0	140	7312408	5229	8558	120	59202011	0	32.9232	30.8258	1	0	0	0	0	1	0	0	0	0	0	0	0	0	0
2022-05-20	Qatar	15	96794	11.4804	100.901	4.61414	120.111	4.78842	0	0	75068	11.2262	25970000	17.0725	2695122	14.807	1	1	1.80914e+06	14.4084	0	0	0	1	0	154	7312408	4186	8558	0	59202011	68326	32.9232	32.6739	1	0	0	0	0	1	0	0	0	0	0	0	0	0	0
2022-05-20	Singapore	16	439131	12.9926	100.901	4.61414	123.098	4.81298	423733	12.9569	4797745	15.3837	25970000	17.0725	5640000	15.5454	1	1	2.54598e+06	14.75	0	0	0	1	0	144	7312408	110044	8558	54	59202011	171492	32.9232	28.4168	1	0	0	0	0	1	0	0	0	0	0	0	0	0	0
2022-05-20	Solomon Islands	17	2176	7.6857	100.901	4.61414	144.235	4.97145	17402	9.7644	160013	11.983	25970000	17.0725	724273	13.4929	1	0	3.10584e+06	14.9488	0	1	1	1	0	140	7312408	3388	8558	5	59202011	0	32.9232	73.9319	1	0	0	0	0	1	0	0	0	0	0	0	0	0	0
2022-05-20	South Africa	18	8010	8.98857	100.901	4.61414	181.557	5.20157	482632	13.087	11948269	16.2961	25970000	17.0725	606000000	20.2224	1	1	2.18742e+06	14.5982	0	0	0	1	0	140	7312408	166652	8558	827	59202011	1198316	32.9232	14.29	1	0	0	0	0	1	0	0	0	0	0	0	0	0	0
2022-05-20	Sri Lanka	19	29600	10.2956	100.901	4.61414	250.47	5.52334	19268	9.86625	7752382	15.8635	25970000	17.0725	22200000	16.9156	1	0	2.21538e+06	14.6109	0	1	1	1	0	141	7312408	472	8558	13	59202011	0	32.9232	30.5671	1	0	0	0	0	1	0	0	0	0	0	0	0	0	0
2022-05-20	Taiwan	20	10082	9.21861	100.901	4.61414	186840	12.138	0	0	283150	12.5537	25970000	17.0725	23260000	16.9622	1	0	2.49793e+06	14.731	0	1	1	1	0	18	7312408	1917100	8558	1390	59202011	2121628	32.9232	26.85	1	0	0	0	0	1	0	0	0	0	0	0	0	0	0
2022-05-20	Thailand	21	0	0	100.901	4.61414	120.767	4.79386	458293	13.0353	4757578	15.3752	25970000	17.0725	71697030	18.088	0	1	2.38719e+06	14.6856	0	0	0	1	0	140	7312408	208850	8558	1568	59202011	3814641	32.9232	36.2752	1	0	0	0	0	1	0	0	0	0	0	0	0	0	0
2022-05-20	Tonga	22	78158	11.2665	100.901	4.61414	149.27	5.00576	0	0	819159	13.616	25970000	17.0725	106858	11.5793	1	0	3.29898e+06	15.0091	0	1	1	1	0	140	7312408	1448	8558	1	59202011	0	32.9232	53.5574	1	0	0	0	0	1	0	0	0	0	0	0	0	0	0
2022-05-20	UK	23	82456	11.32	100.901	4.61414	132.828	4.88905	5476154	15.5159	78699222	18.1811	25970000	17.0725	67508936	18.0278	1	1	1.83975e+06	14.4251	0	0	1	1	0	154	7312408	266182	8558	2091	59202011	2371840	32.9232	11.11	1	0	0	0	0	1	0	0	0	0	0	0	0	0	0
2022-05-20	United Arab Emirates	24	216948	12.2874	100.901	4.61414	1	0	0	0	558398	13.2328	25970000	17.0725	9441129	16.0606	1	1	1.69913e+06	14.3456	0	1	0	1	0	140	7312408	9634	8558	3	59202011	8968	32.9232	26.9581	1	0	0	0	0	1	0	0	0	0	0	0	0	0	0
2022-05-20	USA	25	162093	11.9959	100.901	4.61414	134.047	4.89819	3779722	15.1452	6868691	15.7425	25970000	17.0725	333287557	19.6245	1	1	2.35545e+06	14.6722	0	0	0	1	0	156	7312408	2861199	8558	11007	59202011	10500472	32.9232	26.9581	1	0	0	0	0	1	0	0	0	0	0	0	0	0	0
2022-05-20	Vietnam	26	39328	10.5797	100.901	4.61414	176.48	5.17321	8316	9.02606	15589709	16.5621	25970000	17.0725	98186856	18.4024	1	1	2.43923e+06	14.7072	0	0	0	1	0	179	7312408	69570	8558	38	59202011	3216296	32.9232	27.181	1	0	0	0	0	1	0	0	0	0	0	0	0	0	0
2022-06-20	Brunei	1	4318	8.37078	100.932	4.61445	106.74	4.67039	37887	10.5424	212692	12.2676	25970000	17.0725	449002	13.0148	1	1	2.6268e+06	14.7813	0	0	0	1	0	144	8164673	15226	9930	2	60277104	0	19.222	14.0957	1	0	0	0	0	0	1	0	0	0	0	0	0	1	0
2022-06-21	Canada	2	31163	10.347	100.932	4.61445	131.282	4.87735	1002785	13.8183	3380020	15.0334	25970000	17.0725	39292355	17.4865	1	1	2.24219e+06	14.623	0	0	0	1	0	176	8164673	78174	9930	933	60277104	812867	19.222	18.0543	1	0	0	0	0	0	1	0	0	0	0	0	0	0	1
2022-06-22	Chile	3	12188	9.40829	100.932	4.61445	158.005	5.06262	50137	10.8225	2011682	14.5145	25970000	17.0725	19603733	16.7912	1	1	2.72558e+06	14.8182	0	0	0	1	0	163	8164673	287752	9930	587	60277104	2672805	19.222	27.039	1	0	0	0	0	0	1	0	0	0	0	0	0	0	0
2022-06-23	China	4	12312	9.41841	100.932	4.61445	131.652	4.88016	538935	13.1974	34639116	17.3605	25970000	17.0725	1410000000	21.0669	1	1	2.36518e+06	14.6764	0	0	0	1	0	18	8164673	4755	9930	0	60277104	21308000	19.222	79.17	1	0	0	0	0	0	1	0	0	0	0	0	0	0	0
2022-06-25	Fiji	5	81248	11.3053	100.932	4.61445	135.31	4.90757	86969	11.3733	4727946	15.369	25970000	17.0725	929766	13.7427	1	0	3.25977e+06	14.9972	0	1	1	1	0	140	8164673	706	9930	2	60277104	0	19.222	37.0517	1	0	0	0	0	0	1	0	0	0	0	0	0	0	0
2022-06-26	Hong Kong (SAR)	6	38504	10.5585	100.932	4.61445	139.491	4.938	374528	12.8334	6382068	15.669	25970000	17.0725	7656732	15.8511	1	1	2.4499e+06	14.7116	0	0	0	1	0	144	8164673	33098	9930	23	60277104	630818	19.222	47.241	1	0	0	0	0	0	1	0	0	0	0	0	0	0	0
2022-06-27	India	7	43059	10.6703	100.932	4.61445	205.803	5.32692	26610	10.1891	30871904	17.2454	25970000	17.0725	1400000000	21.0597	1	1	2.08445e+06	14.55	0	0	0	1	0	141	8164673	308402	9930	503	60277104	41628480	19.222	37.04	1	0	0	0	0	0	1	0	0	0	0	0	0	0	0
2022-06-28	Indonesia	8	158069	11.9708	100.932	4.61445	163.159	5.09472	450018	13.017	5516814	15.5233	25970000	17.0725	275501339	19.4341	1	1	2.66431e+06	14.7955	0	0	0	1	0	142	8164673	33487	9930	146	60277104	0	19.222	32.8743	1	0	0	0	0	0	1	0	0	0	0	0	0	0	0
2022-06-29	Japan	9	19402	9.87318	100.932	4.61445	107.365	4.67624	542139	13.2033	3954222	15.1903	25970000	17.0725	125050000	18.6442	1	0	2.52658e+06	14.7424	0	1	1	1	0	3	8164673	478207	9930	658	60277104	3950734	19.222	39.1897	1	0	0	0	0	0	1	0	0	0	0	0	0	0	0
2022-06-30	Korea	10	14716	9.59676	100.932	4.61445	125.294	4.83067	218275	12.2935	7024094	15.7649	25970000	17.0725	51844834	17.7638	0	1	2.44391e+06	14.7091	0	0	0	1	0	141	8164673	249442	9930	358	60277104	428121	19.222	14.4413	1	0	0	0	0	0	1	0	0	0	0	0	0	0	0
2022-06-20	Malaysia	11	62672	11.0457	100.932	4.61445	127.379	4.84717	219695	12.3	10940782	16.208	25970000	17.0725	33938221	17.3401	1	1	2.52051e+06	14.74	0	0	0	1	0	144	8164673	59545	9930	89	60277104	299499	19.222	14.4413	1	0	0	0	0	0	1	0	0	0	0	0	0	0	0
2022-06-20	Mauritius	12	0	0	100.932	4.61445	153.039	5.03069	5882	8.67982	1816769	14.4126	25970000	17.0725	1262523	14.0486	1	0	2.24274e+06	14.6232	0	1	1	1	0	176	8164673	5174	9930	7	60277104	0	19.222	28.241	1	0	0	0	0	0	1	0	0	0	0	0	0	0	0
2022-06-20	New Zealand	13	297671	12.6037	100.932	4.61445	1	0	2713576	14.8138	39985382	17.504	25970000	17.0725	5127400	15.4501	1	0	3.33103e+06	15.0188	0	1	1	1	0	179	8164673	174987	9930	216	60277104	56530	19.222	17.1347	1	0	0	0	0	0	1	0	0	0	0	0	0	0	0
2022-06-20	Philippines	14	32838	10.3994	100.932	4.61445	145.481	4.98004	167043	12.026	16227126	16.6022	25970000	17.0725	115000000	18.5604	1	0	2.62019e+06	14.7788	0	1	1	1	0	140	8164673	13826	9930	100	60277104	0	19.222	31.6707	1	0	0	0	0	0	1	0	0	0	0	0	0	0	0
2022-06-20	Qatar	15	103754	11.5498	100.932	4.61445	120.123	4.78852	0	0	75068	11.2262	25970000	17.0725	2695122	14.807	1	1	1.80914e+06	14.4084	0	0	0	1	0	154	8164673	13847	9930	2	60277104	100921	19.222	33.673	1	0	0	0	0	0	1	0	0	0	0	0	0	0	0
2022-06-20	Singapore	16	458900	13.0366	100.932	4.61445	124.326	4.82291	423733	12.9569	4797745	15.3837	25970000	17.0725	5640000	15.5454	1	1	2.54598e+06	14.75	0	0	0	1	0	144	8164673	140774	9930	24	60277104	93934	19.222	29.293	1	0	0	0	0	0	1	0	0	0	0	0	0	0	0
2022-06-20	Solomon Islands	17	2448	7.80344	100.932	4.61445	1	0	17402	9.7644	160013	11.983	25970000	17.0725	724273	13.4929	1	0	3.10584e+06	14.9488	0	1	1	1	0	140	8164673	3370	9930	7	60277104	0	19.222	41.1687	1	0	0	0	0	0	1	0	0	0	0	0	0	0	0
2022-06-20	South Africa	18	8021	8.98994	100.932	4.61445	183.492	5.21217	482632	13.087	11948269	16.2961	25970000	17.0725	606000000	20.2224	1	1	2.18742e+06	14.5982	0	0	0	1	0	140	8164673	35667	9930	574	60277104	760410	19.222	13.9833	1	0	0	0	0	0	1	0	0	0	0	0	0	0	0
2022-06-20	Sri Lanka	19	24504	10.1066	100.932	4.61445	277.834	5.62702	19268	9.86625	7752382	15.8635	25970000	17.0725	22200000	16.9156	1	0	2.21538e+06	14.6109	0	1	1	1	0	141	8164673	289	9930	4	60277104	0	19.222	30.56	1	0	0	0	0	0	1	0	0	0	0	0	0	0	0
2022-06-20	Taiwan	20	12216	9.41058	100.932	4.61445	186840	12.138	0	0	283150	12.5537	25970000	17.0725	23260000	16.9622	1	0	2.49793e+06	14.731	0	1	1	1	0	18	8164673	1734300	9930	4396	60277104	2586096	19.222	26.85	1	0	0	0	0	0	1	0	0	0	0	0	0	0	0
2022-06-20	Thailand	21	80773	11.2994	100.932	4.61445	121.854	4.80282	458293	13.0353	4757578	15.3752	25970000	17.0725	71697030	18.088	0	1	2.38719e+06	14.6856	0	0	0	1	0	140	8164673	72458	9930	629	60277104	1910402	19.222	27.6213	1	0	0	0	0	0	1	0	0	0	0	0	0	0	0
2022-06-20	Tonga	22	0	0	100.932	4.61445	150.685	5.01519	0	0	819159	13.616	25970000	17.0725	106858	11.5793	1	0	3.29898e+06	15.0091	0	1	1	1	0	140	8164673	657	9930	0	60277104	0	19.222	54.9817	1	0	0	0	0	0	1	0	0	0	0	0	0	0	0
2022-06-20	UK	23	93748	11.4484	100.932	4.61445	133.716	4.89571	5476154	15.5159	78699222	18.1811	25970000	17.0725	67508936	18.0278	1	1	1.83975e+06	14.4251	0	0	1	1	0	154	8164673	419758	9930	1432	60277104	1210539	19.222	11.11	1	0	0	0	0	0	1	0	0	0	0	0	0	0	0
2022-06-20	United Arab Emirates	24	216394	12.2849	100.932	4.61445	1	0	0	0	558398	13.2328	25970000	17.0725	9441129	16.0606	1	1	1.69913e+06	14.3456	0	1	0	1	0	140	8164673	37595	9930	11	60277104	6152	19.222	31.2683	1	0	0	0	0	0	1	0	0	0	0	0	0	0	0
2022-06-20	USA	25	160215	11.9843	100.932	4.61445	135.888	4.91183	3779722	15.1452	6868691	15.7425	25970000	17.0725	333287557	19.6245	1	1	2.35545e+06	14.6722	0	0	0	1	0	156	8164673	3347584	9930	10578	60277104	7588358	19.222	31.2683	1	0	0	0	0	0	1	0	0	0	0	0	0	0	0
2022-06-20	Vietnam	26	41918	10.6435	100.932	4.61445	177.69	5.18004	8316	9.02606	15589709	16.5621	25970000	17.0725	98186856	18.4024	1	1	2.43923e+06	14.7072	0	0	0	1	0	179	8164673	27091	9930	8	60277104	6495169	19.222	25.93	1	0	0	0	0	0	1	0	0	0	0	0	0	0	0
2022-07-22	Brunei	1	11430	9.34408	100.929	4.61441	106.642	4.66947	37887	10.5424	212692	12.2676	25970000	17.0725	449002	13.0148	1	1	2.6268e+06	14.7813	0	0	0	1	0	144	9435839	41990	11865	0	62255266	0	11.7906	13.97	1	0	0	0	0	0	0	1	0	0	0	0	0	1	0
2022-07-23	Canada	2	42790	10.6641	100.929	4.61441	131.454	4.87866	1002785	13.8183	3380020	15.0334	25970000	17.0725	39292355	17.4865	1	1	2.24219e+06	14.623	0	0	0	1	0	176	9435839	130388	11865	999	62255266	1322914	11.7906	16.9261	1	0	0	0	0	0	0	1	0	0	0	0	0	0	1
2022-07-24	Chile	3	20634	9.93474	100.929	4.61441	160.172	5.07625	50137	10.8225	2011682	14.5145	25970000	17.0725	19603733	16.7912	1	1	2.72558e+06	14.8182	0	0	0	1	0	163	9435839	250853	11865	1098	62255266	1619171	11.7906	26.9603	1	0	0	0	0	0	0	1	0	0	0	0	0	0	0
2022-07-25	China	4	9682	9.17813	100.929	4.61441	132.293	4.88502	538935	13.1974	34639116	17.3605	25970000	17.0725	1410000000	21.0669	1	1	2.36518e+06	14.6764	0	0	0	1	0	18	9435839	17335	11865	0	62255266	21047000	11.7906	73.61	1	0	0	0	0	0	0	1	0	0	0	0	0	0	0
2022-07-27	Fiji	5	105477	11.5663	100.929	4.61441	135.31	4.90757	86969	11.3733	4727946	15.369	25970000	17.0725	929766	13.7427	1	0	3.25977e+06	14.9972	0	1	1	1	0	140	9435839	1836	11865	4	62255266	0	11.7906	35.3842	1	0	0	0	0	0	0	1	0	0	0	0	0	0	0
2022-07-28	Hong Kong (SAR)	6	30482	10.3249	100.929	4.61441	139.626	4.93897	374528	12.8334	6382068	15.669	25970000	17.0725	7656732	15.8511	1	1	2.4499e+06	14.7116	0	0	0	1	0	144	9435839	108197	11865	102	62255266	364395	11.7906	47.1658	1	0	0	0	0	0	0	1	0	0	0	0	0	0	0
2022-07-29	India	7	44499	10.7032	100.929	4.61441	206.757	5.33154	26610	10.1891	30871904	17.2454	25970000	17.0725	1400000000	21.0597	1	1	2.08445e+06	14.55	0	0	0	1	0	141	9435839	567041	11865	1257	62255266	59862946	11.7906	37.04	1	0	0	0	0	0	0	1	0	0	0	0	0	0	0
2022-07-30	Indonesia	8	211765	12.2632	100.929	4.61441	164.201	5.10109	450018	13.017	5516814	15.5233	25970000	17.0725	275501339	19.4341	1	1	2.66431e+06	14.7955	0	0	0	1	0	142	9435839	118638	11865	256	62255266	0	11.7906	29.8719	1	0	0	0	0	0	0	1	0	0	0	0	0	0	0
2022-07-31	Japan	9	33264	10.4123	100.929	4.61441	107.892	4.68113	542139	13.2033	3954222	15.1903	25970000	17.0725	125050000	18.6442	1	0	2.52658e+06	14.7424	0	1	1	1	0	3	9435839	3462217	11865	1332	62255266	14919638	11.7906	37.52	1	0	0	0	0	0	0	1	0	0	0	0	0	0	0
2022-07-22	Korea	10	19542	9.88037	100.929	4.61441	125.896	4.83546	218275	12.2935	7024094	15.7649	25970000	17.0725	51844834	17.7638	0	1	2.44391e+06	14.7091	0	0	0	1	0	141	9435839	1451882	11865	513	62255266	1288748	11.7906	14.4255	1	0	0	0	0	0	0	1	0	0	0	0	0	0	0
2022-07-22	Malaysia	11	114960	11.6523	100.929	4.61441	127.879	4.85108	219695	12.3	10940782	16.208	25970000	17.0725	33938221	17.3401	1	1	2.52051e+06	14.74	0	0	0	1	0	144	9435839	113998	11865	204	62255266	431809	11.7906	14.4255	1	0	0	0	0	0	0	1	0	0	0	0	0	0	0
2022-07-22	Mauritius	12	0	0	100.929	4.61441	155.421	5.04613	5882	8.67982	1816769	14.4126	25970000	17.0725	1262523	14.0486	1	0	2.24274e+06	14.6232	0	1	1	1	0	176	9435839	13814	11865	10	62255266	0	11.7906	5.56	1	0	0	0	0	0	0	1	0	0	0	0	0	0	0
2022-07-22	New Zealand	13	471893	13.0645	100.929	4.61441	1	0	2713576	14.8138	39985382	17.504	25970000	17.0725	5127400	15.4501	1	0	3.33103e+06	15.0188	0	1	1	1	0	179	9435839	276152	11865	396	62255266	335559	11.7906	15.8168	1	0	0	0	0	0	0	1	0	0	0	0	0	0	0
2022-07-22	Philippines	14	60004	11.0022	100.929	4.61441	146.62	4.98784	167043	12.026	16227126	16.6022	25970000	17.0725	115000000	18.5604	1	0	2.62019e+06	14.7788	0	1	1	1	0	140	9435839	72220	11865	172	62255266	0	11.7906	30.5061	1	0	0	0	0	0	0	1	0	0	0	0	0	0	0
2022-07-22	Qatar	15	114182	11.6456	100.929	4.61441	120.717	4.79345	0	0	75068	11.2262	25970000	17.0725	2695122	14.807	1	1	1.80914e+06	14.4084	0	0	0	1	0	154	9435839	26021	11865	2	62255266	27258	11.7906	32.3529	1	0	0	0	0	0	0	1	0	0	0	0	0	0	0
2022-07-22	Singapore	16	486453	13.0949	100.929	4.61441	124.515	4.82442	423733	12.9569	4797745	15.3837	25970000	17.0725	5640000	15.5454	1	1	2.54598e+06	14.75	0	0	0	1	0	144	9435839	269988	11865	87	62255266	53553	11.7906	28.3213	1	0	0	0	0	0	0	1	0	0	0	0	0	0	0
2022-07-22	Solomon Islands	17	2448	7.80344	100.929	4.61441	1	0	17402	9.7644	160013	11.983	25970000	17.0725	724273	13.4929	1	0	3.10584e+06	14.9488	0	1	1	1	0	140	9435839	0	11865	0	62255266	0	11.7906	31.3606	1	0	0	0	0	0	0	1	0	0	0	0	0	0	0
2022-07-22	South Africa	18	8965	9.10119	100.929	4.61441	186.483	5.22834	482632	13.087	11948269	16.2961	25970000	17.0725	606000000	20.2224	1	1	2.18742e+06	14.5982	0	0	0	1	0	140	9435839	11680	11865	218	62255266	331148	11.7906	13.89	1	0	0	0	0	0	0	1	0	0	0	0	0	0	0
2022-07-22	Sri Lanka	19	26668	10.1913	100.929	4.61441	293.316	5.68125	19268	9.86625	7752382	15.8635	25970000	17.0725	22200000	16.9156	1	0	2.21538e+06	14.6109	0	1	1	1	0	141	9435839	1616	11865	35	62255266	0	11.7906	30.56	1	0	0	0	0	0	0	1	0	0	0	0	0	0	0
2022-07-22	Taiwan	20	13426	9.50502	100.929	4.61441	187954	12.144	0	0	283150	12.5537	25970000	17.0725	23260000	16.9622	1	0	2.49793e+06	14.731	0	1	1	1	0	18	9435839	820902	11865	2276	62255266	1302770	11.7906	26.85	1	0	0	0	0	0	0	1	0	0	0	0	0	0	0
2022-07-22	Thailand	21	99677	11.5097	100.929	4.61441	121.662	4.80124	458293	13.0353	4757578	15.3752	25970000	17.0725	71697030	18.088	0	1	2.38719e+06	14.6856	0	0	0	1	0	140	9435839	69369	11865	756	62255266	1848221	11.7906	24.07	1	0	0	0	0	0	0	1	0	0	0	0	0	0	0
2022-07-22	Tonga	22	0	0	100.929	4.61441	153.645	5.03465	0	0	819159	13.616	25970000	17.0725	106858	11.5793	1	0	3.29898e+06	15.0091	0	1	1	1	0	140	9435839	253	11865	0	62255266	0	11.7906	60.8232	1	0	0	0	0	0	0	1	0	0	0	0	0	0	0
2022-07-22	UK	23	116008	11.6614	100.929	4.61441	134.492	4.90151	5476154	15.5159	78699222	18.1811	25970000	17.0725	67508936	18.0278	1	1	1.83975e+06	14.4251	0	0	1	1	0	154	9435839	584138	11865	3580	62255266	933527	11.7906	11.11	1	0	0	0	0	0	0	1	0	0	0	0	0	0	0
2022-07-22	United Arab Emirates	24	224076	12.3197	100.929	4.61441	1	0	0	0	558398	13.2328	25970000	17.0725	9441129	16.0606	1	1	1.69913e+06	14.3456	0	1	0	1	0	140	9435839	45764	11865	19	62255266	0	11.7906	31.03	1	0	0	0	0	0	0	1	0	0	0	0	0	0	0
2022-07-22	USA	25	165370	12.0159	100.929	4.61441	135.872	4.91171	3779722	15.1452	6868691	15.7425	25970000	17.0725	333287557	19.6245	1	1	2.35545e+06	14.6722	0	0	0	1	0	156	9435839	3669586	11865	12701	62255266	7675638	11.7906	31.03	1	0	0	0	0	0	0	1	0	0	0	0	0	0	0
2022-07-22	Vietnam	26	59628	10.9959	100.929	4.61441	178.392	5.18398	8316	9.02606	15589709	16.5621	25970000	17.0725	98186856	18.4024	1	1	2.43923e+06	14.7072	0	0	0	1	0	179	9435839	33162	11865	6	62255266	66330	11.7906	25.93	1	0	0	0	0	0	0	1	0	0	0	0	0	0	0
2022-08-23	Brunei	1	10414	9.251	100.894	4.61407	107.273	4.67537	37887	10.5424	212692	12.2676	25970000	17.0725	449002	13.0148	1	1	2.6268e+06	14.7813	0	0	0	1	0	144	10042081	14355	13961	0	63011373	0	11.11	13.949	1	0	0	0	0	0	0	0	1	0	0	0	0	1	0
2022-08-24	Canada	2	43088	10.671	100.894	4.61407	131.025	4.87539	1002785	13.8183	3380020	15.0334	25970000	17.0725	39292355	17.4865	1	1	2.24219e+06	14.623	0	0	0	1	0	176	10042081	110085	13961	1214	63011373	1129549	11.11	18.611	1	0	0	0	0	0	0	0	1	0	0	0	0	0	1
2022-08-25	Chile	3	20148	9.91091	100.894	4.61407	162.12	5.08834	50137	10.8225	2011682	14.5145	25970000	17.0725	19603733	16.7912	1	1	2.72558e+06	14.8182	0	0	0	1	0	163	10042081	266876	13961	874	63011373	883842	11.11	26.8939	1	0	0	0	0	0	0	0	1	0	0	0	0	0	0
2022-08-26	China	4	16790	9.7286	100.894	4.61407	132.165	4.88405	538935	13.1974	34639116	17.3605	25970000	17.0725	1410000000	21.0669	1	1	2.36518e+06	14.6764	0	0	0	1	0	18	10042081	50500	13961	0	63011373	9109000	11.11	75.2242	1	0	0	0	0	0	0	0	1	0	0	0	0	0	0
2022-08-28	Fiji	5	95086	11.4625	100.894	4.61407	136.687	4.91769	86969	11.3733	4727946	15.369	25970000	17.0725	929766	13.7427	1	0	3.25977e+06	14.9972	0	1	1	1	0	140	10042081	604	13961	8	63011373	0	11.11	35.6906	1	0	0	0	0	0	0	0	1	0	0	0	0	0	0
2022-08-29	Hong Kong (SAR)	6	24972	10.1256	100.894	4.61407	139.761	4.93994	374528	12.8334	6382068	15.669	25970000	17.0725	7656732	15.8511	1	1	2.4499e+06	14.7116	0	0	0	1	0	144	10042081	186809	13961	187	63011373	582065	11.11	47.1135	1	0	0	0	0	0	0	0	1	0	0	0	0	0	0
2022-08-30	India	7	42430	10.6556	100.894	4.61407	207.83	5.33672	26610	10.1891	30871904	17.2454	25970000	17.0725	1400000000	21.0597	1	1	2.08445e+06	14.55	0	0	0	1	0	141	10042081	400064	13961	1515	63011373	75028447	11.11	31.6594	1	0	0	0	0	0	0	0	1	0	0	0	0	0	0
2022-08-31	Indonesia	8	212550	12.2669	100.894	4.61407	163.864	5.09903	450018	13.017	5516814	15.5233	25970000	17.0725	275501339	19.4341	1	1	2.66431e+06	14.7955	0	0	0	1	0	142	10042081	151710	13961	573	63011373	0	11.11	26.5342	1	0	0	0	0	0	0	0	1	0	0	0	0	0	0
2022-08-23	Japan	9	56007	10.9332	100.894	4.61407	108.314	4.68504	542139	13.2033	3954222	15.1903	25970000	17.0725	125050000	18.6442	1	0	2.52658e+06	14.7424	0	1	1	1	0	3	10042081	6170622	13961	7329	63011373	17008584	11.11	37.5184	1	0	0	0	0	0	0	0	1	0	0	0	0	0	0
2022-08-23	Korea	10	20376	9.92216	100.894	4.61407	125.757	4.83435	218275	12.2935	7024094	15.7649	25970000	17.0725	51844834	17.7638	0	1	2.44391e+06	14.7091	0	0	0	1	0	141	10042081	3507158	13961	1808	63011373	1701701	11.11	11.11	1	0	0	0	0	0	0	0	1	0	0	0	0	0	0
2022-08-23	Malaysia	11	109247	11.6014	100.894	4.61407	128.179	4.85342	219695	12.3	10940782	16.208	25970000	17.0725	33938221	17.3401	1	1	2.52051e+06	14.74	0	0	0	1	0	144	10042081	102571	13961	269	63011373	195089	11.11	11.11	1	0	0	0	0	0	0	0	1	0	0	0	0	0	0
2022-08-23	Mauritius	12	0	0	100.894	4.61407	155.922	5.04936	5882	8.67982	1816769	14.4126	25970000	17.0725	1262523	14.0486	1	0	2.24274e+06	14.6232	0	1	1	1	0	176	10042081	11602	13961	10	63011373	0	11.11	5.56	1	0	0	0	0	0	0	0	1	0	0	0	0	0	0
2022-08-23	New Zealand	13	467315	13.0548	100.894	4.61407	1	0	2713576	14.8138	39985382	17.504	25970000	17.0725	5127400	15.4501	1	0	3.33103e+06	15.0188	0	1	1	1	0	179	10042081	121150	13961	406	63011373	212861	11.11	15.02	1	0	0	0	0	0	0	0	1	0	0	0	0	0	0
2022-08-23	Philippines	14	59637	10.996	100.894	4.61407	147.253	4.99215	167043	12.026	16227126	16.6022	25970000	17.0725	115000000	18.5604	1	0	2.62019e+06	14.7788	0	1	1	1	0	140	10042081	103602	13961	1087	63011373	0	11.11	30.4581	1	0	0	0	0	0	0	0	1	0	0	0	0	0	0
2022-08-23	Qatar	15	112420	11.63	100.894	4.61407	120.868	4.7947	0	0	75068	11.2262	25970000	17.0725	2695122	14.807	1	1	1.80914e+06	14.4084	0	0	0	1	0	154	10042081	20740	13961	0	63011373	0	11.11	32.2239	1	0	0	0	0	0	0	0	1	0	0	0	0	0	0
2022-08-23	Singapore	16	469020	13.0584	100.894	4.61407	125.69	4.83382	423733	12.9569	4797745	15.3837	25970000	17.0725	5640000	15.5454	1	1	2.54598e+06	14.75	0	0	0	1	0	144	10042081	125188	13961	92	63011373	42566	11.11	27.3768	1	0	0	0	0	0	0	0	1	0	0	0	0	0	0
2022-08-23	Solomon Islands	17	3128	8.04847	100.894	4.61407	1	0	17402	9.7644	160013	11.983	25970000	17.0725	724273	13.4929	1	0	3.10584e+06	14.9488	0	1	1	1	0	140	10042081	0	13961	0	63011373	0	11.11	30.9319	1	0	0	0	0	0	0	0	1	0	0	0	0	0	0
2022-08-23	South Africa	18	11319	9.33433	100.894	4.61407	187.011	5.23117	482632	13.087	11948269	16.2961	25970000	17.0725	606000000	20.2224	1	1	2.18742e+06	14.5982	0	0	0	1	0	140	10042081	6813	13961	102	63011373	235218	11.11	13.89	1	0	0	0	0	0	0	0	1	0	0	0	0	0	0
2022-08-23	Sri Lanka	19	26070	10.1686	100.894	4.61407	300.516	5.7055	19268	9.86625	7752382	15.8635	25970000	17.0725	22200000	16.9156	1	0	2.21538e+06	14.6109	0	1	1	1	0	141	10042081	4218	13961	142	63011373	0	11.11	30.559	1	0	0	0	0	0	0	0	1	0	0	0	0	0	0
2022-08-23	Taiwan	20	19546	9.88058	100.894	4.61407	187954	12.144	0	0	283150	12.5537	25970000	17.0725	23260000	16.9622	1	0	2.49793e+06	14.731	0	1	1	1	0	18	10042081	719844	13961	987	63011373	903063	11.11	26.85	1	0	0	0	0	0	0	0	1	0	0	0	0	0	0
2022-08-23	Thailand	21	91013	11.4188	100.894	4.61407	121.718	4.80171	458293	13.0353	4757578	15.3752	25970000	17.0725	71697030	18.088	0	1	2.38719e+06	14.6856	0	0	0	1	0	140	10042081	60639	13961	924	63011373	1193480	11.11	29.0919	1	0	0	0	0	0	0	0	1	0	0	0	0	0	0
2022-08-23	Tonga	22	0	0	100.894	4.61407	154.932	5.04299	0	0	819159	13.616	25970000	17.0725	106858	11.5793	1	0	3.29898e+06	15.0091	0	1	1	1	0	140	10042081	2681	13961	0	63011373	0	11.11	48.6735	1	0	0	0	0	0	0	0	1	0	0	0	0	0	0
2022-08-23	UK	23	115932	11.6608	100.894	4.61407	135.158	4.90645	5476154	15.5159	78699222	18.1811	25970000	17.0725	67508936	18.0278	1	1	1.83975e+06	14.4251	0	0	1	1	0	154	10042081	217313	13961	2158	63011373	512543	11.11	8.60355	1	0	0	0	0	0	0	0	1	0	0	0	0	0	0
2022-08-23	United Arab Emirates	24	226914	12.3323	100.894	4.61407	1	0	0	0	558398	13.2328	25970000	17.0725	9441129	16.0606	1	1	1.69913e+06	14.3456	0	1	0	1	0	140	10042081	23834	13961	6	63011373	0	11.11	28.4706	1	0	0	0	0	0	0	0	1	0	0	0	0	0	0
2022-08-23	USA	25	168849	12.0368	100.894	4.61407	135.824	4.91136	3779722	15.1452	6868691	15.7425	25970000	17.0725	333287557	19.6245	1	1	2.35545e+06	14.6722	0	0	0	1	0	156	10042081	3184143	13961	16429	63011373	5175110	11.11	28.4706	1	0	0	0	0	0	0	0	1	0	0	0	0	0	0
2022-08-23	Vietnam	26	54508	10.9061	100.894	4.61407	178.401	5.18403	8316	9.02606	15589709	16.5621	25970000	17.0725	98186856	18.4024	1	1	2.43923e+06	14.7072	0	0	0	1	0	179	10042081	73107	13961	24	63011373	0	11.11	25.93	1	0	0	0	0	0	0	0	1	0	0	0	0	0	0
[truncated: 26 more columns]
