# Supplementary material for: Australian Tourist Flow: A Gravity Model Approach
Source: Preprints.org preprint supplement (doi:10.20944/preprints202403.1791.v1), 2024-03-29
Supplement: Supplementary file 4 [file Australian Tourist Flow Summary Table.docx]

**Summary Table**

**OLS One Way Fixed Effect Two Way Fixed Effect PPML**

**(1) (2) (3) (4) (5) (6) (7) (8) (9) (10) (11) (12) (13) (14) (15) (16)**

**LN_Tourist~w LN_Tourist~w LN_Tourist~w LN_Tourist~w LN_Tourist~w LN_Tourist~w LN_Tourist~w LN_Tourist~w LN_Tourist~w LN_Tourist~w LN_Tourist~w LN_Tourist~w LN_Tourist~w LN_Tourist~w LN_Tourist~w LN_Tourist~w**

LN_GDPD 20.73*** 21.29*** 22.90*** 5.918 15.21*** 16.07*** 19.60*** 3.602 27.22*** 27.56*** 28.76*** 9.730* 2.767*** 2.909*** 3.103*** 0.917

(4.110) (4.169) (4.405) (4.270) (4.601) (4.695) (4.831) (4.666) (3.540) (3.564) (3.558) (3.840) (0.710) (0.716) (0.772) (0.709)

LN_GDPP -0.494*** -0.491*** -0.506*** -0.441*** -0.488*** -0.487*** -0.505*** -0.446*** -0.255*** -0.265*** -0.285*** -0.186*** -0.0586*** -0.0583*** -0.0592*** -0.0519***

(0.0555) (0.0554) (0.0553) (0.0539) (0.0563) (0.0563) (0.0563) (0.0552) (0.0490) (0.0488) (0.0489) (0.0477) (0.00691) (0.00684) (0.00675) (0.00643)

LN_Mig_D 0.0759*** 0.0755*** 0.0657** 0.0548** 0.0787*** 0.0800*** 0.0720** 0.0519* 0.278*** 0.283*** 0.313*** 0.138*** 0.00944** 0.00932** 0.00827** 0.00699*

(0.0221) (0.0221) (0.0222) (0.0212) (0.0221) (0.0221) (0.0222) (0.0214) (0.0319) (0.0323) (0.0342) (0.0315) (0.00321) (0.00322) (0.00319) (0.00310)

LNDIST 0.281 0.312 0.465 0.614 0.282 0.286 0.404 0.648 0 0 0 0 0.0120 0.0144 0.0321 0.0499

(0.575) (0.576) (0.579) (0.559) (0.573) (0.574) (0.577) (0.561) (.) (.) (.) (.) (0.0845) (0.0847) (0.0855) (0.0830)

LN_Mig_P -0.0639 -0.0602 -0.0433 -0.0683* -0.0760* -0.0726* -0.0536 -0.0686* -0.00208 0.00570 0.0242 0.00314 -0.00921* -0.00875* -0.00699 -0.00961*

(0.0344) (0.0341) (0.0337) (0.0328) (0.0344) (0.0341) (0.0337) (0.0329) (0.0326) (0.0324) (0.0323) (0.0305) (0.00392) (0.00397) (0.00391) (0.00388)

LN_T_POP_D -18.19 -9.846 -2.067 0.178 -24.81 -19.31 -12.66 3.130 -117.0*** -115.9*** -130.6*** -45.31** -2.054 -1.268 -0.553 -0.00495

(15.97) (15.97) (16.24) (14.10) (16.01) (16.09) (16.44) (14.32) (15.29) (15.57) (16.83) (14.21) (1.310) (1.319) (1.353) (1.199)

LN_TPOP_P 0.219*** 0.235*** 0.233*** 0.250*** 0.227*** 0.240*** 0.234*** 0.253*** 1.157*** 1.176*** 1.197*** 1.111*** 0.0246*** 0.0262*** 0.0260*** 0.0276***

(0.0467) (0.0474) (0.0468) (0.0454) (0.0467) (0.0473) (0.0467) (0.0456) (0.205) (0.205) (0.206) (0.198) (0.00514) (0.00528) (0.00507) (0.00499)

COL 0.233 0.285 0.295 0.226 0.235 0.287 0.296 0.222 6.666*** 7.571*** 8.038*** 5.932*** 0.0222 0.0264 0.0272 0.0208

(0.279) (0.280) (0.280) (0.271) (0.278) (0.279) (0.279) (0.272) (0.580) (0.705) (0.710) (0.697) (0.0177) (0.0177) (0.0175) (0.0169)

CONT 1.125*** 1.127*** 1.201*** 1.174*** 1.123*** 1.122*** 1.192*** 1.177*** 8.150*** 8.279*** 8.769*** 6.618*** 0.122*** 0.122*** 0.129*** 0.127***

(0.206) (0.206) (0.207) (0.201) (0.206) (0.206) (0.207) (0.202) (0.773) (0.773) (0.777) (0.766) (0.0212) (0.0211) (0.0216) (0.0211)

LANDLOCK 0 0 0 0 0 0 0 0 0 0 0 0

(.) (.) (.) (.) (.) (.) (.) (.) (.) (.) (.) (.)

COMLANG -0.0133*** -0.0128*** -0.0146*** -0.0121*** -0.0130*** -0.0126*** -0.0145*** -0.0121*** 0.0803*** 0.0820*** 0.0860*** 0.0653*** -0.00125*** -0.00120*** -0.00136*** -0.00114***

(0.00199) (0.00201) (0.00199) (0.00193) (0.00198) (0.00200) (0.00199) (0.00194) (0.0101) (0.0101) (0.0102) (0.00995) (0.000162) (0.000168) (0.000168) (0.000157)

COV_D -2.698*** -2.853*** -2.958*** 0.0648 -2.750*** -2.880*** -2.908*** 0.000127 -0.101 -0.163 0.106 1.198** -0.276*** -0.288*** -0.296*** 0.0276

(0.417) (0.414) (0.412) (0.502) (0.421) (0.420) (0.419) (0.514) (0.425) (0.425) (0.436) (0.432) (0.0448) (0.0460) (0.0462) (0.0365)

COVCASES_D 0.000000231*** 0.000000279*** 0.000000262*** 2.55e-08***

(4.20e-08) (4.63e-08) (3.37e-08) (4.78e-09)

COVCASES_P -3.33e-08 -4.43e-08 -5.31e-08 -1.36e-09

(8.49e-08) (8.48e-08) (6.39e-08) (1.05e-08)

COVMORT_D 0.000150*** 0.000194*** 0.000191*** 0.0000167***

(0.0000356) (0.0000393) (0.0000287) (0.00000395)

COVMORT_P -0.0000227* -0.0000227* -0.0000210** -0.00000239

(0.0000103) (0.0000102) (0.00000810) (0.00000214)

COVVACC_D 1.72e-08** 2.18e-08*** 2.81e-08*** 1.99e-09**

(5.67e-09) (5.92e-09) (4.46e-09) (7.62e-10)

COVVACC_P -9.49e-09*** -9.12e-09*** -1.45e-09 -9.67e-10*

(2.44e-09) (2.44e-09) (1.84e-09) (3.99e-10)

COV_STR_D -0.0560*** -0.0575*** -0.0489*** -0.00665***

(0.00656) (0.00723) (0.00520) (0.00107)

COV_STR_P -0.00514 -0.00463 -0.0110** -0.000251

(0.00479) (0.00488) (0.00361) (0.000915)

Month_D No No No No Yes Yes Yes Yes Yes Yes Yes Yes Yes Yes Yes Yes

Country_D No No No No No No No No No Yes Yes Yes Yes Yes Yes Yes

_cons 221.1 75.42 -66.64 -29.22 360.3 262.1 131.2 -69.07 1839.7*** 1816.7*** 2060.5*** 702.5** 24.45 10.31 -3.016 -2.579

(271.7) (272.3) (278.4) (237.8) (272.9) (274.9) (282.1) (240.5) (254.7) (260.1) (282.8) (231.9) (22.91) (23.11) (24.02) (20.42)

N 1449 1453 1452 1453 1449 1453 1452 1453 1449 1453 1452 1453 1449 1453 1452 1453

R-sq 0.381 0.379 0.379 0.414 0.391 0.389 0.388 0.416 0.704 0.703 0.700 0.723 0.362 0.360 0.358 0.394

adj. R-sq 0.375 0.374 0.374 0.409 0.380 0.379 0.377 0.406 0.694 0.693 0.690 0.714

Standard errors in parentheses

* p<0.05, ** p<0.01, *** p<0.001
