# Supplementary material for: Australian Tourist Flow: A Gravity Model Approach
Source: Preprints.org preprint supplement (doi:10.20944/preprints202403.1791.v1), 2024-03-29
Supplement: Supplementary file 5 [file Crossref.docx]

Adeola, O., & Evans, O. (2020). ICT, infrastructure, and tourism development in Africa. [*Tourism Economics*, *26*(1), 97-11[CrossRef]](#_top)

Agiomirgianakis, G., Serenis, D., & Tsounis, N. (2014). Exchange rate volatility and tourist flows into Turkey. [*Journal of Economic Integration*, 700-72[CrossRef]](#_top)

Alderighi, M., & Gaggero, A. A. (2019). Flight availability and international tourism flows. [*Annals of Tourism Research*, *79*, 10264[CrossRef]](#_top)

Alexander, D. W., & Merkert, R. (2017). Challenges to domestic air freight in Australia: Evaluating air traffic markets with gravity modelling. [*Journal of Air Transport Management*, *61*, 41-5[CrossRef]](#_top)

Altaf, N. (2021). Modelling the international tourist arrivals in India. [*Tourism Planning & Development*, *18*(6), 699-70[CrossRef]](#_top)

Alvarez‐Diaz, M., D'Hombres, B., Ghisetti, C., & Pontarollo, N. (2020). Analysing domestic tourism flows at the provincial level in Spain by using spatial gravity models. *International Journal of Tourism Research, 22(4),* 403-41[CrossRef]

Artigas, E. M., Yrigoyen, C. C., Moraga, E. T., & Villalón, C. B. (2017). Determinants of trust towards tourist destinations. *Journal of Destination Marketing & Management, 6(4),* 327-33[CrossRef]

Balli, F., Balli, H. O., & Louis, R. J. (2016). The impacts of immigrants and institutions on bilateral tourism flows. *Tourism Management, 52,* 221-22[CrossRef]

Bao, J., & Xie, H. J. (2019). Determinants of domestic tourism demand for Guilin*. Journal of China Tourism Research, 15(1),* 1-1[CrossRef]

Bazargani, R. H. Z., & Kiliç, H. (2021). Tourism competitiveness and tourism sector performance: Empirical insights from new data*. Journal of Hospitality and Tourism Management,* *46,* 73-8[CrossRef]

Bento, J. P. C. (2014). The determinants of international academic tourism demand in Europe. *Tourism Economics,* *20(3),* 611-62[CrossRef]

Buigut, S. (2018). Effect of terrorism on demand for tourism in Kenya: A comparative analysis. *Tourism and Hospitality Research,* *18(1),* 28-3[CrossRef]

Corne, A., & Peypoch, N. (2020). On the determinants of tourism performance*. Annals of Tourism Research,* *85,* 10305[CrossRef]

Cró, S., & Martins, A. M. (2020). Foreign Direct Investment in the tourism sector: The case of France. *Tourism Management Perspectives, 33,* 10061[CrossRef]

Czernek, K. (2017). Tourism features as determinants of knowledge transfer in the process of tourist cooperation. *Current Issues in Tourism,* *20(2),* 204-220.

de la Peña, M. R., Núñez-Serrano, J. A., Turrión, J., & Velázquez, F. J. (2019). A new tool for the analysis of the international competitiveness of tourist destinations based on performance. *Journal of Travel Research,* *58(2),* 207-22[CrossRef]

De Vita, G. (2014). The long-run impact of exchange rate regimes on international tourism flows. *Tourism Management,* *45,* 226-23[CrossRef]

Deng, T., & Hu, Y. (2019). Modelling China’s outbound tourist flow to the ‘Silk Road’: A spatial econometric approach. *Tourism Economics, 25(8),* 1167-118[CrossRef]

Dropsy, V., Montet, C., & Poirine, B. (2020). Tourism, insularity, and remoteness: A gravity-based approach. *Tourism Economics, 26(5),* 792-80[CrossRef]

Durbarry, R. (2008). Tourism taxes: Implications for tourism demand in the UK. *Review of Development Economics, 12(1),* 21-3[CrossRef]

Duro, J. A., & Turrion-Prats, J. (2019). Tourism seasonality worldwide. *Tourism Management Perspectives, 31,* 38-5[CrossRef]

Eilat, Y., & Einav*, L. (2004). Determinants of international tourism: a three-dimensional panel data analysis. *Applied Economics, 36(12),* 1315-132[CrossRef]

Eryiğit, M., Kotil, E., & Eryiğit, R. (2010). Factors affecting international tourism flows to Turkey: A gravity model approach. *Tourism Economics, 16(3),* 585-59[CrossRef]

Etzo, I., Massidda, C., & Piras, R. (2014). Migration and outbound tourism: Evidence from Italy. *Annals of Tourism Research, 48,* 235-24[CrossRef]

Farzanegan, M. R., Gholipour, H. F., Feizi, M., Nunkoo, R., & Andargoli, A. E. (2021). International tourism and outbreak of coronavirus (COVID-19): A cross-country analysis. *Journal of Travel Research, 60(3),* 687-69[CrossRef]

Fernández, J. A. S., Azevedo, P. S., Martín, J. M. M., & Martín, J. A. R. (2020). Determinants of tourism destination competitiveness in the countries most visited by international tourists: Proposal of a synthetic index. *Tourism Management Perspectives, 33,* 10058[CrossRef]

Fourie, J., & Santana-Gallego, M. (2011). The impact of mega-sport events on tourist arrivals. *Tourism management, 32(6),* 1364-1370.

Fourie, J., & Santana-Gallego, M. (2013). The determinants of African tourism. *Development Southern Africa, 30(3),* 347-36[CrossRef]

Fourie, J., Rosselló, J., & Santana‐Gallego, M. (2015). Religion, religious diversity and tourism. *Kyklos, 68(1),* 51-6[CrossRef]

Ghalia, T., Fidrmuc, J., Samargandi, N., & Sohag, K. (2019). Institutional quality, political risk and tourism. *Tourism Management Perspectives, 32,* 10057[CrossRef]

Ghani, G. M. (2016). Tourist arrivals to Malaysia from Muslim countries. Tourism *Management Perspectives, 20,* 1-[CrossRef]

Ghosh, S. (2021). Inbound Australian tourism demand from Asia: a panel gravity model. *Journal of Economic Studies, 48(7),* 1388-1400.

Ghosh, S. (2022). Modelling inbound international tourism demand in Australia: Lessons from the pandemics.*International Journal of Tourism Research, 24(1*), 71-8[CrossRef]

Giambona, F., & Grassini, L. (2020). Tourism attractiveness in Italy: Regional empirical evidence using a pairwise comparisons modelling approach. *International Journal of Tourism Research, 22(1),* 26-4[CrossRef]

Gidebo, H. B. (2021). Factors determining international tourist flow to tourism destinations: A systematic review. *Journal of Hospitality Management and Tourism, 12(1),* 9-1[CrossRef]5

Gil-Pareja, S., Llorca-Vivero, R., & Martínez-Serrano, J. A. (2007). The impact of embassies and consulates on tourism. *Tourism Management, 28(2),* 355-360.

Groizard, J. L., & Santana-Gallego, M. (2018). The destruction of cultural heritage and international tourism: The case of the Arab countries. *Journal of Cultural Heritage, 33,* 285-29[CrossRef]

Grosche, T., Rothlauf, F., & Heinzl, A. (2007). Gravity models for airline passenger volume estimation. *Journal of Air Transport Management, 13(4),* 175-18[CrossRef]

Gutiérrez, A., & Miravet, D. (2016). The determinants of tourist use of public transport at the destination. *Sustainability, 8(9),* 90[CrossRef]

Habibi, F. (2017). The determinants of inbound tourism to Malaysia: A panel data analysis. *Current Issues in Tourism, 20(9),* 909-930.

Harb, G., & Bassil, C. (2020). Gravity analysis of tourism flows and the ‘multilateral resistance to tourism’. *Current Issues in Tourism, 23(6),* 666-67[CrossRef]

Karl, M. (2018). Risk and uncertainty in travel decision-making: Tourist and destination perspective. *Journal of Travel Research, 57(1),* 129-14[CrossRef]

Khadaroo, J., & Seetanah, B. (2008). The role of transport infrastructure in international tourism development: A gravity model approach. *Tourism management, 29(5),* 831-840.

Khalid, U., Okafor, L. E., & Aziz, N. (2020). Armed conflict, military expenditure and international tourism. *Tourism Economics, 26(4),* 555-57[CrossRef]

Khalid, U., Okafor, L. E., & Sanusi, O. I. (2022). Exploring diverse sources of linguistic influence on international tourism flows. *Journal of Travel Research, 61(3),* 696-71[CrossRef]

Khan, K., Su, C. W., Xiao, Y. D., Zhu, H., & Zhang, X. (2021). Trends in tourism under economic uncertainty. *Tourism Economics, 27(4),* 841-85[CrossRef]

Khoshnevis Yazdi, S., & Khanalizadeh, B. (2017). Tourism demand: A panel data approach. *Current Issues in Tourism, 20(8),* 787-800.

Kim, Y. R., Liu, A., Stienmetz, J., & Chen, Y. (2022). Visitor flow spillover effects on attraction demand: A spatial econometric model with multisource data. *Tourism Management, 88,* 10443[CrossRef]

Li, K. X., Jin, M., & Shi, W. (2018). Tourism as an important impetus to promoting economic growth: A critical review. *Tourism Management Perspectives, 26,* 135-14[CrossRef]

Li, Z., Huo, T., Shao, Y., Zhao, Q., & Huo, M. (2022). Inbound tourism–a bibliometric review of SSCI articles (1993–2021). *Tourism Review, 77(1),* 322-33[CrossRef]

Lim, C., Zhu, L., & Koo, T. T. (2019). Urban redevelopment and tourism growth: Relationship between tourism infrastructure and international visitor flows. *International Journal of Tourism Research, 21(2),* 187-19[CrossRef]

Lorde, T., Li, G., & Airey, D. (2016). Modeling Caribbean tourism demand: an augmented gravity approach. *Journal of Travel Research, 55(7),* 946-95[CrossRef]

Majewska, J. (2015). Inter-regional agglomeration effects in tourism in Poland. *Tourism Geographies, 17(3),* 408-43[CrossRef]

Marrocu, E., Paci, R., & Zara, A. (2015). Micro-economic determinants of tourist expenditure: A quantile regression approach. *Tourism Management, 50,* 13-30.

Martins, L. F., Gan, Y., & Ferreira-Lopes, A. (2017). An empirical analysis of the influence of macroeconomic determinants on World tourism demand. *Tourism management, 61,* 248-260.

Massidda, C., Etzo, I., & Piras, R. (2015). Migration and inbound tourism: an Italian perspective*. Current Issues in Tourism, 18(12),* 1152-117[CrossRef]

Morley, C., Rosselló, J., & Santana-Gallego, M. (2014). Gravity models for tourism demand: theory and use. *Annals of tourism research, 48,* 1-10.

Muñoz, C., Álvarez, A., & Baños, J. F. (2023). Modelling the effect of weather on tourism: does it vary across seasons? *Tourism Geographies, 25(1),* 265-28[CrossRef]

Nguyen, J., & Valadkhani, A. (2020). Dynamic responses of tourist arrivals in Australia to currency fluctuations. *Journal of Hospitality and Tourism Management, 45,* 71-7[CrossRef]

Okafor, L. E., Khalid, U., & Burzynska, K. (2022). The effect of migration on international tourism flows: the role of linguistic networks and common languages. *Journal of Travel Research, 61(4),* 818-83[CrossRef]

Okafor, L. E., Khalid, U., & Then, T. (2018). Common unofficial language, development and international tourism. *Tourism Management, 67,* 127-13[CrossRef]

Okafor, L. E., Tan, C. M., & Khalid, U. (2021). Does panda diplomacy promote Chinese outbound tourism flows?. *Journal of Hospitality and Tourism Management, 49,* 54-6[CrossRef]

Paniagua, J., Peiró-Palomino, J., & Santana-Gallego, M. (2022). Does happiness drive tourism decisions?. *Economic Modelling, 111,* 10582[CrossRef]

Panzera, E., de Graaff, T., & de Groot, H. L. (2021). European cultural heritage and tourism flows: The magnetic role of superstar World Heritage Sites. *Papers in Regional Science, 100(1),* 101-12[CrossRef]

Park, Y. S. (2016). Determinants of Korean Outbound Tourism. *Journal of Economics, Business and Management, 4(2),* 92-9[CrossRef]

Peng, B., Song, H., Crouch, G. I., & Witt, S. F. (2015). A meta-analysis of international tourism demand elasticities. *Journal of Travel Research, 54(5),* 611-63[CrossRef]

Pham, T. D. (2020). Tourism productivity theory and measurement for policy implications: The case of Australia. *Journal of Travel Research, 59(2),* 247-26[CrossRef]

Pham, T. D., Nghiem, S., & Dwyer, L. (2017). The determinants of Chinese visitors to Australia: A dynamic demand analysis. *Tourism Management, 63,* 268-27[CrossRef]

Pompili, T., Pisati, M., & Lorenzini, E. (2019). Determinants of international tourist choices in Italian provinces: A joint demand–supply approach with spatial effects. *Papers in Regional Science, 98(6),* 2251-227[CrossRef]

Prideaux, B. (2005). Factors affecting bilateral tourism flows. *Annals of Tourism Research, 32(3),* 780-80[CrossRef]

Provenzano, D. (2020). The migration–tourism nexus in the EU2[CrossRef] *Tourism Economics, 26(8),* 1374-139[CrossRef]

Provenzano, D., & Baggio, R. (2017). The contribution of human migration to tourism: The VFR travel between the EU 28 member states*. International Journal of Tourism Research, 19(4),* 412-420.

Rosselló, J., Becken, S., & Santana-Gallego, M. (2020). The effects of natural disasters on international tourism: A global analysis. *Tourism management, 79,* 104080.

Rosselló-Nadal, J. (2014). How to evaluate the effects of climate change on tourism. *Tourism Management, 42,* 334-340.

Rosselló-Nadal, J., & He, J. (2020). Tourist arrivals versus tourist expenditures in modeling tourism demand*. Tourism Economics, 26(8),* 1311-132[CrossRef]

Santana-Gallego, M., & Paniagua, J. (2022). Tourism and migration: Identifying the channels with gravity models. *Tourism Economics, 28(2),* 394-41[CrossRef]

Santana-Gallego, M., Ledesma-Rodríguez, F. J., & Pérez-Rodríguez, J. V. (2016). International trade and tourism flows: An extension of the gravity model. *Economic Modelling, 52,* 1026-103[CrossRef]

Santeramo, F. G., & Morelli, M. (2016). Modelling tourism flows through gravity models: A quantile regression approach. *Current issues in Tourism, 19(11),* 1077-108[CrossRef]

Santos, A., & Cincera, M. (2018). Tourism demand, low cost carriers and European institutions: The case of Brussels. *Journal of transport geography, 73,* 163-17[CrossRef]

Seetanah, B., Sannassee, R., & Rojid, S. (2015). The impact of relative prices on tourism demand for Mauritius: An empirical analysis. *Development Southern Africa, 32(3),* 363-37[CrossRef]

Shafiullah, M., Okafor, L. E., & Khalid, U. (2019). Determinants of international tourism demand: Evidence from Australian states and territories. *Tourism Economics, 25(2),* 274-29[CrossRef]

Sharma, P., & Nayak, J. K. (2019). Understanding memorable tourism experiences as the determinants of tourists' behaviour*. International Journal of Tourism Research, 21(4),* 504-51[CrossRef]

Smolčić Jurdana, D., & Soldić Frleta, D. (2017). Satisfaction as a determinant of tourist expenditure. *Current Issues in Tourism, 20(7),* 691-70[CrossRef]

Solarin, S. A. (2014). Tourist arrivals and macroeconomic determinants of CO2 emissions in Malaysia. *Anatolia, 25(2),* 228-24[CrossRef]

Takahashi, K. (2019). Tourism demand and migration nexus in Small Island Developing States (SIDS): applying the tourism demand model in the Pacific region. *Island Studies Journal, 14(1),* 163-17[CrossRef]

Tavares, J. M., & Leitao, N. C. (2017). The determinants of international tourism demand for Brazil. *Tourism Economics, 23(4),* 834-84[CrossRef]

Turrión-Prats, J., & Duro, J. A. (2018). Tourist seasonality and the role of markets. *Journal of Destination Marketing & Management, 8,* 23-3[CrossRef]

Ulucak, R., Yücel, A. G., & İlkay, S. Ç. (2020). Dynamics of tourism demand in Turkey: Panel data analysis using gravity model. *Tourism Economics, 26(8),* 1394-141[CrossRef]

Van De Vijver, E., Derudder, B., O’Connor, K., & Witlox, F. (2016). Shifting patterns and determinants of Asia-Pacific tourism to Australia, 1990–2010*. Asia Pacific Journal of Tourism Research, 21(12),* 1357-137[CrossRef]

Velasquez, M. E. B., & Oh, J. (2013). What determines international tourist arrivals to Peru? A gravity approach. *International Area Studies Review, 16(4),* 357-36[CrossRef]

Vietze, C. (2012). Cultural effects on inbound tourism into the USA: a gravity approach. *Tourism Economics, 18(1),* 121-13[CrossRef]

Vítová, P., Harmáček, J., & Opršal, Z. (2019). Determinants of tourism flows in small island developing states (SIDS). *Island studies journal, 14(2),* 3-2[CrossRef]

Waqas-Awan, A., Rosselló-Nadal, J., & Santana-Gallego, M. (2021). New insights into the role of personal income on international tourism. *Journal of Travel Research, 60(4),* 799-80[CrossRef]

Xu, B., & Dong, D. (2020). Evaluating the impact of air pollution on China’s inbound tourism: A gravity model approach. *Sustainability, 12(4),* 145[CrossRef]

Xu, L., Wang, S., Li, J., Tang, L., & Shao, Y. (2019). Modelling international tourism flows to China: A panel data analysis with the gravity model. *Tourism Economics, 25(7),* 1047-106[CrossRef]

Yang, Y., & Wong, K. K. (2012). The influence of cultural distance on China inbound tourism flows: A panel data gravity model approach. *Asian Geographer, 29(1),* 21-3[CrossRef]

Yang, Y., Liu, H., & Li, X. (2019). The world is flatter? Examining the relationship between cultural distance and international tourist flows. *Journal of Travel Research, 58(2),* 224-240.

Yerdelen Tatoglu, F., & Gul, H. (2020). Analysis of tourism demand using a multi-dimensional panel gravity model. *Tourism Review, 75(2),* 433-44[CrossRef]

Zhang, Y., & Zhang, A. (2016). Determinants of air passenger flows in China and gravity model: deregulation, LCCs, and high-speed rail*. Journal of Transport Economics and Policy (JTEP), 50(3),* 287-30[CrossRef]

Zhang, Y., Li, X., & Wu, T. (2019). The impacts of cultural values on bilateral international tourist flows: A panel data gravity model. *Current Issues in Tourism, 22(8),* 967-98[CrossRef]

Zhu, L., Lim, C., Xie, W., & Wu, Y. (2018). Modelling tourist flow association for tourism demand forecasting. *Current Issues in Tourism, 21(8),* 902-91[CrossRef]
