# Supplementary material for: Australian Tourist Flow: A Gravity Model Approach
Source: Preprints.org preprint supplement (doi:10.20944/preprints202403.1791.v1), 2024-03-29
Supplement: Supplementary file 6 [file OLS_Aus_Tourism.docx]

**OLS**

**(1) (2) (3) (4)**

**LN_Tourist~w LN_Tourist~w LN_Tourist~w LN_Tourist~w**

LN_GDPD 20.73*** 21.29*** 22.90*** 5.918

(4.110) (4.169) (4.405) (4.270)

LN_GDPP -0.494*** -0.491*** -0.506*** -0.441***

(0.0555) (0.0554) (0.0553) (0.0539)

LN_Mig_D 0.0759*** 0.0755*** 0.0657** 0.0548**

(0.0221) (0.0221) (0.0222) (0.0212)

LN_Mig_P -0.0639 -0.0602 -0.0433 -0.0683*

(0.0344) (0.0341) (0.0337) (0.0328)

LNDIST 0.281 0.312 0.465 0.614

(0.575) (0.576) (0.579) (0.559)

LN_T_POP_D -18.19 -9.846 -2.067 0.178

(15.97) (15.97) (16.24) (14.10)

LN_TPOP_P 0.219*** 0.235*** 0.233*** 0.250***

(0.0467) (0.0474) (0.0468) (0.0454)

COL 0.233 0.285 0.295 0.226

(0.279) (0.280) (0.280) (0.271)

CONT 1.125*** 1.127*** 1.201*** 1.174***

(0.206) (0.206) (0.207) (0.201)

LANDLOCK 0 0 0 0

(.) (.) (.) (.)

COMLANG -0.0133*** -0.0128*** -0.0146*** -0.0121***

(0.00199) (0.00201) (0.00199) (0.00193)

COV_D -2.698*** -2.853*** -2.958*** 0.0648

(0.417) (0.414) (0.412) (0.502)

COVCASES_D 0.000000231***

(4.20e-08)

COVCASES_P -3.33e-08

(8.49e-08)

COVMORT_D 0.000150***

(0.0000356)

COVMORT_P -0.0000227*

(0.0000103)

COVVACC_D 1.72e-08**

(5.67e-09)

COVVACC_P -9.49e-09***

(2.44e-09)

COV_STR_D -0.0560***

(0.00656)

COV_STR_P -0.00514

(0.00479)

_cons 221.1 75.42 -66.64 -29.22

(271.7) (272.3) (278.4) (237.8)

N 1449 1453 1452 1453

R-sq 0.381 0.379 0.379 0.414

adj. R-sq 0.375 0.374 0.374 0.409

Standard errors in parentheses

* p<0.05, ** p<0.01, *** p<0.001
