# Supplementary material for: Australian Tourist Flow: A Gravity Model Approach
Source: Preprints.org preprint supplement (doi:10.20944/preprints202403.1791.v1), 2024-03-29
Supplement: Supplementary file 7 [file Oneway&Twoway_Aus_Tourism.docx]

**One Way Fixed Effect Two Way Fixed Effect**

**(1) (2) (3) (4) (5) (6) (7) (8)**

**LN_Tourist~w LN_Tourist~w LN_Tourist~w LN_Tourist~w LN_Tourist~w LN_Tourist~w LN_Tourist~w LN_Tourist~w**

LN_GDPD 15.21*** 16.07*** 19.60*** 3.602 27.22*** 27.56*** 28.76*** 9.730*

(4.601) (4.695) (4.831) (4.666) (3.540) (3.564) (3.558) (3.840)

LN_GDPP -0.488*** -0.487*** -0.505*** -0.446*** -0.255*** -0.265*** -0.285*** -0.186***

(0.0563) (0.0563) (0.0563) (0.0552) (0.0490) (0.0488) (0.0489) (0.0477)

LN_Mig_D 0.0787*** 0.0800*** 0.0720** 0.0519* 0.278*** 0.283*** 0.313*** 0.138***

(0.0221) (0.0221) (0.0222) (0.0214) (0.0319) (0.0323) (0.0342) (0.0315)

LNDIST 0.282 0.286 0.404 0.648 0 0 0 0

(0.573) (0.574) (0.577) (0.561) (.) (.) (.) (.)

LN_Mig_P -0.0760* -0.0726* -0.0536 -0.0686* -0.00208 0.00570 0.0242 0.00314

(0.0344) (0.0341) (0.0337) (0.0329) (0.0326) (0.0324) (0.0323) (0.0305)

LN_T_POP_D -24.81 -19.31 -12.66 3.130 -117.0*** -115.9*** -130.6*** -45.31**

(16.01) (16.09) (16.44) (14.32) (15.29) (15.57) (16.83) (14.21)

LN_TPOP_P 0.227*** 0.240*** 0.234*** 0.253*** 1.157*** 1.176*** 1.197*** 1.111***

(0.0467) (0.0473) (0.0467) (0.0456) (0.205) (0.205) (0.206) (0.198)

COL 0.235 0.287 0.296 0.222 6.666*** 7.571*** 8.038*** 5.932***

(0.278) (0.279) (0.279) (0.272) (0.580) (0.705) (0.710) (0.697)

CONT 1.123*** 1.122*** 1.192*** 1.177*** 8.150*** 8.279*** 8.769*** 6.618***

(0.206) (0.206) (0.207) (0.202) (0.773) (0.773) (0.777) (0.766)

LANDLOCK 0 0 0 0 0 0 0 0

(.) (.) (.) (.) (.) (.) (.) (.)

COMLANG -0.0130*** -0.0126*** -0.0145*** -0.0121*** 0.0803*** 0.0820*** 0.0860*** 0.0653***

(0.00198) (0.00200) (0.00199) (0.00194) (0.0101) (0.0101) (0.0102) (0.00995)

COV_D -2.750*** -2.880*** -2.908*** 0.000127 -0.101 -0.163 0.106 1.198**

(0.421) (0.420) (0.419) (0.514) (0.425) (0.425) (0.436) (0.432)

COVCASES_D 0.000000279*** 0.000000262***

(4.63e-08) (3.37e-08)

COVCASES_P -4.43e-08 -5.31e-08

(8.48e-08) (6.39e-08)

COVMORT_D 0.000194*** 0.000191***

(0.0000393) (0.0000287)

COVMORT_P -0.0000227* -0.0000210**

(0.0000102) (0.00000810)

COVVACC_D 2.18e-08*** 2.81e-08***

(5.92e-09) (4.46e-09)

COVVACC_P -9.12e-09*** -1.45e-09

(2.44e-09) (1.84e-09)

COV_STR_D -0.0575*** -0.0489***

(0.00723) (0.00520)

COV_STR_P -0.00463 -0.0110**

(0.00488) (0.00361)

Month_D Yes Yes Yes Yes Yes Yes Yes Yes

Country_D Yes Yes Yes Yes Yes Yes Yes Yes

_cons 360.3 262.1 131.2 -69.07 1839.7*** 1816.7*** 2060.5*** 702.5**

(272.9) (274.9) (282.1) (240.5) (254.7) (260.1) (282.8) (231.9)

N 1449 1453 1452 1453 1449 1453 1452 1453

R-sq 0.391 0.389 0.388 0.416 0.704 0.703 0.700 0.723

adj. R-sq 0.380 0.379 0.377 0.406 0.694 0.693 0.690 0.714

Standard errors in parentheses

* p<0.05, ** p<0.01, *** p<0.001
