# Supplementary material for: Australian Tourist Flow: A Gravity Model Approach
Source: Preprints.org preprint supplement (doi:10.20944/preprints202403.1791.v1), 2024-03-29
Supplement: Supplementary file 8 [file PPML_Aus_Tourism.docx]

**PPML**

**(1) (2) (3) (4)**

**LN_Tourist~w LN_Tourist~w LN_Tourist~w LN_Tourist~w**

LN_GDPD 2.767*** 2.909*** 3.103*** 0.917

(0.710) (0.716) (0.772) (0.709)

LN_GDPP -0.0586*** -0.0583*** -0.0592*** -0.0519***

(0.00691) (0.00684) (0.00675) (0.00643)

LN_Mig_D 0.00944** 0.00932** 0.00827** 0.00699*

(0.00321) (0.00322) (0.00319) (0.00310)

LN_Mig_P -0.00921* -0.00875* -0.00699 -0.00961*

(0.00392) (0.00397) (0.00391) (0.00388)

LNDIST 0.0120 0.0144 0.0321 0.0499

(0.0845) (0.0847) (0.0855) (0.0830)

LN_T_POP_D -2.054 -1.268 -0.553 -0.00495

(1.310) (1.319) (1.353) (1.199)

LN_TPOP_P 0.0246*** 0.0262*** 0.0260*** 0.0276***

(0.00514) (0.00528) (0.00507) (0.00499)

COL 0.0222 0.0264 0.0272 0.0208

(0.0177) (0.0177) (0.0175) (0.0169)

CONT 0.122*** 0.122*** 0.129*** 0.127***

(0.0212) (0.0211) (0.0216) (0.0211)

COMLANG -0.00125*** -0.00120*** -0.00136*** -0.00114***

(0.000162) (0.000168) (0.000168) (0.000157)

COV_D -0.276*** -0.288*** -0.296*** 0.0276

(0.0448) (0.0460) (0.0462) (0.0365)

COVCASES_D 2.55e-08***

(4.78e-09)

COVCASES_P -1.36e-09

(1.05e-08)

COVMORT_D 0.0000167***

(0.00000395)

COVMORT_P -0.00000239

(0.00000214)

COVVACC_D 1.99e-09**

(7.62e-10)

COVVACC_P -9.67e-10*

(3.99e-10)

COV_STR_D -0.00665***

(0.00107)

COV_STR_P -0.000251

(0.000915)

_cons 24.45 10.31 -3.016 -2.579

(22.91) (23.11) (24.02) (20.42)

N 1449 1453 1452 1453

R-sq 0.362 0.360 0.358 0.394

adj. R-sq

Standard errors in parentheses

* p<0.05, ** p<0.01, *** p<0.001
