# Supplementary material for: Australian Tourist Flow: A Gravity Model Approach
Source: Preprints.org preprint supplement (doi:10.20944/preprints202403.1791.v1), 2024-03-29
Supplement: Supplementary file 10 [file monthly-international-may-2023-2019-comparison (1).xlsx]

## Sheet: Index
Monthly international travel estimates for 2023 compared to 2019
2023-05-01
Table 1	Trips, visitor nights and expenditure by country of residence
Table 2	Trips, visitor nights and expenditure by main purpose of visit
Table 3	Trips, visitor nights and regional expenditure by state/territory visited
Table 4	Trips, visitor nights and regional expenditure by capital/regional
RSE	Relative standard errors for estimates
Note: 'Trips' were previously referred to as 'Visitors'.

## Sheet: TABLE 1
Monthly international travel estimates by country of residence
January
	Trips ('000)		Change		Nights ('000)		Change		Spend in Australia ($M)(a)		Change		Total trip spend ($M)(a)(b)		Change
Country of residence	2019-01-01	2023-01-01	'000	%	2019-01-01	2023-01-01	'000	%	2019-01-01	2023-01-01	$M	%	2019-01-01	2023-01-01	$M	%
New Zealand	96	58	-38	-40	1342	1096	-246	-18	131	107	-23	-18	208	196	-12	-6
Japan	32	9	-23	-72	1077	np	np	np	103	np	np	np	165	110	-55	-33
Hong Kong	13	np	np	np	772	np	np	np	94	np	np	np	111	np	np	np
Singapore	17	np	np	np	519	np	np	np	93	np	np	np	114	np	np	np
Malaysia	16	6	-10	-61	1091	349	-742	-68	127	40	-86	-68	149	54	-96	-64
Indonesia	14	7	-8	-54	977	324	-652	-67	np	27	np	np	119	38	-81	-68
Taiwan	12	np	np	np	1455	np	np	np	90	np	np	np	116	np	np	np
Thailand	7	np	np	np	543	np	np	np	33	np	np	np	46	np	np	np
Korea	26	16	-11	-40	1115	784	-330	-30	105	117	12	11	154	149	-5	-4
China	100	14	-86	-86	8817	1208	-7609	-86	1601	203	-1398	-87	1741	261	-1480	-85
India	31	19	-12	-39	2839	1790	-1050	-37	224	np	np	np	277	np	np	np
Other Asia	34	24	-11	-31	2499	1680	-820	-33	222	152	-69	-31	276	191	-85	-31
United States of America	64	48	-16	-25	1258	843	-416	-33	193	133	-59	-31	379	391	12	3
Canada	18	12	-6	-35	481	487	6	1	51	54	2	4	96	102	6	6
United Kingdom	82	53	-28	-35	2770	np	np	np	254	153	-101	-40	480	338	-142	-30
Germany	24	np	np	np	849	np	np	np	142	np	np	np	250	np	np	np
Scandinavia	13	np	np	np	392	np	np	np	51	np	np	np	86	np	np	np
France	12	np	np	np	490	np	np	np	38	np	np	np	64	np	np	np
Italy	8	np	np	np	306	np	np	np	30	np	np	np	55	np	np	np
Netherlands	6	np	np	np	252	np	np	np	23	np	np	np	36	np	np	np
Switzerland	6	np	np	np	166	np	np	np	24	np	np	np	41	np	np	np
Other Europe	28	18	-10	-35	1208	np	np	np	99	68	-31	-31	162	136	-26	-16
Other Countries	54	33	-21	-40	2236	1518	-718	-32	198	np	np	np	279	249	-29	-11
Total	716	385	-332	-46	33455	17186	-16269	-49	4029	1859	-2170	-54	5403	3017	-2386	-44
February
	Trips ('000)		Change		Nights ('000)		Change		Spend in Australia ($M)(a)		Change		Total trip spend ($M)(a)(b)		Change
Country of residence	2019-02-01	2023-02-01	'000	%	2019-02-01	2023-02-01	'000	%	2019-02-01	2023-02-01	$M	%	2019-02-01	2023-02-01	$M	%
New Zealand	76	73	-3	-4	604	892	288	48	88	125	38	43	142	205	64	45
Japan	34	23	-11	-32	788	np	np	np	100	np	np	np	155	np	np	np
Hong Kong	27	np	np	np	720	np	np	np	113	np	np	np	154	np	np	np
Singapore	23	19	-4	-17	np	np	np	np	94	np	np	np	119	np	np	np
Malaysia	22	13	-9	-41	812	np	np	np	128	np	np	np	154	np	np	np
Indonesia	10	14	3	30	533	742	209	39	np	np	np	np	np	np	np	np
Taiwan	17	np	np	np	753	np	np	np	61	np	np	np	91	np	np	np
Thailand	np	np	np	np	np	np	np	np	np	np	np	np	np	np	np	np
Korea	22	22	0	0	1088	567	-520	-48	118	107	-10	-9	168	155	-13	-8
China	169	40	-129	-76	8891	np	np	np	1584	1058	-527	-33	1908	1183	-725	-38
India	27	30	2	8	2074	2704	630	30	131	np	np	np	171	288	117	68
Other Asia	30	38	8	26	1955	np	np	np	181	np	np	np	230	np	np	np
United States of America	76	67	-9	-12	1315	1054	-261	-20	228	186	-42	-18	489	483	-7	-1
Canada	23	18	-5	-23	691	654	-36	-5	86	80	-6	-7	133	132	-1	-1
United Kingdom	66	69	3	4	2265	2365	100	4	197	249	52	26	358	506	148	41
Germany	18	17	-1	-6	708	710	2	0	58	61	3	5	110	114	4	4
Scandinavia	9	np	np	np	392	np	np	np	36	np	np	np	58	np	np	np
France	12	np	np	np	539	np	np	np	44	np	np	np	71	np	np	np
Italy	np	np	np	np	np	np	np	np	np	np	np	np	np	np	np	np
Netherlands	5	np	np	np	257	np	np	np	22	np	np	np	34	np	np	np
Switzerland	np	np	np	np	np	np	np	np	np	np	np	np	np	np	np	np
Other Europe	22	24	1	6	747	np	np	np	np	np	np	np	129	168	39	30
Other Countries	39	44	5	12	1797	2771	974	54	146	np	np	np	218	369	151	69
Total	744	571	-173	-23	28753	27146	-1607	-6	3672	3516	-156	-4	5128	5042	-85	-2
March
	Trips ('000)		Change		Nights ('000)		Change		Spend in Australia ($M)(a)		Change		Total trip spend ($M)(a)(b)		Change
Country of residence	2019-03-01	2023-03-01	'000	%	2019-03-01	2023-03-01	'000	%	2019-03-01	2023-03-01	$M	%	2019-03-01	2023-03-01	$M	%
New Zealand	98	89	-9	-9	909	975	66	7	126	141	15	12	212	230	18	9
Japan	53	24	-29	-54	1236	522	-713	-58	142	68	-74	-52	248	124	-124	-50
Hong Kong	30	np	np	np	720	np	np	np	108	np	np	np	168	np	np	np
Singapore	42	27	-15	-35	426	263	-163	-38	118	61	-57	-48	162	113	-49	-30
Malaysia	28	12	-16	-58	639	239	-399	-63	89	37	-52	-58	116	61	-56	-48
Indonesia	14	12	-2	-15	405	np	np	np	np	np	np	np	52	np	np	np
Taiwan	18	np	np	np	1027	np	np	np	63	np	np	np	88	np	np	np
Thailand	7	np	np	np	327	np	np	np	31	np	np	np	38	np	np	np
Korea	30	18	-12	-39	1050	np	np	np	136	91	-45	-33	187	131	-57	-30
China	160	26	-133	-84	6679	np	np	np	1246	197	-1049	-84	1550	253	-1296	-84
India	29	37	8	28	1892	np	np	np	130	np	np	np	178	173	-5	-3
Other Asia	34	43	9	26	2163	2497	334	15	171	np	np	np	225	215	-10	-5
United States of America	90	61	-30	-33	1525	990	-535	-35	271	203	-68	-25	504	446	-58	-12
Canada	21	16	-5	-24	441	670	228	52	58	53	-6	-10	104	114	10	10
United Kingdom	76	68	-7	-10	2174	2248	74	3	232	216	-17	-7	410	440	30	7
Germany	22	16	-6	-28	732	713	-19	-3	64	70	6	10	112	118	6	6
Scandinavia	12	np	np	np	573	np	np	np	74	np	np	np	100	np	np	np
France	14	np	np	np	848	np	np	np	56	np	np	np	99	np	np	np
Italy	np	np	np	np	np	np	np	np	np	np	np	np	np	np	np	np
Netherlands	6	np	np	np	263	np	np	np	27	np	np	np	41	np	np	np
Switzerland	np	np	np	np	np	np	np	np	np	np	np	np	np	np	np	np
Other Europe	25	23	-2	-10	2231	np	np	np	179	90	-89	-50	237	147	-89	-38
Other Countries	45	45	0	1	2390	2391	0	0	225	237	12	5	311	343	32	10
Total	863	577	-287	-33	29246	19374	-9871	-34	3647	2043	-1604	-44	5233	3399	-1834	-35
April
	Trips ('000)		Change		Nights ('000)		Change		Spend in Australia ($M)(a)		Change		Total trip spend ($M)(a)(b)		Change
Country of residence	2019-04-01	2023-04-01	'000	%	2019-04-01	2023-04-01	'000	%	2019-04-01	2023-04-01	$M	%	2019-04-01	2023-04-01	$M	%
New Zealand	106	97	-8	-8	993	1521	528	53	127	170	43	34	212	273	61	29
Japan	22	14	-9	-38	535	615	80	15	60	67	8	13	102	99	-4	-3
Hong Kong	30	np	np	np	775	np	np	np	163	np	np	np	236	np	np	np
Singapore	25	23	-2	-8	307	291	-16	-5	50	52	1	3	82	81	-1	-2
Malaysia	23	14	-9	-39	354	257	-97	-27	47	np	np	np	68	np	np	np
Indonesia	17	19	3	17	np	507	np	np	np	60	np	np	np	91	np	np
Taiwan	16	np	np	np	623	np	np	np	55	np	np	np	80	np	np	np
Thailand	12	np	np	np	452	np	np	np	47	np	np	np	59	np	np	np
Korea	22	15	-7	-32	1052	305	-747	-71	99	68	-31	-31	140	88	-51	-37
China	98	31	-67	-69	3239	1324	-1915	-59	464	346	-119	-26	614	418	-196	-32
India	29	33	4	13	1515	1607	91	6	107	132	25	23	161	193	32	20
Other Asia	28	40	13	45	1214	1362	148	12	84	128	44	52	118	178	61	52
United States of America	62	44	-18	-30	1275	831	-444	-35	179	147	-32	-18	341	301	-40	-12
Canada	14	11	-2	-17	524	321	-203	-39	42	50	7	17	69	93	23	34
United Kingdom	53	39	-14	-26	1763	1157	-605	-34	153	124	-28	-19	281	252	-29	-10
Germany	12	9	-3	-24	377	304	-73	-19	41	34	-7	-17	65	65	0	0
Scandinavia	7	np	np	np	266	np	np	np	29	np	np	np	50	np	np	np
France	8	np	np	np	289	np	np	np	31	np	np	np	47	np	np	np
Italy	np	np	np	np	np	np	np	np	np	np	np	np	np	np	np	np
Netherlands	np	np	np	np	np	np	np	np	np	np	np	np	np	np	np	np
Switzerland	np	np	np	np	np	np	np	np	np	np	np	np	np	np	np	np
Other Europe	20	15	-5	-25	1368	577	-791	-58	97	53	-44	-45	136	96	-40	-29
Other Countries	46	40	-6	-13	1877	1851	-25	-1	125	182	57	46	200	260	60	30
Total	658	497	-161	-24	19910	15973	-3937	-20	2109	1915	-194	-9	3218	2943	-275	-9
May
	Trips ('000)		Change		Nights ('000)		Change		Spend in Australia ($M)(a)		Change		Total trip spend ($M)(a)(b)		Change
Country of residence	2019-05-01	2023-05-01	'000	%	2019-05-01	2023-05-01	'000	%	2019-05-01	2023-05-01	$M	%	2019-05-01	2023-05-01	$M	%
New Zealand	109	91	-17	-16	1046	945	-101	-10	135	143	8	6	207	233	26	12
Japan	33	18	-15	-46	710	406	-304	-43	95	62	-32	-34	172	104	-67	-39
Hong Kong	22	np	np	np	423	np	np	np	np	np	np	np	np	np	np	np
Singapore	38	33	-5	-13	543	462	-81	-15	82	96	14	18	119	135	16	13
Malaysia	35	16	-19	-56	429	235	-195	-45	56	31	-25	-44	84	50	-34	-40
Indonesia	13	15	3	21	np	470	np	np	46	48	2	5	56	66	10	18
Taiwan	11	np	np	np	582	np	np	np	39	np	np	np	53	np	np	np
Thailand	9	np	np	np	522	np	np	np	48	np	np	np	57	np	np	np
Korea	17	18	1	4	900	348	-552	-61	79	67	-12	-15	105	101	-4	-4
China	97	31	-66	-68	2574	np	np	np	410	274	-136	-33	553	350	-202	-37
India	41	38	-3	-8	2098	1592	-506	-24	79	100	21	27	143	171	28	20
Other Asia	41	43	2	5	1769	2363	594	34	79	144	65	81	126	198	72	57
United States of America	52	40	-12	-22	797	878	82	10	110	149	39	36	236	297	61	26
Canada	12	9	-2	-19	426	263	-163	-38	39	29	-10	-26	63	52	-11	-18
United Kingdom	36	24	-12	-33	1368	816	-552	-40	105	88	-17	-16	181	162	-18	-10
Germany	11	6	-4	-42	510	249	-261	-51	37	np	np	np	61	np	np	np
Scandinavia	4	np	np	np	204	np	np	np	20	np	np	np	30	np	np	np
France	9	7	-2	-23	392	347	-46	-12	26	25	-1	-4	42	51	9	22
Italy	4	np	np	np	274	np	np	np	18	np	np	np	28	np	np	np
Netherlands	np	np	np	np	np	np	np	np	np	np	np	np	np	np	np	np
Switzerland	np	np	np	np	np	np	np	np	np	np	np	np	np	np	np	np
Other Europe	14	12	-2	-15	701	597	-104	-15	53	46	-7	-13	80	81	0	0
Other Countries	40	40	0	0	1722	2315	593	34	103	185	81	79	159	279	120	76
Total	652	481	-172	-26	18679	15660	-3019	-16	1777	1696	-82	-5	2731	2635	-95	-3
np. Data is not publishable as the survey error is too high for most practical purposes.
Note: 'Trips' were previously referred to as 'Visitors'.
Note: Monthly estimates may not sum to other published quarterly or year ending estimates due to differences in calculation methodology.
a. Spend in Australia and Total trip spend differ. Total spend includes purchases made overseas such as international connections and stopovers, including airfares, and other pre-travel or post-travel spend in the source market or elsewhere outside Australia on things like luggage, visas, duty-free retail and ground transport.
b. Total trip spend includes international airfare and package tour expenditure.
Estimates are for international visitors aged 15 years and over.
Source: Tourism Research Australia: International Visitor Survey

## Sheet: TABLE 2
Monthly international travel estimates by main reason for visit
January
	Trips ('000)		Change		Nights ('000)		Change		Spend in Australia ($M)		Change		Total trip spend ($M)(b)		Change
Main reason for visit	2019-01-01	2023-01-01	'000	%	2019-01-01	2023-01-01	'000	%	2019-01-01	2023-01-01	'000	%	2019-01-01	2023-01-01	'000	%
Holiday	323	145	-178	-55	8182	3519	-4663	-57	982	485	-497	-51	1661	951	-710	-43
Visiting friends and relatives	233	147	-85	-37	6672	4473	-2199	-33	450	348	-102	-23	822	761	-61	-7
Business	44	23	-21	-47	435	213	-222	-51	77	38	-39	-50	180	108	-71	-40
Employment	14	24	10	69	2133	2383	250	12	130	164	35	27	167	228	61	36
Education	83	31	-52	-63	15103	6013	-9090	-60	2339	794	-1544	-66	2477	889	-1588	-64
Other reason	np	np	np	np	np	np	np	np	np	np	np	np	np	np	np	np
Total(a)	716	385	-332	-46	33455	17186	-16269	-49	4029	1859	-2170	-54	5403	3017	-2386	-44
February
	Trips ('000)		Change		Nights ('000)		Change		Spend in Australia ($M)		Change		Total trip spend ($M)(b)		Change
Main reason for visit	2019-02-01	2023-02-01	'000	%	2019-02-01	2023-02-01	'000	%	2019-02-01	2023-02-01	$M	%	2019-02-01	2023-02-01	$M	%
Holiday	349	205	-144	-41	7283	5103	-2179	-30	1067	705	-363	-34	1792	1262	-530	-30
Visiting friends and relatives	174	189	15	8	5293	7162	1869	35	349	456	107	31	610	873	263	43
Business	94	60	-34	-36	1033	588	-445	-43	232	172	-60	-26	465	373	-92	-20
Employment	19	18	-1	-7	3439	1932	-1506	-44	248	139	-109	-44	295	190	-104	-35
Education	76	74	-2	-3	9879	11479	1600	16	1656	1966	310	19	1773	2203	430	24
Other reason	np	12	np	np	np	np	np	np	np	np	np	np	np	np	np	np
Total(a)	744	571	-173	-23	28753	27146	-1607	-6	3672	3516	-156	-4	5128	5042	-85	-2
March
	Trips ('000)		Change		Nights ('000)		Change		Spend in Australia ($M)		Change		Total trip spend ($M)(b)		Change
Main reason for visit	2019-03-01	2023-03-01	'000	%	2019-03-01	2023-03-01	'000	%	2019-03-01	2023-03-01	$M	%	2019-03-01	2023-03-01	$M	%
Holiday	414	213	-201	-48	8475	4950	-3526	-42	1135	675	-460	-41	1935	1274	-661	-34
Visiting friends and relatives	216	228	12	5	5518	7048	1531	28	375	424	49	13	656	842	187	28
Business	108	65	-43	-40	1034	688	-346	-33	236	224	-12	-5	422	396	-26	-6
Employment	30	22	-7	-25	5893	2174	-3719	-63	547	138	-409	-75	620	175	-444	-72
Education	73	30	-43	-59	7518	3979	-3539	-47	1286	544	-742	-58	1494	634	-860	-58
Other reason	np	9	np	np	np	np	np	np	np	np	np	np	np	51	np	np
Total(a)	863	577	-287	-33	29246	19374	-9871	-34	3647	2043	-1604	-44	5233	3399	-1834	-35
April
	Trips ('000)		Change		Nights ('000)		Change		Spend in Australia ($M)		Change		Total trip spend ($M)(b)		Change
Main reason for visit	2019-04-01	2023-04-01	'000	%	2019-04-01	2023-04-01	'000	%	2019-04-01	2023-04-01	$M	%	2019-04-01	2023-04-01	$M	%
Holiday	292	188	-103	-35	6046	4446	-1600	-27	815	566	-248	-31	1294	946	-348	-27
Visiting friends and relatives	227	204	-23	-10	6834	4910	-1924	-28	372	364	-8	-2	677	734	56	8
Business	81	47	-34	-42	1134	573	-561	-49	270	115	-156	-58	490	218	-272	-56
Employment	16	17	0	3	2310	1824	-486	-21	158	131	-27	-17	186	175	-12	-6
Education	24	27	3	12	2509	3755	1246	50	402	695	294	73	445	797	353	79
Other reason	np	8	np	np	np	458	np	np	np	42	np	np	np	60	np	np
Total(a)	658	497	-161	-24	19910	15973	-3937	-20	2109	1915	-194	-9	3218	2943	-275	-9
May
	Trips ('000)		Change		Nights ('000)		Change		Spend in Australia ($M)		Change		Total trip spend ($M)(b)		Change
Main reason for visit	2019-05-01	2023-05-01	'000	%	2019-05-01	2023-05-01	'000	%	2019-05-01	2023-05-01	$M	%	2019-05-01	2023-05-01	$M	%
Holiday	303	177	-126	-41	5935	3839	-2096	-35	688	523	-164	-24	1100	831	-269	-24
Visiting friends and relatives	203	173	-30	-15	6276	5072	-1204	-19	326	246	-80	-25	553	543	-11	-2
Business	87	71	-16	-18	856	626	-230	-27	185	187	2	1	376	367	-9	-2
Employment	16	20	4	24	2523	2570	47	2	167	178	11	7	208	237	29	14
Education	22	24	2	8	2424	3239	815	34	349	541	193	55	383	611	228	59
Other reason	15	np	np	np	np	np	np	np	62	np	np	np	98	np	np	np
Total(a)	652	481	-172	-26	18679	15660	-3019	-16	1777	1696	-82	-5	2731	2635	-95	-3
np. Data is not publishable as the survey error is too high for most practical purposes.
Note: 'Trips' were previously referred to as 'Visitors'.
Note: Monthly estimates may not sum to other published quarterly or year ending estimates due to differences in calculation methodology.
a. Total includes international transit visitors.
b. Spend in Australia and Total trip spend differ. Total spend includes purchases made overseas such as international connections and stopovers, including airfares, and other pre-travel or post-travel spend in the source market or elsewhere outside Australia on things like luggage, visas, duty-free retail and ground transport.
Estimates are for international visitors aged 15 years and over.
Source: Tourism Research Australia: International Visitor Survey

## Sheet: TABLE 3
Monthly international travel estimates by states and territories visited
January
	Trips ('000)(a)		Change		Nights ('000)(b)		Change		Spend in Australia ($M)(c)		Change
State / Territory	2019-01-01	2023-01-01	'000	%	2019-01-01	2023-01-01	'000	%	2019-01-01	2023-01-01	'000	%
New South Wales	383	202	-181	-47	12314	6240	-6073	-49	1551	672	-879	-57
Victoria	276	110	-166	-60	8227	3299	-4928	-60	1134	424	-710	-63
Queensland	226	105	-121	-54	6308	3266	-3042	-48	670	401	-269	-40
South Australia	49	39	-10	-20	1647	np	np	np	225	79	-146	-65
Western Australia	86	58	-28	-32	2838	2297	-541	-19	234	205	-30	-13
Tasmania	35	15	-20	-57	684	np	np	np	np	np	np	np
Northern Territory	21	7	-15	-69	np	np	np	np	np	np	np	np
Australian Capital Territory	32	11	-21	-65	912	np	np	np	np	np	np	np
Total	716	385	-332	-46	33455	17186	-16269	-49	4029	1859	-2170	-54
February
	Trips ('000)(a)		Change		Nights ('000)(b)		Change		Spend in Australia ($M)(c)		Change
State / Territory	2019-02-01	2023-02-01	'000	%	2019-02-01	2023-02-01	'000	%	2019-02-01	2023-02-01	'000	%
New South Wales	399	326	-73	-18	10448	9639	-809	-8	1419	1476	58	4
Victoria	287	177	-110	-38	8646	np	np	np	1066	681	-385	-36
Queensland	233	158	-76	-32	5340	5638	298	6	685	659	-26	-4
South Australia	44	42	-2	-4	1131	np	np	np	132	np	np	np
Western Australia	72	69	-4	-5	2254	2745	491	22	269	238	-31	-11
Tasmania	36	25	-11	-31	406	np	np	np	60	np	np	np
Northern Territory	19	18	-1	-5	153	np	np	np	17	np	np	np
Australian Capital Territory	21	17	-5	-23	323	np	np	np	24	np	np	np
Total	744	571	-173	-23	28753	27146	-1607	-6	3672	3516	-156	-4
March
	Trips ('000)(a)		Change		Nights ('000)(b)		Change		Spend in Australia ($M)(c)		Change
State / Territory	2019-03-01	2023-03-01	'000	%	2019-03-01	2023-03-01	'000	%	2019-03-01	2023-03-01	'000	%
New South Wales	442	305	-137	-31	9597	6953	-2644	-28	1270	780	-490	-39
Victoria	354	183	-172	-48	9967	4186	-5781	-58	1338	484	-855	-64
Queensland	240	157	-84	-35	4303	3684	-619	-14	461	430	-31	-7
South Australia	58	39	-20	-34	1564	705	-859	-55	173	71	-102	-59
Western Australia	92	80	-12	-13	2499	2689	190	8	275	213	-62	-23
Tasmania	38	23	-15	-39	528	np	np	np	48	np	np	np
Northern Territory	25	12	-13	-52	np	64	np	np	32	14	-19	-58
Australian Capital Territory	25	21	-4	-16	433	np	np	np	np	np	np	np
Total	863	577	-287	-33	29246	19374	-9871	-34	3647	2043	-1604	-44
April
	Trips ('000)(a)		Change		Nights ('000)(b)		Change		Spend in Australia ($M)(c)		Change
State / Territory	2019-04-01	2023-04-01	'000	%	2019-04-01	2023-04-01	'000	%	2019-04-01	2023-04-01	'000	%
New South Wales	333	242	-91	-27	6770	5082	-1688	-25	755	755	0	0
Victoria	237	152	-85	-36	5471	2989	-2481	-45	505	375	-130	-26
Queensland	198	143	-55	-28	4243	3933	-310	-7	455	395	-60	-13
South Australia	36	42	5	14	528	1091	564	107	67	np	np	np
Western Australia	75	68	-8	-10	1800	2304	504	28	178	211	34	19
Tasmania	28	15	-13	-46	415	222	-193	-47	73	30	-44	-60
Northern Territory	17	11	-6	-35	171	np	np	np	21	np	np	np
Australian Capital Territory	20	16	-4	-20	np	np	np	np	54	np	np	np
Total	658	497	-161	-24	19910	15973	-3937	-20	2109	1915	-194	-9
May
	Trips ('000)(a)		Change		Nights ('000)(b)		Change		Spend in Australia ($M)(c)		Change
State / Territory	2019-05-01	2023-05-01	'000	%	2019-05-01	2023-05-01	'000	%	2019-05-01	2023-05-01	'000	%
New South Wales	330	246	-84	-26	6556	5757	-799	-12	662	698	35	5
Victoria	232	166	-66	-29	4408	3308	-1100	-25	447	374	-73	-16
Queensland	214	145	-69	-32	4145	3231	-913	-22	376	335	-41	-11
South Australia	27	29	1	5	518	530	11	2	48	63	15	31
Western Australia	71	54	-17	-24	2137	2010	-127	-6	167	153	-14	-8
Tasmania	14	14	0	-3	433	np	np	np	27	np	np	np
Northern Territory	16	9	-7	-45	145	np	np	np	18	15	-3	-16
Australian Capital Territory	21	23	2	7	np	334	np	np	32	np	np	np
Total	652	481	-172	-26	18679	15660	-3019	-16	1777	1696	-82	-5
np. Data is not publishable as the survey error is too high for most practical purposes.
Note: 'Trips' were previously referred to as 'Visitors'.
Note: Monthly estimates may not sum to other published quarterly or year ending estimates due to differences in calculation methodology.
a. State and territory trip total will not sum to the Australian total as international visitors may have visited more than one state while in Australia.
b. State and territory nights total will not sum to the Australian total as some international visitors are in transit and thus do not have a stopover in any state/territory.
c. Spend in Australia state estimates are produced from TRA's regional expenditure model.
Estimates are for international visitors aged 15 years and over.
Source: Tourism Research Australia: International Visitor Survey

## Sheet: TABLE 4
Monthly international travel estimates by capital/regional
January
	Trips ('000)(a)		Change		Nights ('000)(b)		Change		Spend in Australia ($M)(c)		Change
Capital / Regional	2019-01-01	2023-01-01	'000	%	2019-01-01	2023-01-01	'000	%	2019-01-01	2023-01-01	'000	%
Capital cities and Gold Coast	673	357	-315	-47	27787	13659	-14128	-51	3536	1602	-1934	-55
Rest of Australia	278	140	-138	-50	5668	3527	-2141	-38	493	258	-236	-48
Total	716	385	-332	-46	33455	17186	-16269	-49	4029	1859	-2170	-54
February
	Trips ('000)(a)		Change		Nights ('000)(b)		Change		Spend in Australia ($M)(c)		Change
Capital / Regional	2019-02-01	2023-02-01	'000	%	2019-02-01	2023-02-01	'000	%	2019-02-01	2023-02-01	'000	%
Capital cities and Gold Coast	698	537	-161	-23	24277	22455	-1823	-8	3219	3176	-42	-1
Rest of Australia	252	186	-66	-26	4475	4691	216	5	453	340	-113	-25
Total	744	571	-173	-23	28753	27146	-1607	-6	3672	3516	-156	-4
March
	Trips ('000)(a)		Change		Nights ('000)(b)		Change		Spend in Australia ($M)(c)		Change
Capital / Regional	2019-03-01	2023-03-01	'000	%	2019-03-01	2023-03-01	'000	%	2019-03-01	2023-03-01	'000	%
Capital cities and Gold Coast	806	533	-274	-34	23953	15533	-8420	-35	3237	1698	-1539	-48
Rest of Australia	290	197	-93	-32	5293	3841	-1452	-27	410	345	-65	-16
Total	863	577	-287	-33	29246	19374	-9871	-34	3647	2043	-1604	-44
April
	Trips ('000)(a)		Change		Nights ('000)(b)		Change		Spend in Australia ($M)(c)		Change
Capital / Regional	2019-04-01	2023-04-01	'000	%	2019-04-01	2023-04-01	'000	%	2019-04-01	2023-04-01	'000	%
Capital cities and Gold Coast	612	462	-150	-25	15210	12155	-3055	-20	1735	1640	-94	-5
Rest of Australia	229	173	-56	-24	4700	3818	-882	-19	374	275	-99	-27
Total	658	497	-161	-24	19910	15973	-3937	-20	2109	1915	-194	-9
May
	Trips ('000)(a)		Change		Nights ('000)(b)		Change		Spend in Australia ($M)(c)		Change
Capital / Regional	2019-05-01	2023-05-01	'000	%	2019-05-01	2023-05-01	'000	%	2019-05-01	2023-05-01	'000	%
Capital cities and Gold Coast	610	446	-163	-27	14657	12518	-2139	-15	1475	1490	14	1
Rest of Australia	192	131	-60	-32	4023	3142	-881	-22	302	206	-96	-32
Total	652	481	-172	-26	18679	15660	-3019	-16	1777	1696	-82	-5
np. Data is not publishable as the survey error is too high for most practical purposes.
Note: 'Trips' were previously referred to as 'Visitors'.
Note: Monthly estimates may not sum to other published quarterly or year ending estimates due to differences in calculation methodology.
a. Capital city regional trip total will not sum to the Australian total as international visitors may have visited more than one state while in Australia.
b. Capital city regional nights total will not sum to the Australian total as some international visitors are in transit and thus do not have a stopover in any state/territory.
c. Spend in Australia capital city regional estimates are produced from TRA's regional expenditure model.
Estimates are for international visitors aged 15 years and over
Source: Tourism Research Australia: International Visitor Survey

## Sheet: RSE
Relative standard errors for estimates
2023-05-01	5	9	13	17
	Trips ('000)	Nights ('000)	Spend in Australia ($M)	Total trip spend ($M)
Country of residence
New Zealand	3.32037	6.63014	6.89034	5.5097
Japan	6.51328	19.9006	20.4918	15.356
Hong Kong	23.6315	42.5174	23.2584	24.5613
Singapore	12.2192	19.9596	19.505	15.9797
Malaysia	14.7397	16.6649	17.0802	15.5925
Indonesia	12.4018	18.2672	15.0866	14.7028
Taiwan	24.568	34.0371	31.1831	26.0859
Thailand	20.8775	34.3504	62.0317	53.572
Korea	17.2815	22.2498	17.2815	17.6041
China	18.2028	27.7563	8.76635	10.2876
India	21.5852	17.2545	18.4821	18.6441
Other Asia	13.5786	15.8083	17.8372	14.8281
United States of America	5.4274	20.0558	16.1993	10.6905
Canada	10.6737	18.23	22.8726	20.2039
United Kingdom	7.02037	11.0643	15.7467	10.6086
Germany	14.6964	15.0452	35.698	27.0101
Scandinavia	14.5144	20.6315	20.9361	15.8329
France	10.51	17.3715	19.6992	18.5408
Italy	33.1272	36.4344	41.3318	32.2444
Netherlands	18.9782	24.8469	20.3609	18.8337
Switzerland	22.0838	42.3342	53.6071	34.2578
Other Europe	10.0678	17.1105	13.7533	11.3303
Other Countries	6.62469	13.8788	13.8258	11.9651
Main reason for visit
Holiday	5.26513	9.3234	6.37814	7.29777
Visiting friends and relatives	6.51535	12.9137	7.72668	8.19682
Business	5.57332	12.7238	8.91476	10.2127
Employment	6.69688	9.12047	8.86514	9.33174
Education	10.0712	13.3296	15.0188	15.1162
Other reason	13.235	23.8283	14.1945	19.2336
State / Territory
New South Wales	4.94882	9.9638	6.11502
Victoria	7.4142	12.2172	9.9131
Queensland	4.33831	9.67904	11.1878
South Australia	18.2248	19.0123	19.7465
Western Australia	7.45705	13.4214	11.1001
Tasmania	26.0326	29.1495	25.3369
Northern Territory	12.7648	33.2079	20.4072
Australian Capital Territory	20.431	23.8717	25.293
Capital / Regional
Capital cities and Gold Coast	3.45558	6.32528	4.90027
Rest of Australia	4.99898	10.8398	9.32724
Total	3.27066	5.72898	4.58544
